# Supplementary material for: Systemic identification and characterization of the conserved core NuRD complex in planarian
Source: Front Aging. 2025 Sep 30;6:1687668. doi: 10.3389/fragi.2025.1687668 (PMC12518275; doi:10.3389/fragi.2025.1687668)
Supplement: Supplementary file 1 [file Table2.xlsx]

## Sheet: Alignment statistics
Alignment statistics of MBD2/3(RNAi) mRNA-seq rawdata
Sample	Total	Unmapped(%)	Unique_Mapped(%)	Multiple_Mapped(%)	Total_Mapped(%)
MBD2/3_3dpi-1	24750606	1939357 (7.84%)	20773888 (83.93%)	2037361 (8.23%)	22811249 (92.16%)
MBD2/3_3dpi-2	30621594	2065483 (6.75%)	26138106 (85.36%)	2418005 (7.90%)	28556111 (93.25%)
MBD2/3_3dpi-3	33644632	1785905 (5.31%)	29258093 (86.96%)	2600634 (7.73%)	31858727 (94.69%)
GFP_3dpi-1	34269414	1517818 (4.43%)	29659888 (86.55%)	3091708 (9.02%)	32751596 (95.57%)
GFP_3dpi-2	32609242	1672982 (5.13%)	28281381 (86.73%)	2654879 (8.14%)	30936260 (94.87%)
GFP_3dpi-3	31157738	1747592 (5.61%)	27272393 (87.53%)	2137753 (6.86%)	29410146 (94.39%)
MBD2/3_7dpi-1	32291508	1749477 (5.42%)	28193046 (87.31%)	2348985 (7.27%)	30542031 (94.58%)
MBD2/3_7dpi-2	33992322	1881236 (5.53%)	29728239 (87.46%)	2382847 (7.01%)	32111086 (94.47%)
MBD2/3_7dpi-3	38470366	2163139 (5.62%)	33649613 (87.47%)	2657614 (6.91%)	36307227 (94.38%)
GFP_7dpi-1	35563712	2495971 (7.02%)	30621049 (86.10%)	2446692 (6.88%)	33067741 (92.98%)
GFP_7dpi-2	40281880	2685596 (6.67%)	34700484 (86.14%)	2895800 (7.19%)	37596284 (93.33%)
GFP_7dpi-3	64697674	3870711 (5.98%)	56052598 (86.64%)	4774365 (7.38%)	60826963 (94.02%)
MBD2/3_11dpi-1	32173454	2145438 (6.67%)	27726904 (86.18%)	2301112 (7.15%)	30028016 (93.33%)
MBD2/3_11dpi-2	35669626	2543800 (7.13%)	30680367 (86.01%)	2445459 (6.86%)	33125826 (92.87%)
MBD2/3_11dpi-3	35264660	2553786 (7.24%)	30170140 (85.55%)	2540734 (7.20%)	32710874 (92.76%)
GFP_11dpi-1	41081502	2250431 (5.48%)	35867275 (87.31%)	2963796 (7.21%)	38831071 (94.52%)
GFP_11dpi-2	32290552	2171900 (6.73%)	27857499 (86.27%)	2261153 (7.00%)	30118652 (93.27%)
GFP_11dpi-3	39281386	2436978 (6.20%)	34128766 (86.88%)	2715642 (6.91%)	36844408 (93.80%)
MBD2/3_15dpi-1	38545940	1521241 (3.95%)	33818025 (87.73%)	3206674 (8.32%)	37024699 (96.05%)
MBD2/3_15dpi-2	33614932	2374982 (7.07%)	28799204 (85.67%)	2440746 (7.26%)	31239950 (92.93%)
MBD2/3_15dpi-3	46453958	1906879 (4.10%)	40944513 (88.14%)	3602566 (7.76%)	44547079 (95.90%)
GFP_15dpi-1	29277882	1985032 (6.78%)	25177085 (85.99%)	2115765 (7.23%)	27292850 (93.22%)
GFP_15dpi-2	32591206	2169325 (6.66%)	28115234 (86.27%)	2306647 (7.08%)	30421881 (93.34%)
GFP_15dpi-3	35997700	2399356 (6.67%)	30907562 (85.86%)	2690782 (7.47%)	33598344 (93.33%)

## Sheet: MBD2-3_3dpi_diff_gene
Transcriptome profiling at 3 dpi after depletion of MBD2/3
Gene_name	log2FoldChange	pvalue	padj	change	Symbol	Description
SMESG000004630.1	-2.58167	1.19221e-08	5.3415e-05	Down	--	XP_018645073.1 Venom allergen-like (VAL) 14 protein [Schistosoma mansoni]
SMESG000028264.1	-3.39083	2.86303e-06	0.00769641	Down	--	ADW66116.1 lectin-like protein, partial [Schmidtea mediterranea]
SMESG000061316.1	-3.19991	7.67663e-14	1.03182e-09	Down	--	-
SMESG000064034.1	-1.63675	2.9485e-13	1.98154e-09	Down	MBD2	AHB82104.1 methyl-CpG binding domain 2/3 [Schmidtea mediterranea]
SMESG000074187.1	-4.2719	2.31262e-06	0.00769641	Down	LIPA	KAA3682135.1 lysosomal acid lipase/cholesteryl ester hydrolase [Paragonimus westermani]

## Sheet: MBD2-3_7dpi_diff_gene
Transcriptome profiling at 7 dpi after depletion of MBD2/3
Gene_name	log2FoldChange	pvalue	padj	change	Symbol	Description
SMESG000000436.1	-0.876292	0.000326011	0.0397622	Down	--	-
SMESG000002858.1	1.00582	0.000886464	0.0739757	Up	--	XP_018645986.1 acid sensing ion channel 4, pituitary, putative [Schistosoma mansoni]
SMESG000006040.1	2.84986	9.56981e-21	3.41403e-17	Up	H2AJ	XP_025197454.1 histone H2A [Melanaphis sacchari]
SMESG000006319.1	1.21929	0.000165099	0.0250128	Up	--	-
SMESG000010665.1	1.05433	1.91644e-05	0.00515991	Up	--	KAA0188900.1 hypothetical protein FBUS_02218 [Fasciolopsis buski]
SMESG000013935.1	1.8266	6.74342e-06	0.00218701	Up	--	XP_018654487.1 putative anaphase-promoting complex subunit [Schistosoma mansoni]
SMESG000015726.1	1.62187	4.92749e-05	0.0101906	Up	--	VDQ07944.1 unnamed protein product [Trichobilharzia regenti]
SMESG000023959.1	2.15504	6.68168e-08	4.74743e-05	Up	--	-
SMESG000030111.1	0.96409	1.0202e-05	0.0030975	Up	slc24a5	AKN21566.1 slc24a-6, partial [Schmidtea mediterranea]
SMESG000030647.1	-0.821489	0.000661696	0.061715	Down	--	ADC84438.1 secreted peptide prohormone 18 [Schmidtea mediterranea]
SMESG000033377.1	1.16722	0.000239636	0.0310873	Up	Me1	KAF0299259.1 NADP-dependent malic enzyme [Amphibalanus amphitrite]
SMESG000044678.1	0.8438	1.89097e-11	5.39682e-08	Up	MPEG1	XP_015766206.1 PREDICTED: LOW QUALITY PROTEIN: macrophage-expressed gene 1 protein-like [Acropora digitifera]
SMESG000050640.1	-1.11455	9.9109e-08	6.14907e-05	Down	--	-
SMESG000052481.1	-0.964738	0.000203424	0.0287412	Down	--	-
SMESG000052739.1	1.15278	1.39208e-06	0.000640295	Up	ARF	XP_013394266.1 ADP-ribosylation factor [Lingula anatina]
SMESG000052741.1	1.54192	0.000157336	0.0241417	Up	ARF	XP_013394266.1 ADP-ribosylation factor [Lingula anatina]
SMESG000052762.1	1.29938	7.25784e-05	0.0136275	Up	ARF	XP_013394266.1 ADP-ribosylation factor [Lingula anatina]
SMESG000062943.1	-0.979437	0.000140824	0.0223284	Down	--	-
SMESG000063471.1	1.93003	2.22615e-25	1.05891e-21	Up	Cp1	PAV61346.1 hypothetical protein WR25_18197 [Diploscapter pachys]
SMESG000064034.1	-2.54362	3.09443e-75	4.41575e-71	Down	MBD2	AHB82104.1 methyl-CpG binding domain 2/3 [Schmidtea mediterranea]
SMESG000066596.1	0.872685	2.822e-08	2.51687e-05	Up	--	-
SMESG000066997.1	1.20795	0.000433994	0.0476392	Up	--	ARM37835.1 synaptotagmin XV-like protein [Schmidtea mediterranea]
SMESG000067906.1	1.02648	6.39583e-06	0.00212252	Up	his-48	AFJ24860.1 histone h2b-2, partial [Schmidtea mediterranea]
SMESG000068132.1	-0.913034	3.99538e-09	4.75118e-06	Down	Hsp90b1	AEE63339.1 unknown [Dendroctonus ponderosae]
SMESG000072026.1	-1.3023	5.03908e-05	0.0102725	Down	--	-
SMESG000074545.1	-1.06599	1.45018e-30	1.0347e-26	Down	RPL23A	XP_032877814.1 60S ribosomal protein L23a [Amblyraja radiata]
SMESG000076072.1	0.995208	4.68332e-08	3.71283e-05	Up	--	ANO38983.1 orphan chemoreceptor family protein [Schmidtea mediterranea]

## Sheet: MBD2-3_11dpi_diff_gene
Transcriptome profiling at 11 dpi after depletion of MBD2/3
Gene_name	log2FoldChange	pvalue	padj	change	Symbol	Description
SMESG000000287.1	1.11432	0.00076692	0.0131039	Up	svopl	OAF72203.1 putative transporter SVOPL [Intoshia linei]
SMESG000000371.1	-1.50025	0.0021493	0.0284257	Down	Traf3	ADD24555.1 TNF receptor-associated factor 6 [Lepeophtheirus salmonis]
SMESG000000421.1	-1.24284	0.00294254	0.0360606	Down	--	XP_012282303.1 TNF receptor-associated factor 6 [Orussus abietinus]
SMESG000000695.1	-0.835767	3.3328e-05	0.00105402	Down	--	-
SMESG000002858.1	1.44518	2.71861e-06	0.000137972	Up	--	XP_018645986.1 acid sensing ion channel 4, pituitary, putative [Schistosoma mansoni]
SMESG000003911.1	-0.908419	0.0019408	0.0262334	Down	--	-
SMESG000004806.1	0.817293	0.000225321	0.00499363	Up	azin2	XP_005095259.1 PREDICTED: ornithine decarboxylase-like [Aplysia californica]
SMESG000005268.1	-1.01132	0.0006256	0.0111207	Down	Pdia5	PVD35860.1 hypothetical protein C0Q70_02829 [Pomacea canaliculata]
SMESG000005474.1	-1.06294	2.05205e-06	0.00011055	Down	SLC47A1	AKN21701.1 slc47a-4, partial [Schmidtea mediterranea]
SMESG000005538.1	-1.47199	0.000817191	0.0137224	Down	ZNHIT2	XP_028400444.1 zinc finger HIT domain-containing protein 2-like [Dendronephthya gigantea]
SMESG000005713.1	0.915359	3.84679e-12	1.11737e-09	Up	Ace	AFJ24765.1 angiotensin converting enzyme-1, partial [Schmidtea mediterranea]
SMESG000005878.1	-0.860101	8.08091e-15	3.80416e-12	Down	--	-
SMESG000006040.1	3.44518	1.4501e-38	3.95937e-35	Up	H2AJ	XP_025197454.1 histone H2A [Melanaphis sacchari]
SMESG000006319.1	1.95732	3.92723e-08	4.25512e-06	Up	--	-
SMESG000006536.1	-0.809366	7.80324e-13	2.73153e-10	Down	MYO18A	XP_014789374.1 PREDICTED: unconventional myosin-XVIIIa-like [Octopus bimaculoides]
SMESG000007159.1	-1.08478	4.33758e-10	8.8383e-08	Down	--	-
SMESG000007405.1	-1.11932	2.75579e-06	0.000139341	Down	--	ACO06230.1 noggin-like protein 5 [Schmidtea mediterranea]
SMESG000007998.1	1.19273	0.000213225	0.00481148	Up	--	-
SMESG000008835.1	-0.892587	1.1204e-18	8.99749e-16	Down	--	AQT19797.1 hypothetical protein 12898, partial [Schmidtea mediterranea]
SMESG000008843.1	-0.989883	2.68717e-16	1.74692e-13	Down	--	AQT19794.1 hypothetical protein 5849, partial [Schmidtea mediterranea]
SMESG000008854.1	0.980152	0.000198399	0.00452934	Up	--	ANO39115.1 GCR160 [Schmidtea mediterranea]
SMESG000009262.1	1.39091	0.000232516	0.00509519	Up	osbpl9	VDD80091.1 unnamed protein product [Mesocestoides corti]
SMESG000009365.1	-0.832355	0.00373361	0.042869	Down	--	-
SMESG000009561.1	-1.00778	1.72024e-05	0.000616397	Down	--	XP_022625709.1 TNF receptor-associated factor 2-like isoform X2 [Seriola dumerili]
SMESG000009665.1	-0.89637	1.1787e-06	7.12739e-05	Down	ELOVL	XP_029644480.1 elongation of very long chain fatty acids protein AAEL008004-like [Octopus vulgaris]
SMESG000009948.1	-1.01833	2.20934e-06	0.000116455	Down	--	-
SMESG000010034.1	-0.956992	2.08126e-06	0.00011099	Down	--	-
SMESG000010069.1	0.996782	0.00548047	0.0560444	Up	--	-
SMESG000010201.1	-0.980432	4.06304e-08	4.36761e-06	Down	--	-
SMESG000010322.1	-0.906634	0.00478964	0.0511645	Down	--	-
SMESG000010503.1	0.807297	0.00264424	0.0334561	Up	--	-
SMESG000010665.1	1.3065	7.0777e-07	4.75984e-05	Up	--	KAA0188900.1 hypothetical protein FBUS_02218 [Fasciolopsis buski]
SMESG000011215.1	1.13288	1.04479e-09	1.82865e-07	Up	--	-
SMESG000011499.1	-1.1121	0.00504512	0.0527786	Down	svopl	OAF72203.1 putative transporter SVOPL [Intoshia linei]
SMESG000012031.1	-0.899894	0.00120778	0.0187157	Down	DDX5	KAA0188092.1 DEAD box ATP dependent RNA helicase [Fasciolopsis buski]
SMESG000012095.1	-0.811562	3.15903e-06	0.000152768	Down	BAHD1	XP_009172763.1 hypothetical protein T265_08633 [Opisthorchis viverrini]
SMESG000014167.1	-1.02051	0.00781753	0.0719655	Down	LCP2	AWM96389.1 cathepsin L2 [Dugesia japonica]
SMESG000014542.1	-1.20833	1.4567e-05	0.000538941	Down	--	-
SMESG000014544.1	-1.82878	3.04141e-06	0.000148415	Down	--	-
SMESG000014563.1	-2.83501	0.00332917	0.0393676	Down	--	-
SMESG000014578.1	-1.35668	8.24946e-22	1.40777e-18	Down	--	-
SMESG000014710.1	-1.41854	8.97132e-52	3.06191e-48	Down	--	-
SMESG000014730.1	-0.936412	2.56334e-05	0.000844895	Down	TRAF3	AFJ24792.1 TNF receptor associated factor-2, partial [Schmidtea mediterranea]
SMESG000014795.1	-1.51382	8.87051e-05	0.00233334	Down	--	-
SMESG000015726.1	2.02948	4.97758e-08	5.18732e-06	Up	--	VDQ07944.1 unnamed protein product [Trichobilharzia regenti]
SMESG000016239.1	-1.12963	0.00371192	0.0427453	Down	SPCC4F11.04c	XP_023932950.1 inositol phosphoceramide mannosyltransferase 2-like [Lingula anatina]
SMESG000016849.1	-1.43177	0.00337039	0.0397345	Down	--	XP_020612147.1 TNF receptor-associated factor 6-like [Orbicella faveolata]
SMESG000017325.1	-0.86278	0.000147	0.00352078	Down	Ccdc89	XP_004402438.1 PREDICTED: coiled-coil domain-containing protein 89 [Odobenus rosmarus divergens]
SMESG000017519.1	-0.865833	4.13815e-15	2.25976e-12	Down	--	XP_013080792.1 PREDICTED: microtubule-actin cross-linking factor 1-like isoform X1 [Biomphalaria glabrata]
SMESG000017520.1	-0.863133	0.00154077	0.0220769	Down	--	-
SMESG000018025.1	0.881712	0.00966131	0.0827974	Up	--	-
SMESG000018453.1	1.28873	0.000291162	0.00608721	Up	Plg	AFJ24868.1 plasminogen-1, partial [Schmidtea mediterranea]
SMESG000018472.1	-0.943726	6.3006e-19	5.73438e-16	Down	--	-
SMESG000018901.1	-1.10431	0.000166166	0.00386456	Down	--	-
SMESG000019618.1	-0.889978	7.59918e-08	7.25483e-06	Down	--	XP_025078672.1 LOW QUALITY PROTEIN: X-ray radiation resistance-associated protein 1-like [Pomacea canaliculata]
SMESG000020913.1	-0.825479	2.80025e-07	2.19707e-05	Down	cfap157	XP_015753145.1 PREDICTED: uncharacterized protein C9orf117 homolog [Acropora digitifera]
SMESG000021412.1	1.04197	1.32729e-20	2.01335e-17	Up	Bckdha	QFQ66889.1 BCKHDA-like protein [Schmidtea mediterranea]
SMESG000022330.1	-0.833177	0.0114945	0.0932256	Down	Os09g0362500	AFJ24858.1 hypothetical protein, partial [Schmidtea mediterranea]
SMESG000022749.1	-1.26148	4.71784e-05	0.00140629	Down	--	ANP44406.1 epidermal growth factor Smed-egf-1 [Schmidtea mediterranea]
SMESG000023427.1	0.831476	0.00123055	0.0189243	Up	--	-
SMESG000024156.1	-0.921209	0.000112918	0.00284419	Down	--	-
SMESG000024163.1	-0.81704	0.000110669	0.00280306	Down	--	-
SMESG000024478.1	1.07931	0.000323182	0.00660492	Up	--	AFJ24736.1 hypothetical protein, partial [Schmidtea mediterranea]
SMESG000024661.1	-0.878328	3.39776e-06	0.000162759	Down	--	XP_032782336.1 uncharacterized protein LOC116920275 [Daphnia magna]
SMESG000024833.1	-1.13637	7.23359e-23	1.41076e-19	Down	INHBA	AGX01005.1 activin 1 [Schmidtea mediterranea]
SMESG000027691.1	-1.30032	0.00136895	0.0203141	Down	--	-
SMESG000027870.1	0.802622	0.00981445	0.0835312	Up	cgh-1	PAA76022.1 hypothetical protein BOX15_Mlig032789g3 [Macrostomum lignano]
SMESG000028849.1	1.24412	7.70914e-10	1.40327e-07	Up	mfsd1	XP_032362340.1 major facilitator superfamily domain-containing protein 1 isoform X1 [Etheostoma spectabile]
SMESG000029291.1	-0.822968	0.000665729	0.011697	Down	--	PAA66905.1 hypothetical protein BOX15_Mlig002220g2 [Macrostomum lignano]
SMESG000029302.1	-0.929255	0.00704197	0.0670412	Down	--	-
SMESG000029581.1	1.22864	0.000598738	0.010769	Up	--	-
SMESG000029594.1	-1.48735	0.000110894	0.00280357	Down	--	-
SMESG000029906.1	-1.33372	0.00257057	0.0327976	Down	--	PAA57824.1 hypothetical protein BOX15_Mlig031394g1, partial [Macrostomum lignano]
SMESG000030111.1	0.871942	0.00248192	0.0320257	Up	slc24a5	AKN21566.1 slc24a-6, partial [Schmidtea mediterranea]
SMESG000031140.1	-0.913727	6.5041e-08	6.34243e-06	Down	--	THD25944.1 hypothetical protein D915_003191 [Fasciola hepatica]
SMESG000031543.1	0.918529	9.43816e-14	3.48242e-11	Up	Crispld2	XP_019925963.1 PREDICTED: TPR repeat-containing protein DDB_G0287407-like [Crassostrea gigas]
SMESG000031871.1	-0.922492	0.000706556	0.012241	Down	--	KAF0294543.1 Serine/threonine-protein phosphatase 2B catalytic subunit [Amphibalanus amphitrite]
SMESG000031930.1	0.83791	0.000108288	0.00276327	Up	mib1	XP_007070246.1 LOW QUALITY PROTEIN: E3 ubiquitin-protein ligase MIB2 [Chelonia mydas]
SMESG000032414.1	-1.19061	3.63395e-05	0.00112754	Down	--	-
SMESG000032426.1	-0.999987	0.00157197	0.0224473	Down	--	-
SMESG000033095.1	-1.21168	1.96897e-15	1.12002e-12	Down	SLC47A2	AKN21703.1 slc47a-6 [Schmidtea mediterranea]
SMESG000033377.1	1.1741	1.6619e-06	9.27063e-05	Up	Me1	KAF0299259.1 NADP-dependent malic enzyme [Amphibalanus amphitrite]
SMESG000033856.1	0.834037	0.00110572	0.0175051	Up	--	XP_027060459.1 trafficking protein particle complex subunit 1-like isoform X1 [Pocillopora damicornis]
SMESG000033958.1	-1.10374	5.64465e-28	1.28435e-24	Down	--	XP_029185063.1 hercynylcysteine sulfoxide lyase-like [Acropora millepora]
SMESG000034704.1	-1.37388	5.7519e-09	7.85249e-07	Down	--	ACO06230.1 noggin-like protein 5 [Schmidtea mediterranea]
SMESG000037362.1	-0.908021	2.18985e-10	4.67122e-08	Down	pm20d2	XP_014771841.1 PREDICTED: peptidase M20 domain-containing protein 2-like [Octopus bimaculoides]
SMESG000037418.1	-0.800705	6.72732e-15	3.28005e-12	Down	--	-
SMESG000037996.1	1.01851	3.00294e-06	0.00014797	Up	G2	AFJ24821.1 tissue factor pathway inhibitor-1 [Schmidtea mediterranea]
SMESG000039215.1	-0.819024	0.00136389	0.020261	Down	Rad50	XP_009162922.1 hypothetical protein T265_00786 [Opisthorchis viverrini]
SMESG000039247.1	-0.888656	8.47371e-07	5.40575e-05	Down	RAD50	XP_012800226.1 DNA repair protein RAD50, partial [Schistosoma haematobium]
SMESG000039343.1	-2.14551	0.0107153	0.0890895	Down	--	XP_022798874.1 uncharacterized protein LOC111336948 [Stylophora pistillata]
SMESG000040439.1	-1.06374	0.00175624	0.0241453	Down	EIF4G3	PAA87383.1 hypothetical protein BOX15_Mlig013413g2 [Macrostomum lignano]
SMESG000040849.1	-1.01789	3.6628e-11	8.92939e-09	Down	slc52a3a	XP_023691021.1 solute carrier family 52, riboflavin transporter, member 3 [Paramormyrops kingsleyae]
SMESG000041448.1	-1.0033	5.73522e-10	1.08746e-07	Down	--	AFJ24815.1 low density lipoprotein receptor related-2, partial [Schmidtea mediterranea]
SMESG000042091.1	1.0436	3.35583e-19	3.52414e-16	Up	Slc6a7	AKN21425.1 slc6a-5 [Schmidtea mediterranea]
SMESG000042765.1	-1.13975	3.24323e-05	0.00103209	Down	--	-
SMESG000043445.1	-0.943974	5.96985e-07	4.11618e-05	Down	--	-
SMESG000044678.1	1.12471	1.11976e-18	8.99749e-16	Up	MPEG1	XP_015766206.1 PREDICTED: LOW QUALITY PROTEIN: macrophage-expressed gene 1 protein-like [Acropora digitifera]
SMESG000044680.1	1.29021	3.86526e-06	0.000180714	Up	MPEG1	RMX43816.1 hypothetical protein pdam_00017055 [Pocillopora damicornis]
SMESG000046560.1	-0.870902	0.000543922	0.00998176	Down	--	-
SMESG000046592.1	-0.821868	8.92022e-06	0.000358173	Down	OFD1	AFB74720.1 OFD1, partial [Schmidtea mediterranea]
SMESG000047829.1	-1.75087	1.16802e-07	1.02217e-05	Down	Sbno1	RWS02043.1 Protein strawberry notch-like protein [Dinothrombium tinctorium]
SMESG000048287.1	-0.990787	1.65893e-16	1.13238e-13	Down	--	-
SMESG000049079.1	-0.954803	0.000172114	0.00398255	Down	kri1	XP_013106578.1 PREDICTED: protein KRI1 homolog [Stomoxys calcitrans]
SMESG000049418.1	-0.913482	1.29139e-07	1.12294e-05	Down	--	PAA90357.1 hypothetical protein BOX15_Mlig003676g1, partial [Macrostomum lignano]
SMESG000049767.1	-1.02077	0.0090381	0.0791457	Down	--	AFJ24792.1 TNF receptor associated factor-2, partial [Schmidtea mediterranea]
SMESG000050427.1	-1.40261	1.17582e-12	3.91519e-10	Down	--	XP_001628947.2 proliferation marker protein Ki-67 [Nematostella vectensis]
SMESG000050428.1	-0.960051	0.0107577	0.089225	Down	cher	TPP66480.1 Filamin-A [Fasciola gigantica]
SMESG000051914.1	0.824703	8.74671e-08	8.0141e-06	Up	--	-
SMESG000052799.1	-0.822534	0.00261271	0.0332111	Down	--	XP_014768323.1 PREDICTED: myosin-2 heavy chain-like [Octopus bimaculoides]
SMESG000053698.1	-0.809631	0.00512673	0.0533461	Down	CLEC3B	AAL29940.1 lectin 1, partial [Girardia tigrina]
SMESG000054245.1	0.882858	0.000397658	0.00775547	Up	SPCC4F11.04c	PAA75775.1 hypothetical protein BOX15_Mlig017105g1 [Macrostomum lignano]
SMESG000054494.1	-0.915301	6.13489e-12	1.70926e-09	Down	--	-
SMESG000054507.1	-0.943575	1.16452e-05	0.000449095	Down	--	-
SMESG000054674.1	-0.876311	0.00237653	0.0310473	Down	--	-
SMESG000054751.1	0.935984	0.0050928	0.0530737	Up	NICN1	XP_025106153.1 nicolin-1-like isoform X8 [Pomacea canaliculata]
SMESG000055797.1	2.08975	1.29025e-05	0.000490654	Up	PI16	AFJ24739.1 GLI pathogenesis related-1, partial [Schmidtea mediterranea]
SMESG000056252.1	-0.875406	0.0100714	0.0850178	Down	Srrm2	XP_009175336.1 hypothetical protein T265_15216, partial [Opisthorchis viverrini]
SMESG000056307.1	1.11819	0.00285867	0.0353822	Up	INPP5J	XP_012792504.1 Type II inositol 1,4,5-trisphosphate 5-phosphatase [Schistosoma haematobium]
SMESG000056346.1	-0.818269	2.73243e-18	2.07239e-15	Down	--	-
SMESG000057564.1	-0.840597	9.55872e-12	2.50953e-09	Down	PSIP1	XP_018648744.1 putative hepatoma derived growth factor [Schistosoma mansoni]
SMESG000057720.1	1.65503	2.48896e-09	3.95108e-07	Up	--	-
SMESG000058003.1	1.0365	0.000349779	0.00705344	Up	ACT1	KAA3676143.1 actin beta/gamma 1 [Paragonimus westermani]
SMESG000058130.1	-0.849746	0.000957444	0.0155422	Down	--	-
SMESG000058546.1	1.58616	1.14891e-15	7.12949e-13	Up	--	-
SMESG000059631.1	0.895638	0.00442851	0.0484595	Up	--	-
SMESG000060010.1	-0.828112	0.00258032	0.0328912	Down	PARP2	XP_006818261.1 PREDICTED: poly [ADP-ribose] polymerase 2-like [Saccoglossus kowalevskii]
SMESG000060356.1	-0.865048	0.00936556	0.0811801	Down	aurka-a	XP_015918512.1 aurora kinase C-like [Parasteatoda tepidariorum]
SMESG000061808.1	1.67166	3.11164e-06	0.000151175	Up	pim2	AVM18990.1 PIM-1-like protein [Schmidtea mediterranea]
SMESG000061926.1	-1.03898	1.35319e-06	7.90276e-05	Down	--	XP_012266027.1 chromatin assembly factor 1 subunit A isoform X1 [Athalia rosae]
SMESG000062594.1	-0.885256	1.60321e-06	9.00701e-05	Down	crn-7	VDM21453.1 unnamed protein product [Wuchereria bancrofti]
SMESG000062718.1	0.920692	0.00438261	0.0483291	Up	--	XP_009172576.1 hypothetical protein T265_08498 [Opisthorchis viverrini]
SMESG000062953.1	-0.875779	1.22064e-06	7.34107e-05	Down	CCDC186	XP_020630070.1 coiled-coil domain-containing protein 186-like [Orbicella faveolata]
SMESG000063031.1	-0.827936	1.88398e-10	4.08255e-08	Down	--	RTG86004.1 uncharacterized protein DC041_0011500 [Schistosoma bovis]
SMESG000063454.1	0.865358	0.000568392	0.0103533	Up	--	AFJ24867.1 peptidoglycan recognition protein-1 [Schmidtea mediterranea]
SMESG000063471.1	2.9582	3.78978e-65	1.7246e-61	Up	Cp1	PAV61346.1 hypothetical protein WR25_18197 [Diploscapter pachys]
SMESG000063517.1	1.99789	6.67586e-15	3.28005e-12	Up	Cp1	PAA54736.1 hypothetical protein BOX15_Mlig002369g2 [Macrostomum lignano]
SMESG000064024.1	1.07867	1.12595e-05	0.000437934	Up	--	-
SMESG000064034.1	-3.09848	7.86796e-76	5.37067e-72	Down	MBD2	AHB82104.1 methyl-CpG binding domain 2/3 [Schmidtea mediterranea]
SMESG000064239.1	-0.932926	0.00033465	0.00679858	Down	C19orf44	XP_032217765.1 uncharacterized protein C19orf44 isoform X2 [Nematostella vectensis]
SMESG000065696.1	-0.91974	0.000306566	0.0063509	Down	--	-
SMESG000065719.1	-0.834558	7.78321e-08	7.34583e-06	Down	--	KAA3673760.1 nucleoprotein TPR [Paragonimus westermani]
SMESG000066093.1	-0.972681	0.000287324	0.00602541	Down	PSMD6	CDS28066.1 tubulin polyglutamylase ttll4 [Hymenolepis microstoma]
SMESG000066258.1	0.819913	0.0112541	0.0918358	Up	Pi16	CDS29748.1 hypothetical protein HmN_000895800 [Hymenolepis microstoma]
SMESG000066596.1	1.27605	2.54458e-13	9.14173e-11	Up	--	-
SMESG000066647.1	0.857136	0.00685729	0.0657875	Up	--	VZI20987.1 unnamed protein product [Sparganum proliferum]
SMESG000066997.1	1.04606	0.00323554	0.0385778	Up	--	ARM37835.1 synaptotagmin XV-like protein [Schmidtea mediterranea]
SMESG000067108.1	-0.939152	5.74911e-08	5.75705e-06	Down	--	-
SMESG000067788.1	1.20017	0.000998378	0.016054	Up	--	-
SMESG000067906.1	1.77162	7.15159e-14	2.78953e-11	Up	his-48	AFJ24860.1 histone h2b-2, partial [Schmidtea mediterranea]
SMESG000068583.1	1.00804	0.00358096	0.0415355	Up	--	-
SMESG000068743.1	-1.51892	0.000778121	0.0132455	Down	--	AIX99543.1 pmp-10, partial [Schmidtea mediterranea]
SMESG000068877.1	-0.885004	2.91101e-08	3.31459e-06	Down	ELOVL	XP_011445953.1 PREDICTED: elongation of very long chain fatty acids protein 7 [Crassostrea gigas]
SMESG000069110.1	-0.82375	0.00779729	0.0718276	Down	--	PAA49411.1 hypothetical protein BOX15_Mlig019187g1 [Macrostomum lignano]
SMESG000069149.1	-1.43523	0.00131955	0.019839	Down	--	-
SMESG000069796.1	-0.81773	2.07797e-06	0.00011099	Down	--	-
SMESG000070491.1	-1.19954	6.68928e-12	1.82644e-09	Down	--	XP_019630926.1 PREDICTED: Williams-Beuren syndrome chromosomal region 27 protein-like [Branchiostoma belcheri]
SMESG000070747.1	0.902125	0.00341392	0.0400402	Up	--	-
SMESG000071050.1	0.850887	0.0117537	0.0945562	Up	--	-
SMESG000071424.1	-0.854226	0.00850118	0.0761536	Down	NIT2	XP_030762381.1 omega-amidase NIT2 [Sitophilus oryzae]
SMESG000071556.1	1.27901	0.000370896	0.00738115	Up	--	XP_029655089.1 innexin unc-7-like [Octopus vulgaris]
SMESG000072483.1	-1.19652	1.85668e-14	7.68104e-12	Down	--	-
SMESG000072520.1	1.02397	1.154e-05	0.000446302	Up	DHRS11	NP_001002143.2 dehydrogenase/reductase SDR family member 11b [Danio rerio]
SMESG000073407.1	0.923711	1.90787e-05	0.000669568	Up	DNAH10	VDD74852.1 unnamed protein product [Mesocestoides corti]
SMESG000073414.1	1.05126	0.000155266	0.00365111	Up	DNAH10	VZI19223.1 unnamed protein product [Sparganum proliferum]
SMESG000073666.1	-1.01204	8.25682e-06	0.000334487	Down	VWF	XP_022332232.1 apolipophorins-like [Crassostrea virginica]
SMESG000073774.1	-0.917946	2.80903e-05	0.000913068	Down	--	AIW60887.1 transverse filament protein SYCP-1 [Schmidtea mediterranea]
SMESG000074007.1	1.56694	3.58668e-06	0.000170019	Up	Rap1	XP_011662785.1 GTP-binding protein Di-Ras2-like [Strongylocentrotus purpuratus]
SMESG000074545.1	-1.53399	2.45539e-81	3.35209e-77	Down	RPL23A	XP_032877814.1 60S ribosomal protein L23a [Amblyraja radiata]
SMESG000074719.1	-0.926935	5.24353e-10	1.02264e-07	Down	--	-
SMESG000074740.1	-1.06985	0.00167982	0.0233771	Down	--	-
SMESG000074901.1	-0.863132	5.81653e-09	7.8621e-07	Down	--	-
SMESG000074907.1	-0.872077	5.85833e-06	0.000251891	Down	--	-
SMESG000074908.1	-0.875525	5.47896e-05	0.00158808	Down	--	-
SMESG000074910.1	-0.994792	1.08152e-07	9.58761e-06	Down	--	-
SMESG000075212.1	-0.888193	1.14063e-10	2.59531e-08	Down	--	-
SMESG000076927.1	-1.3499	0.000338742	0.00687148	Down	--	-
SMESG000077491.1	-1.10889	8.89652e-15	4.04851e-12	Down	Acmsd	XP_021377118.1 2-amino-3-carboxymuconate-6-semialdehyde decarboxylase-like isoform X1 [Mizuhopecten yessoensis]
SMESG000077659.1	1.9027	7.5805e-10	1.3985e-07	Up	DUR3	XP_009065706.1 hypothetical protein LOTGIDRAFT_169159 [Lottia gigantea]
SMESG000078658.1	-0.89626	0.00134095	0.0200951	Down	chmp5	VDD90686.1 unnamed protein product [Enterobius vermicularis]
SMESG000078995.1	-0.875338	0.0096723	0.0828395	Down	--	-
SMESG000079557.1	-1.23599	0.00320188	0.0382767	Down	--	-
SMESG000079712.1	-0.871848	1.44081e-10	3.17258e-08	Down	--	C0HKB8.1 RecName: Full=Acidic phospholipase A2; Short=MdumPLA2; Short=svPLA2; AltName: Full=Phosphatidylcholine 2-acylhydrolase [Micrurus dumerilii]
SMESG000080295.1	-0.987714	5.04014e-05	0.00148935	Down	SLC16A4	AKN21507.1 slc16a-12 [Schmidtea mediterranea]
SMESG000080367.1	1.45687	0.00054427	0.00998176	Up	--	PAA76062.1 hypothetical protein BOX15_Mlig017883g2, partial [Macrostomum lignano]
SMESG000080447.1	0.921547	0.00146705	0.0213519	Up	--	-
SMESG000081649.1	1.36647	4.69485e-09	6.81852e-07	Up	--	-
SMESG000081746.1	1.23548	0.000280606	0.00592092	Up	--	THD19475.1 hypothetical protein D915_009859 [Fasciola hepatica]

## Sheet: MBD2-3_15dpi_diff_gene
Transcriptome profiling at 15 dpi after depletion of MBD2/3
Gene_name	log2FoldChange	pvalue	padj	change	Symbol	Description
SMESG000000110.1	-1.60831	0.000869339	0.014318	Down	svopl	OAF72203.1 putative transporter SVOPL [Intoshia linei]
SMESG000000519.1	0.877932	0.00725089	0.0652337	Up	LARP6	VEL39022.1 unnamed protein product [Protopolystoma xenopodis]
SMESG000000556.1	0.852872	9.1388e-10	1.15727e-07	Up	SJCHGC01960	AWM96393.1 HSP10 [Dugesia japonica]
SMESG000000650.1	0.837816	0.000246909	0.00543322	Up	Srp14	XP_011412349.1 PREDICTED: signal recognition particle 14 kDa protein-like [Crassostrea gigas]
SMESG000000724.1	-1.22319	2.33363e-05	0.0007603	Down	--	PAA62967.1 hypothetical protein BOX15_Mlig026242g1 [Macrostomum lignano]
SMESG000000756.1	0.884761	0.00671468	0.0622023	Up	--	KAA0187697.1 Mitochondrial import inner membrane translocase subunit TIM9 [Fasciolopsis buski]
SMESG000000802.1	1.2515	1.88203e-07	1.29551e-05	Up	LACTB	AQT19774.1 hypothetical protein Smed-lactB [Schmidtea mediterranea]
SMESG000000960.1	2.66967	6.05707e-13	1.5942e-10	Up	--	AEI69697.1 EGR-like protein 1 [Schmidtea mediterranea]
SMESG000001227.1	1.16492	2.80286e-06	0.00013201	Up	GLIPR1L1	VUZ45558.1 unnamed protein product [Hymenolepis diminuta]
SMESG000001228.1	0.997756	3.07773e-05	0.000969775	Up	--	VUZ45558.1 unnamed protein product [Hymenolepis diminuta]
SMESG000001434.1	-0.870984	0.00329662	0.0378858	Down	--	XP_009066046.1 hypothetical protein LOTGIDRAFT_236732 [Lottia gigantea]
SMESG000001708.1	-1.20275	1.343e-08	1.30631e-06	Down	ALDH2	TGZ74088.1 hypothetical protein CRM22_001133 [Opisthorchis felineus]
SMESG000001727.1	-0.849879	1.61035e-05	0.000566525	Down	--	-
SMESG000001790.1	1.2273	2.15561e-05	0.000709186	Up	--	-
SMESG000001793.1	0.931937	0.000713058	0.0125444	Up	--	-
SMESG000001830.1	-0.890461	0.0108556	0.0855637	Down	Dnai1	TGZ57753.1 hypothetical protein CRM22_009831 [Opisthorchis felineus]
SMESG000001835.1	0.803177	0.012779	0.0944563	Up	--	XP_021924395.1 WD repeat-containing protein 6 isoform X1 [Zootermopsis nevadensis]
SMESG000002033.1	-1.10105	0.00129728	0.0194345	Down	mx2	XP_020384628.1 LOW QUALITY PROTEIN: interferon-induced GTP-binding protein Mx3-like [Rhincodon typus]
SMESG000002124.1	-0.814282	0.000314092	0.00657732	Down	mx2	XP_007904885.1 PREDICTED: interferon-induced GTP-binding protein Mx-like isoform X2 [Callorhinchus milii]
SMESG000002152.1	0.945649	0.00287	0.0346127	Up	SPBC3D6.12	AHY82403.1 WD repeat-containing protein 3, partial [Schmidtea mediterranea]
SMESG000002694.1	-1.56125	3.79045e-09	4.2049e-07	Down	HAL	XP_002594930.1 hypothetical protein BRAFLDRAFT_209115 [Branchiostoma floridae]
SMESG000002858.1	1.6087	3.53028e-07	2.27822e-05	Up	--	XP_018645986.1 acid sensing ion channel 4, pituitary, putative [Schistosoma mansoni]
SMESG000003065.1	0.80058	0.00606605	0.0577889	Up	rad21	KAA0195248.1 Double-strand-break repair protein rad21 [Fasciolopsis buski]
SMESG000003087.1	-1.20317	8.23339e-25	1.57881e-21	Down	gst-3	AFJ24753.1 glutathione S transferase-1 [Schmidtea mediterranea]
SMESG000003328.1	1.04423	1.36294e-15	5.90153e-13	Up	--	AFJ24714.1 fos-1 [Schmidtea mediterranea]
SMESG000003402.1	2.14341	0.00162976	0.0230277	Up	Cyp2u1	AWM96409.1 cytochrome P450 2K1-like protein [Dugesia japonica]
SMESG000003551.1	1.21996	0.0133108	0.0971967	Up	--	-
SMESG000003701.1	1.1747	9.93141e-06	0.000388657	Up	--	XP_025016786.1 uncharacterized protein LOC112538932 [Tetranychus urticae]
SMESG000003824.1	0.801163	0.00491003	0.0498543	Up	--	CDS34628.2 hypothetical transcript [Hymenolepis microstoma]
SMESG000003831.1	-1.03629	2.83696e-05	0.00090025	Down	glnA	ELU18499.1 hypothetical protein CAPTEDRAFT_219831 [Capitella teleta]
SMESG000004091.1	0.856674	0.000371116	0.00750345	Up	Rpn8	XP_021358307.1 26S proteasome non-ATPase regulatory subunit 7-like [Mizuhopecten yessoensis]
SMESG000004195.1	1.54799	3.15625e-09	3.55831e-07	Up	--	-
SMESG000004196.1	1.13868	3.60359e-08	3.14097e-06	Up	--	-
SMESG000004332.1	-0.988253	2.40775e-05	0.000774484	Down	--	XP_013773512.1 NTF2-related export protein 1-like [Limulus polyphemus]
SMESG000004497.1	0.833661	0.000423447	0.00834644	Up	eif2s1	VEL33537.1 unnamed protein product [Protopolystoma xenopodis]
SMESG000004626.1	1.72204	5.72188e-08	4.68322e-06	Up	--	-
SMESG000004840.1	2.31601	1.21303e-13	3.97136e-11	Up	EGR4	AFJ24725.1 early growth response-2, partial [Schmidtea mediterranea]
SMESG000004927.1	-1.56038	2.28486e-17	1.2779e-14	Down	--	-
SMESG000004940.1	1.00344	0.000302601	0.00637648	Up	NUTF2	PAA57505.1 hypothetical protein BOX15_Mlig022657g2, partial [Macrostomum lignano]
SMESG000005006.1	2.90571	4.47927e-07	2.79652e-05	Up	--	-
SMESG000005037.1	0.873543	0.00611026	0.0579361	Up	alphaTub84D	BAK53867.1 tubulin alpha chain [Dugesia japonica]
SMESG000005130.1	1.46717	2.1132e-16	1.05057e-13	Up	--	AHD24754.1 X1.C.D3.1 [Schmidtea mediterranea]
SMESG000005286.1	1.06593	0.000171321	0.00404552	Up	DYNLL2	PAA56115.1 hypothetical protein BOX15_Mlig022175g1 [Macrostomum lignano]
SMESG000005474.1	-1.67041	1.3561e-08	1.30957e-06	Down	SLC47A1	AKN21701.1 slc47a-4, partial [Schmidtea mediterranea]
SMESG000005712.1	-1.17991	0.0121195	0.0911875	Down	Ace	AFJ24765.1 angiotensin converting enzyme-1, partial [Schmidtea mediterranea]
SMESG000005721.1	-0.807374	1.22981e-08	1.20495e-06	Down	PGD	NP_001006303.1 6-phosphogluconate dehydrogenase, decarboxylating [Gallus gallus]
SMESG000005759.1	2.21574	4.09863e-06	0.000183292	Up	--	AFJ24832.1 hypothetical protein, partial [Schmidtea mediterranea]
SMESG000005903.1	2.34582	1.90493e-09	2.29692e-07	Up	--	AFJ24832.1 hypothetical protein, partial [Schmidtea mediterranea]
SMESG000006014.1	1.09924	1.42691e-07	1.02975e-05	Up	PKM	PAA65922.1 hypothetical protein BOX15_Mlig019710g1, partial [Macrostomum lignano]
SMESG000006029.1	-0.93698	1.28403e-05	0.000468797	Down	--	XP_027206732.1 prolyl 4-hydroxylase subunit alpha-1-like [Penaeus vannamei]
SMESG000006139.1	-0.851507	2.45275e-05	0.000783886	Down	--	-
SMESG000006604.1	0.856946	0.00720551	0.0651249	Up	aurkb-b	AFJ24782.1 aurora kinase-1 [Schmidtea mediterranea]
SMESG000006666.1	1.3345	0.000259413	0.00566195	Up	--	-
SMESG000007013.1	1.98631	3.88077e-05	0.0011866	Up	--	XP_022335585.1 tripartite motif-containing protein 2-like [Crassostrea virginica]
SMESG000007159.1	-1.00399	9.18858e-07	5.1606e-05	Down	--	-
SMESG000007315.1	-1.76042	1.41926e-12	3.52792e-10	Down	--	-
SMESG000007684.1	1.00071	9.15679e-05	0.00239594	Up	--	KAE9546932.1 hypothetical protein FO519_009856, partial [Halicephalobus sp. NKZ332]
SMESG000007998.1	2.55478	8.47252e-13	2.14579e-10	Up	--	-
SMESG000008042.1	-1.78695	1.93672e-20	1.8569e-17	Down	--	PAA59456.1 hypothetical protein BOX15_Mlig034563g2 [Macrostomum lignano]
SMESG000008043.1	-0.964983	8.20996e-11	1.39497e-08	Down	--	PAA47666.1 hypothetical protein BOX15_Mlig027093g2, partial [Macrostomum lignano]
SMESG000008282.1	-1.02754	9.53607e-06	0.000377327	Down	--	XP_013417118.1 leucine-rich repeat-containing protein 74B [Lingula anatina]
SMESG000008797.1	-1.29021	2.71497e-15	1.13885e-12	Down	w	PAA63095.1 hypothetical protein BOX15_Mlig012313g3 [Macrostomum lignano]
SMESG000008835.1	-0.907461	1.5791e-06	8.15239e-05	Down	--	AQT19797.1 hypothetical protein 12898, partial [Schmidtea mediterranea]
SMESG000008854.1	1.51848	1.1468e-05	0.000432401	Up	--	ANO39115.1 GCR160 [Schmidtea mediterranea]
SMESG000008865.1	0.992341	1.3356e-06	7.07519e-05	Up	--	-
SMESG000009032.1	-0.824211	1.10519e-05	0.000422648	Down	--	ADD84675.1 Smed-NDK-4, partial [Schmidtea mediterranea]
SMESG000009143.1	-1.26867	0.00320577	0.0372563	Down	--	AQT19796.1 hypothetical protein 9223 [Schmidtea mediterranea]
SMESG000009144.1	-1.82031	8.33838e-06	0.000333113	Down	--	AQT19796.1 hypothetical protein 9223 [Schmidtea mediterranea]
SMESG000009419.1	-0.808079	7.30292e-08	5.73258e-06	Down	--	-
SMESG000009428.1	0.918565	0.000725245	0.0126359	Up	SEM1	THD27275.1 Split hand/foot malformation [Fasciola hepatica]
SMESG000009490.1	-0.825601	0.00268981	0.0332461	Down	--	-
SMESG000009654.1	-1.32409	1.16901e-10	1.91361e-08	Down	ELOVL4	XP_009061055.1 hypothetical protein LOTGIDRAFT_165788 [Lottia gigantea]
SMESG000009665.1	-1.03335	8.07348e-08	6.22818e-06	Down	ELOVL	XP_029644480.1 elongation of very long chain fatty acids protein AAEL008004-like [Octopus vulgaris]
SMESG000009674.1	-1.59029	2.23745e-05	0.000732521	Down	RDH13	XP_017107897.1 PREDICTED: retinol dehydrogenase 12-like [Drosophila bipectinata]
SMESG000009874.1	2.72212	1.10008e-11	2.38167e-09	Up	--	KAA0197228.1 Alpha-tocopherol transfer protein [Fasciolopsis buski]
SMESG000009878.1	-0.949892	0.0133901	0.0974435	Down	--	KAA0197228.1 Alpha-tocopherol transfer protein [Fasciolopsis buski]
SMESG000009883.1	0.908092	0.000265042	0.005732	Up	--	XP_008482417.1 ankyrin repeat and zinc finger domain-containing protein 1 [Diaphorina citri]
SMESG000009888.1	-0.899532	0.0102596	0.0828138	Down	--	CDS35534.1 expressed protein [Echinococcus multilocularis]
SMESG000009904.1	-1.33198	2.00824e-05	0.000673914	Down	Slc6a6	AKN21422.1 slc6a-2 [Schmidtea mediterranea]
SMESG000010034.1	1.33292	0.00397839	0.0430314	Up	--	-
SMESG000010122.1	0.986253	0.000372987	0.00750615	Up	Tmem86a	XP_019639843.1 PREDICTED: LOW QUALITY PROTEIN: lysoplasmalogenase-like protein TMEM86A [Branchiostoma belcheri]
SMESG000010290.1	1.06671	0.0015831	0.0225106	Up	--	-
SMESG000010475.1	-0.884102	0.00608744	0.0578695	Down	--	-
SMESG000010599.1	-1.07029	8.80025e-07	4.98421e-05	Down	--	-
SMESG000010604.1	-0.87169	0.00135737	0.0200507	Down	--	-
SMESG000010665.1	1.86041	7.34456e-14	2.59437e-11	Up	--	KAA0188900.1 hypothetical protein FBUS_02218 [Fasciolopsis buski]
SMESG000010795.1	1.40388	2.88059e-05	0.000911939	Up	P2RX4	VDN99122.1 unnamed protein product [Rodentolepis nana]
SMESG000010967.1	-1.01302	0.000288894	0.00613579	Down	--	-
SMESG000011033.1	1.29786	0.0023127	0.0301259	Up	--	-
SMESG000011051.1	1.93439	0.000141016	0.00345412	Up	H4-I	XP_033116238.1 uncharacterized protein LOC117116331 [Anneissia japonica]
SMESG000011194.1	1.78588	3.91607e-07	2.50311e-05	Up	--	-
SMESG000011215.1	2.06278	2.37419e-09	2.7572e-07	Up	--	-
SMESG000011257.1	0.831141	0.007202	0.0651249	Up	RABGGTA	AWM96390.1 GGT [Dugesia japonica]
SMESG000011270.1	1.22587	0.00148922	0.0214713	Up	--	-
SMESG000011558.1	0.988265	4.78911e-05	0.00138881	Up	--	-
SMESG000011657.1	-0.904645	4.04583e-05	0.00121765	Down	PRPF6	VUZ43828.1 unnamed protein product [Hymenolepis diminuta]
SMESG000011680.1	-0.976891	1.81279e-08	1.65531e-06	Down	ABHD4	XP_014768281.1 PREDICTED: abhydrolase domain-containing protein 4-like isoform X2 [Octopus bimaculoides]
SMESG000011690.1	-0.832283	1.12156e-05	0.000427691	Down	Abhd4	NP_001017287.1 (Lyso)-N-acylphosphatidylethanolamine lipase [Xenopus tropicalis]
SMESG000011846.1	1.04475	0.000887036	0.0145558	Up	SPAC17G8.11c	PAA52406.1 hypothetical protein BOX15_Mlig010228g2 [Macrostomum lignano]
SMESG000011859.1	0.981403	1.72094e-05	0.000598449	Up	--	-
SMESG000012063.1	-1.32287	2.08878e-13	5.84118e-11	Down	--	ARX11409.1 low density lipoprotein receptor-related 1, partial [Schmidtea mediterranea]
SMESG000012127.1	1.98575	1.45095e-08	1.37156e-06	Up	sepA	Q8T2I8.1 RecName: Full=Serine/threonine-protein kinase sepA; AltName: Full=Septase A [Dictyostelium discoideum]
SMESG000012131.1	3.09994	0.00475649	0.0487749	Up	sepA	Q8T2I8.1 RecName: Full=Serine/threonine-protein kinase sepA; AltName: Full=Septase A [Dictyostelium discoideum]
SMESG000012339.1	-0.992374	0.0126583	0.0937687	Down	--	AYA22141.1 TNF receptor-associated factor 3 [Mytilus coruscus]
SMESG000012534.1	-1.36633	0.000543558	0.0101336	Down	CYP1A1	XP_019642124.1 PREDICTED: cytochrome P450 1A1-like [Branchiostoma belcheri]
SMESG000012702.1	-0.882051	0.00226304	0.0296069	Down	--	AFJ24810.1 hypothetical protein, partial [Schmidtea mediterranea]
SMESG000012748.1	0.895095	0.00474636	0.0487082	Up	--	ANO39112.1 GCR157 [Schmidtea mediterranea]
SMESG000012909.1	-0.813873	0.000264413	0.005732	Down	SGSM3	XP_014783465.1 PREDICTED: small G protein signaling modulator 3 homolog isoform X4 [Octopus bimaculoides]
SMESG000013161.1	1.02741	0.00559556	0.0549848	Up	--	-
SMESG000013908.1	0.844159	0.000806475	0.0136517	Up	--	-
SMESG000013915.1	0.810885	0.000342623	0.00708634	Up	TFPI	XP_031550075.1 carboxypeptidase inhibitor SmCI-like [Actinia tenebrosa]
SMESG000014373.1	1.05178	0.00323349	0.0374487	Up	TMBIM1	PAA73406.1 hypothetical protein BOX15_Mlig028790g2 [Macrostomum lignano]
SMESG000014399.1	-0.991859	1.45241e-05	0.000518502	Down	--	OMJ70210.1 hypothetical protein SteCoe_31865 [Stentor coeruleus]
SMESG000014523.1	-1.48528	3.23147e-13	8.85226e-11	Down	--	-
SMESG000014544.1	-1.34552	2.09837e-06	0.000103935	Down	--	-
SMESG000014554.1	-2.02612	1.68963e-07	1.19368e-05	Down	--	-
SMESG000014578.1	-1.22574	1.32848e-06	7.07519e-05	Down	--	-
SMESG000014711.1	-2.11924	3.48435e-24	5.19671e-21	Down	--	-
SMESG000014730.1	-1.39636	9.96119e-06	0.000388689	Down	TRAF3	AFJ24792.1 TNF receptor associated factor-2, partial [Schmidtea mediterranea]
SMESG000014759.1	1.02094	0.0121123	0.0911875	Up	Marf	XP_019894310.1 PREDICTED: transmembrane GTPase Marf isoform X3 [Musca domestica]
SMESG000014761.1	0.91486	0.00454573	0.047154	Up	--	KFM65406.1 Transmembrane GTPase Marf, partial [Stegodyphus mimosarum]
SMESG000015004.1	0.983864	0.00997661	0.0815394	Up	--	-
SMESG000015015.1	0.821806	0.00314443	0.0367659	Up	NSD1	AFD29602.1 NSD-1 [Schmidtea mediterranea]
SMESG000015089.1	-1.18083	0.00697366	0.0636052	Down	--	XP_027234400.1 uncharacterized protein LOC113825766 [Penaeus vannamei]
SMESG000015191.1	0.993766	0.0058503	0.0566993	Up	TUBA1B	XP_006974484.1 PREDICTED: tubulin alpha-1A chain-like [Peromyscus maniculatus bairdii]
SMESG000015197.1	0.809195	0.0111054	0.0866673	Up	--	PAA67873.1 hypothetical protein BOX15_Mlig008908g1 [Macrostomum lignano]
SMESG000015241.1	0.923114	0.0052171	0.0522817	Up	odc1-a	XP_005095259.1 PREDICTED: ornithine decarboxylase-like [Aplysia californica]
SMESG000015319.1	-0.904034	0.00106103	0.0167957	Down	--	PAA62266.1 hypothetical protein BOX15_Mlig022417g1 [Macrostomum lignano]
SMESG000015387.1	-0.850519	0.00824297	0.0714711	Down	--	XP_012942420.1 PREDICTED: uncharacterized protein LOC101845869 [Aplysia californica]
SMESG000015831.1	-0.850081	3.88994e-08	3.32578e-06	Down	SRC	THD23481.1 Proto-oncogene tyrosine-protein kinase Yrk [Fasciola hepatica]
SMESG000016079.1	1.5237	0.000164861	0.00394461	Up	sta	RWS20872.1 putative ribosomal protein SA-like protein [Leptotrombidium deliense]
SMESG000016088.1	-1.43469	1.52133e-13	4.53795e-11	Down	PRSS12	PAA71212.1 hypothetical protein BOX15_Mlig019787g1 [Macrostomum lignano]
SMESG000016089.1	-1.27647	5.15588e-07	3.16016e-05	Down	PRSS12	PAA71212.1 hypothetical protein BOX15_Mlig019787g1 [Macrostomum lignano]
SMESG000016252.1	-0.829554	0.00243762	0.0310438	Down	mtap	XP_021359797.1 S-methyl-5'-thioadenosine phosphorylase-like [Mizuhopecten yessoensis]
SMESG000016261.1	-1.27722	6.71284e-08	5.36348e-06	Down	Gucy1b2	QFQ66871.1 gucy1b2 protein [Schmidtea mediterranea]
SMESG000016293.1	-1.02498	0.000165766	0.00395922	Down	--	-
SMESG000016297.1	-1.15103	5.44659e-10	7.53707e-08	Down	Best2	PAA75942.1 hypothetical protein BOX15_Mlig030079g1 [Macrostomum lignano]
SMESG000016305.1	4.91753	5.32587e-07	3.24951e-05	Up	--	-
SMESG000016362.1	-0.815282	0.00288285	0.0347053	Down	Traf4	PAA62246.1 hypothetical protein BOX15_Mlig027678g1 [Macrostomum lignano]
SMESG000016405.1	-1.21618	0.000215672	0.00488191	Down	twk-18	AIX99544.1 kcnka, partial [Schmidtea mediterranea]
SMESG000016412.1	0.964975	5.77187e-07	3.45874e-05	Up	slc25a30	AKN21592.1 slc25a-24 [Schmidtea mediterranea]
SMESG000016714.1	1.52692	4.98155e-15	1.96669e-12	Up	--	ANO39112.1 GCR157 [Schmidtea mediterranea]
SMESG000016757.1	1.4396	8.77746e-09	9.06307e-07	Up	--	-
SMESG000016772.1	1.19337	5.98516e-06	0.000252638	Up	--	-
SMESG000016777.1	0.915937	1.56179e-05	0.000553136	Up	--	-
SMESG000016778.1	1.14301	0.0010624	0.0167957	Up	--	-
SMESG000016780.1	1.44827	1.20611e-05	0.000449711	Up	--	-
SMESG000016782.1	2.0285	2.58147e-06	0.000122011	Up	--	-
SMESG000016810.1	1.72986	4.66138e-08	3.88632e-06	Up	--	-
SMESG000016925.1	-1.19303	1.25767e-05	0.00046506	Down	--	-
SMESG000017013.1	-1.98216	1.11004e-13	3.72502e-11	Down	--	-
SMESG000017142.1	-1.014	0.00253821	0.0320211	Down	Nucb2	ASK86275.1 nucleobindin nesfatin precursor, partial [Ophionotus victoriae]
SMESG000017181.1	0.864514	0.00157331	0.0224188	Up	--	-
SMESG000017203.1	-0.844182	0.000218063	0.00492522	Down	--	VDN98900.1 unnamed protein product [Rodentolepis nana]
SMESG000017214.1	-0.914441	4.03809e-06	0.000181282	Down	--	KAA3676080.1 uncharacterized protein DEA37_0012169 [Paragonimus westermani]
SMESG000017389.1	1.3438	0.00166168	0.0233069	Up	GLIPR1L1	AFJ24739.1 GLI pathogenesis related-1, partial [Schmidtea mediterranea]
SMESG000017486.1	-0.910064	2.03002e-07	1.3832e-05	Down	Helz2	XP_009062598.1 hypothetical protein LOTGIDRAFT_166880 [Lottia gigantea]
SMESG000017519.1	-0.915125	6.46363e-05	0.00177847	Down	--	XP_013080792.1 PREDICTED: microtubule-actin cross-linking factor 1-like isoform X1 [Biomphalaria glabrata]
SMESG000017801.1	1.02736	1.40398e-05	0.000503894	Up	--	-
SMESG000017894.1	-0.859917	1.89402e-05	0.000645263	Down	ACHE	GAA53463.1 acetylcholinesterase [Clonorchis sinensis]
SMESG000017936.1	1.11506	0.000413685	0.00817806	Up	TUBA1A	XP_009051687.1 hypothetical protein LOTGIDRAFT_181858 [Lottia gigantea]
SMESG000017953.1	-1.35409	2.96072e-11	5.51969e-09	Down	FLOT2	PAA57551.1 hypothetical protein BOX15_Mlig021811g2 [Macrostomum lignano]
SMESG000018025.1	1.538	6.51734e-05	0.00178535	Up	--	-
SMESG000018042.1	-1.70195	0.000201094	0.00460629	Down	oxlT	AKN21500.1 slc16a-5, partial [Schmidtea mediterranea]
SMESG000018052.1	-1.13531	0.0106145	0.0847583	Down	tctex1d1-b	XP_013403350.1 tctex1 domain-containing protein 2-like [Lingula anatina]
SMESG000018135.1	-0.918777	0.00426167	0.0452566	Down	--	-
SMESG000018404.1	1.44714	2.72992e-09	3.1054e-07	Up	TRAF5	ADF47430.1 TNF receptor-associated factor-2-like protein B [Dugesia japonica]
SMESG000018453.1	2.39643	7.46337e-07	4.30356e-05	Up	Plg	AFJ24868.1 plasminogen-1, partial [Schmidtea mediterranea]
SMESG000018656.1	1.02647	9.91433e-05	0.00255923	Up	--	AGG22603.1 protection of telomere 1-like protein [Schmidtea mediterranea]
SMESG000018666.1	1.14472	0.000296158	0.00627024	Up	BOLL	ANE21796.1 boule 1 RNA-binding protein [Schmidtea mediterranea]
SMESG000019381.1	-0.94403	1.44688e-08	1.37156e-06	Down	Fkbp15	XP_028312149.1 FK506-binding protein 15 isoform X3 [Gouania willdenowi]
SMESG000019966.1	-0.864775	0.00445072	0.046637	Down	--	-
SMESG000020022.1	1.08921	0.0138151	0.0992541	Up	--	ELU14544.1 hypothetical protein CAPTEDRAFT_114139 [Capitella teleta]
SMESG000020074.1	0.980698	0.00286274	0.0346007	Up	--	-
SMESG000020135.1	-1.11685	1.3534e-10	2.18875e-08	Down	Traf3	XP_032903252.1 TNF receptor-associated factor 2-like [Amblyraja radiata]
SMESG000020144.1	0.820823	0.00080055	0.0136023	Up	--	-
SMESG000020709.1	1.00319	0.00884388	0.0751717	Up	Trpc2	PAA54089.1 hypothetical protein BOX15_Mlig025367g1 [Macrostomum lignano]
SMESG000020729.1	0.927396	0.000660391	0.0118508	Up	--	-
SMESG000020865.1	-0.816944	0.00147423	0.0213239	Down	--	RXM32455.1 Protein disulfide-isomerase [Acipenser ruthenus]
SMESG000020904.1	-1.47148	2.35206e-11	4.51024e-09	Down	SLC25A10	AKN21587.1 slc25a-19 [Schmidtea mediterranea]
SMESG000020955.1	-1.00872	1.0846e-07	8.11038e-06	Down	--	VDQ11758.1 unnamed protein product [Trichobilharzia regenti]
SMESG000021239.1	1.21459	0.00290339	0.0348277	Up	SNIP1	RCN50329.1 FHA domain protein [Ancylostoma caninum]
SMESG000021419.1	-0.949992	0.001013	0.0162261	Down	Mogat2	XP_011426483.1 PREDICTED: 2-acylglycerol O-acyltransferase 2-A [Crassostrea gigas]
SMESG000021878.1	-2.22697	2.67651e-07	1.75491e-05	Down	--	-
SMESG000021964.1	1.4754	0.000301476	0.00637277	Up	--	-
SMESG000022049.1	-1.76429	5.34955e-05	0.00151812	Down	--	-
SMESG000022051.1	-1.05136	3.96463e-16	1.83508e-13	Down	ada	XP_013390246.2 adenosine deaminase-like isoform X1 [Lingula anatina]
SMESG000022100.1	-1.13503	0.000357839	0.00733324	Down	CYP2B11	AWM96409.1 cytochrome P450 2K1-like protein [Dugesia japonica]
SMESG000022206.1	-0.800013	2.12129e-05	0.000703065	Down	GLDC	XP_013403032.1 glycine dehydrogenase (decarboxylating), mitochondrial isoform X1 [Lingula anatina]
SMESG000022278.1	-1.17285	0.0017065	0.0237864	Down	Trhde	AFJ24858.1 hypothetical protein, partial [Schmidtea mediterranea]
SMESG000022279.1	-1.348	0.00045661	0.00885704	Down	ANPEP	AFJ24858.1 hypothetical protein, partial [Schmidtea mediterranea]
SMESG000022377.1	-1.17912	1.20105e-06	6.49849e-05	Down	--	PAA91517.1 hypothetical protein BOX15_Mlig006934g1 [Macrostomum lignano]
SMESG000022444.1	0.85124	0.000723744	0.0126359	Up	nrv2	XP_009176413.1 hypothetical protein T265_11482 [Opisthorchis viverrini]
SMESG000022450.1	1.08702	0.00614725	0.0581402	Up	nkb-1	RJW73569.1 Sodium/potassium-transporting ATPase subunit beta-1 [Clonorchis sinensis]
SMESG000022577.1	1.04329	6.28733e-10	8.43949e-08	Up	Thsd7a	RTG89782.1 uncharacterized protein DC041_0003935 [Schistosoma bovis]
SMESG000022736.1	1.09131	0.00121383	0.0185362	Up	--	-
SMESG000022742.1	1.21945	1.29892e-05	0.000472505	Up	--	-
SMESG000022750.1	-0.824303	1.08241e-05	0.000416311	Down	--	ANP44407.1 epidermal growth factor Smed-egf-2 [Schmidtea mediterranea]
SMESG000022843.1	0.85866	7.72716e-06	0.000312415	Up	--	-
SMESG000022978.1	-0.993547	2.42693e-06	0.000115931	Down	KCNQ1	ELU04696.1 hypothetical protein CAPTEDRAFT_111874 [Capitella teleta]
SMESG000022995.1	-0.990622	0.00487267	0.0496628	Down	--	AGS83418.1 asic [Schmidtea mediterranea]
SMESG000023011.1	0.828676	0.0137782	0.0992195	Up	--	-
SMESG000023216.1	-0.850562	0.00234715	0.030411	Down	--	-
SMESG000023242.1	-1.02554	0.00425444	0.0452453	Down	nAChRalpha1	PAV91319.1 hypothetical protein WR25_21905 [Diploscapter pachys]
SMESG000023353.1	1.4271	1.0866e-06	5.97766e-05	Up	AGAP008842	BAR87948.1 aquaporin [Dugesia japonica]
SMESG000023359.1	-0.939331	4.44166e-08	3.72627e-06	Down	slc38a7	AKN21660.1 slc38a-1 [Schmidtea mediterranea]
SMESG000023528.1	-1.82649	3.50971e-05	0.00109306	Down	CYP2U1	PAA79583.1 hypothetical protein BOX15_Mlig006662g3 [Macrostomum lignano]
SMESG000023585.1	0.878544	0.00203041	0.0272269	Up	PRADC1	XP_012794961.1 Protease-associated domain-containing protein 1 [Schistosoma haematobium]
SMESG000023590.1	1.42792	0.00275899	0.0337592	Up	CDK1	AAW26946.1 SJCHGC05810 protein [Schistosoma japonicum]
SMESG000023662.1	-0.876547	0.000478324	0.00917221	Down	--	AWV63261.1 tgs-1 [Schmidtea mediterranea]
SMESG000023836.1	0.874517	0.000137866	0.00339389	Up	--	PAA79049.1 hypothetical protein BOX15_Mlig011077g3 [Macrostomum lignano]
SMESG000023987.1	0.941043	0.000452325	0.00878663	Up	RPS19	VDN99777.1 unnamed protein product [Rodentolepis nana]
SMESG000024141.1	-1.19397	7.91854e-10	1.03195e-07	Down	--	-
SMESG000024479.1	-0.910079	1.45269e-11	3.04678e-09	Down	--	-
SMESG000024526.1	-0.827953	0.0103321	0.0832461	Down	Slc13a5	AKN21480.1 slc13a-1 [Schmidtea mediterranea]
SMESG000024647.1	0.83132	3.77175e-10	5.56354e-08	Up	--	XP_013417120.1 acid sphingomyelinase-like phosphodiesterase 3b isoform X2 [Lingula anatina]
SMESG000024663.1	1.10585	2.32214e-09	2.73422e-07	Up	--	XP_032782336.1 uncharacterized protein LOC116920275 [Daphnia magna]
SMESG000024669.1	-1.16567	0.0116169	0.0890544	Down	--	XP_028517423.1 uncharacterized protein LOC114575902 [Exaiptasia pallida]
SMESG000024670.1	-0.97921	7.34486e-05	0.0019718	Down	HMBS	CDS37641.1 porphobilinogen deaminase [Echinococcus multilocularis]
SMESG000024727.1	-0.955669	1.1211e-06	6.14224e-05	Down	--	VDK75410.1 unnamed protein product [Onchocerca ochengi]
SMESG000024739.1	-1.55964	8.46366e-13	2.14579e-10	Down	Acsl5	XP_013086264.1 PREDICTED: long-chain-fatty-acid--CoA ligase 1-like isoform X2 [Biomphalaria glabrata]
SMESG000024740.1	1.04265	0.00439127	0.0463397	Up	--	-
SMESG000024756.1	-1.27781	3.31495e-06	0.000153436	Down	--	XP_022344842.1 hydroxylysine kinase-like [Crassostrea virginica]
SMESG000024833.1	-0.934332	5.88148e-08	4.78468e-06	Down	INHBA	AGX01005.1 activin 1 [Schmidtea mediterranea]
SMESG000024834.1	-0.81999	0.00241469	0.030869	Down	--	-
SMESG000025034.1	1.01351	0.00588162	0.0569207	Up	Prss52	XP_019139510.2 transmembrane protease serine 7-like [Corvus cornix cornix]
SMESG000025064.1	0.927877	0.00135782	0.0200507	Up	nip7	XP_020796983.1 60S ribosome subunit biogenesis protein NIP7 homolog [Boleophthalmus pectinirostris]
SMESG000025072.1	0.890781	1.03638e-05	0.000399753	Up	HMBS	AVW80116.1 porphobilinogen deaminase [Dugesia japonica]
SMESG000025075.1	-1.24706	5.4806e-11	9.43155e-09	Down	miox	XP_013420799.1 inositol oxygenase [Lingula anatina]
SMESG000025307.1	0.825586	0.0046766	0.0482135	Up	OPN4	XP_019881013.1 PREDICTED: parapinopsin-like [Aethina tumida]
SMESG000025346.1	1.60628	0.000171489	0.00404552	Up	--	-
SMESG000025363.1	1.10275	1.02977e-05	0.000399283	Up	--	-
SMESG000025410.1	-2.30737	2.15811e-21	2.41402e-18	Down	--	-
SMESG000025482.1	1.30806	0.000173094	0.00406908	Up	--	XP_023231660.1 Krueppel-like factor 11 isoform X2 [Centruroides sculpturatus]
SMESG000025583.1	-0.996915	0.00841191	0.0724527	Down	--	AKG62131.1 TNF receptor associated factor 4, partial [Schmidtea mediterranea]
SMESG000025819.1	-1.13743	9.58568e-06	0.000377327	Down	1-Oct	AKN21549.1 slc22a-1 [Schmidtea mediterranea]
SMESG000025822.1	-1.8753	5.80018e-06	0.000246379	Down	1-Oct	AKN21549.1 slc22a-1 [Schmidtea mediterranea]
SMESG000026037.1	1.10561	5.49627e-06	0.000236463	Up	--	KAA0195950.1 putative N-acetyltransferase [Fasciolopsis buski]
SMESG000026673.1	1.04632	0.000368807	0.00749005	Up	Rab5if	XP_013118604.1 PREDICTED: uncharacterized protein C20orf24 homolog [Stomoxys calcitrans]
SMESG000026752.1	-1.11479	0.00237234	0.0306486	Down	--	-
SMESG000026791.1	0.84316	7.19819e-08	5.68361e-06	Up	--	ARX11413.1 estrella [Schmidtea mediterranea]
SMESG000026847.1	-1.04957	2.13094e-05	0.000703131	Down	Gnl2	XP_013420143.1 nucleolar GTP-binding protein 2 [Lingula anatina]
SMESG000027067.1	0.856414	0.00733098	0.0657779	Up	--	-
SMESG000027187.1	1.04553	0.00118196	0.0181527	Up	--	XP_018330991.1 A-kinase anchor protein 1, mitochondrial isoform X2 [Agrilus planipennis]
SMESG000027204.1	-1.2272	6.07411e-08	4.8822e-06	Down	acsbg2	XP_017307774.1 PREDICTED: long-chain-fatty-acid--CoA ligase ACSBG2-like [Ictalurus punctatus]
SMESG000027217.1	-0.814496	4.41046e-05	0.00130722	Down	acsbg2	XP_008334164.1 long-chain-fatty-acid--CoA ligase ACSBG2-like [Cynoglossus semilaevis]
SMESG000027312.1	0.987008	0.000109192	0.00277067	Up	--	-
SMESG000027587.1	0.846198	1.63875e-13	4.78194e-11	Up	MAT2A	PAA84507.1 hypothetical protein BOX15_Mlig008771g3 [Macrostomum lignano]
SMESG000027798.1	1.59438	2.13315e-23	2.86333e-20	Up	pim2	AVM18989.1 PIM-1 [Schmidtea mediterranea]
SMESG000028039.1	-0.984086	7.35393e-07	4.28721e-05	Down	--	-
SMESG000028258.1	4.33295	2.68015e-07	1.75491e-05	Up	MBL2	AAL29940.1 lectin 1, partial [Girardia tigrina]
SMESG000028260.1	4.63054	4.24843e-10	6.0028e-08	Up	MBL2	AAL29940.1 lectin 1, partial [Girardia tigrina]
SMESG000028261.1	2.48662	3.74777e-19	2.51531e-16	Up	--	ADW66116.1 lectin-like protein, partial [Schmidtea mediterranea]
SMESG000028264.1	6.21805	3.71109e-08	3.21381e-06	Up	--	ADW66116.1 lectin-like protein, partial [Schmidtea mediterranea]
SMESG000028599.1	-0.814051	0.00037602	0.00755587	Down	Nsa2	AVD99006.1 TGF beta inducible nuclear protein [Dugesia japonica]
SMESG000028953.1	-1.39093	0.000371509	0.00750345	Down	--	-
SMESG000029023.1	-1.44578	1.78904e-07	1.23785e-05	Down	TDH	XP_002008271.1 L-threonine 3-dehydrogenase, mitochondrial [Drosophila mojavensis]
SMESG000029046.1	-1.06438	1.74595e-07	1.22062e-05	Down	TMEM144	XP_026696612.1 transmembrane protein 144 isoform X1 [Ciona intestinalis]
SMESG000029118.1	-1.04103	2.45269e-05	0.000783886	Down	--	XP_022095976.1 putative methyltransferase DDB_G0268948 [Acanthaster planci]
SMESG000029269.1	-1.50408	0.00251781	0.0318535	Down	slc20a1b	AKN21545.1 slc20a-2 [Schmidtea mediterranea]
SMESG000029294.1	-1.38925	0.000306363	0.00644563	Down	pol	PAA92840.1 hypothetical protein BOX15_Mlig002220g3 [Macrostomum lignano]
SMESG000029589.1	-1.18304	1.91487e-10	2.95439e-08	Down	--	-
SMESG000029594.1	-1.35609	0.00441689	0.0465003	Down	--	-
SMESG000029602.1	-2.25201	0.00943644	0.0786741	Down	--	AFJ24802.1 hypothetical protein, partial [Schmidtea mediterranea]
SMESG000030115.1	-2.12321	6.9058e-35	2.31741e-31	Down	SLC24A5	AKN21568.1 slc24a-8 [Schmidtea mediterranea]
SMESG000030475.1	0.90853	1.08884e-05	0.000417584	Up	--	-
SMESG000030540.1	1.19422	0.00343156	0.0389397	Up	--	-
SMESG000030562.1	1.24161	1.07809e-08	1.07994e-06	Up	--	CBY89195.1 small HSP protein, partial [Dugesia japonica]
SMESG000030596.1	-0.92695	5.83452e-05	0.00162821	Down	ifa-4	QEP99785.1 intermediate filament b-like protein 1, partial [Minona ileanae]
SMESG000030599.1	-1.03287	2.47625e-12	5.83134e-10	Down	ifa-4	CAA69027.1 IF protein [Lineus viridis]
SMESG000030647.1	0.820295	0.00127232	0.0191677	Up	--	ADC84438.1 secreted peptide prohormone 18 [Schmidtea mediterranea]
SMESG000030739.1	0.908165	0.00125496	0.0189914	Up	--	-
SMESG000030835.1	0.887409	0.00850979	0.0729815	Up	slc15a4	AKN21492.1 slc15a-6 [Schmidtea mediterranea]
SMESG000030972.1	1.19822	1.064e-07	8.06896e-06	Up	unc-7	XP_018648161.1 putative innexin [Schistosoma mansoni]
SMESG000030981.1	-0.952788	8.99669e-05	0.00235864	Down	--	AEN71564.1 ferritin 3 [Argopecten irradians]
SMESG000031008.1	-0.882601	0.0128036	0.0945857	Down	KLF4	BAE72065.1 kruppel-like factor [Ambigolimax valentianus]
SMESG000031046.1	-0.815239	1.73702e-06	8.8654e-05	Down	--	XP_007906270.1 PREDICTED: stimulated by retinoic acid gene 6 protein homolog [Callorhinchus milii]
SMESG000031090.1	0.894797	1.17174e-05	0.000438113	Up	--	-
SMESG000031101.1	-1.03137	0.00220529	0.0291355	Down	--	XP_019925026.1 PREDICTED: uncharacterized protein LOC105333658 [Crassostrea gigas]
SMESG000031290.1	0.913453	0.00227382	0.0297062	Up	--	AHD24720.1 X1.A2.3 [Schmidtea mediterranea]
SMESG000031515.1	0.919244	0.0125774	0.0934289	Up	RHBDD1	NP_001016449.1 rhomboid-related protein 4 [Xenopus tropicalis]
SMESG000031543.1	1.15121	4.54815e-06	0.000200822	Up	Crispld2	XP_019925963.1 PREDICTED: TPR repeat-containing protein DDB_G0287407-like [Crassostrea gigas]
SMESG000031561.1	-1.58613	2.32243e-06	0.000112949	Down	nAChRbeta1	PAA52239.1 hypothetical protein BOX15_Mlig019166g1 [Macrostomum lignano]
SMESG000031874.1	0.978819	4.08299e-07	2.59744e-05	Up	PTPRB	KPM09442.1 tyrosine-protein phosphatase 10D-like protein [Sarcoptes scabiei]
SMESG000031930.1	1.45555	5.06507e-17	2.61494e-14	Up	mib1	XP_007070246.1 LOW QUALITY PROTEIN: E3 ubiquitin-protein ligase MIB2 [Chelonia mydas]
SMESG000032396.1	-0.91766	1.61225e-05	0.000566525	Down	UROC1	RWS03308.1 urocanate hydratase-like isoform X1 [Dinothrombium tinctorium]
SMESG000032411.1	-0.920411	0.00294203	0.0350795	Down	Nudt8	XP_013776472.1 nucleoside diphosphate-linked moiety X motif 8-like isoform X2 [Limulus polyphemus]
SMESG000032548.1	-0.974531	5.55504e-05	0.00156139	Down	crld-1	TGZ67392.1 hypothetical protein CRM22_004814 [Opisthorchis felineus]
SMESG000032730.1	0.882135	2.06917e-05	0.000687485	Up	--	-
SMESG000032769.1	2.26665	2.97753e-05	0.000940409	Up	--	-
SMESG000033033.1	-1.34391	0.00128807	0.0193398	Down	--	TNN18903.1 Lipopolysaccharide-induced tumor necrosis factor-alpha factor isoform 1 [Schistosoma japonicum]
SMESG000033095.1	-2.26534	8.74789e-16	3.9141e-13	Down	SLC47A2	AKN21703.1 slc47a-6 [Schmidtea mediterranea]
SMESG000033217.1	-1.19059	0.000284078	0.00607195	Down	zgc:153146	PAA59339.1 hypothetical protein BOX15_Mlig016035g2 [Macrostomum lignano]
SMESG000033248.1	-0.913919	0.0012673	0.0191518	Down	--	KAF0289506.1 Sex peptide receptor [Amphibalanus amphitrite]
SMESG000033256.1	0.843606	0.0124744	0.0929728	Up	nup93	XP_013421689.1 nuclear pore complex protein Nup93 isoform X1 [Lingula anatina]
SMESG000033458.1	0.954815	3.95003e-05	0.00119687	Up	--	AFJ24869.1 slit-2 [Schmidtea mediterranea]
SMESG000033518.1	-1.53922	0.000393476	0.00784789	Down	Trhde	AFJ24858.1 hypothetical protein, partial [Schmidtea mediterranea]
SMESG000033647.1	1.15467	0.00999975	0.0815967	Up	Birc5	XP_022315256.1 baculoviral IAP repeat-containing protein 5-like [Crassostrea virginica]
SMESG000033796.1	2.17423	1.15295e-08	1.13794e-06	Up	--	XP_009025398.1 hypothetical protein HELRODRAFT_163206 [Helobdella robusta]
SMESG000033958.1	-2.71395	2.87867e-19	2.0337e-16	Down	--	XP_029185063.1 hercynylcysteine sulfoxide lyase-like [Acropora millepora]
SMESG000034716.1	-0.855593	0.000568543	0.0104685	Down	--	PAA78276.1 hypothetical protein BOX15_Mlig027336g2 [Macrostomum lignano]
SMESG000034890.1	-0.803541	0.01026	0.0828138	Down	Znfx1	XP_002742448.1 PREDICTED: NFX1-type zinc finger-containing protein 1-like [Saccoglossus kowalevskii]
SMESG000035119.1	0.896556	0.00516705	0.0519382	Up	Sgf29	VZI08349.1 unnamed protein product [Sparganum proliferum]
SMESG000035149.1	0.966537	1.33882e-06	7.07519e-05	Up	Msra	XP_026070416.1 mitochondrial peptide methionine sulfoxide reductase isoform X1 [Carassius auratus]
SMESG000035189.1	-0.974129	3.72029e-07	2.38935e-05	Down	--	XP_008153860.2 LOW QUALITY PROTEIN: G patch domain-containing protein 4 [Eptesicus fuscus]
SMESG000035325.1	5.87214	5.68587e-06	0.000243062	Up	--	-
SMESG000035326.1	7.73295	2.62761e-08	2.33579e-06	Up	--	-
SMESG000035327.1	5.01213	1.18579e-07	8.79387e-06	Up	-	-
SMESG000035328.1	6.36158	3.03773e-08	2.66506e-06	Up	--	-
SMESG000035330.1	5.77831	1.49205e-08	1.40055e-06	Up	--	-
SMESG000035335.1	5.00483	1.72577e-07	1.21283e-05	Up	--	-
SMESG000035381.1	1.2698	4.2033e-17	2.25684e-14	Up	DUSP10	BAK52368.1 mitogen-activated protein kinase phosphatase [Dugesia japonica]
SMESG000035412.1	1.21602	0.000231606	0.00516419	Up	--	TSK72187.1 Prostaglandin E2 receptor EP2 subtype [Bagarius yarrelli]
SMESG000035432.1	0.905432	0.000953043	0.0154875	Up	--	-
SMESG000035646.1	0.815485	0.00860053	0.0735318	Up	--	AFD29606.1 SZ12-1 [Schmidtea mediterranea]
SMESG000035843.1	-1.25261	7.52637e-12	1.65617e-09	Down	Tat	ANZ03345.1 tyrosine aminotransferase [Rhodnius prolixus]
SMESG000035904.1	1.01635	3.23085e-07	2.09505e-05	Up	--	AFJ24813.1 GRB2 associated binding protein-1 [Schmidtea mediterranea]
SMESG000035957.1	1.11097	1.80087e-06	9.15649e-05	Up	--	-
SMESG000036036.1	-0.864366	6.45207e-06	0.000268184	Down	--	KAA0191751.1 Gynecophoral canal protein [Fasciolopsis buski]
SMESG000036037.1	-0.842639	3.6199e-06	0.000165398	Down	--	VDK87667.1 unnamed protein product [Dibothriocephalus latus]
SMESG000036266.1	-1.77619	0.00112619	0.0175983	Down	--	-
SMESG000036649.1	-0.818638	7.54963e-08	5.89178e-06	Down	--	GAU99311.1 hypothetical protein RvY_10335 [Ramazzottius varieornatus]
SMESG000036671.1	-1.4807	2.92932e-15	1.19152e-12	Down	--	XP_022294324.1 uncharacterized protein LOC111104596 [Crassostrea virginica]
SMESG000036868.1	0.992158	0.0137889	0.0992294	Up	--	-
SMESG000036895.1	-0.990085	0.00353461	0.0395311	Down	RIDA	XP_002710629.2 PREDICTED: ribonuclease UK114 [Oryctolagus cuniculus]
SMESG000036926.1	-1.03087	7.59852e-06	0.000309076	Down	--	-
SMESG000036932.1	-1.26787	1.38921e-13	4.23805e-11	Down	--	-
SMESG000036946.1	-1.08844	1.37159e-09	1.70471e-07	Down	gyg-1	XP_030906950.1 glycogenin-2 isoform X1 [Melopsittacus undulatus]
SMESG000037145.1	-0.809669	0.00145885	0.0211243	Down	--	QDF60598.1 alpha-2-macroglobulin [Dugesia japonica]
SMESG000037154.1	-1.14572	1.03685e-10	1.71823e-08	Down	Mug2	QDF60598.1 alpha-2-macroglobulin [Dugesia japonica]
SMESG000037362.1	-1.29558	2.27973e-11	4.43491e-09	Down	pm20d2	XP_014771841.1 PREDICTED: peptidase M20 domain-containing protein 2-like [Octopus bimaculoides]
SMESG000037418.1	-1.16809	2.12197e-11	4.30055e-09	Down	--	-
SMESG000037532.1	-1.20187	3.89488e-10	5.63333e-08	Down	SAT2	XP_031555174.1 diamine acetyltransferase 2-like [Actinia tenebrosa]
SMESG000037567.1	-1.01044	4.10613e-05	0.00123303	Down	Abat	XP_005420493.1 4-aminobutyrate aminotransferase, mitochondrial [Geospiza fortis]
SMESG000037599.1	-0.951345	0.0023878	0.0307006	Down	lap-2	VDD77364.1 unnamed protein product [Mesocestoides corti]
SMESG000037681.1	1.14684	0.0023439	0.0303982	Up	POLE2	XP_022334080.1 DNA polymerase epsilon subunit 2-like [Crassostrea virginica]
SMESG000037774.1	1.3783	0.0064827	0.0604287	Up	Rpb10	KAA0203222.1 hypothetical protein HAZT_HAZT000641 [Hyalella azteca]
SMESG000037948.1	0.84926	4.54294e-13	1.2196e-10	Up	--	-
SMESG000037949.1	-0.95566	0.000270795	0.00584385	Down	G3BP2	ADF47426.1 GTPase activating protein [Dugesia japonica]
SMESG000037971.1	0.888992	8.48229e-14	2.91943e-11	Up	sn	PAA92187.1 hypothetical protein BOX15_Mlig023083g2 [Macrostomum lignano]
SMESG000037996.1	1.87928	3.37413e-11	6.20423e-09	Up	G2	AFJ24821.1 tissue factor pathway inhibitor-1 [Schmidtea mediterranea]
SMESG000038000.1	1.91824	0.0111715	0.0870858	Up	Ppn	XP_023226201.1 papilin-like [Centruroides sculpturatus]
SMESG000038252.1	0.844281	0.000513856	0.0096739	Up	--	-
SMESG000038304.1	1.6847	1.90211e-05	0.000646382	Up	--	AFJ24776.1 hypothetical protein [Schmidtea mediterranea]
SMESG000038351.1	-1.34848	1.59005e-10	2.48178e-08	Down	--	-
SMESG000038553.1	-0.849979	0.00119738	0.0183362	Down	Cacybp	XP_021341769.1 calcyclin-binding protein-like [Mizuhopecten yessoensis]
SMESG000038673.1	-2.55565	2.12486e-06	0.00010486	Down	--	-
SMESG000038939.1	-0.864857	0.00906375	0.0762476	Down	--	XP_011449467.1 PREDICTED: uncharacterized protein LOC105343705 [Crassostrea gigas]
SMESG000039074.1	-0.922951	0.000728985	0.0126587	Down	ASL	XP_021364765.1 argininosuccinate lyase-like [Mizuhopecten yessoensis]
SMESG000039310.1	-0.886106	0.0090368	0.0762419	Down	Smtn	XP_013782738.1 smoothelin-like [Limulus polyphemus]
SMESG000039587.1	1.33286	5.71803e-07	3.45735e-05	Up	--	-
SMESG000039672.1	-1.02083	0.00332362	0.0380982	Down	--	XP_009062964.1 hypothetical protein LOTGIDRAFT_235459 [Lottia gigantea]
SMESG000039759.1	0.830653	0.00681645	0.0628846	Up	--	-
SMESG000039783.1	1.09408	0.000823614	0.0138712	Up	TUBA1A	XP_009051687.1 hypothetical protein LOTGIDRAFT_181858 [Lottia gigantea]
SMESG000039792.1	-1.69699	8.32485e-05	0.00220403	Down	Sdr9c7	KFM78604.1 Estradiol 17-beta-dehydrogenase 2, partial [Stegodyphus mimosarum]
SMESG000039794.1	-1.69056	0.002335	0.0303121	Down	Sdr9c7	KFM78604.1 Estradiol 17-beta-dehydrogenase 2, partial [Stegodyphus mimosarum]
SMESG000039803.1	-0.98356	0.000229065	0.0051174	Down	--	-
SMESG000039812.1	0.819668	3.903e-10	5.63333e-08	Up	ATP7A	XP_013413564.1 copper-transporting ATPase 1-like isoform X2 [Lingula anatina]
SMESG000039950.1	-0.956265	4.45798e-07	2.79652e-05	Down	Tep1	RDD37418.1 Telomerase protein component 1 [Trichoplax sp. H2]
SMESG000039981.1	-0.949214	0.0132819	0.0970515	Down	Usp16	XP_023716130.1 ubiquitin carboxyl-terminal hydrolase 30 homolog isoform X1 [Cryptotermes secundus]
SMESG000040102.1	0.946208	6.29141e-07	3.72025e-05	Up	--	-
SMESG000040122.1	0.86671	0.00955879	0.0791534	Up	RRP15	XP_013771713.1 RRP15-like protein [Limulus polyphemus]
SMESG000040206.1	-1.08055	1.49814e-07	1.07321e-05	Down	--	-
SMESG000040291.1	-1.36	1.85298e-13	5.29203e-11	Down	--	-
SMESG000040316.1	1.02504	1.76357e-05	0.000608545	Up	CYRIB	VZI02046.1 unnamed protein product [Sparganum proliferum]
SMESG000040447.1	1.03249	8.12322e-07	4.63991e-05	Up	--	-
SMESG000040454.1	0.809316	0.0110343	0.08635	Up	csd	THD27985.1 tRNA 2-thiocytidine biosynthesis protein TtcA [Fasciola hepatica]
SMESG000040596.1	2.8287	4.02285e-10	5.74454e-08	Up	--	-
SMESG000040780.1	-1.19609	2.66569e-05	0.000847903	Down	Mmp19	CCC86588.1 mmp1 protein [Schmidtea mediterranea]
SMESG000040786.1	-0.963815	1.97462e-06	9.89004e-05	Down	Mmp19	CCC86588.1 mmp1 protein [Schmidtea mediterranea]
SMESG000040849.1	-1.91961	1.08759e-07	8.11038e-06	Down	slc52a3a	XP_023691021.1 solute carrier family 52, riboflavin transporter, member 3 [Paramormyrops kingsleyae]
SMESG000040959.1	-0.984217	1.41924e-08	1.36074e-06	Down	--	-
SMESG000041022.1	-1.74728	6.1693e-06	0.000259594	Down	--	-
SMESG000041045.1	-1.36435	0.000459819	0.00889359	Down	Odc1	RUS88763.1 hypothetical protein EGW08_003480 [Elysia chlorotica]
SMESG000041777.1	-0.969467	2.41179e-05	0.000774484	Down	4cl1	PAA48702.1 hypothetical protein BOX15_Mlig017208g3 [Macrostomum lignano]
SMESG000041811.1	-1.09	0.00086084	0.0142655	Down	ABCF1	TGZ50390.1 hypothetical protein CRM22_010791 [Opisthorchis felineus]
SMESG000042095.1	0.828129	0.00547274	0.0540549	Up	seb-2	XP_014781135.1 PREDICTED: calcitonin gene-related peptide type 1 receptor-like [Octopus bimaculoides]
SMESG000042109.1	1.38308	4.77209e-05	0.00138881	Up	--	THD20653.1 hypothetical protein D915_008391 [Fasciola hepatica]
SMESG000042369.1	-1.36783	0.00199317	0.02697	Down	--	-
SMESG000042500.1	-1.1513	5.19771e-06	0.000227128	Down	--	-
SMESG000042765.1	-2.24162	0.00492976	0.0499227	Down	--	-
SMESG000042952.1	-1.66721	1.91861e-19	1.51491e-16	Down	--	-
SMESG000043134.1	1.0144	0.000156301	0.00376731	Up	unc-9	AFJ24866.1 innexin-1 [Schmidtea mediterranea]
SMESG000043289.1	-0.879198	0.0056744	0.0555967	Down	--	-
SMESG000043400.1	-0.814994	0.000281924	0.00604515	Down	--	KAF2348400.1 hypothetical protein FHG87_020845 [Trinorchestia longiramus]
SMESG000043419.1	-1.53725	0.00019869	0.0045668	Down	--	-
SMESG000043528.1	-1.85334	2.57452e-07	1.71078e-05	Down	SULT1C4	THD23764.1 Aryl sulfotransferase [Fasciola hepatica]
SMESG000043544.1	-1.12825	0.00366819	0.040659	Down	--	AKN21684.1 slc43a-2 [Schmidtea mediterranea]
SMESG000043575.1	1.43716	0.00046383	0.00895826	Up	unc-7	AFD29613.1 INX-13 [Schmidtea mediterranea]
SMESG000043630.1	-0.930865	7.66144e-06	0.000310693	Down	ACSS3	PAA53974.1 hypothetical protein BOX15_Mlig003121g5, partial [Macrostomum lignano]
SMESG000043662.1	-0.959745	0.00362651	0.0402303	Down	--	-
SMESG000043665.1	0.855036	0.0115289	0.0885455	Up	--	VDP36256.1 unnamed protein product [Schistosoma curassoni]
SMESG000043826.1	2.85654	4.53336e-11	7.90276e-09	Up	--	AFJ24715.1 hadrian [Schmidtea mediterranea]
SMESG000044131.1	0.814361	0.000229126	0.0051174	Up	TMEM135	XP_011154988.1 transmembrane protein 135 [Harpegnathos saltator]
SMESG000044135.1	1.22822	3.62267e-06	0.000165398	Up	--	AFJ24831.1 hypothetical protein [Schmidtea mediterranea]
SMESG000044184.1	1.35184	0.00825834	0.0714711	Up	20L	AFJ24744.1 ribonucleoside diphosphate reductase subunit M2-2 [Schmidtea mediterranea]
SMESG000044188.1	1.09119	0.00446184	0.0466807	Up	rrm2	AFJ24744.1 ribonucleoside diphosphate reductase subunit M2-2 [Schmidtea mediterranea]
SMESG000044230.1	1.09704	0.00124273	0.0188488	Up	--	AFJ24787.1 hypothetical protein [Schmidtea mediterranea]
SMESG000044281.1	-0.92816	2.45933e-06	0.000117062	Down	--	XP_015260507.1 PREDICTED: glycine N-acyltransferase-like protein 3 [Cyprinodon variegatus]
SMESG000044323.1	2.92612	0.00536864	0.0533005	Up	TFPI	XP_026552715.1 tissue factor pathway inhibitor isoform X1 [Pseudonaja textilis]
SMESG000044362.1	1.27926	9.50588e-09	9.74026e-07	Up	Os07g0688000	XP_022312852.1 manganese-dependent ADP-ribose/CDP-alcohol diphosphatase-like isoform X1 [Crassostrea virginica]
SMESG000044557.1	-0.80687	0.00134932	0.019969	Down	RAB27B	XP_022369506.1 ras-related protein Rab-27B [Enhydra lutris kenyoni]
SMESG000044561.1	1.037	2.06174e-05	0.000686717	Up	--	-
SMESG000044566.1	0.810817	0.0122561	0.0920101	Up	GG14034	VUZ57497.1 unnamed protein product [Hymenolepis diminuta]
SMESG000044678.1	1.86494	1.6244e-20	1.67726e-17	Up	MPEG1	XP_015766206.1 PREDICTED: LOW QUALITY PROTEIN: macrophage-expressed gene 1 protein-like [Acropora digitifera]
SMESG000044680.1	1.70567	4.1808e-08	3.52949e-06	Up	MPEG1	RMX43816.1 hypothetical protein pdam_00017055 [Pocillopora damicornis]
SMESG000045072.1	-0.938977	7.59489e-10	1.00937e-07	Down	MAN2B1	XP_021363354.1 lysosomal alpha-mannosidase-like [Mizuhopecten yessoensis]
SMESG000045267.1	-1.47687	1.44274e-10	2.27835e-08	Down	CSH1	XP_023932950.1 inositol phosphoceramide mannosyltransferase 2-like [Lingula anatina]
SMESG000045436.1	-0.824012	0.0104766	0.084007	Down	C38H2.2	PAA45971.1 hypothetical protein BOX15_Mlig007521g3 [Macrostomum lignano]
SMESG000045477.1	-1.25264	6.09093e-09	6.52487e-07	Down	ELOVL4	XP_013076488.1 PREDICTED: elongation of very long chain fatty acids protein 4-like [Biomphalaria glabrata]
SMESG000045597.1	-0.96431	0.00930947	0.0778729	Down	--	XP_018094971.1 PREDICTED: microsomal triglyceride transfer protein large subunit [Xenopus laevis]
SMESG000046092.1	-1.15093	1.40348e-09	1.72835e-07	Down	SULT1E1	PAA64171.1 hypothetical protein BOX15_Mlig013426g1 [Macrostomum lignano]
SMESG000046414.1	-0.898884	0.00138938	0.0203994	Down	Slc1a2	AKN21393.1 slc1a-3 [Schmidtea mediterranea]
SMESG000046671.1	0.903495	4.00832e-08	3.4053e-06	Up	MTHFR	ELU06114.1 hypothetical protein CAPTEDRAFT_181552 [Capitella teleta]
SMESG000046728.1	0.85604	0.00213795	0.0284136	Up	--	XP_018647833.1 hypothetical protein Smp_035560.1 [Schistosoma mansoni]
SMESG000046775.1	-0.862478	4.21242e-05	0.00125932	Down	--	AHD24744.1 X1.A.G7.1, partial [Schmidtea mediterranea]
SMESG000046786.1	-1.64108	1.92485e-06	9.67689e-05	Down	--	AHD24744.1 X1.A.G7.1, partial [Schmidtea mediterranea]
SMESG000046850.1	-1.32122	0.00693673	0.0635161	Down	--	-
SMESG000047057.1	-0.847023	6.63786e-05	0.00181097	Down	Sctr	XP_011495598.1 PREDICTED: parathyroid hormone 2 receptor-like [Ceratosolen solmsi marchali]
SMESG000047160.1	0.863559	0.00183194	0.0252207	Up	PLXNB2	AJA72715.1 plexin B-5, partial [Schmidtea mediterranea]
SMESG000047333.1	-1.12862	4.97227e-10	6.95237e-08	Down	--	VDP74770.1 unnamed protein product [Echinostoma caproni]
SMESG000047487.1	-0.902992	0.0137782	0.0992195	Down	--	VDN97986.1 unnamed protein product [Rodentolepis nana]
SMESG000047560.1	1.07737	0.0107301	0.0849177	Up	--	-
SMESG000047702.1	-0.985238	0.0107357	0.0849177	Down	--	-
SMESG000048209.1	-0.821885	1.83983e-06	9.30172e-05	Down	--	AHD24738.1 X1.A.B7.1 [Schmidtea mediterranea]
SMESG000048226.1	0.90765	0.0034547	0.0390117	Up	tada2b	TPP63993.1 Transcriptional adaptor 2 (Ada2) [Fasciola gigantica]
SMESG000048287.1	-1.18726	5.95715e-08	4.81704e-06	Down	--	-
SMESG000048623.1	-0.960466	0.0120598	0.090994	Down	Pka-C1	VUZ43226.1 unnamed protein product [Hymenolepis diminuta]
SMESG000048745.1	-0.895772	0.00444323	0.0465949	Down	--	KAA0188054.1 hypothetical protein FBUS_07318 [Fasciolopsis buski]
SMESG000048839.1	1.03536	0.00851442	0.0729815	Up	--	XP_002739189.1 PREDICTED: transmembrane protein 42-like [Saccoglossus kowalevskii]
SMESG000049109.1	0.820199	0.00240733	0.0308041	Up	His3.3A	THD26469.1 histone H3 [Fasciola hepatica]
SMESG000049184.1	0.844896	0.000100784	0.00258666	Up	--	PAA72450.1 hypothetical protein BOX15_Mlig006986g1 [Macrostomum lignano]
SMESG000049222.1	1.034	4.47765e-07	2.79652e-05	Up	--	-
SMESG000049223.1	1.22055	1.57944e-07	1.12173e-05	Up	PTPRJ	XP_023957944.1 receptor-type tyrosine-protein phosphatase eta [Chrysemys picta bellii]
SMESG000049230.1	-1.23682	2.3426e-08	2.12464e-06	Down	--	-
SMESG000049421.1	-1.1032	0.00793182	0.0695874	Down	Dhps	XP_013393091.1 deoxyhypusine synthase [Lingula anatina]
SMESG000049466.1	-1.1157	3.82784e-09	4.21156e-07	Down	--	XP_031553749.1 DENN domain-containing protein 3-like isoform X2 [Actinia tenebrosa]
SMESG000049472.1	0.955235	0.00149617	0.0215484	Up	--	XP_004078319.1 replication protein A 32 kDa subunit [Oryzias latipes]
SMESG000049775.1	-0.8971	0.000548183	0.0101774	Down	BRF1	THD26720.1 Transcription factor IIIB subunit [Fasciola hepatica]
SMESG000049924.1	-1.09938	6.45335e-06	0.000268184	Down	--	GAA52233.1 hypothetical protein CLF_107652 [Clonorchis sinensis]
SMESG000049972.1	0.886785	0.0122804	0.0920419	Up	ZBTB41	VDK35197.1 unnamed protein product [Taenia asiatica]
SMESG000050169.1	0.95303	0.00240669	0.0308041	Up	ZCCHC10	XP_032779997.1 zinc finger CCHC domain-containing protein 10-like [Daphnia magna]
SMESG000050280.1	-0.97652	1.03384e-08	1.0434e-06	Down	--	-
SMESG000050288.1	-1.74994	2.07755e-20	1.85913e-17	Down	Cryl1	XP_014279515.1 lambda-crystallin homolog [Halyomorpha halys]
SMESG000050292.1	-1.04343	0.00845624	0.0726902	Down	--	-
SMESG000050303.1	-1.33336	4.70953e-05	0.00138026	Down	--	-
SMESG000050387.1	1.07606	0.00950868	0.0789332	Up	CDC16	XP_009065565.1 hypothetical protein LOTGIDRAFT_132783 [Lottia gigantea]
SMESG000050486.1	-1.21889	3.43287e-06	0.000157806	Down	--	-
SMESG000051012.1	1.19235	1.02321e-05	0.000398103	Up	--	-
SMESG000051055.1	-1.1846	0.0127141	0.0940805	Down	--	-
SMESG000051078.1	-0.821531	6.8031e-05	0.00184098	Down	Pde2a	XP_022322477.1 cGMP-dependent 3',5'-cyclic phosphodiesterase-like isoform X6 [Crassostrea virginica]
SMESG000051338.1	1.70123	3.25638e-06	0.000151247	Up	--	GBM21223.1 hypothetical protein AVEN_265822_1 [Araneus ventricosus]
SMESG000051358.1	-0.839448	0.00322354	0.0373981	Down	--	XP_025085864.1 probable protein S-acyltransferase 23 isoform X1 [Pomacea canaliculata]
SMESG000051385.1	0.918455	0.00879495	0.0749553	Up	--	-
SMESG000051567.1	0.919787	4.79043e-05	0.00138881	Up	HSPA8	QGN03550.1 heat shock protein 70-2 [Dugesia japonica]
SMESG000051625.1	0.839223	0.011028	0.08635	Up	--	-
SMESG000051626.1	0.892929	2.51129e-07	1.67707e-05	Up	--	ELU00686.1 hypothetical protein CAPTEDRAFT_125662 [Capitella teleta]
SMESG000051640.1	-1.04338	6.74422e-05	0.00183254	Down	CPIJ001621	XP_018024601.1 PREDICTED: adenylyltransferase and sulfurtransferase MOCS3-like [Hyalella azteca]
SMESG000051787.1	-1.29062	0.00196682	0.0266674	Down	Gcnt1	XP_025102018.1 beta-1,3-galactosyl-O-glycosyl-glycoprotein beta-1,6-N-acetylglucosaminyltransferase-like isoform X1 [Pomacea canaliculata]
SMESG000051815.1	-0.827783	5.67304e-14	2.05809e-11	Down	Hspa8	QGN03549.1 heat shock protein 70-1 [Dugesia japonica]
SMESG000051898.1	-1.02938	0.000776022	0.0132358	Down	--	-
SMESG000051913.1	1.90166	1.00696e-08	1.02397e-06	Up	--	AHD24748.1 X1.B.F11.1 [Schmidtea mediterranea]
SMESG000051914.1	2.0138	1.25923e-13	4.02444e-11	Up	--	-
SMESG000051915.1	0.949622	0.00297669	0.035323	Up	--	-
SMESG000051917.1	2.60502	0.00304328	0.0359594	Up	--	AFJ24817.1 hypothetical protein, partial [Schmidtea mediterranea]
SMESG000051921.1	2.12267	2.44326e-08	2.20106e-06	Up	--	AHD24748.1 X1.B.F11.1 [Schmidtea mediterranea]
SMESG000051929.1	0.824765	0.000705486	0.0124602	Up	gatm	VDP77876.1 unnamed protein product [Echinostoma caproni]
SMESG000051959.1	0.840708	0.0110578	0.0864469	Up	CPSF1	THD26969.1 Cleavage and polyadenylation specificity factor subunit 1 [Fasciola hepatica]
SMESG000052008.1	-1.82823	2.40809e-05	0.000774484	Down	SLC26A5	AKN21611.1 slc26a-7 [Schmidtea mediterranea]
SMESG000052463.1	1.2419	2.52859e-05	0.000806204	Up	--	AHD24759.1 X1.D.H1.3 [Schmidtea mediterranea]
SMESG000052481.1	-1.21769	0.00222778	0.0293171	Down	--	-
SMESG000052499.1	0.883765	0.00304189	0.0359594	Up	AOC1	RTG85849.1 diamine oxidase [Schistosoma bovis]
SMESG000052597.1	0.83932	0.00100886	0.0161791	Up	--	XP_028811066.1 tetraspanin-8 [Denticeps clupeoides]
SMESG000052690.1	-1.19279	0.000185177	0.00430698	Down	--	PAA65237.1 hypothetical protein BOX15_Mlig018174g1 [Macrostomum lignano]
SMESG000052728.1	1.41984	0.00811618	0.0708806	Up	--	-
SMESG000052759.1	1.10536	0.000115994	0.00292118	Up	ARF	XP_022315497.1 ADP-ribosylation factor-like [Crassostrea virginica]
SMESG000052979.1	-0.876151	3.18109e-09	3.55831e-07	Down	Gcat	XP_013092915.1 PREDICTED: 2-amino-3-ketobutyrate coenzyme A ligase, mitochondrial-like [Biomphalaria glabrata]
SMESG000053020.1	-0.898772	5.76983e-06	0.000245868	Down	--	-
SMESG000053446.1	-0.888194	0.0104868	0.0840385	Down	mec-4	XP_030832317.1 degenerin mec-4 [Strongylocentrotus purpuratus]
SMESG000053503.1	-1.23936	0.000833377	0.0139482	Down	--	XP_021003341.1 microsomal triglyceride transfer protein large subunit-like [Parasteatoda tepidariorum]
SMESG000053627.1	1.17428	7.25127e-09	7.54526e-07	Up	Stk24	XP_001033277.2 cyclin-dependent kinase-like Serine/Threonine kinase family protein [Tetrahymena thermophila SB210]
SMESG000053669.1	-0.846894	0.000579363	0.0106386	Down	VWA5A	AFJ24785.1 vault protein inter alpha trypsin-1, partial [Schmidtea mediterranea]
SMESG000053708.1	-1.54749	2.6455e-20	2.21941e-17	Down	Mrc1	AAL29940.1 lectin 1, partial [Girardia tigrina]
SMESG000053709.1	-1.38381	6.12481e-09	6.52487e-07	Down	CGN1	AAL29935.1 scarf3b [Girardia tigrina]
SMESG000053747.1	0.924862	0.00805576	0.0703987	Up	--	RJW73108.1 U3 small nucleolar RNA-associated protein 15 -like protein, partial [Clonorchis sinensis]
SMESG000053975.1	1.63415	0.00172701	0.0240225	Up	inx-19	VDO05695.1 unnamed protein product [Rodentolepis nana]
SMESG000054042.1	1.19153	3.11829e-05	0.000977964	Up	stg	ANE21817.2 CDC25-2 protein, partial [Schmidtea mediterranea]
SMESG000054105.1	0.866054	7.42151e-06	0.000302793	Up	--	-
SMESG000054316.1	-0.830261	4.41161e-05	0.00130722	Down	--	-
SMESG000054351.1	2.74159	1.3434e-13	4.19361e-11	Up	H4-I	XP_033116238.1 uncharacterized protein LOC117116331 [Anneissia japonica]
SMESG000054560.1	1.68699	1.7233e-08	1.60638e-06	Up	--	XP_015771546.1 PREDICTED: uncharacterized protein LOC107349868 [Acropora digitifera]
SMESG000054758.1	-1.05688	0.00899636	0.0759963	Down	--	-
SMESG000054786.1	-1.0661	0.0110109	0.0862811	Down	--	-
SMESG000055031.1	-1.00332	7.28496e-05	0.00195964	Down	--	-
SMESG000055047.1	0.846004	0.00045121	0.00877767	Up	--	XP_022330457.1 G-protein coupled receptor 183-like [Crassostrea virginica]
SMESG000055072.1	-1.08401	0.000222594	0.00501323	Down	--	-
SMESG000055131.1	-0.860454	6.69605e-05	0.00182314	Down	Rnls	XP_009061892.1 hypothetical protein LOTGIDRAFT_127891 [Lottia gigantea]
SMESG000055257.1	-1.48312	1.3064e-06	6.98639e-05	Down	unc-7	BAE78812.1 innexin3 [Dugesia japonica]
SMESG000055258.1	-1.23703	1.9875e-05	0.000670307	Down	inx-11	BAE78812.1 innexin3 [Dugesia japonica]
SMESG000055506.1	-1.12537	1.81097e-08	1.65531e-06	Down	CBSDUF6	PAA57531.1 hypothetical protein BOX15_Mlig009042g1 [Macrostomum lignano]
SMESG000055636.1	0.997337	0.000379333	0.00761103	Up	TRMT112	XP_002129541.1 multifunctional methyltransferase subunit TRM112-like protein [Ciona intestinalis]
SMESG000055659.1	-0.96346	5.11646e-08	4.21339e-06	Down	Chdh	XP_021265032.1 choline dehydrogenase, mitochondrial [Numida meleagris]
SMESG000055694.1	-0.955136	5.21689e-06	0.000227128	Down	kmo	XP_013410257.1 kynurenine 3-monooxygenase isoform X1 [Lingula anatina]
SMESG000055743.1	0.992181	1.53718e-12	3.75156e-10	Up	ubq-1	THD18230.1 Polyubiquitin-C [Fasciola hepatica]
SMESG000055750.1	-1.00914	0.00401275	0.0432636	Down	odc1-a	XP_020367036.1 ornithine decarboxylase isoform X1 [Rhincodon typus]
SMESG000055775.1	-0.981029	0.0140353	0.0999447	Down	--	XP_012941622.1 PREDICTED: uncharacterized protein LOC101854111 [Aplysia californica]
SMESG000055793.1	-1.08383	1.4178e-10	2.26561e-08	Down	--	XP_025080094.1 uncharacterized protein LOC112555793 isoform X1 [Pomacea canaliculata]
SMESG000055797.1	3.95414	1.62047e-48	2.17516e-44	Up	PI16	AFJ24739.1 GLI pathogenesis related-1, partial [Schmidtea mediterranea]
SMESG000055800.1	1.04307	1.75427e-05	0.000606895	Up	--	PRP83276.1 hypothetical protein PROFUN_09488 [Planoprotostelium fungivorum]
SMESG000055914.1	1.43492	0.0104123	0.0836284	Up	F08C6.2	RZC34239.1 choline-phosphate cytidylyltransferase A-like [Asbolus verrucosus]
SMESG000056350.1	0.862095	0.00974409	0.0799755	Up	--	-
SMESG000056375.1	-1.11795	2.17998e-10	3.32522e-08	Down	--	-
SMESG000056380.1	-0.800583	6.70267e-15	2.57057e-12	Down	RDX	XP_007903803.1 PREDICTED: radixin isoform X2 [Callorhinchus milii]
SMESG000056509.1	-2.05824	2.32251e-24	3.89688e-21	Down	Pde4d	XP_029716999.1 LOW QUALITY PROTEIN: cAMP-specific 3',5'-cyclic phosphodiesterase-like [Aedes albopictus]
SMESG000056914.1	1.00388	0.00758718	0.067535	Up	--	-
SMESG000056953.1	-1.11671	1.4974e-06	7.76048e-05	Down	AGPAT3	XP_005111448.1 PREDICTED: 1-acyl-sn-glycerol-3-phosphate acyltransferase delta-like [Aplysia californica]
SMESG000057252.1	-1.43496	7.8695e-10	1.03195e-07	Down	ABCC1	PAA88602.1 hypothetical protein BOX15_Mlig016190g1 [Macrostomum lignano]
SMESG000057502.1	2.06956	2.38274e-09	2.7572e-07	Up	--	-
SMESG000057913.1	0.80915	0.00237801	0.0306923	Up	ACT1	XP_014350129.1 PREDICTED: actin, cytoplasmic type 5 isoform X1 [Latimeria chalumnae]
SMESG000057914.1	1.20962	0.000183368	0.00427318	Up	ACT1	XP_014350129.1 PREDICTED: actin, cytoplasmic type 5 isoform X1 [Latimeria chalumnae]
SMESG000057992.1	1.44235	3.78964e-05	0.00116403	Up	ACT1	KAA3676143.1 actin beta/gamma 1 [Paragonimus westermani]
SMESG000058218.1	-1.30588	0.000285636	0.00609554	Down	amdhd1	XP_006273053.1 PREDICTED: probable imidazolonepropionase [Alligator mississippiensis]
SMESG000058546.1	1.33235	0.000863244	0.0142877	Up	--	-
SMESG000058876.1	-1.08703	6.44377e-05	0.00177847	Down	--	AWV63261.1 tgs-1 [Schmidtea mediterranea]
SMESG000058949.1	2.17232	3.83879e-08	3.30308e-06	Up	--	-
SMESG000058962.1	0.916141	0.011405	0.0880656	Up	cps-6	PAA50205.1 hypothetical protein BOX15_Mlig022984g3, partial [Macrostomum lignano]
SMESG000059202.1	-1.351	4.55755e-07	2.83222e-05	Down	--	-
SMESG000059518.1	0.893516	0.000598624	0.0109324	Up	--	-
SMESG000059578.1	-0.811963	0.0073594	0.0659888	Down	Nampt	XP_022301606.1 nicotinamide phosphoribosyltransferase-like [Crassostrea virginica]
SMESG000059853.1	1.357	8.3418e-07	4.74457e-05	Up	--	CBY89195.1 small HSP protein, partial [Dugesia japonica]
SMESG000060104.1	-0.824205	0.000118975	0.00297947	Down	MAK16	VDL99443.1 unnamed protein product [Schistocephalus solidus]
SMESG000060297.1	-1.04734	0.00401708	0.0432755	Down	--	VZI13085.1 unnamed protein product [Sparganum proliferum]
SMESG000060320.1	0.955544	0.0122947	0.0920419	Up	CSNK2B	XP_013420325.1 casein kinase II subunit beta isoform X3 [Lingula anatina]
SMESG000060484.1	-0.821577	2.04991e-05	0.000684475	Down	--	-
SMESG000060675.1	-1.4054	2.22351e-11	4.38915e-09	Down	w	PAA52991.1 hypothetical protein BOX15_Mlig012313g4 [Macrostomum lignano]
SMESG000060680.1	-1.17273	2.37575e-16	1.13892e-13	Down	CYP3A24	XP_022343234.1 cytochrome P450 3A24-like [Crassostrea virginica]
SMESG000061103.1	1.18322	0.00018145	0.00423582	Up	DYNLRB2	XP_032827019.1 dynein light chain roadblock-type 1 [Petromyzon marinus]
SMESG000061302.1	2.80474	0.00715824	0.064791	Up	--	-
SMESG000061393.1	-0.84808	0.00011689	0.00293823	Down	--	AKN21505.1 slc16a-10 [Schmidtea mediterranea]
SMESG000061515.1	1.08812	0.000356613	0.00731928	Up	--	-
SMESG000061517.1	1.14388	0.00194342	0.0264301	Up	--	-
SMESG000061897.1	-0.857942	4.62379e-09	5.04595e-07	Down	AK3	AAV40857.1 GTP:AMP Phosphotransferase [Clonorchis sinensis]
SMESG000062613.1	0.947266	0.000166699	0.00396523	Up	RPE	XP_029634869.1 ribulose-phosphate 3-epimerase-like [Octopus vulgaris]
SMESG000062644.1	1.80176	2.89492e-10	4.31762e-08	Up	--	PAA73784.1 hypothetical protein BOX15_Mlig019714g3 [Macrostomum lignano]
SMESG000062649.1	0.981965	5.77905e-10	7.91554e-08	Up	--	AFJ24819.1 1-Jun [Schmidtea mediterranea]
SMESG000062718.1	1.06047	0.00382388	0.0419689	Up	--	XP_009172576.1 hypothetical protein T265_08498 [Opisthorchis viverrini]
SMESG000062760.1	-1.24921	0.000941613	0.0153389	Down	cpe	XP_013414827.1 carboxypeptidase E [Lingula anatina]
SMESG000062806.1	1.45705	2.66769e-09	3.06055e-07	Up	--	AFJ24722.1 inhibin-1 [Schmidtea mediterranea]
SMESG000062836.1	1.43805	4.48168e-11	7.90276e-09	Up	--	AHD24723.1 X1.A5.1, partial [Schmidtea mediterranea]
SMESG000062902.1	-1.08458	0.00472186	0.0484972	Down	CalpB	PAA89492.1 hypothetical protein BOX15_Mlig013791g1 [Macrostomum lignano]
SMESG000062971.1	0.862561	0.000754978	0.0129758	Up	--	AHD24747.1 X1.B.B5.3, partial [Schmidtea mediterranea]
SMESG000062986.1	1.47278	0.000132661	0.00329761	Up	--	-
SMESG000063420.1	0.95124	0.00458674	0.047506	Up	--	AGX01006.1 bmp-like protein [Schmidtea mediterranea]
SMESG000063448.1	1.58994	4.11018e-06	0.000183292	Up	--	AFJ24867.1 peptidoglycan recognition protein-1 [Schmidtea mediterranea]
SMESG000063471.1	2.39137	0.000813509	0.0137528	Up	Cp1	PAV61346.1 hypothetical protein WR25_18197 [Diploscapter pachys]
SMESG000063517.1	2.39077	1.48838e-18	9.51361e-16	Up	Cp1	PAA54736.1 hypothetical protein BOX15_Mlig002369g2 [Macrostomum lignano]
SMESG000063885.1	1.48447	1.1383e-05	0.000432401	Up	Cyp2c23	PAA81231.1 hypothetical protein BOX15_Mlig004420g4 [Macrostomum lignano]
SMESG000063974.1	-1.00087	0.00165617	0.023257	Down	--	-
SMESG000064024.1	1.50431	0.00034653	0.00714512	Up	--	-
SMESG000064034.1	-3.03106	9.21562e-29	2.47402e-25	Down	MBD2	AHB82104.1 methyl-CpG binding domain 2/3 [Schmidtea mediterranea]
SMESG000064565.1	1.19004	2.26458e-06	0.000110536	Up	SLC26A5	AKN21607.1 slc26a-3 [Schmidtea mediterranea]
SMESG000064601.1	1.1312	0.00254121	0.0320237	Up	--	AHD24734.1 1.E7.3 [Schmidtea mediterranea]
SMESG000065086.1	1.48661	2.20912e-06	0.000108222	Up	--	-
SMESG000065093.1	1.28999	0.000294031	0.00623505	Up	--	-
SMESG000065095.1	1.33831	1.29974e-07	9.48176e-06	Up	--	-
SMESG000065254.1	1.43875	2.33982e-05	0.000760469	Up	--	XP_033126558.1 uncharacterized protein LOC117124435 [Anneissia japonica]
SMESG000065495.1	-1.90563	8.96093e-10	1.14555e-07	Down	Pxdn	KAA3681541.1 peroxidase [Paragonimus westermani]
SMESG000065836.1	1.02316	1.94105e-09	2.30573e-07	Up	--	-
SMESG000065938.1	-1.1481	9.57152e-05	0.00248028	Down	--	XP_012942420.1 PREDICTED: uncharacterized protein LOC101845869 [Aplysia californica]
SMESG000066020.1	2.01758	3.65097e-12	8.44949e-10	Up	act-2b	KAA3676143.1 actin beta/gamma 1 [Paragonimus westermani]
SMESG000066317.1	0.801747	0.00649048	0.0604592	Up	PSMD3	TNN06836.1 26S proteasome non-ATPase regulatory subunit 3 isoform 1 [Schistosoma japonicum]
SMESG000066384.1	0.917095	4.90734e-05	0.00141659	Up	--	AFD29622.1 ZFP-1 [Schmidtea mediterranea]
SMESG000066416.1	0.804842	0.0123395	0.092275	Up	--	-
SMESG000066563.1	-0.900427	4.8423e-07	2.99531e-05	Down	daao-1	BAN78701.1 D-amino acid oxidase [Dugesia ryukyuensis]
SMESG000066568.1	-0.880187	5.8896e-06	0.000249388	Down	--	XP_009164078.1 hypothetical protein T265_01724 [Opisthorchis viverrini]
SMESG000066595.1	3.51774	1.69562e-06	8.68716e-05	Up	ECU02_0740i	XP_023135931.1 polyubiquitin-C [Amphiprion ocellaris]
SMESG000066596.1	1.77701	1.64745e-18	1.00517e-15	Up	--	-
SMESG000066667.1	2.80965	0.000720164	0.0126359	Up	--	-
SMESG000066719.1	-0.904196	3.64824e-05	0.00112835	Down	ETHE1	XP_014288724.1 persulfide dioxygenase ETHE1, mitochondrial [Halyomorpha halys]
SMESG000066756.1	1.93658	2.33297e-06	0.000113052	Up	--	-
SMESG000066824.1	1.00024	0.0108804	0.0856588	Up	--	XP_002118395.1 hypothetical protein TRIADDRAFT_34123 [Trichoplax adhaerens]
SMESG000067191.1	-1.07012	0.000693834	0.0123178	Down	--	-
SMESG000067649.1	1.24178	0.00239988	0.0308041	Up	--	VDD77796.1 unnamed protein product [Mesocestoides corti]
SMESG000067668.1	1.05583	0.00262912	0.0327394	Up	--	-
SMESG000067682.1	-0.904036	0.00072888	0.0126587	Down	sox2	AIZ72737.1 SOXB1-2, partial [Schmidtea polychroa]
SMESG000067698.1	-0.820422	0.000758043	0.0129952	Down	RSPH3	PAA58963.1 hypothetical protein BOX15_Mlig020095g1 [Macrostomum lignano]
SMESG000067794.1	1.4539	2.14659e-11	4.30055e-09	Up	xiap	-
SMESG000067888.1	1.66226	8.70875e-05	0.00229211	Up	WNT4	ABY85209.1 wntP-3 [Schmidtea mediterranea]
SMESG000067906.1	2.74913	2.59054e-14	9.65913e-12	Up	his-48	AFJ24860.1 histone h2b-2, partial [Schmidtea mediterranea]
SMESG000067932.1	1.28341	2.15367e-06	0.000105893	Up	H2AC21	XP_018096298.1 PREDICTED: histone H2A type 1-like [Xenopus laevis]
SMESG000068121.1	-1.50099	0.000111232	0.00281181	Down	ASNS	XP_031566811.1 asparagine synthetase [glutamine-hydrolyzing]-like [Actinia tenebrosa]
SMESG000068141.1	1.18836	0.00946982	0.0787923	Up	ATP6AP2	XP_025079011.1 renin receptor-like [Pomacea canaliculata]
SMESG000068215.1	-0.9912	0.0113125	0.087571	Down	HSPA5	AET10307.2 glucose-regulated protein 78 [Dugesia japonica]
SMESG000068428.1	-1.91345	2.66512e-07	1.75491e-05	Down	--	AIX99543.1 pmp-10, partial [Schmidtea mediterranea]
SMESG000068583.1	1.03733	0.000753845	0.0129734	Up	--	-
SMESG000068605.1	-0.900876	0.011628	0.0890885	Down	Abca1	XP_013414368.2 LOW QUALITY PROTEIN: ATP-binding cassette sub-family A member 1-like [Lingula anatina]
SMESG000068620.1	-1.38008	8.40854e-05	0.00222181	Down	Stk33	XP_029812828.1 serine/threonine-protein kinase 33 isoform X1 [Suricata suricatta]
SMESG000068743.1	-2.91276	3.06483e-23	3.73992e-20	Down	--	AIX99543.1 pmp-10, partial [Schmidtea mediterranea]
SMESG000068893.1	0.910529	0.011172	0.0870858	Up	TTBK1	CAF93339.1 unnamed protein product, partial [Tetraodon nigroviridis]
SMESG000068909.1	-0.816311	8.457e-06	0.000336849	Down	--	PAA57444.1 hypothetical protein BOX15_Mlig023060g3 [Macrostomum lignano]
SMESG000068931.1	0.827155	0.000650091	0.011713	Up	PTPRM	-
SMESG000069202.1	-1.23408	3.791e-11	6.82738e-09	Down	Mmp25	CCC86590.3 mmp protein [Schmidtea mediterranea]
SMESG000069225.1	1.35053	0.000143019	0.00347779	Up	Eif1	OON15579.1 translation initiation factor SUI1 [Opisthorchis viverrini]
SMESG000069673.1	0.834051	0.00736473	0.0659925	Up	--	AKN21505.1 slc16a-10 [Schmidtea mediterranea]
SMESG000069681.1	-0.893792	4.01281e-12	8.97733e-10	Down	--	AKN21505.1 slc16a-10 [Schmidtea mediterranea]
SMESG000069687.1	-0.89552	0.00565142	0.055493	Down	--	VZI39021.1 unnamed protein product [Sparganum proliferum]
SMESG000069753.1	0.868538	3.91625e-06	0.000176402	Up	Pgrmc2	XP_015251542.1 PREDICTED: membrane-associated progesterone receptor component 1 [Cyprinodon variegatus]
SMESG000069851.1	-0.814437	1.28524e-05	0.000468797	Down	Syne1	PAA68132.1 hypothetical protein BOX15_Mlig010703g1, partial [Macrostomum lignano]
SMESG000069905.1	-1.04604	1.52862e-09	1.86533e-07	Down	SLC39A1	AKN21678.1 slc39a-13 [Schmidtea mediterranea]
SMESG000070072.1	-1.35493	5.16332e-05	0.00147288	Down	--	-
SMESG000070078.1	0.885483	7.32172e-07	4.28721e-05	Up	PLOD1	THD23896.1 Procollagen-lysine 2-oxoglutarate 5-dioxygenase [Fasciola hepatica]
SMESG000070097.1	-0.986808	0.00183963	0.0253006	Down	KFase	XP_007886847.1 PREDICTED: kynurenine formamidase [Callorhinchus milii]
SMESG000070308.1	-1.26712	1.94147e-05	0.000656431	Down	--	XP_011431277.1 PREDICTED: cell wall protein PRY3 isoform X4 [Crassostrea gigas]
SMESG000070491.1	-1.64397	3.27057e-18	1.90874e-15	Down	--	XP_019630926.1 PREDICTED: Williams-Beuren syndrome chromosomal region 27 protein-like [Branchiostoma belcheri]
SMESG000070631.1	-0.911318	0.00814365	0.0710742	Down	TRPA1	XP_002741541.2 PREDICTED: transient receptor potential cation channel subfamily A member 1-like [Saccoglossus kowalevskii]
SMESG000070778.1	1.00684	9.94731e-05	0.00256282	Up	htr1aa	ANO38993.1 GCR011 [Schmidtea mediterranea]
SMESG000070969.1	-0.96922	0.00553386	0.0544982	Down	Ftcd	XP_013412376.1 formimidoyltransferase-cyclodeaminase [Lingula anatina]
SMESG000070985.1	-0.918078	8.99967e-07	5.07574e-05	Down	POSTN	THD27333.1 Gynecophoral canal protein [Fasciola hepatica]
SMESG000071063.1	-1.03015	0.00344196	0.0389557	Down	--	-
SMESG000071152.1	-0.866471	0.00403411	0.0433894	Down	--	QCC20039.1 Mp-2, partial [Schmidtea mediterranea]
SMESG000071232.1	-1.02215	0.00180471	0.0249482	Down	--	PAA78931.1 hypothetical protein BOX15_Mlig015448g3 [Macrostomum lignano]
SMESG000071424.1	-0.886357	0.00847317	0.0727673	Down	NIT2	XP_030762381.1 omega-amidase NIT2 [Sitophilus oryzae]
SMESG000071531.1	-0.965586	0.00208549	0.0278543	Down	hsp90ab1	ACM91724.1 90 kDa heat shock protein [Dugesia japonica]
SMESG000071533.1	-1.07378	0.00277202	0.033857	Down	hsp90ab1	ACM91724.1 90 kDa heat shock protein [Dugesia japonica]
SMESG000072026.1	-1.50072	1.28194e-05	0.000468797	Down	--	-
SMESG000072142.1	0.99077	2.02808e-07	1.3832e-05	Up	--	-
SMESG000072162.1	0.900281	2.51634e-06	0.000119353	Up	Lasp	RJW62346.1 Cysteine and glycine-rich protein 3 [Clonorchis sinensis]
SMESG000072467.1	0.864062	0.0132179	0.096758	Up	--	-
SMESG000072523.1	-1.18208	0.00353198	0.0395311	Down	--	QFQ66895.1 hypothetical protein [Schmidtea mediterranea]
SMESG000072690.1	0.840638	0.00596425	0.0573874	Up	PPIL1	QBH73002.1 putative mitochondrial ribosomal protein S24 [Thermobia domestica]
SMESG000072805.1	0.864031	0.0119047	0.0902805	Up	Mep1b	CCW36840.1 Ast2 protein [Schmidtea mediterranea]
SMESG000072902.1	0.801222	2.13197e-05	0.000703131	Up	PTEN	BAU21064.1 Hr-PTEN protein [Halocynthia roretzi]
SMESG000072936.1	1.82404	0.000874019	0.0143619	Up	Pi16	XP_030060290.1 cysteine-rich secretory protein 3-like isoform X2 [Microcaecilia unicolor]
SMESG000073115.1	-1.61524	1.79942e-08	1.65531e-06	Down	Adamtsl1	TPP63893.1 AdamTS protein 3 [Fasciola gigantica]
SMESG000073126.1	-1.26152	0.00527093	0.0526426	Down	--	-
SMESG000073508.1	-1.23553	0.000806512	0.0136517	Down	--	PAA57747.1 hypothetical protein BOX15_Mlig020596g1, partial [Macrostomum lignano]
SMESG000073666.1	-1.07532	2.02062e-05	0.000676378	Down	VWF	XP_022332232.1 apolipophorins-like [Crassostrea virginica]
SMESG000073869.1	1.24248	0.00189089	0.0259258	Up	--	-
SMESG000074007.1	2.53552	4.82432e-06	0.000212318	Up	Rap1	XP_011662785.1 GTP-binding protein Di-Ras2-like [Strongylocentrotus purpuratus]
SMESG000074066.1	-1.16115	4.19667e-05	0.00125741	Down	vdr	TGZ65983.1 hypothetical protein CRM22_005579 [Opisthorchis felineus]
SMESG000074187.1	7.30417	8.33411e-10	1.07566e-07	Up	LIPA	KAA3682135.1 lysosomal acid lipase/cholesteryl ester hydrolase [Paragonimus westermani]
SMESG000074204.1	1.98299	1.24139e-27	2.7772e-24	Up	acp4	QGW52012.1 lysosomal acid phosphatase [Dugesia japonica]
SMESG000074378.1	-1.28697	1.1386e-11	2.42594e-09	Down	--	AAW24762.1 SJCHGC04453 protein [Schistosoma japonicum]
SMESG000074437.1	1.3521	0.000753872	0.0129734	Up	cdk1-a	PAA61055.1 hypothetical protein BOX15_Mlig006145g1 [Macrostomum lignano]
SMESG000074521.1	-0.888741	0.000611762	0.0110969	Down	ASTL	XP_024347918.1 Zinc metalloproteinase nas-29 [Echinococcus granulosus]
SMESG000074522.1	-0.985355	1.77655e-12	4.25832e-10	Down	--	XP_013381370.1 balbiani ring protein 3 [Lingula anatina]
SMESG000074545.1	-1.36458	0.000522649	0.00981191	Down	RPL23A	XP_032877814.1 60S ribosomal protein L23a [Amblyraja radiata]
SMESG000074768.1	0.892398	4.83974e-08	4.01011e-06	Up	Mpped2	KAF1315825.1 hypothetical protein MS3_0015708 [Schistosoma haematobium]
SMESG000074843.1	1.53684	0.0137025	0.0988863	Up	--	XP_023226012.1 uncharacterized protein LOC111626755 [Centruroides sculpturatus]
SMESG000074977.1	0.85276	0.00738329	0.0660875	Up	CBG09545	XP_029180360.1 probable RNA-binding protein EIF1AD isoform X2 [Acropora millepora]
SMESG000074998.1	-0.803462	2.53074e-10	3.81687e-08	Down	GTPBP4	XP_031471845.1 nucleolar GTP-binding protein 1 [Phasianus colchicus]
SMESG000075160.1	1.09958	0.00884379	0.0751717	Up	--	XP_028368402.1 calcium-dependent phospholipase A2 [Phyllostomus discolor]
SMESG000075481.1	-1.16376	8.22016e-08	6.3051e-06	Down	--	XP_011497752.1 PREDICTED: lipid storage droplets surface-binding protein 2-like [Ceratosolen solmsi marchali]
SMESG000075495.1	1.23061	0.00594656	0.0573013	Up	--	-
SMESG000075918.1	-0.900985	3.00528e-08	2.65394e-06	Down	CLN3	TNN12998.1 Protein BTN1 [Schistosoma japonicum]
SMESG000076072.1	0.968803	5.8653e-07	3.48386e-05	Up	--	ANO38983.1 orphan chemoreceptor family protein [Schmidtea mediterranea]
SMESG000076123.1	-0.851155	0.000361422	0.00739537	Down	rgn	XP_011439356.1 PREDICTED: regucalcin [Crassostrea gigas]
SMESG000076155.1	-0.931358	0.000283132	0.00606137	Down	--	XP_025094505.1 uncharacterized protein LOC112564116 [Pomacea canaliculata]
SMESG000076175.1	1.00558	0.00528054	0.0526994	Up	--	-
SMESG000076363.1	-0.853504	0.00764416	0.0678622	Down	--	-
SMESG000076371.1	-0.827889	0.0117543	0.0894323	Down	--	-
SMESG000076464.1	-1.33809	2.19892e-07	1.49071e-05	Down	--	XP_028399817.1 sodium-dependent glucose transporter 1A-like [Dendronephthya gigantea]
SMESG000076519.1	-0.934959	0.00014258	0.00347777	Down	--	-
SMESG000076927.1	-3.13095	1.62682e-06	8.36658e-05	Down	--	-
SMESG000076994.1	-1.0284	0.00403165	0.0433894	Down	Gpd2	VDD79145.1 unnamed protein product [Mesocestoides corti]
SMESG000077040.1	1.05403	1.93942e-11	4.00505e-09	Up	--	AFJ24814.1 hypothetical protein [Schmidtea mediterranea]
SMESG000077092.1	0.920888	0.00406826	0.0435473	Up	PRKACA	TGZ55607.1 hypothetical protein CRM22_010367 [Opisthorchis felineus]
SMESG000077134.1	0.994351	5.35796e-06	0.000231254	Up	SLC47A1	AKN21702.1 slc47a-5 [Schmidtea mediterranea]
SMESG000077405.1	-1.52982	0.000190496	0.00440866	Down	RCN1	AAP05891.1 SJCHGC09235 protein [Schistosoma japonicum]
SMESG000077491.1	-1.37716	1.8885e-05	0.000645263	Down	Acmsd	XP_021377118.1 2-amino-3-carboxymuconate-6-semialdehyde decarboxylase-like isoform X1 [Mizuhopecten yessoensis]
SMESG000077591.1	0.878043	0.00267837	0.0331632	Up	rrb1	XP_025832576.1 LOW QUALITY PROTEIN: glutamate-rich WD repeat-containing protein 1 [Agrilus planipennis]
SMESG000077660.1	-1.18338	3.75614e-12	8.54553e-10	Down	--	ANO39113.1 GCR158 [Schmidtea mediterranea]
SMESG000077667.1	-1.54914	1.94871e-36	8.71918e-33	Down	--	-
SMESG000077798.1	-1.61447	0.00949571	0.078902	Down	Hn	XP_013396180.1 protein henna [Lingula anatina]
SMESG000077893.1	-1.07529	2.58755e-11	4.89192e-09	Down	Papss2	XP_022249145.1 bifunctional 3'-phosphoadenosine 5'-phosphosulfate synthase-like [Limulus polyphemus]
SMESG000078091.1	-0.825987	1.37814e-06	7.2544e-05	Down	Cyp2b1	QCQ73702.1 P450 2B-like protein [Dugesia japonica]
SMESG000078098.1	-0.93121	0.00191647	0.0262231	Down	Cyp2j6	QCQ73702.1 P450 2B-like protein [Dugesia japonica]
SMESG000078131.1	-1.08147	0.00453391	0.0471043	Down	--	-
SMESG000078177.1	-1.04731	3.81475e-11	6.82738e-09	Down	--	-
SMESG000078255.1	-0.970172	1.07707e-07	8.11038e-06	Down	loxl2a	VDP65370.1 unnamed protein product [Echinostoma caproni]
SMESG000078272.1	-1.31668	4.04584e-05	0.00121765	Down	CAM1	ACH46222.1 putative calmodulin variant 1 [Taeniopygia guttata]
SMESG000078291.1	0.997616	0.00663508	0.0615924	Up	--	XP_003386291.1 PREDICTED: dynein light chain Tctex-type 1-like [Amphimedon queenslandica]
SMESG000078507.1	-0.854396	6.34492e-06	0.00026615	Down	CLA4	OMJ89093.1 hypothetical protein SteCoe_8815 [Stentor coeruleus]
SMESG000078515.1	-0.882438	0.0125002	0.0930613	Down	--	PAA50500.1 hypothetical protein BOX15_Mlig022080g1 [Macrostomum lignano]
SMESG000078588.1	-1.09382	1.91764e-05	0.000650011	Down	--	AET43969.1 microsomal GST3, partial [Reishia clavigera]
SMESG000078886.1	1.17378	0.00328487	0.037848	Up	alphaTub84B	VZI38302.1 unnamed protein product [Sparganum proliferum]
SMESG000079004.1	-1.28271	6.3882e-06	0.00026713	Down	alphaTub84B	XP_015795966.1 tubulin alpha chain [Tetranychus urticae]
SMESG000079201.1	1.18539	0.0136531	0.0988488	Up	--	-
SMESG000079368.1	0.857432	0.0117911	0.0896219	Up	rrm2	AFJ24744.1 ribonucleoside diphosphate reductase subunit M2-2 [Schmidtea mediterranea]
SMESG000079512.1	-0.899467	1.01126e-10	1.69677e-08	Down	DTH-1	Q00400.2 RecName: Full=Homeobox protein DTH-1 [Girardia tigrina]
SMESG000079541.1	-0.846582	0.00257449	0.0322967	Down	--	-
SMESG000079579.1	1.15756	0.0129387	0.095374	Up	--	-
SMESG000079667.1	-2.33252	1.63723e-43	1.09883e-39	Down	SAMHD1	XP_031564011.1 deoxynucleoside triphosphate triphosphohydrolase SAMHD1-like [Actinia tenebrosa]
SMESG000080027.1	-0.839738	0.00290034	0.0348277	Down	FLI1	ARX11405.1 friend leukemia integration 1, partial [Schmidtea mediterranea]
SMESG000080290.1	1.75817	0.00478286	0.0489331	Up	--	-
SMESG000080294.1	2.72014	0.000203593	0.00464766	Up	--	-
SMESG000080295.1	-1.275	0.000100338	0.00258015	Down	SLC16A4	AKN21507.1 slc16a-12 [Schmidtea mediterranea]
SMESG000080447.1	0.908247	0.000310331	0.00651889	Up	--	-
SMESG000080530.1	1.10462	0.0136474	0.0988488	Up	--	-
SMESG000080769.1	-0.81013	0.0109677	0.0860425	Down	SPTLC1	CDS24021.1 serine palmitoyltransferase long chain base [Echinococcus granulosus]
SMESG000081143.1	1.63247	0.00224589	0.0294976	Up	--	-
SMESG000081190.1	-0.941245	5.54107e-05	0.00156139	Down	PGS1	XP_022313163.1 CDP-diacylglycerol--glycerol-3-phosphate 3-phosphatidyltransferase, mitochondrial-like isoform X1 [Crassostrea virginica]
SMESG000081293.1	1.83002	1.34562e-07	9.76342e-06	Up	Slc7a1	AKN21449.1 slc7a-5 [Schmidtea mediterranea]
SMESG000081526.1	-1.71952	2.55198e-19	1.90307e-16	Down	thnsl2	KAF0294793.1 Threonine synthase-like 2 [Amphibalanus amphitrite]
SMESG000081544.1	-1.00396	7.90367e-07	4.5338e-05	Down	THNSL2	XP_023351017.1 threonine synthase-like 2 [Sarcophilus harrisii]
SMESG000081649.1	1.20679	2.7971e-07	1.8226e-05	Up	--	-
SMESG000081829.1	0.876313	0.000166904	0.00396523	Up	CHRM1	ANO38999.1 GCR018 [Schmidtea mediterranea]

## Sheet: CHD4_3dpi_diff_gene
Transcriptome profiling at 3 dpi after depletion of CHD4
Gene_name	log2FoldChange	pvalue	padj	change	Symbol	Description
SMESG000029602.1	-1.70238	0.00035124	0.0307093	Down	--	AFJ24802.1 hypothetical protein, partial [Schmidtea mediterranea]
SMESG000043373.1	0.943993	0.00121761	0.0801615	Up	--	AHD24730.1 X1.C4.1 [Schmidtea mediterranea]
SMESG000051929.1	0.968368	6.49317e-09	3.1825e-06	Up	gatm	VDP77876.1 unnamed protein product [Echinostoma caproni]
SMESG000063471.1	1.28031	5.33056e-18	1.50228e-14	Up	Cp1	PAV61346.1 hypothetical protein WR25_18197 [Diploscapter pachys]
SMESG000067649.1	-1.27941	4.1414e-06	0.000808672	Down	--	VDD77796.1 unnamed protein product [Mesocestoides corti]
SMESG000068192.1	-1.93241	5.0931e-293	5.74145e-289	Down	CHD5	ADE34162.1 chromodomain helicase DNA-binding protein 4 [Schmidtea mediterranea]

## Sheet: CHD4_6dpi_diff_gene
Transcriptome profiling at 6 dpi after depletion of CHD4
Gene_name	log2FoldChange	pvalue	padj	change	Symbol	Description
SMESG000002858.1	1.03846	2.48995e-09	1.98669e-07	Up	--	XP_018645986.1 acid sensing ion channel 4, pituitary, putative [Schistosoma mansoni]
SMESG000003402.1	2.01276	4.11779e-14	6.00578e-12	Up	Cyp2u1	AWM96409.1 cytochrome P450 2K1-like protein [Dugesia japonica]
SMESG000005012.1	-0.837455	1.02002e-11	1.09806e-09	Down	RAC1	XP_032780679.1 ras-related C3 botulinum toxin substrate 1 [Daphnia magna]
SMESG000005474.1	-1.06227	1.51613e-07	8.78834e-06	Down	SLC47A1	AKN21701.1 slc47a-4, partial [Schmidtea mediterranea]
SMESG000006040.1	4.3847	4.89944e-117	3.3228e-113	Up	H2AJ	XP_025197454.1 histone H2A [Melanaphis sacchari]
SMESG000006121.1	-1.0268	3.58296e-15	5.71757e-13	Down	--	-
SMESG000006319.1	1.10019	3.63102e-05	0.00122409	Up	--	-
SMESG000007013.1	1.01313	0.000325378	0.0075702	Up	--	XP_022335585.1 tripartite motif-containing protein 2-like [Crassostrea virginica]
SMESG000007159.1	-1.22507	4.03388e-16	7.01481e-14	Down	--	-
SMESG000007315.1	1.02091	7.36617e-07	3.64652e-05	Up	--	-
SMESG000009878.1	-1.05267	8.3673e-11	7.56627e-09	Down	--	KAA0197228.1 Alpha-tocopherol transfer protein [Fasciolopsis buski]
SMESG000010599.1	-0.849351	1.2718e-07	7.53303e-06	Down	--	-
SMESG000010665.1	1.29373	1.58072e-11	1.6243e-09	Up	--	KAA0188900.1 hypothetical protein FBUS_02218 [Fasciolopsis buski]
SMESG000011359.1	0.801416	1.95625e-05	0.000703835	Up	--	-
SMESG000013744.1	-0.908214	0.00134402	0.0233415	Down	--	-
SMESG000014542.1	-0.957883	5.49984e-15	8.5747e-13	Down	--	-
SMESG000014554.1	-0.91245	5.38829e-05	0.00173603	Down	--	-
SMESG000014566.1	-1.06986	2.14651e-05	0.000766191	Down	--	-
SMESG000014578.1	-1.05929	1.2392e-05	0.000463044	Down	--	-
SMESG000014710.1	-1.856	3.14491e-98	8.53152e-95	Down	--	-
SMESG000014711.1	-1.08919	5.89992e-27	2.48441e-24	Down	--	-
SMESG000014759.1	1.03392	4.42156e-05	0.00145216	Up	Marf	XP_019894310.1 PREDICTED: transmembrane GTPase Marf isoform X3 [Musca domestica]
SMESG000014762.1	0.965463	1.30056e-11	1.37735e-09	Up	--	ODM94964.1 Transmembrane GTPase Marf [Orchesella cincta]
SMESG000014795.1	-1.26676	1.58301e-13	2.12594e-11	Down	--	-
SMESG000015726.1	2.33899	2.59224e-17	5.02303e-15	Up	--	VDQ07944.1 unnamed protein product [Trichobilharzia regenti]
SMESG000016720.1	-1.10044	1.57339e-25	6.02111e-23	Down	Nucb2	XP_031151094.1 nucleobindin-2 [Sander lucioperca]
SMESG000016757.1	0.996367	7.73736e-11	7.09119e-09	Up	--	-
SMESG000016995.1	1.08246	4.71481e-12	5.24194e-10	Up	--	XP_025083284.1 saxiphilin-like [Pomacea canaliculata]
SMESG000017016.1	-0.832957	3.86231e-41	4.02987e-38	Down	--	-
SMESG000018472.1	-1.02764	5.01654e-41	4.86031e-38	Down	--	-
SMESG000020864.1	-0.957007	4.01651e-06	0.000164096	Down	--	XP_005929372.1 PREDICTED: lipopolysaccharide-induced tumor necrosis factor-alpha factor homolog isoform X2 [Haplochromis burtoni]
SMESG000020904.1	-0.852838	0.000526216	0.0111351	Down	SLC25A10	AKN21587.1 slc25a-19 [Schmidtea mediterranea]
SMESG000021912.1	-0.873912	1.81678e-22	5.47618e-20	Down	--	XP_015351526.1 PREDICTED: COX assembly mitochondrial protein 2 homolog isoform X1 [Marmota marmota marmota]
SMESG000022049.1	-1.21268	1.39932e-44	2.10893e-41	Down	--	-
SMESG000022279.1	-0.893797	1.9689e-13	2.61825e-11	Down	ANPEP	AFJ24858.1 hypothetical protein, partial [Schmidtea mediterranea]
SMESG000022742.1	1.89084	2.57478e-16	4.53563e-14	Up	--	-
SMESG000022749.1	-1.25143	2.12329e-06	9.38119e-05	Down	--	ANP44406.1 epidermal growth factor Smed-egf-1 [Schmidtea mediterranea]
SMESG000023427.1	1.15337	1.10997e-07	6.6618e-06	Up	--	-
SMESG000023530.1	-0.827433	8.8315e-09	6.33812e-07	Down	CYP2C30	PAA79583.1 hypothetical protein BOX15_Mlig006662g3 [Macrostomum lignano]
SMESG000024476.1	1.21012	8.24784e-09	5.98255e-07	Up	--	-
SMESG000024663.1	1.18779	2.36774e-32	1.39635e-29	Up	--	XP_032782336.1 uncharacterized protein LOC116920275 [Daphnia magna]
SMESG000024833.1	-0.89828	3.98121e-23	1.248e-20	Down	INHBA	AGX01005.1 activin 1 [Schmidtea mediterranea]
SMESG000026714.1	1.08884	2.02234e-06	8.96439e-05	Up	--	-
SMESG000027979.1	-0.94257	1.6588e-31	8.99998e-29	Down	--	AFJ24740.1 hypothetical protein [Schmidtea mediterranea]
SMESG000028261.1	0.847963	5.52805e-07	2.85104e-05	Up	--	ADW66116.1 lectin-like protein, partial [Schmidtea mediterranea]
SMESG000028420.1	-0.907725	6.04434e-27	2.48441e-24	Down	--	-
SMESG000029089.1	-1.05517	2.08476e-13	2.74541e-11	Down	--	-
SMESG000029096.1	-0.926628	1.8562e-28	8.68192e-26	Down	--	AFJ24856.1 retinoblastoma binding protein-1 [Schmidtea mediterranea]
SMESG000029269.1	-1.14155	8.45443e-05	0.00245549	Down	slc20a1b	AKN21545.1 slc20a-2 [Schmidtea mediterranea]
SMESG000029574.1	1.68315	2.86864e-12	3.26977e-10	Up	--	-
SMESG000029581.1	1.37404	2.38334e-12	2.73963e-10	Up	--	-
SMESG000029612.1	-0.982531	8.90555e-10	7.45648e-08	Down	--	KAF2348572.1 Integrase catalytic core [Trinorchestia longiramus]
SMESG000032414.1	-0.839103	3.70908e-08	2.43043e-06	Down	--	-
SMESG000032426.1	-1.25651	7.15872e-07	3.55681e-05	Down	--	-
SMESG000033095.1	-2.07018	1.26958e-40	1.14804e-37	Down	SLC47A2	AKN21703.1 slc47a-6 [Schmidtea mediterranea]
SMESG000033518.1	-0.839007	3.9425e-09	3.00428e-07	Down	Trhde	AFJ24858.1 hypothetical protein, partial [Schmidtea mediterranea]
SMESG000033958.1	-0.983629	1.29597e-29	6.51059e-27	Down	--	XP_029185063.1 hercynylcysteine sulfoxide lyase-like [Acropora millepora]
SMESG000034829.1	-0.915542	8.20363e-24	2.714e-21	Down	--	-
SMESG000035035.1	-0.827165	0.00257919	0.0380676	Down	--	QFQ66892.1 hypothetical protein [Schmidtea mediterranea]
SMESG000035904.1	0.924027	9.24497e-10	7.69317e-08	Up	--	AFJ24813.1 GRB2 associated binding protein-1 [Schmidtea mediterranea]
SMESG000037418.1	-0.877583	1.70283e-35	1.35866e-32	Down	--	-
SMESG000038673.1	-1.1917	2.02249e-15	3.26583e-13	Down	--	-
SMESG000038687.1	-1.06932	1.34151e-20	3.36968e-18	Down	--	-
SMESG000040849.1	-1.11641	2.39623e-18	5.07852e-16	Down	slc52a3a	XP_023691021.1 solute carrier family 52, riboflavin transporter, member 3 [Paramormyrops kingsleyae]
SMESG000043277.1	-0.893549	4.75286e-22	1.34308e-19	Down	--	-
SMESG000046026.1	0.820584	0.000118848	0.00330339	Up	--	PAA68210.1 hypothetical protein BOX15_Mlig011922g1 [Macrostomum lignano]
SMESG000047829.1	-1.21465	1.13522e-33	8.55452e-31	Down	Sbno1	RWS02043.1 Protein strawberry notch-like protein [Dinothrombium tinctorium]
SMESG000051929.1	0.919244	2.36003e-08	1.60862e-06	Up	gatm	VDP77876.1 unnamed protein product [Echinostoma caproni]
SMESG000051953.1	-0.868663	1.1616e-43	1.5756e-40	Down	GATM	AQT19752.1 hypothetical protein Smed-agat-1 [Schmidtea mediterranea]
SMESG000051964.1	-0.872773	2.5474e-46	4.31911e-43	Down	GATM	AQT19752.1 hypothetical protein Smed-agat-1 [Schmidtea mediterranea]
SMESG000052758.1	2.34422	2.57706e-18	5.37773e-16	Up	his-4	AFJ24860.1 histone h2b-2, partial [Schmidtea mediterranea]
SMESG000053861.1	-0.930824	1.79494e-33	1.21733e-30	Down	--	-
SMESG000054351.1	3.05848	1.33215e-41	1.64267e-38	Up	H4-I	XP_033116238.1 uncharacterized protein LOC117116331 [Anneissia japonica]
SMESG000056235.1	-0.806798	1.57456e-20	3.81382e-18	Down	--	-
SMESG000056424.1	-1.50083	5.29944e-10	4.57845e-08	Down	--	AHD24730.1 X1.C4.1 [Schmidtea mediterranea]
SMESG000057252.1	-1.30366	9.57616e-67	2.16485e-63	Down	ABCC1	PAA88602.1 hypothetical protein BOX15_Mlig016190g1 [Macrostomum lignano]
SMESG000057502.1	0.814963	1.75877e-06	7.92557e-05	Up	--	-
SMESG000058546.1	1.58583	1.2988e-15	2.14841e-13	Up	--	-
SMESG000058949.1	1.99435	3.23556e-23	1.04493e-20	Up	--	-
SMESG000059813.1	1.17936	3.53726e-07	1.88154e-05	Up	--	-
SMESG000060680.1	-0.942776	3.80751e-19	8.75339e-17	Down	CYP3A24	XP_022343234.1 cytochrome P450 3A24-like [Crassostrea virginica]
SMESG000060981.1	-0.913267	1.64478e-06	7.47766e-05	Down	SLC10A3	AKN21468.1 slc10a-1 [Schmidtea mediterranea]
SMESG000061767.1	-0.926764	3.09454e-41	3.49786e-38	Down	--	-
SMESG000061797.1	-0.807735	1.86636e-08	1.30491e-06	Down	--	-
SMESG000062945.1	-0.846639	7.90731e-05	0.00231652	Down	--	-
SMESG000063471.1	2.95697	1.06774e-110	4.82761e-107	Up	Cp1	PAV61346.1 hypothetical protein WR25_18197 [Diploscapter pachys]
SMESG000063517.1	1.51416	1.5825e-12	1.8829e-10	Up	Cp1	PAA54736.1 hypothetical protein BOX15_Mlig002369g2 [Macrostomum lignano]
SMESG000064024.1	0.835124	0.000478852	0.0103098	Up	--	-
SMESG000066563.1	-0.842519	3.14011e-32	1.77469e-29	Down	daao-1	BAN78701.1 D-amino acid oxidase [Dugesia ryukyuensis]
SMESG000066596.1	1.26575	9.99434e-17	1.84059e-14	Up	--	-
SMESG000066997.1	1.50264	5.67391e-12	6.25699e-10	Up	--	ARM37835.1 synaptotagmin XV-like protein [Schmidtea mediterranea]
SMESG000067109.1	-0.964619	0.00065406	0.0131965	Down	--	KAE9534571.1 hypothetical protein AGLY_008661, partial [Aphis glycines]
SMESG000067906.1	1.17243	4.21234e-21	1.09877e-18	Up	his-48	AFJ24860.1 histone h2b-2, partial [Schmidtea mediterranea]
SMESG000068192.1	-2.01647	1.23453e-171	1.67452e-167	Down	CHD5	ADE34162.1 chromodomain helicase DNA-binding protein 4 [Schmidtea mediterranea]
SMESG000068583.1	1.03161	0.000430344	0.00946059	Up	--	-
SMESG000068877.1	-1.18135	5.18716e-15	8.18124e-13	Down	ELOVL	XP_011445953.1 PREDICTED: elongation of very long chain fatty acids protein 7 [Crassostrea gigas]
SMESG000069149.1	-1.49938	4.10791e-08	2.66954e-06	Down	--	-
SMESG000069796.1	-1.05083	9.11034e-15	1.38846e-12	Down	--	-
SMESG000069905.1	-0.91714	8.24399e-26	3.28887e-23	Down	SLC39A1	AKN21678.1 slc39a-13 [Schmidtea mediterranea]
SMESG000070491.1	-1.10809	2.45065e-24	8.31016e-22	Down	--	XP_019630926.1 PREDICTED: Williams-Beuren syndrome chromosomal region 27 protein-like [Branchiostoma belcheri]
SMESG000072142.1	-1.02288	3.95524e-17	7.55617e-15	Down	--	-
SMESG000073407.1	1.19794	2.35705e-19	5.51224e-17	Up	DNAH10	VDD74852.1 unnamed protein product [Mesocestoides corti]
SMESG000073430.1	1.02853	5.87125e-06	0.000233542	Up	DNAH10	THD27356.1 Dynein heavy chain [Fasciola hepatica]
SMESG000074007.1	0.958653	0.000101293	0.00286236	Up	Rap1	XP_011662785.1 GTP-binding protein Di-Ras2-like [Strongylocentrotus purpuratus]
SMESG000074226.1	-0.825611	7.70967e-07	3.80269e-05	Down	Abcc1	XP_022323795.1 multidrug resistance-associated protein 1-like isoform X2 [Crassostrea virginica]
SMESG000074479.1	4.48716	3.27571e-103	1.11079e-99	Up	H3-I	XP_018646598.1 histone H3, putative [Schistosoma mansoni]
SMESG000075938.1	-0.870356	5.51713e-09	4.11178e-07	Down	--	AKN21558.1 slc22a-10 [Schmidtea mediterranea]
SMESG000076072.1	0.913048	1.88973e-17	3.71482e-15	Up	--	ANO38983.1 orphan chemoreceptor family protein [Schmidtea mediterranea]
SMESG000077491.1	-1.14221	6.80873e-19	1.51399e-16	Down	Acmsd	XP_021377118.1 2-amino-3-carboxymuconate-6-semialdehyde decarboxylase-like isoform X1 [Mizuhopecten yessoensis]
SMESG000077659.1	0.930858	5.78433e-05	0.00182039	Up	DUR3	XP_009065706.1 hypothetical protein LOTGIDRAFT_169159 [Lottia gigantea]
SMESG000077669.1	0.815538	1.77182e-16	3.16223e-14	Up	--	PAA59456.1 hypothetical protein BOX15_Mlig034563g2 [Macrostomum lignano]
SMESG000079712.1	-1.18727	2.35615e-31	1.22919e-28	Down	--	C0HKB8.1 RecName: Full=Acidic phospholipase A2; Short=MdumPLA2; Short=svPLA2; AltName: Full=Phosphatidylcholine 2-acylhydrolase [Micrurus dumerilii]
SMESG000080295.1	-1.28318	3.96994e-09	3.00829e-07	Down	SLC16A4	AKN21507.1 slc16a-12 [Schmidtea mediterranea]
SMESG000081649.1	1.536	2.6277e-11	2.60161e-09	Up	--	-
SMESG000081746.1	1.15921	5.23483e-07	2.73097e-05	Up	--	THD19475.1 hypothetical protein D915_009859 [Fasciola hepatica]

## Sheet: CHD4_9dpi_diff_gene
Transcriptome profiling at 9 dpi after depletion of CHD4
Gene_name	log2FoldChange	pvalue	padj	change	Symbol	Description
SMESG000000110.1	-0.963079	5.43602e-06	3.59983e-05	Down	svopl	OAF72203.1 putative transporter SVOPL [Intoshia linei]
SMESG000000212.1	-1.23516	7.33987e-40	3.9346e-38	Down	Gs2	XP_013778191.1 glutamine synthetase-like [Limulus polyphemus]
SMESG000000219.1	-1.74606	1.98027e-47	1.287e-45	Down	--	-
SMESG000000228.1	-1.1487	2.40818e-16	4.56994e-15	Down	GLUL	XP_031764979.1 zinc finger MYM-type protein 1-like [Galleria mellonella]
SMESG000000245.1	-1.09535	1.91511e-05	0.000116092	Down	ABCC1	XP_009055361.1 hypothetical protein LOTGIDRAFT_105097, partial [Lottia gigantea]
SMESG000000273.1	-0.943897	1.53662e-37	7.72942e-36	Down	ABCC1	PAA84816.1 hypothetical protein BOX15_Mlig012583g1 [Macrostomum lignano]
SMESG000000381.1	-1.21273	1.89526e-58	1.62793e-56	Down	--	-
SMESG000000601.1	-1.02041	2.46391e-19	5.51676e-18	Down	--	XP_011448530.1 PREDICTED: uncharacterized protein LOC105343036 isoform X1 [Crassostrea gigas]
SMESG000000602.1	-1.09526	2.14197e-05	0.00012894	Down	CIPK19	XP_030829881.1 uncharacterized protein LOC100892171 [Strongylocentrotus purpuratus]
SMESG000000713.1	-0.862043	9.78894e-06	6.23233e-05	Down	unc-9	XP_013415367.1 uncharacterized protein LOC106177207 [Lingula anatina]
SMESG000000812.1	0.965838	5.27191e-22	1.37294e-20	Up	--	VDO81743.1 unnamed protein product, partial [Schistosoma margrebowiei]
SMESG000000833.1	0.830194	0.0225433	0.0637129	Up	--	-
SMESG000000959.1	1.08941	9.2617e-06	5.93266e-05	Up	--	AFJ24724.1 early growth response-3 [Schmidtea mediterranea]
SMESG000000960.1	1.23344	5.79264e-07	4.46626e-06	Up	--	AEI69697.1 EGR-like protein 1 [Schmidtea mediterranea]
SMESG000001254.1	0.911069	0.00474933	0.0168742	Up	--	-
SMESG000001471.1	-1.5158	2.47506e-08	2.30379e-07	Down	--	-
SMESG000001565.1	-1.39741	1.32914e-41	7.50861e-40	Down	TRAF3	XP_014346563.1 PREDICTED: TNF receptor-associated factor 3-like isoform X2 [Latimeria chalumnae]
SMESG000001708.1	-0.925761	2.35006e-70	2.63494e-68	Down	ALDH2	TGZ74088.1 hypothetical protein CRM22_001133 [Opisthorchis felineus]
SMESG000001727.1	-1.66644	2.5286e-45	1.594e-43	Down	--	-
SMESG000002217.1	-1.0463	0.012122	0.0378745	Down	--	-
SMESG000002416.1	-1.29266	2.62453e-31	1.07679e-29	Down	--	XP_011261479.1 transmembrane channel-like protein 1 [Camponotus floridanus]
SMESG000002694.1	-1.19607	6.9564e-96	1.36234e-93	Down	HAL	XP_002594930.1 hypothetical protein BRAFLDRAFT_209115 [Branchiostoma floridae]
SMESG000002805.1	-0.833487	5.99767e-29	2.20786e-27	Down	EH1	XP_013789374.2 epoxide hydrolase 1-like [Limulus polyphemus]
SMESG000002831.1	1.51682	1.89638e-27	6.67962e-26	Up	TMPRSS3	XP_013390346.1 bone morphogenetic protein 1 [Lingula anatina]
SMESG000002858.1	1.73217	1.3714e-36	6.71436e-35	Up	--	XP_018645986.1 acid sensing ion channel 4, pituitary, putative [Schistosoma mansoni]
SMESG000002890.1	-1.01737	5.68055e-45	3.5205e-43	Down	--	XP_009064757.1 hypothetical protein LOTGIDRAFT_168623 [Lottia gigantea]
SMESG000002907.1	-0.81853	8.57581e-12	1.15561e-10	Down	--	-
SMESG000003087.1	-1.48599	2.21923e-71	2.58698e-69	Down	gst-3	AFJ24753.1 glutathione S transferase-1 [Schmidtea mediterranea]
SMESG000003090.1	-1.09894	1.32875e-30	5.21836e-29	Down	ATP11B	XP_013406304.1 probable phospholipid-transporting ATPase IF [Lingula anatina]
SMESG000003379.1	1.15758	6.98024e-06	4.5466e-05	Up	ama-1	AQT19782.1 hypothetical protein Smed-rpb1 [Schmidtea mediterranea]
SMESG000003566.1	-0.803637	1.39039e-30	5.44588e-29	Down	--	AHD24733.1 1.C5.1 [Schmidtea mediterranea]
SMESG000003917.1	0.859759	0.0009045	0.00390859	Up	FLT1	VDK20052.1 unnamed protein product [Taenia asiatica]
SMESG000004032.1	-1.34726	3.72293e-08	3.38764e-07	Down	--	-
SMESG000004065.1	-1.76653	4.97312e-48	3.26095e-46	Down	loxl2a	OON21833.1 scavenger receptor cysteine-rich domain protein [Opisthorchis viverrini]
SMESG000004138.1	0.829738	5.03431e-05	0.000282877	Up	Trpv5	PAA93433.1 hypothetical protein BOX15_Mlig006500g2 [Macrostomum lignano]
SMESG000004200.1	-1.07802	6.65634e-31	2.64955e-29	Down	let-23	ANP44414.1 epidermal growth factor receptor Smed-egfr-2 [Schmidtea mediterranea]
SMESG000004201.1	-1.08295	1.78178e-21	4.54353e-20	Down	V-ERBB	ANP44414.1 epidermal growth factor receptor Smed-egfr-2 [Schmidtea mediterranea]
SMESG000004302.1	0.835674	1.53874e-11	2.02882e-10	Up	--	XP_002422856.1 conserved hypothetical protein [Pediculus humanus corporis]
SMESG000004344.1	-0.942837	1.48111e-08	1.41539e-07	Down	Mpc2	XP_013777673.1 mitochondrial pyruvate carrier 2-like [Limulus polyphemus]
SMESG000004630.1	-0.900123	0.000666681	0.00297184	Down	--	XP_018645073.1 Venom allergen-like (VAL) 14 protein [Schistosoma mansoni]
SMESG000004815.1	-0.884351	1.33046e-16	2.57806e-15	Down	--	XP_001621535.1 monoglyceride lipase [Nematostella vectensis]
SMESG000004840.1	1.48136	6.20956e-18	1.30668e-16	Up	EGR4	AFJ24725.1 early growth response-2, partial [Schmidtea mediterranea]
SMESG000004884.1	1.91969	1.97433e-11	2.55723e-10	Up	--	-
SMESG000005010.1	-0.87366	5.58915e-46	3.53851e-44	Down	RAC1	ELU15297.1 hypothetical protein CAPTEDRAFT_171205 [Capitella teleta]
SMESG000005012.1	-2.03536	1.34517e-73	1.66033e-71	Down	RAC1	XP_032780679.1 ras-related C3 botulinum toxin substrate 1 [Daphnia magna]
SMESG000005013.1	-0.849433	4.05227e-24	1.18565e-22	Down	RAC1	TMS36896.1 hypothetical protein L596_003957 [Steinernema carpocapsae]
SMESG000005050.1	-0.947355	2.20869e-54	1.70743e-52	Down	Gaa	ELU15628.1 hypothetical protein CAPTEDRAFT_167453 [Capitella teleta]
SMESG000005380.1	0.802037	1.8603e-07	1.52478e-06	Up	--	-
SMESG000005441.1	-1.63441	2.39887e-14	3.97329e-13	Down	--	-
SMESG000005474.1	-2.8734	6.16904e-30	2.36582e-28	Down	SLC47A1	AKN21701.1 slc47a-4, partial [Schmidtea mediterranea]
SMESG000005476.1	-1.76775	1.08357e-11	1.44818e-10	Down	slc47a1	AKN21701.1 slc47a-4, partial [Schmidtea mediterranea]
SMESG000005477.1	-1.23218	7.83257e-51	5.66723e-49	Down	slc47a1	AKN21701.1 slc47a-4, partial [Schmidtea mediterranea]
SMESG000005599.1	-1.05571	4.3255e-19	9.59711e-18	Down	SPAC17G8.11c	PAA77440.1 hypothetical protein BOX15_Mlig019369g1 [Macrostomum lignano]
SMESG000005712.1	-1.01086	4.55172e-24	1.32914e-22	Down	Ace	AFJ24765.1 angiotensin converting enzyme-1, partial [Schmidtea mediterranea]
SMESG000005887.1	0.838284	2.74957e-06	1.92772e-05	Up	Trpv5	PAA51640.1 hypothetical protein BOX15_Mlig012503g1 [Macrostomum lignano]
SMESG000006014.1	1.14283	0.000348757	0.00165137	Up	PKM	PAA65922.1 hypothetical protein BOX15_Mlig019710g1, partial [Macrostomum lignano]
SMESG000006038.1	-1.55023	6.24354e-40	3.35916e-38	Down	--	AFJ24832.1 hypothetical protein, partial [Schmidtea mediterranea]
SMESG000006040.1	4.85532	1.3766e-154	5.61654e-152	Up	H2AJ	XP_025197454.1 histone H2A [Melanaphis sacchari]
SMESG000006139.1	-1.33307	2.01569e-15	3.61054e-14	Down	--	-
SMESG000006721.1	-1.15426	4.36653e-26	1.4445e-24	Down	Slc7a11	AKN21452.1 slc7a-8 [Schmidtea mediterranea]
SMESG000006935.1	1.13394	0.00330406	0.0123149	Up	--	-
SMESG000007013.1	1.12961	8.88471e-06	5.71861e-05	Up	--	XP_022335585.1 tripartite motif-containing protein 2-like [Crassostrea virginica]
SMESG000007031.1	0.881265	0.015134	0.0458044	Up	--	AKN21521.1 slc16a-26 [Schmidtea mediterranea]
SMESG000007063.1	2.03917	3.8385e-10	4.36e-09	Up	--	XP_032238693.1 uncharacterized protein LOC116618741, partial [Nematostella vectensis]
SMESG000007137.1	0.888328	9.07851e-08	7.80709e-07	Up	Shaw	XP_006823928.1 PREDICTED: potassium voltage-gated channel protein Shaw-like [Saccoglossus kowalevskii]
SMESG000007145.1	-0.873002	4.72629e-83	6.80585e-81	Down	--	-
SMESG000007159.1	-2.72422	4.26252e-50	2.99059e-48	Down	--	-
SMESG000007190.1	1.02538	0.0234932	0.0657773	Up	--	-
SMESG000007315.1	1.9316	1.71483e-26	5.7902e-25	Up	--	-
SMESG000007684.1	0.843978	3.61361e-40	1.95135e-38	Up	--	KAE9546932.1 hypothetical protein FO519_009856, partial [Halicephalobus sp. NKZ332]
SMESG000007895.1	-1.52907	1.12618e-12	1.64264e-11	Down	DWF5	XP_013403763.1 7-dehydrocholesterol reductase [Lingula anatina]
SMESG000007996.1	1.17247	1.73347e-07	1.4304e-06	Up	--	-
SMESG000008042.1	-1.67628	5.01337e-166	2.37537e-163	Down	--	PAA59456.1 hypothetical protein BOX15_Mlig034563g2 [Macrostomum lignano]
SMESG000008043.1	-1.52364	4.46898e-213	3.12573e-210	Down	--	PAA47666.1 hypothetical protein BOX15_Mlig027093g2, partial [Macrostomum lignano]
SMESG000008520.1	-1.18151	1.46407e-07	1.22601e-06	Down	--	-
SMESG000008541.1	-0.94655	2.29378e-36	1.10462e-34	Down	Apeh	XP_009049577.1 hypothetical protein LOTGIDRAFT_201138 [Lottia gigantea]
SMESG000008774.1	-1.82505	3.7084e-11	4.6956e-10	Down	--	-
SMESG000008797.1	-2.53549	1.42674e-165	6.54873e-163	Down	w	PAA63095.1 hypothetical protein BOX15_Mlig012313g3 [Macrostomum lignano]
SMESG000008854.1	1.74712	1.78e-07	1.46305e-06	Up	--	ANO39115.1 GCR160 [Schmidtea mediterranea]
SMESG000008937.1	-1.01639	2.17257e-34	1.00348e-32	Down	--	XP_013413002.1 uncharacterized protein LOC106175503 [Lingula anatina]
SMESG000008996.1	-1.01049	0.0118664	0.037156	Down	--	-
SMESG000009051.1	-1.19634	2.60192e-12	3.67118e-11	Down	--	-
SMESG000009351.1	1.14444	0.00110885	0.00467607	Up	--	-
SMESG000009387.1	-1.28781	3.11886e-06	2.1639e-05	Down	slc32a1	AKN21634.1 slc32a-1 [Schmidtea mediterranea]
SMESG000009493.1	-2.74798	2.24312e-71	2.59425e-69	Down	Slc49a3	XP_026186447.1 solute carrier family 49 member A3 [Mastacembelus armatus]
SMESG000009496.1	0.90689	0.000548422	0.00249002	Up	nt5c2	KAF1324515.1 putative cytosolic purine 5-nucleotidase [Schistosoma haematobium]
SMESG000009561.1	-1.35337	4.30256e-07	3.37898e-06	Down	--	XP_022625709.1 TNF receptor-associated factor 2-like isoform X2 [Seriola dumerili]
SMESG000009665.1	-1.53818	5.95031e-35	2.81023e-33	Down	ELOVL	XP_029644480.1 elongation of very long chain fatty acids protein AAEL008004-like [Octopus vulgaris]
SMESG000009674.1	-1.36196	3.35846e-24	9.90544e-23	Down	RDH13	XP_017107897.1 PREDICTED: retinol dehydrogenase 12-like [Drosophila bipectinata]
SMESG000009863.1	0.90171	4.15923e-06	2.80105e-05	Up	--	KAA3682369.1 uncharacterized protein DEA37_0006189 [Paragonimus westermani]
SMESG000009876.1	-0.805013	7.83918e-42	4.46286e-40	Down	--	KAA0197228.1 Alpha-tocopherol transfer protein [Fasciolopsis buski]
SMESG000009878.1	-2.08808	1.26542e-30	4.98296e-29	Down	--	KAA0197228.1 Alpha-tocopherol transfer protein [Fasciolopsis buski]
SMESG000009894.1	0.93318	1.26158e-10	1.51886e-09	Up	SIX3	AFJ24873.1 six3-1, partial [Schmidtea mediterranea]
SMESG000009911.1	-1.09038	1.71949e-48	1.15852e-46	Down	PGGHG	RJW66951.1 Acid trehalase-like protein 1 [Clonorchis sinensis]
SMESG000010407.1	-1.52915	8.97747e-32	3.77825e-30	Down	Arhgef11	XP_022246497.1 pleckstrin homology domain-containing family G member 5-like isoform X3 [Limulus polyphemus]
SMESG000010434.1	-0.941545	8.94623e-05	0.000481379	Down	--	XP_011423711.1 PREDICTED: coiled-coil domain-containing protein 92 [Crassostrea gigas]
SMESG000010464.1	-1.26126	3.50282e-34	1.59781e-32	Down	--	XP_029652974.1 E3 ubiquitin-protein ligase MIB2-like [Octopus vulgaris]
SMESG000010564.1	-1.03395	1.79545e-33	7.91939e-32	Down	--	-
SMESG000010599.1	-2.45837	2.18834e-44	1.31731e-42	Down	--	-
SMESG000010604.1	-2.07871	1.9551e-31	8.13501e-30	Down	--	-
SMESG000010665.1	1.81014	3.54225e-25	1.1141e-23	Up	--	KAA0188900.1 hypothetical protein FBUS_02218 [Fasciolopsis buski]
SMESG000010795.1	0.867838	1.5128e-08	1.4438e-07	Up	P2RX4	VDN99122.1 unnamed protein product [Rodentolepis nana]
SMESG000010944.1	-1.21443	4.13871e-23	1.14697e-21	Down	--	-
SMESG000011194.1	1.21373	7.1673e-20	1.6558e-18	Up	--	-
SMESG000011215.1	2.12713	1.44002e-95	2.78303e-93	Up	--	-
SMESG000011359.1	1.56412	3.63589e-21	9.11331e-20	Up	--	-
SMESG000011554.1	-0.958167	0.022783	0.0642666	Down	--	AKQ63011.1 orphan G-protein coupled receptor 1 [Platynereis dumerilii]
SMESG000011555.1	-1.09	0.00382339	0.014008	Down	--	XP_013415590.1 C5a anaphylatoxin chemotactic receptor 1 [Lingula anatina]
SMESG000011684.1	0.838162	0.00016729	0.000851112	Up	--	-
SMESG000012127.1	1.59592	1.22626e-182	6.92742e-180	Up	sepA	Q8T2I8.1 RecName: Full=Serine/threonine-protein kinase sepA; AltName: Full=Septase A [Dictyostelium discoideum]
SMESG000012131.1	1.60214	4.40924e-52	3.30423e-50	Up	sepA	Q8T2I8.1 RecName: Full=Serine/threonine-protein kinase sepA; AltName: Full=Septase A [Dictyostelium discoideum]
SMESG000012339.1	-1.21936	2.79608e-24	8.28023e-23	Down	--	AYA22141.1 TNF receptor-associated factor 3 [Mytilus coruscus]
SMESG000012534.1	-1.00829	4.64037e-82	6.61726e-80	Down	CYP1A1	XP_019642124.1 PREDICTED: cytochrome P450 1A1-like [Branchiostoma belcheri]
SMESG000012972.1	-0.826103	2.3667e-34	1.08631e-32	Down	dstyk	XP_027236014.1 dual serine/threonine and tyrosine protein kinase-like [Penaeus vannamei]
SMESG000012973.1	-0.833263	1.51124e-36	7.37443e-35	Down	DSTYK	PAA55491.1 hypothetical protein BOX15_Mlig027899g3 [Macrostomum lignano]
SMESG000013144.1	0.982644	0.0123229	0.0383933	Up	--	-
SMESG000013266.1	1.14604	4.67823e-14	7.60951e-13	Up	--	-
SMESG000013622.1	-1.30495	2.70033e-51	1.97326e-49	Down	slc5a9	AKN21417.1 slc5a-2 [Schmidtea mediterranea]
SMESG000013689.1	-0.970592	1.04349e-61	9.63949e-60	Down	slc9a3	AKN21460.1 slc9a-1 [Schmidtea mediterranea]
SMESG000013744.1	-0.860546	0.00284535	0.0107991	Down	--	-
SMESG000013783.1	-1.01155	1.34543e-24	4.03299e-23	Down	Cyp3a9	AAC52582.1 cytochrome P450 3A9 [Rattus norvegicus]
SMESG000013825.1	0.905717	0.00198075	0.00784606	Up	--	KRX25311.1 Gag-Pro-Pol polyprotein [Trichinella nelsoni]
SMESG000014399.1	-1.33534	5.05132e-25	1.55543e-23	Down	--	OMJ70210.1 hypothetical protein SteCoe_31865 [Stentor coeruleus]
SMESG000014523.1	-1.36351	1.8798e-26	6.30377e-25	Down	--	-
SMESG000014542.1	-2.03641	5.01857e-57	4.14117e-55	Down	--	-
SMESG000014544.1	-1.56296	2.7489e-20	6.48088e-19	Down	--	-
SMESG000014554.1	-2.16276	4.55139e-19	1.00527e-17	Down	--	-
SMESG000014566.1	-1.73364	3.28146e-09	3.37758e-08	Down	--	-
SMESG000014578.1	-1.84969	1.94668e-11	2.52364e-10	Down	--	-
SMESG000014710.1	-3.29783	0	0	Down	--	-
SMESG000014711.1	-1.80402	1.08357e-56	8.69701e-55	Down	--	-
SMESG000014730.1	-2.99268	2.59749e-34	1.18853e-32	Down	TRAF3	AFJ24792.1 TNF receptor associated factor-2, partial [Schmidtea mediterranea]
SMESG000014759.1	1.81306	8.61915e-20	1.98116e-18	Up	Marf	XP_019894310.1 PREDICTED: transmembrane GTPase Marf isoform X3 [Musca domestica]
SMESG000014761.1	1.58838	1.16724e-34	5.42544e-33	Up	--	KFM65406.1 Transmembrane GTPase Marf, partial [Stegodyphus mimosarum]
SMESG000014762.1	2.22034	8.29305e-80	1.13839e-77	Up	--	ODM94964.1 Transmembrane GTPase Marf [Orchesella cincta]
SMESG000014780.1	-1.19237	0.000143758	0.000739688	Down	--	XP_011403816.1 PREDICTED: TNF receptor-associated factor 4-like [Amphimedon queenslandica]
SMESG000014795.1	-3.54957	1.13382e-44	6.91017e-43	Down	--	-
SMESG000014932.1	-0.862639	1.23339e-08	1.18871e-07	Down	--	-
SMESG000014996.1	-1.40014	2.48217e-21	6.29673e-20	Down	--	XP_027041482.1 TNF receptor-associated factor 5-like [Pocillopora damicornis]
SMESG000015143.1	-0.852034	1.66904e-66	1.6791e-64	Down	FABP4	XP_032877086.1 fatty acid-binding protein, brain [Amblyraja radiata]
SMESG000015162.1	-1.05987	1.94854e-85	3.07744e-83	Down	MCOLN3	BAP40094.1 transient receptor potential ion channel ML a, partial [Dugesia japonica]
SMESG000015175.1	-2.37683	1.21706e-63	1.1533e-61	Down	--	-
SMESG000015187.1	-1.2	1.9032e-19	4.29403e-18	Down	RAC1	XP_023035974.1 ras-like GTP-binding protein RhoL [Drosophila willistoni]
SMESG000015726.1	2.77517	8.99173e-22	2.31297e-20	Up	--	VDQ07944.1 unnamed protein product [Trichobilharzia regenti]
SMESG000015806.1	-1.05287	4.8601e-07	3.783e-06	Down	--	-
SMESG000015807.1	-1.6651	4.85124e-08	4.33425e-07	Down	--	-
SMESG000016036.1	-0.819989	5.89651e-24	1.71162e-22	Down	rab-11.1	KAF0979410.1 hypothetical protein FDP41_001753 [Naegleria fowleri]
SMESG000016088.1	-2.32289	0	0	Down	PRSS12	PAA71212.1 hypothetical protein BOX15_Mlig019787g1 [Macrostomum lignano]
SMESG000016089.1	-2.26835	0	0	Down	PRSS12	PAA71212.1 hypothetical protein BOX15_Mlig019787g1 [Macrostomum lignano]
SMESG000016189.1	-0.992291	1.7424e-38	8.94837e-37	Down	tmem41aa	XP_014681253.1 PREDICTED: transmembrane protein 41A-like [Priapulus caudatus]
SMESG000016213.1	-0.927117	7.9675e-15	1.36873e-13	Down	NAGA	XP_973373.1 PREDICTED: alpha-N-acetylgalactosaminidase isoform X2 [Tribolium castaneum]
SMESG000016373.1	-0.962892	4.1035e-05	0.000234522	Down	--	-
SMESG000016389.1	-0.853503	3.67757e-64	3.53047e-62	Down	--	XP_022090273.1 ribonuclease Oy-like isoform X1 [Acanthaster planci]
SMESG000016407.1	-0.866798	1.78285e-16	3.41414e-15	Down	--	XP_021351011.1 uncharacterized protein LOC110448862 isoform X2 [Mizuhopecten yessoensis]
SMESG000016663.1	-0.989266	4.00269e-11	5.04648e-10	Down	--	-
SMESG000016714.1	0.903172	6.40306e-08	5.64854e-07	Up	--	ANO39112.1 GCR157 [Schmidtea mediterranea]
SMESG000016720.1	-1.62055	1.19229e-65	1.17532e-63	Down	Nucb2	XP_031151094.1 nucleobindin-2 [Sander lucioperca]
SMESG000016772.1	1.30705	1.46853e-30	5.73664e-29	Up	--	-
SMESG000016777.1	0.968958	1.23554e-33	5.49926e-32	Up	--	-
SMESG000016780.1	1.07864	3.78046e-37	1.87592e-35	Up	--	-
SMESG000016782.1	0.906581	3.71143e-13	5.61995e-12	Up	--	-
SMESG000016789.1	0.913409	0.000379029	0.00177922	Up	--	-
SMESG000016810.1	1.15589	2.47288e-135	8.25491e-133	Up	--	-
SMESG000016811.1	1.13225	9.12205e-25	2.77977e-23	Up	--	-
SMESG000016872.1	-0.983771	6.57157e-12	8.94561e-11	Down	rskn-1	OMJ72106.1 hypothetical protein SteCoe_29537 [Stentor coeruleus]
SMESG000016874.1	0.962286	7.59665e-16	1.40175e-14	Up	--	-
SMESG000016956.1	0.942346	0.000549419	0.00249224	Up	--	-
SMESG000016995.1	2.03141	1.3059e-57	1.0916e-55	Up	--	XP_025083284.1 saxiphilin-like [Pomacea canaliculata]
SMESG000017013.1	-1.64328	2.53994e-56	2.01657e-54	Down	--	-
SMESG000017016.1	-1.40359	2.81398e-147	1.03329e-144	Down	--	-
SMESG000017098.1	-1.03819	4.16624e-17	8.42888e-16	Down	--	-
SMESG000017126.1	-0.941844	0.00473303	0.0168204	Down	--	-
SMESG000017135.1	-1.00977	1.11712e-31	4.67472e-30	Down	--	-
SMESG000017142.1	-0.871703	4.22998e-25	1.31631e-23	Down	Nucb2	ASK86275.1 nucleobindin nesfatin precursor, partial [Ophionotus victoriae]
SMESG000017203.1	-1.35361	1.68917e-49	1.16481e-47	Down	--	VDN98900.1 unnamed protein product [Rodentolepis nana]
SMESG000017211.1	-0.853968	7.35925e-36	3.53244e-34	Down	ANP2	XP_023801697.1 serine/threonine-protein kinase PAK 3-like [Cyanistes caeruleus]
SMESG000017213.1	-1.50009	1.86595e-66	1.85183e-64	Down	--	XP_033110386.1 leucine-rich melanocyte differentiation-associated protein-like [Anneissia japonica]
SMESG000017214.1	-1.08626	4.84168e-38	2.45223e-36	Down	--	KAA3676080.1 uncharacterized protein DEA37_0012169 [Paragonimus westermani]
SMESG000017517.1	-0.92858	1.43389e-11	1.89738e-10	Down	MACF1	XP_019922392.1 PREDICTED: microtubule-actin cross-linking factor 1, isoforms 1/2/3/5 isoform X8 [Crassostrea gigas]
SMESG000017519.1	-0.927934	4.73192e-54	3.63887e-52	Down	--	XP_013080792.1 PREDICTED: microtubule-actin cross-linking factor 1-like isoform X1 [Biomphalaria glabrata]
SMESG000017520.1	-0.977	8.05923e-20	1.85539e-18	Down	--	-
SMESG000017960.1	0.823742	0.0142096	0.0433189	Up	--	XP_012800712.1 MKL/myocardin-like protein 1 [Schistosoma haematobium]
SMESG000018042.1	-1.34057	5.52532e-34	2.50481e-32	Down	oxlT	AKN21500.1 slc16a-5, partial [Schmidtea mediterranea]
SMESG000018404.1	0.874325	3.73382e-25	1.16935e-23	Up	TRAF5	ADF47430.1 TNF receptor-associated factor-2-like protein B [Dugesia japonica]
SMESG000018453.1	1.52515	2.37753e-10	2.76275e-09	Up	Plg	AFJ24868.1 plasminogen-1, partial [Schmidtea mediterranea]
SMESG000018472.1	-2.27291	0	0	Down	--	-
SMESG000018666.1	0.923021	6.95906e-22	1.79324e-20	Up	BOLL	ANE21796.1 boule 1 RNA-binding protein [Schmidtea mediterranea]
SMESG000018708.1	-2.03125	4.89253e-84	7.33281e-82	Down	--	PAA47753.1 hypothetical protein BOX15_Mlig014729g1 [Macrostomum lignano]
SMESG000018759.1	-1.0571	7.02381e-16	1.29932e-14	Down	Hsd17b13	XP_013380984.1 epidermal retinol dehydrogenase 2 isoform X1 [Lingula anatina]
SMESG000018798.1	-1.67118	1.21076e-29	4.58341e-28	Down	--	-
SMESG000019113.1	-1.07238	0.00496867	0.0175264	Down	--	-
SMESG000019251.1	-0.832812	0.00571506	0.0198587	Down	--	TRY62164.1 hypothetical protein TCAL_04191 [Tigriopus californicus]
SMESG000019281.1	-1.22415	1.95684e-19	4.40829e-18	Down	TRAF3	XP_003387035.1 PREDICTED: TNF receptor-associated factor 3-like [Amphimedon queenslandica]
SMESG000019342.1	0.896908	2.48047e-91	4.44306e-89	Up	bhmt	PAA71237.1 hypothetical protein BOX15_Mlig024130g1 [Macrostomum lignano]
SMESG000019984.1	-0.813932	1.54531e-66	1.57622e-64	Down	--	-
SMESG000020012.1	-0.801512	0.00375654	0.0138044	Down	--	AHD24730.1 X1.C4.1 [Schmidtea mediterranea]
SMESG000020470.1	-1.24041	1.8439e-72	2.16665e-70	Down	Cyp2j6	QCQ73702.1 P450 2B-like protein [Dugesia japonica]
SMESG000020517.1	-1.65613	9.89284e-25	3.00841e-23	Down	--	-
SMESG000020554.1	-1.96789	2.82063e-32	1.21494e-30	Down	--	AKN21633.1 slc31a-3 [Schmidtea mediterranea]
SMESG000020709.1	1.62601	2.13511e-56	1.70437e-54	Up	Trpc2	PAA54089.1 hypothetical protein BOX15_Mlig025367g1 [Macrostomum lignano]
SMESG000020864.1	-1.42435	7.78594e-11	9.57788e-10	Down	--	XP_005929372.1 PREDICTED: lipopolysaccharide-induced tumor necrosis factor-alpha factor homolog isoform X2 [Haplochromis burtoni]
SMESG000020883.1	0.883499	6.72986e-08	5.91551e-07	Up	--	-
SMESG000020904.1	-2.06231	4.35092e-14	7.09903e-13	Down	SLC25A10	AKN21587.1 slc25a-19 [Schmidtea mediterranea]
SMESG000020909.1	-2.01009	1.87018e-10	2.20992e-09	Down	Slc25a10	AKN21587.1 slc25a-19 [Schmidtea mediterranea]
SMESG000020952.1	-1.05839	1.07684e-44	6.59024e-43	Down	--	VDQ11758.1 unnamed protein product [Trichobilharzia regenti]
SMESG000020955.1	-1.88698	1.38998e-125	3.92617e-123	Down	--	VDQ11758.1 unnamed protein product [Trichobilharzia regenti]
SMESG000021388.1	-0.852758	1.37484e-29	5.19117e-28	Down	--	-
SMESG000021419.1	-1.07673	2.37398e-38	1.21495e-36	Down	Mogat2	XP_011426483.1 PREDICTED: 2-acylglycerol O-acyltransferase 2-A [Crassostrea gigas]
SMESG000021434.1	0.875085	0.00256646	0.00986812	Up	FOXI1	XP_023241034.1 forkhead box protein C2-like [Centruroides sculpturatus]
SMESG000021439.1	-1.70362	5.38053e-30	2.06883e-28	Down	--	-
SMESG000021912.1	-2.50099	1.43077e-257	1.40101e-254	Down	--	XP_015351526.1 PREDICTED: COX assembly mitochondrial protein 2 homolog isoform X1 [Marmota marmota marmota]
SMESG000022030.1	-0.884931	5.56748e-45	3.46505e-43	Down	Ephx4	XP_013388618.1 epoxide hydrolase 4 [Lingula anatina]
SMESG000022049.1	-1.93608	4.48592e-133	1.4019e-130	Down	--	-
SMESG000022100.1	-0.950231	0.00394966	0.0143667	Down	CYP2B11	AWM96409.1 cytochrome P450 2K1-like protein [Dugesia japonica]
SMESG000022139.1	-1.34529	2.40337e-93	4.46844e-91	Down	--	-
SMESG000022278.1	-1.30497	9.15338e-35	4.29536e-33	Down	Trhde	AFJ24858.1 hypothetical protein, partial [Schmidtea mediterranea]
SMESG000022279.1	-1.35437	2.81262e-29	1.04852e-27	Down	ANPEP	AFJ24858.1 hypothetical protein, partial [Schmidtea mediterranea]
SMESG000022330.1	-1.36387	0.00065038	0.002908	Down	Os09g0362500	AFJ24858.1 hypothetical protein, partial [Schmidtea mediterranea]
SMESG000022742.1	2.85148	5.19956e-57	4.26655e-55	Up	--	-
SMESG000022750.1	-2.10492	1.35629e-98	2.76684e-96	Down	--	ANP44407.1 epidermal growth factor Smed-egf-2 [Schmidtea mediterranea]
SMESG000022751.1	-1.1297	9.68856e-22	2.48352e-20	Down	CYP2U1	QCQ73702.1 P450 2B-like protein [Dugesia japonica]
SMESG000022757.1	-0.86856	0.000810997	0.003541	Down	BEST1	GAA48003.1 bestrophin-2 [Clonorchis sinensis]
SMESG000022808.1	0.826361	5.59761e-10	6.26659e-09	Up	SLC8B1	AKN21565.1 slc24a-5 [Schmidtea mediterranea]
SMESG000022809.1	-1.27742	5.92924e-52	4.42074e-50	Down	SLC8B1	AKN21565.1 slc24a-5 [Schmidtea mediterranea]
SMESG000022839.1	-1.9569	2.28888e-162	1.01876e-159	Down	--	-
SMESG000022856.1	-0.871214	3.45808e-17	7.0445e-16	Down	lhx1a	XP_022803726.1 LOW QUALITY PROTEIN: LIM/homeobox protein Lhx1-like [Stylophora pistillata]
SMESG000022857.1	-0.866297	1.5919e-50	1.13504e-48	Down	Sgk3	XP_029649968.1 serine/threonine-protein kinase Sgk1-like isoform X4 [Octopus vulgaris]
SMESG000022898.1	-1.30419	2.82735e-31	1.15356e-29	Down	Slc36a2	AKN21654.1 slc36a-1 [Schmidtea mediterranea]
SMESG000022911.1	1.39284	3.30126e-10	3.78229e-09	Up	F_48D10.1	ANO39033.1 GCR060 [Schmidtea mediterranea]
SMESG000022912.1	-2.10736	3.47721e-15	6.10924e-14	Down	--	-
SMESG000023002.1	1.0629	0.00227675	0.00889149	Up	--	RXG73896.1 Myosin-M heavy chain [Armadillidium vulgare]
SMESG000023131.1	-1.20548	0.000186498	0.000938783	Down	--	PAA51774.1 hypothetical protein BOX15_Mlig028140g3 [Macrostomum lignano]
SMESG000023205.1	-0.889779	1.27483e-60	1.16302e-58	Down	Cyt-b5	ABF67509.1 cytochrome b5 [Haliotis discus discus]
SMESG000023221.1	-0.910228	4.64443e-08	4.15706e-07	Down	--	-
SMESG000023234.1	1.15621	7.80445e-21	1.91372e-19	Up	--	-
SMESG000023324.1	-0.980139	6.79758e-13	1.00851e-11	Down	--	AKN21493.1 slc15a-7, partial [Schmidtea mediterranea]
SMESG000023353.1	1.25905	7.68176e-84	1.1283e-81	Up	AGAP008842	BAR87948.1 aquaporin [Dugesia japonica]
SMESG000023427.1	1.39608	1.34063e-16	2.59437e-15	Up	--	-
SMESG000023528.1	-1.93293	1.24821e-44	7.5759e-43	Down	CYP2U1	PAA79583.1 hypothetical protein BOX15_Mlig006662g3 [Macrostomum lignano]
SMESG000023530.1	-1.433	2.52197e-22	6.66236e-21	Down	CYP2C30	PAA79583.1 hypothetical protein BOX15_Mlig006662g3 [Macrostomum lignano]
SMESG000023649.1	-0.846562	8.93906e-85	1.35358e-82	Down	--	-
SMESG000023842.1	-1.07194	1.3473e-87	2.30107e-85	Down	--	PAA53120.1 hypothetical protein BOX15_Mlig018526g3 [Macrostomum lignano]
SMESG000024118.1	-2.12468	1.95496e-94	3.68135e-92	Down	Fuca2	XP_033100644.1 alpha-L-fucosidase-like [Anneissia japonica]
SMESG000024141.1	-1.48394	4.11286e-23	1.14196e-21	Down	--	-
SMESG000024294.1	1.10062	0.000285486	0.00137528	Up	--	-
SMESG000024379.1	0.874194	9.77448e-05	0.00052055	Up	Grm3	ANO39069.1 GCR106 [Schmidtea mediterranea]
SMESG000024476.1	1.45565	5.09951e-15	8.87459e-14	Up	--	-
SMESG000024525.1	-0.865399	3.12335e-25	9.86577e-24	Down	Slc13a5	AKN21480.1 slc13a-1 [Schmidtea mediterranea]
SMESG000024526.1	-0.853426	4.93808e-16	9.21607e-15	Down	Slc13a5	AKN21480.1 slc13a-1 [Schmidtea mediterranea]
SMESG000024592.1	-1.47641	1.25771e-28	4.59532e-27	Down	--	AYA22141.1 TNF receptor-associated factor 3 [Mytilus coruscus]
SMESG000024635.1	0.929915	0.0104539	0.0332785	Up	SMPDL3A	XP_024345759.1 hypothetical protein EGR_10576 [Echinococcus granulosus]
SMESG000024663.1	1.46581	3.35153e-70	3.7013e-68	Up	--	XP_032782336.1 uncharacterized protein LOC116920275 [Daphnia magna]
SMESG000024669.1	-0.977249	2.34678e-13	3.60559e-12	Down	--	XP_028517423.1 uncharacterized protein LOC114575902 [Exaiptasia pallida]
SMESG000024739.1	-1.45487	2.81322e-122	7.51284e-120	Down	Acsl5	XP_013086264.1 PREDICTED: long-chain-fatty-acid--CoA ligase 1-like isoform X2 [Biomphalaria glabrata]
SMESG000024833.1	-2.23273	2.54093e-123	6.91133e-121	Down	INHBA	AGX01005.1 activin 1 [Schmidtea mediterranea]
SMESG000025346.1	1.01296	7.80799e-05	0.000424126	Up	--	-
SMESG000025410.1	-2.25487	7.51489e-85	1.16188e-82	Down	--	-
SMESG000025656.1	0.86606	0.000131036	0.000678653	Up	hoxa1a	AQT19791.1 hypothetical protein Smed-Hox3b [Schmidtea mediterranea]
SMESG000025870.1	-0.808194	1.05872e-40	5.84603e-39	Down	SLC2A4RG	CRL08173.1 CLUMA_CG021018, isoform A [Clunio marinus]
SMESG000025889.1	-1.41774	5.74216e-152	2.27948e-149	Down	--	-
SMESG000026036.1	-0.951494	7.92453e-10	8.75154e-09	Down	SNZERR	ELU04699.1 hypothetical protein CAPTEDRAFT_222963 [Capitella teleta]
SMESG000026228.1	1.27229	0.000138424	0.000714648	Up	--	PAA87551.1 hypothetical protein BOX15_Mlig020950g1 [Macrostomum lignano]
SMESG000026385.1	0.852494	0.0206898	0.0594476	Up	TWIST2	ADC32288.1 twist [Schmidtea polychroa]
SMESG000026398.1	-1.00597	0.000239838	0.00117857	Down	--	-
SMESG000026514.1	-1.17381	9.56025e-116	2.38002e-113	Down	pps	PAA89199.1 hypothetical protein BOX15_Mlig003482g1 [Macrostomum lignano]
SMESG000026714.1	1.18001	2.69557e-08	2.50104e-07	Up	--	-
SMESG000026848.1	-1.01937	1.1094e-48	7.54391e-47	Down	--	-
SMESG000027123.1	0.889737	2.77221e-40	1.50808e-38	Up	Traf2	ADF47429.1 TNF receptor-associated factor-2-like protein A [Dugesia japonica]
SMESG000027140.1	-1.01813	1.27149e-121	3.27642e-119	Down	--	-
SMESG000027225.1	-2.04551	3.91111e-30	1.51175e-28	Down	TF	AFJ24848.1 transferrin-1 [Schmidtea mediterranea]
SMESG000027347.1	0.823379	0.00318666	0.0119239	Up	--	-
SMESG000027385.1	0.862933	6.93408e-05	0.000380597	Up	PCBP4	THD22716.1 Poly(rC)-binding protein 2 [Fasciola hepatica]
SMESG000027389.1	-1.31697	1.30802e-57	1.0916e-55	Down	CLN5	XP_009059770.1 hypothetical protein LOTGIDRAFT_125348 [Lottia gigantea]
SMESG000027404.1	-1.50507	4.91924e-21	1.2236e-19	Down	--	-
SMESG000027530.1	0.816977	4.13219e-06	2.78539e-05	Up	SPEC3	XP_021341520.1 uncharacterized protein LOC110442313 [Mizuhopecten yessoensis]
SMESG000027903.1	-1.45777	4.45233e-30	1.71643e-28	Down	slc39a1	AKN21668.1 slc39a-3 [Schmidtea mediterranea]
SMESG000027907.1	-0.817745	9.12132e-39	4.71739e-37	Down	Plb1	PAA84188.1 hypothetical protein BOX15_Mlig030000g3 [Macrostomum lignano]
SMESG000027913.1	0.892668	0.0275897	0.0750302	Up	MDH1	ETN62258.1 malate dehydrogenase [Anopheles darlingi]
SMESG000027979.1	-1.28775	1.15642e-113	2.83091e-111	Down	--	AFJ24740.1 hypothetical protein [Schmidtea mediterranea]
SMESG000028186.1	-1.16263	9.72125e-76	1.28636e-73	Down	--	-
SMESG000028190.1	1.15529	0.00235713	0.00914943	Up	--	-
SMESG000028261.1	0.956838	3.8042e-11	4.81276e-10	Up	--	ADW66116.1 lectin-like protein, partial [Schmidtea mediterranea]
SMESG000028420.1	-1.60557	3.36986e-135	1.09992e-132	Down	--	-
SMESG000028475.1	-1.26847	4.13744e-101	8.68152e-99	Down	SLCO1B3	AKN21547.1 slc21a-2 [Schmidtea mediterranea]
SMESG000028980.1	-0.817965	9.93181e-15	1.69233e-13	Down	SLC47A1	AKN21704.1 slc47a-7 [Schmidtea mediterranea]
SMESG000029046.1	-1.26162	3.75807e-75	4.84198e-73	Down	TMEM144	XP_026696612.1 transmembrane protein 144 isoform X1 [Ciona intestinalis]
SMESG000029089.1	-2.37798	5.8714e-60	5.25849e-58	Down	--	-
SMESG000029095.1	-0.967507	1.28736e-05	8.01558e-05	Down	--	-
SMESG000029096.1	-1.53866	4.06113e-151	1.56974e-148	Down	--	AFJ24856.1 retinoblastoma binding protein-1 [Schmidtea mediterranea]
SMESG000029138.1	-0.976383	0.000590195	0.00265751	Down	TMT1	XP_022096077.1 putative methyltransferase DDB_G0268948 isoform X3 [Acanthaster planci]
SMESG000029150.1	-0.804252	0.00501136	0.01766	Down	--	XP_002679460.1 predicted protein [Naegleria gruberi strain NEG-M] [Naegleria gruberi]
SMESG000029269.1	-1.89537	2.29909e-10	2.68008e-09	Down	slc20a1b	AKN21545.1 slc20a-2 [Schmidtea mediterranea]
SMESG000029574.1	2.66942	4.11773e-59	3.60008e-57	Up	--	-
SMESG000029581.1	2.28169	1.50317e-69	1.63544e-67	Up	--	-
SMESG000029589.1	-0.906611	0.000623591	0.00279759	Down	--	-
SMESG000029594.1	-1.1447	4.01566e-38	2.04798e-36	Down	--	-
SMESG000029602.1	-1.40284	2.18613e-05	0.000131275	Down	--	AFJ24802.1 hypothetical protein, partial [Schmidtea mediterranea]
SMESG000029612.1	-1.82138	1.04569e-194	6.67789e-192	Down	--	KAF2348572.1 Integrase catalytic core [Trinorchestia longiramus]
SMESG000029906.1	-2.04039	1.52409e-67	1.59899e-65	Down	--	PAA57824.1 hypothetical protein BOX15_Mlig031394g1, partial [Macrostomum lignano]
SMESG000030115.1	-2.0907	3.37981e-83	4.91511e-81	Down	SLC24A5	AKN21568.1 slc24a-8 [Schmidtea mediterranea]
SMESG000030689.1	-0.985713	1.1991e-13	1.88167e-12	Down	--	-
SMESG000030759.1	0.923121	0.000544981	0.00247517	Up	pou4f3	VDO91242.1 unnamed protein product [Schistosoma margrebowiei]
SMESG000030921.1	0.830318	1.91656e-14	3.20254e-13	Up	--	-
SMESG000030981.1	-2.08085	6.73281e-200	4.49507e-197	Down	--	AEN71564.1 ferritin 3 [Argopecten irradians]
SMESG000031046.1	-0.929004	2.18754e-14	3.63468e-13	Down	--	XP_007906270.1 PREDICTED: stimulated by retinoic acid gene 6 protein homolog [Callorhinchus milii]
SMESG000031125.1	-1.41183	4.9739e-76	6.64151e-74	Down	MJ1319	AKN21444.1 slc6a-24 [Schmidtea mediterranea]
SMESG000031561.1	-0.851657	4.54891e-08	4.08004e-07	Down	nAChRbeta1	PAA52239.1 hypothetical protein BOX15_Mlig019166g1 [Macrostomum lignano]
SMESG000031800.1	0.863981	8.50448e-11	1.04161e-09	Up	--	XP_029982425.1 NPC intracellular cholesterol transporter 2 [Sphaeramia orbicularis]
SMESG000031874.1	0.990192	1.72599e-36	8.39447e-35	Up	PTPRB	KPM09442.1 tyrosine-protein phosphatase 10D-like protein [Sarcoptes scabiei]
SMESG000031930.1	1.56546	6.67131e-91	1.16653e-88	Up	mib1	XP_007070246.1 LOW QUALITY PROTEIN: E3 ubiquitin-protein ligase MIB2 [Chelonia mydas]
SMESG000031949.1	-1.18857	4.20766e-13	6.34519e-12	Down	--	-
SMESG000032396.1	-2.20549	2.52645e-229	1.95308e-226	Down	UROC1	RWS03308.1 urocanate hydratase-like isoform X1 [Dinothrombium tinctorium]
SMESG000032414.1	-2.92023	8.59978e-58	7.30137e-56	Down	--	-
SMESG000032456.1	0.806663	1.6046e-13	2.49138e-12	Up	--	-
SMESG000032525.1	-1.16932	1.97935e-22	5.27634e-21	Down	--	-
SMESG000032703.1	-1.17481	1.18099e-27	4.18993e-26	Down	DDB_G0284251	AKN21681.1 slc42a-1 [Schmidtea mediterranea]
SMESG000033033.1	-1.22035	3.25511e-40	1.76425e-38	Down	--	TNN18903.1 Lipopolysaccharide-induced tumor necrosis factor-alpha factor isoform 1 [Schistosoma japonicum]
SMESG000033099.1	-1.69025	4.19949e-15	7.35187e-14	Down	DTX16	AKN21703.1 slc47a-6 [Schmidtea mediterranea]
SMESG000033381.1	0.859541	0.0248009	0.0687055	Up	PKD2	AKN21728.1 PKD2-2 [Schmidtea mediterranea]
SMESG000033386.1	-0.979558	2.96263e-15	5.24279e-14	Down	--	-
SMESG000033518.1	-1.66355	7.68038e-34	3.43931e-32	Down	Trhde	AFJ24858.1 hypothetical protein, partial [Schmidtea mediterranea]
SMESG000033615.1	-0.973489	4.6413e-12	6.38907e-11	Down	--	RMX35982.1 hypothetical protein pdam_00005184 [Pocillopora damicornis]
SMESG000033682.1	1.03795	0.0113198	0.0356486	Up	--	-
SMESG000033958.1	-3.70433	2.03983e-269	2.49675e-266	Down	--	XP_029185063.1 hercynylcysteine sulfoxide lyase-like [Acropora millepora]
SMESG000034030.1	-0.892744	5.93267e-87	1.0016e-84	Down	DPYD	XP_022315388.1 dihydropyrimidine dehydrogenase [NADP(+)]-like [Crassostrea virginica]
SMESG000034294.1	1.48046	1.94472e-18	4.17604e-17	Up	Cp1	VDL99111.1 unnamed protein product [Schistocephalus solidus]
SMESG000034497.1	0.976141	8.40563e-18	1.7612e-16	Up	RCN1	KAA0194773.1 Calumenin-B [Fasciolopsis buski]
SMESG000034791.1	-0.886695	1.25512e-52	9.45399e-51	Down	FAAH	OCT82705.1 hypothetical protein XELAEV_18025235mg [Xenopus laevis]
SMESG000034829.1	-1.99121	1.83933e-170	9.31591e-168	Down	--	-
SMESG000034870.1	-0.826949	8.70095e-05	0.000469334	Down	--	-
SMESG000035035.1	-1.71503	1.07715e-07	9.1664e-07	Down	--	QFQ66892.1 hypothetical protein [Schmidtea mediterranea]
SMESG000035037.1	-1.12442	5.0241e-07	3.89941e-06	Down	--	QFQ66892.1 hypothetical protein [Schmidtea mediterranea]
SMESG000035040.1	-1.45091	2.20588e-34	1.01567e-32	Down	--	QFQ66892.1 hypothetical protein [Schmidtea mediterranea]
SMESG000035181.1	-1.44085	3.70036e-80	5.12744e-78	Down	IDH1	XP_013407452.1 isocitrate dehydrogenase [NADP] cytoplasmic [Lingula anatina]
SMESG000035238.1	-0.912461	1.20685e-22	3.24655e-21	Down	--	-
SMESG000035335.1	-1.12037	5.17435e-08	4.60333e-07	Down	--	-
SMESG000035381.1	0.869839	7.43822e-33	3.23232e-31	Up	DUSP10	BAK52368.1 mitogen-activated protein kinase phosphatase [Dugesia japonica]
SMESG000035473.1	0.997391	0.000180355	0.000911581	Up	--	-
SMESG000035804.1	-0.89046	2.61802e-25	8.32326e-24	Down	tubb4	XP_001192875.1 tubulin beta chain [Strongylocentrotus purpuratus]
SMESG000035904.1	1.24987	1.03859e-20	2.5049e-19	Up	--	AFJ24813.1 GRB2 associated binding protein-1 [Schmidtea mediterranea]
SMESG000035953.1	-0.994907	2.42408e-27	8.47734e-26	Down	Slc26a6	AKN21605.1 slc26a-1 [Schmidtea mediterranea]
SMESG000036036.1	-2.24972	0	0	Down	--	KAA0191751.1 Gynecophoral canal protein [Fasciolopsis buski]
SMESG000036037.1	-2.26233	2.80263e-306	4.5739e-303	Down	--	VDK87667.1 unnamed protein product [Dibothriocephalus latus]
SMESG000036201.1	1.00486	0.00201861	0.00797668	Up	NFX1	RUS75090.1 hypothetical protein EGW08_017144 [Elysia chlorotica]
SMESG000036223.1	1.29839	7.33081e-13	1.08325e-11	Up	--	-
SMESG000036408.1	-1.14647	4.13881e-60	3.7295e-58	Down	--	-
SMESG000036533.1	-1.02753	6.6213e-84	9.8236e-82	Down	DBI	XP_021948487.1 acyl-CoA-binding protein-like [Folsomia candida]
SMESG000036695.1	-0.822447	0.036365	0.0941583	Down	Zrsr2	THD22061.1 U2 small nuclear ribonucleoprotein auxiliary [Fasciola hepatica]
SMESG000036895.1	-0.953471	1.61224e-35	7.6885e-34	Down	RIDA	XP_002710629.2 PREDICTED: ribonuclease UK114 [Oryctolagus cuniculus]
SMESG000036932.1	-1.90428	4.48169e-74	5.62625e-72	Down	--	-
SMESG000037031.1	-0.966274	0.00117046	0.00491192	Down	gata4	AFF18488.1 GATA456 [Schmidtea mediterranea]
SMESG000037362.1	-1.30577	2.43466e-29	9.09929e-28	Down	pm20d2	XP_014771841.1 PREDICTED: peptidase M20 domain-containing protein 2-like [Octopus bimaculoides]
SMESG000037418.1	-2.64364	1.12454e-304	1.65173e-301	Down	--	-
SMESG000037449.1	-0.821794	1.21211e-07	1.02555e-06	Down	--	XP_002429601.1 ganglioside induced differentiation associated protein, putative [Pediculus humanus corporis]
SMESG000037481.1	0.984445	9.92128e-26	3.21686e-24	Up	ak2	XP_005099746.1 PREDICTED: adenylate kinase-like [Aplysia californica]
SMESG000037532.1	-1.57655	2.50406e-27	8.73625e-26	Down	SAT2	XP_031555174.1 diamine acetyltransferase 2-like [Actinia tenebrosa]
SMESG000037556.1	0.812799	1.75641e-22	4.70769e-21	Up	LMO1	XP_022254616.1 LIM domain only protein 3-like isoform X1 [Limulus polyphemus]
SMESG000037573.1	-1.01685	7.64562e-19	1.66616e-17	Down	--	-
SMESG000037658.1	-0.956446	9.02579e-15	1.54692e-13	Down	--	-
SMESG000037727.1	0.902956	0.00941449	0.0305034	Up	--	XP_005500163.1 synaptotagmin-15 isoform X2 [Columba livia]
SMESG000037749.1	-0.984137	4.09022e-50	2.88832e-48	Down	--	-
SMESG000037770.1	0.812983	0.00136153	0.0056118	Up	GTF2IRD2	ANO39054.1 GCR087 [Schmidtea mediterranea]
SMESG000037977.1	-1.53179	2.02024e-22	5.36587e-21	Down	apolpp	PAA80758.1 hypothetical protein BOX15_Mlig027085g4 [Macrostomum lignano]
SMESG000037978.1	-1.19878	1.67888e-48	1.13638e-46	Down	apolpp	AYP74774.1 apolipophorin 2A [Sepioteuthis lessoniana]
SMESG000037990.1	-1.42607	1.31177e-07	1.10477e-06	Down	imt1	XP_013420829.1 mannosyl phosphorylinositol ceramide synthase CSH1-like [Lingula anatina]
SMESG000037996.1	0.9736	0.000611772	0.00274708	Up	G2	AFJ24821.1 tissue factor pathway inhibitor-1 [Schmidtea mediterranea]
SMESG000038000.1	1.20813	9.9794e-07	7.41413e-06	Up	Ppn	XP_023226201.1 papilin-like [Centruroides sculpturatus]
SMESG000038295.1	0.924608	0.00064361	0.00287948	Up	--	-
SMESG000038510.1	0.9019	0.0231353	0.0650856	Up	--	-
SMESG000038673.1	-2.0809	2.56632e-48	1.70562e-46	Down	--	-
SMESG000038687.1	-2.14115	3.19573e-79	4.34619e-77	Down	--	-
SMESG000038746.1	-1.06203	2.80143e-23	7.85257e-22	Down	Mgll	XP_029974387.1 monoglyceride lipase isoform X1 [Salarias fasciatus]
SMESG000038950.1	0.841943	0.0262327	0.0720467	Up	ERF1	VDM33803.1 unnamed protein product [Hydatigera taeniaeformis]
SMESG000039062.1	-0.95052	2.14017e-40	1.16858e-38	Down	--	XP_020908007.1 TNF receptor-associated factor 6 [Exaiptasia pallida]
SMESG000039213.1	1.73711	4.11032e-07	3.2406e-06	Up	--	VDP95956.1 unnamed protein product [Echinostoma caproni]
SMESG000039339.1	1.0139	2.95341e-06	2.05689e-05	Up	Trpv6	XP_022322068.1 transient receptor potential cation channel subfamily V member 5-like isoform X10 [Crassostrea virginica]
SMESG000039672.1	-0.83292	0.0024503	0.00947574	Down	--	XP_009062964.1 hypothetical protein LOTGIDRAFT_235459 [Lottia gigantea]
SMESG000039696.1	-0.803088	2.8118e-31	1.15041e-29	Down	Coprox	THD24889.1 Oxygen-dependent coproporphyrinogen-III oxidase [Fasciola hepatica]
SMESG000039746.1	-0.831375	1.3477e-58	1.16441e-56	Down	fax	PAA48108.1 hypothetical protein BOX15_Mlig003243g1 [Macrostomum lignano]
SMESG000039911.1	-1.42533	6.98004e-128	2.0923e-125	Down	ABCC1	PAA88602.1 hypothetical protein BOX15_Mlig016190g1 [Macrostomum lignano]
SMESG000039950.1	-0.83264	1.45994e-28	5.32098e-27	Down	Tep1	RDD37418.1 Telomerase protein component 1 [Trichoplax sp. H2]
SMESG000039981.1	-1.58433	7.6641e-26	2.49602e-24	Down	Usp16	XP_023716130.1 ubiquitin carboxyl-terminal hydrolase 30 homolog isoform X1 [Cryptotermes secundus]
SMESG000040010.1	-1.44748	1.25194e-86	2.06612e-84	Down	--	-
SMESG000040015.1	-1.35683	8.64893e-56	6.82986e-54	Down	--	-
SMESG000040021.1	-1.07424	1.57903e-14	2.64758e-13	Down	--	-
SMESG000040081.1	-0.958557	4.68589e-09	4.74664e-08	Down	--	XP_030374490.1 pancreas transcription factor 1 subunit alpha [Scaptodrosophila lebanonensis]
SMESG000040206.1	-1.78977	1.24898e-91	2.26482e-89	Down	--	-
SMESG000040241.1	-1.00126	3.15304e-06	2.18452e-05	Down	--	-
SMESG000040291.1	-2.40371	1.39846e-110	3.36731e-108	Down	--	-
SMESG000040849.1	-4.0026	2.91948e-130	8.93362e-128	Down	slc52a3a	XP_023691021.1 solute carrier family 52, riboflavin transporter, member 3 [Paramormyrops kingsleyae]
SMESG000040908.1	-0.996152	3.1282e-19	6.97223e-18	Down	--	-
SMESG000040922.1	-1.73068	1.04171e-19	2.37588e-18	Down	--	-
SMESG000040959.1	-1.6326	2.73686e-53	2.08285e-51	Down	--	-
SMESG000041021.1	-0.917408	0.00797859	0.0266219	Down	--	VDL94235.1 unnamed protein product [Schistocephalus solidus]
SMESG000041022.1	-1.70184	2.16223e-29	8.12246e-28	Down	--	-
SMESG000041220.1	-1.02391	4.17433e-07	3.28753e-06	Down	--	-
SMESG000041329.1	-2.29204	1.36517e-38	7.03565e-37	Down	--	-
SMESG000041335.1	-1.42627	1.14207e-40	6.28266e-39	Down	Slc13a1	AKN21484.1 slc13a-5 [Schmidtea mediterranea]
SMESG000041422.1	-1.09915	2.1512e-15	3.83923e-14	Down	--	-
SMESG000041464.1	1.33264	0.000257533	0.00125628	Up	--	-
SMESG000041533.1	-0.875519	0.023778	0.0663723	Down	--	XP_016308463.1 PREDICTED: synaptotagmin-1-like [Sinocyclocheilus anshuiensis]
SMESG000041863.1	-0.851268	0.0184547	0.0542343	Down	Slc8a2	AKN21458.1 slc8a-4 [Schmidtea mediterranea]
SMESG000042050.1	-0.976219	0.00154164	0.00628291	Down	--	-
SMESG000042095.1	0.807406	8.85349e-05	0.000476861	Up	seb-2	XP_014781135.1 PREDICTED: calcitonin gene-related peptide type 1 receptor-like [Octopus bimaculoides]
SMESG000042103.1	-0.82811	3.2364e-25	1.02009e-23	Down	frrs1	CDS37614.1 ferric chelate reductase [Echinococcus multilocularis]
SMESG000042109.1	0.902423	1.36505e-05	8.48132e-05	Up	--	THD20653.1 hypothetical protein D915_008391 [Fasciola hepatica]
SMESG000042199.1	1.05427	1.56041e-07	1.30076e-06	Up	--	-
SMESG000042369.1	-1.21602	1.05886e-07	9.04217e-07	Down	--	-
SMESG000042605.1	-0.809161	1.45445e-20	3.47932e-19	Down	Rab10	TKR96449.1 hypothetical protein L596_010464 [Steinernema carpocapsae]
SMESG000042630.1	0.807904	2.64447e-10	3.05162e-09	Up	GFI1B	ELT97045.1 hypothetical protein CAPTEDRAFT_45287, partial [Capitella teleta]
SMESG000042765.1	-1.1921	3.84287e-76	5.17835e-74	Down	--	-
SMESG000042787.1	-0.963555	4.86059e-65	4.72797e-63	Down	--	-
SMESG000042952.1	-1.16774	2.92799e-08	2.7014e-07	Down	--	-
SMESG000043142.1	-1.19765	5.37538e-42	3.07212e-40	Down	gatm	VDL99016.1 unnamed protein product [Schistocephalus solidus]
SMESG000043173.1	-0.827584	1.37249e-41	7.7238e-40	Down	Agmo	PAA70495.1 hypothetical protein BOX15_Mlig009958g1 [Macrostomum lignano]
SMESG000043196.1	0.964409	1.44835e-05	8.96856e-05	Up	--	TPP60737.1 G/T mismatch-specific thymine DNA glycosylase [Fasciola gigantica]
SMESG000043277.1	-1.64893	1.38493e-85	2.21106e-83	Down	--	-
SMESG000043278.1	-1.59037	5.18719e-25	1.59392e-23	Down	--	-
SMESG000043310.1	-1.13743	1.38912e-07	1.16591e-06	Down	--	-
SMESG000043321.1	-1.36991	3.63378e-21	9.11331e-20	Down	--	AHD24730.1 X1.C4.1 [Schmidtea mediterranea]
SMESG000043373.1	1.31632	2.24975e-13	3.46377e-12	Up	--	AHD24730.1 X1.C4.1 [Schmidtea mediterranea]
SMESG000043420.1	1.32744	6.42904e-18	1.35093e-16	Up	--	-
SMESG000043445.1	-1.55333	0.0132631	0.0409004	Down	--	-
SMESG000043528.1	-0.951257	2.28436e-33	1.00457e-31	Down	SULT1C4	THD23764.1 Aryl sulfotransferase [Fasciola hepatica]
SMESG000043630.1	-0.914014	1.32948e-86	2.16971e-84	Down	ACSS3	PAA53974.1 hypothetical protein BOX15_Mlig003121g5, partial [Macrostomum lignano]
SMESG000043645.1	0.887564	3.2433e-10	3.71878e-09	Up	Acss3	XP_028410532.1 acyl-CoA synthetase short-chain family member 3, mitochondrial-like isoform X1 [Dendronephthya gigantea]
SMESG000043653.1	-1.27086	4.89703e-23	1.35202e-21	Down	acsA	XP_028410533.1 acyl-CoA synthetase short-chain family member 3, mitochondrial-like isoform X2 [Dendronephthya gigantea]
SMESG000043655.1	-1.33282	4.76417e-17	9.58577e-16	Down	Acss3	XP_020659649.1 acyl-CoA synthetase short-chain family member 3, mitochondrial-like isoform X1 [Pogona vitticeps]
SMESG000043866.1	-0.869796	8.29935e-10	9.11749e-09	Down	--	AHD24730.1 X1.C4.1 [Schmidtea mediterranea]
SMESG000044281.1	-1.19359	3.21296e-18	6.84934e-17	Down	--	XP_015260507.1 PREDICTED: glycine N-acyltransferase-like protein 3 [Cyprinodon variegatus]
SMESG000044431.1	-1.17209	8.34303e-27	2.84321e-25	Down	yrbE	RWS27664.1 inositol 2-dehydrogenase-like protein [Leptotrombidium deliense]
SMESG000044524.1	-1.30096	0.000194386	0.000973787	Down	--	XP_012218223.1 PREDICTED: uncharacterized protein LOC105669702 [Linepithema humile]
SMESG000044557.1	-1.10001	1.20303e-30	4.75004e-29	Down	RAB27B	XP_022369506.1 ras-related protein Rab-27B [Enhydra lutris kenyoni]
SMESG000044680.1	0.818191	1.11037e-06	8.18733e-06	Up	MPEG1	RMX43816.1 hypothetical protein pdam_00017055 [Pocillopora damicornis]
SMESG000044907.1	-0.947165	4.5112e-12	6.22749e-11	Down	TUBB4B	XP_030842712.1 tubulin beta-4B chain isoform X3 [Strongylocentrotus purpuratus]
SMESG000045007.1	-1.75078	1.02674e-64	9.92155e-63	Down	--	-
SMESG000045072.1	-0.970747	4.44727e-28	1.60102e-26	Down	MAN2B1	XP_021363354.1 lysosomal alpha-mannosidase-like [Mizuhopecten yessoensis]
SMESG000045085.1	-0.908658	9.25662e-12	1.24279e-10	Down	MAN2B1	XP_011454672.1 PREDICTED: lysosomal alpha-mannosidase [Crassostrea gigas]
SMESG000045181.1	-0.942251	0.0128427	0.0397289	Down	--	XP_022086007.1 two pore calcium channel protein 1-like [Acanthaster planci]
SMESG000045248.1	-1.29543	0.000262199	0.00127522	Down	--	-
SMESG000045267.1	-1.43738	0.000110248	0.000580612	Down	CSH1	XP_023932950.1 inositol phosphoceramide mannosyltransferase 2-like [Lingula anatina]
SMESG000045477.1	-0.870991	4.88473e-49	3.33707e-47	Down	ELOVL4	XP_013076488.1 PREDICTED: elongation of very long chain fatty acids protein 4-like [Biomphalaria glabrata]
SMESG000045551.1	-0.922468	2.37247e-27	8.31666e-26	Down	SLC47A2	AKN21703.1 slc47a-6 [Schmidtea mediterranea]
SMESG000045553.1	-1.68448	1.46726e-09	1.57307e-08	Down	SLC47A2	AKN21703.1 slc47a-6 [Schmidtea mediterranea]
SMESG000045597.1	-1.08683	8.91906e-09	8.72192e-08	Down	--	XP_018094971.1 PREDICTED: microsomal triglyceride transfer protein large subunit [Xenopus laevis]
SMESG000045673.1	-0.977215	5.02081e-50	3.49506e-48	Down	--	-
SMESG000046033.1	-0.831192	9.00449e-24	2.57813e-22	Down	abhd12	ROJ78935.1 Monoacylglycerol lipase ABHD12, partial [Anabarilius grahami]
SMESG000046412.1	-0.917118	6.34635e-05	0.000350565	Down	--	-
SMESG000046694.1	-0.927196	5.03211e-05	0.000282861	Down	--	-
SMESG000046823.1	-0.845416	0.00190014	0.00757785	Down	--	-
SMESG000047160.1	0.897464	5.11082e-27	1.75803e-25	Up	PLXNB2	AJA72715.1 plexin B-5, partial [Schmidtea mediterranea]
SMESG000047163.1	0.997942	0.00189344	0.00755936	Up	--	-
SMESG000047560.1	0.986633	7.99302e-08	6.95919e-07	Up	--	-
SMESG000047829.1	-3.89791	1.46806e-193	8.98452e-191	Down	Sbno1	RWS02043.1 Protein strawberry notch-like protein [Dinothrombium tinctorium]
SMESG000048075.1	-1.111	9.59719e-26	3.11866e-24	Down	Phgdh	XP_009048467.1 hypothetical protein LOTGIDRAFT_200644 [Lottia gigantea]
SMESG000048275.1	-0.867421	4.21887e-28	1.52252e-26	Down	Fh	XP_017054623.1 PREDICTED: fumarate hydratase, mitochondrial [Drosophila ficusphila]
SMESG000048287.1	-1.63159	5.72929e-85	8.95231e-83	Down	--	-
SMESG000048502.1	-0.83055	5.92761e-07	4.56075e-06	Down	--	GBN03458.1 Phospholipase A2 [Araneus ventricosus]
SMESG000049222.1	0.84005	5.10941e-08	4.5483e-07	Up	--	-
SMESG000049421.1	-1.227	9.80136e-05	0.000521603	Down	Dhps	XP_013393091.1 deoxyhypusine synthase [Lingula anatina]
SMESG000049462.1	-1.1786	5.13122e-20	1.19252e-18	Down	Slc17a5	AKN21532.1 slc17a-9 [Schmidtea mediterranea]
SMESG000049466.1	-2.24374	1.0365e-236	8.95536e-234	Down	--	XP_031553749.1 DENN domain-containing protein 3-like isoform X2 [Actinia tenebrosa]
SMESG000049582.1	2.87908	6.14386e-23	1.68675e-21	Up	--	QFQ66916.1 trig-1 protein [Schmidtea mediterranea]
SMESG000049723.1	-1.15681	1.84829e-125	5.1222e-123	Down	LCP2	AWM96389.1 cathepsin L2 [Dugesia japonica]
SMESG000049783.1	-0.894006	1.17889e-29	4.48476e-28	Down	CTSL	AWM96389.1 cathepsin L2 [Dugesia japonica]
SMESG000049924.1	-2.36225	1.83865e-268	1.92901e-265	Down	--	GAA52233.1 hypothetical protein CLF_107652 [Clonorchis sinensis]
SMESG000050121.1	-1.00378	4.42807e-05	0.000251118	Down	--	-
SMESG000050216.1	-2.05442	2.15915e-234	1.76186e-231	Down	--	ALJ10579.1 placenta specific protein 8 [Dugesia japonica]
SMESG000050288.1	-0.871366	5.79797e-41	3.22578e-39	Down	Cryl1	XP_014279515.1 lambda-crystallin homolog [Halyomorpha halys]
SMESG000050398.1	1.01999	6.07713e-05	0.00033658	Up	--	TGZ60116.1 hypothetical protein CRM22_008735 [Opisthorchis felineus]
SMESG000050434.1	-1.09194	8.11776e-57	6.5513e-55	Down	CYP71B22	XP_002737962.1 PREDICTED: cytochrome P450 1A1-like [Saccoglossus kowalevskii]
SMESG000050486.1	-1.92853	2.44508e-74	3.09598e-72	Down	--	-
SMESG000050640.1	0.948585	7.6908e-06	4.98951e-05	Up	--	-
SMESG000050805.1	0.873038	1.96351e-05	0.00011883	Up	--	XP_012557682.1 PREDICTED: SCO-spondin-like [Hydra vulgaris]
SMESG000050959.1	-0.804478	1.93427e-59	1.70123e-57	Down	Slc13a5	AKN21482.1 slc13a-3 [Schmidtea mediterranea]
SMESG000051012.1	1.79822	1.97649e-97	3.92306e-95	Up	--	-
SMESG000051013.1	0.853443	9.3127e-13	1.36648e-11	Up	--	-
SMESG000051354.1	-1.38206	1.69945e-127	4.99231e-125	Down	Pka-R2	XP_017066510.1 PREDICTED: cAMP-dependent protein kinase type II regulatory subunit isoform X1 [Drosophila eugracilis]
SMESG000051516.1	-0.994131	5.77147e-71	6.57142e-69	Down	mboat2	ABW97518.1 porcupine-like protein, partial [Schmidtea mediterranea]
SMESG000051626.1	0.882609	2.56849e-22	6.77306e-21	Up	--	ELU00686.1 hypothetical protein CAPTEDRAFT_125662 [Capitella teleta]
SMESG000051787.1	-1.38724	3.87115e-05	0.000221934	Down	Gcnt1	XP_025102018.1 beta-1,3-galactosyl-O-glycosyl-glycoprotein beta-1,6-N-acetylglucosaminyltransferase-like isoform X1 [Pomacea canaliculata]
SMESG000051898.1	-2.42092	9.59169e-23	2.59452e-21	Down	--	-
SMESG000051911.1	0.853398	3.48138e-30	1.3492e-28	Up	--	-
SMESG000051913.1	1.57661	1.4971e-55	1.1759e-53	Up	--	AHD24748.1 X1.B.F11.1 [Schmidtea mediterranea]
SMESG000051914.1	2.09128	2.34111e-102	4.98351e-100	Up	--	-
SMESG000051917.1	1.76251	2.3849e-12	3.3747e-11	Up	--	AFJ24817.1 hypothetical protein, partial [Schmidtea mediterranea]
SMESG000051918.1	1.71246	4.2225e-31	1.69918e-29	Up	--	-
SMESG000051921.1	1.74968	1.31396e-67	1.38845e-65	Up	--	AHD24748.1 X1.B.F11.1 [Schmidtea mediterranea]
SMESG000051953.1	-1.47685	1.55179e-257	1.42454e-254	Down	GATM	AQT19752.1 hypothetical protein Smed-agat-1 [Schmidtea mediterranea]
SMESG000051964.1	-1.48538	2.22818e-176	1.21213e-173	Down	GATM	AQT19752.1 hypothetical protein Smed-agat-1 [Schmidtea mediterranea]
SMESG000051986.1	-1.1442	4.97496e-31	1.99107e-29	Down	SLC26A5	AKN21611.1 slc26a-7 [Schmidtea mediterranea]
SMESG000052008.1	-1.16547	8.6699e-21	2.11183e-19	Down	SLC26A5	AKN21611.1 slc26a-7 [Schmidtea mediterranea]
SMESG000052204.1	-0.937224	7.44928e-34	3.34602e-32	Down	CYP-1	TGZ63231.1 hypothetical protein CRM22_007025 [Opisthorchis felineus]
SMESG000052481.1	-1.01528	7.87685e-06	5.09895e-05	Down	--	-
SMESG000052602.1	-1.45405	1.21792e-103	2.71042e-101	Down	--	XP_025948139.1 adipocyte plasma membrane-associated protein-like [Dromaius novaehollandiae]
SMESG000052648.1	1.01373	0.000330326	0.00157221	Up	EEF1A1	AQT19757.1 hypothetical protein Smed-ef1a-2 [Schmidtea mediterranea]
SMESG000052676.1	-0.808875	0.00601189	0.0207478	Down	--	-
SMESG000052728.1	0.951207	6.82442e-06	4.45895e-05	Up	--	-
SMESG000052758.1	2.64969	8.53733e-28	3.03623e-26	Up	his-4	AFJ24860.1 histone h2b-2, partial [Schmidtea mediterranea]
SMESG000053011.1	-1.73585	1.65195e-46	1.05495e-44	Down	--	-
SMESG000053020.1	-1.6295	1.68103e-70	1.8993e-68	Down	--	-
SMESG000053119.1	-0.935006	3.05946e-20	7.16703e-19	Down	PRKAG3	RNA01427.1 5 -AMP-activated kinase subunit gamma-2 [Brachionus plicatilis]
SMESG000053131.1	1.93875	7.84237e-11	9.63922e-10	Up	--	-
SMESG000053202.1	-1.24781	1.38843e-120	3.51608e-118	Down	MAT2A	PAA84507.1 hypothetical protein BOX15_Mlig008771g3 [Macrostomum lignano]
SMESG000053281.1	-1.14187	0.000913097	0.00394342	Down	Pde7a	VZI27701.1 unnamed protein product [Sparganum proliferum]
SMESG000053503.1	-1.28101	6.30688e-17	1.25693e-15	Down	--	XP_021003341.1 microsomal triglyceride transfer protein large subunit-like [Parasteatoda tepidariorum]
SMESG000053861.1	-1.18494	1.53326e-69	1.65592e-67	Down	--	-
SMESG000054042.1	1.16516	5.72758e-26	1.88203e-24	Up	stg	ANE21817.2 CDC25-2 protein, partial [Schmidtea mediterranea]
SMESG000054075.1	1.48399	1.02667e-20	2.48021e-19	Up	Cp1	VDL99111.1 unnamed protein product [Schistocephalus solidus]
SMESG000054351.1	3.62215	2.73274e-67	2.82665e-65	Up	H4-I	XP_033116238.1 uncharacterized protein LOC117116331 [Anneissia japonica]
SMESG000054503.1	1.18116	0.00133161	0.00550328	Up	Gyc76C	XP_014672517.1 PREDICTED: receptor-type guanylate cyclase gcy-1-like [Priapulus caudatus]
SMESG000055072.1	-2.55079	3.65123e-47	2.35216e-45	Down	--	-
SMESG000055206.1	0.965738	2.39772e-10	2.7818e-09	Up	--	-
SMESG000055506.1	-1.77383	2.34591e-146	8.40409e-144	Down	CBSDUF6	PAA57531.1 hypothetical protein BOX15_Mlig009042g1 [Macrostomum lignano]
SMESG000055659.1	-1.40131	6.76928e-35	3.18677e-33	Down	Chdh	XP_021265032.1 choline dehydrogenase, mitochondrial [Numida meleagris]
SMESG000055733.1	-0.969543	6.12213e-90	1.0579e-87	Down	unc-7	BAE78815.1 innexin7 [Dugesia japonica]
SMESG000055742.1	-0.811749	1.49874e-09	1.60331e-08	Down	--	ANO39078.1 GCR117 [Schmidtea mediterranea]
SMESG000055774.1	0.869108	1.64101e-25	5.26016e-24	Up	IARS2	XP_018645275.1 isoleucine--tRNA ligase [Schistosoma mansoni]
SMESG000055793.1	-0.829185	3.69131e-17	7.49902e-16	Down	--	XP_025080094.1 uncharacterized protein LOC112555793 isoform X1 [Pomacea canaliculata]
SMESG000055797.1	1.68374	2.6997e-47	1.74683e-45	Up	PI16	AFJ24739.1 GLI pathogenesis related-1, partial [Schmidtea mediterranea]
SMESG000055801.1	-0.891413	5.29931e-25	1.62497e-23	Down	iphP	PVD33085.1 hypothetical protein C0Q70_08534 [Pomacea canaliculata]
SMESG000055918.1	0.801852	0.00691506	0.0235058	Up	kh	XP_022328908.1 kynurenine 3-monooxygenase-like [Crassostrea virginica]
SMESG000055996.1	-0.907547	9.71986e-20	2.22376e-18	Down	LRRC58	XP_021353497.1 leucine-rich repeat-containing protein 58-like [Mizuhopecten yessoensis]
SMESG000056235.1	-1.35486	5.6385e-91	9.9781e-89	Down	--	-
SMESG000056325.1	-0.853913	0.00228189	0.00890919	Down	SLC2A13	AKN21403.1 slc2a-9, partial [Schmidtea mediterranea]
SMESG000056326.1	-1.0438	2.03358e-06	1.45633e-05	Down	SLC2A13	AKN21403.1 slc2a-9, partial [Schmidtea mediterranea]
SMESG000056331.1	-0.835876	1.61125e-15	2.91095e-14	Down	Slc2a13	AKN21403.1 slc2a-9, partial [Schmidtea mediterranea]
SMESG000056375.1	-1.09141	5.62473e-23	1.55002e-21	Down	--	-
SMESG000056430.1	-1.08365	1.42147e-142	4.97107e-140	Down	unc-9	AAF75840.1 putative gap junction protein pannexin [Girardia tigrina]
SMESG000056490.1	-0.975805	2.37473e-10	2.76169e-09	Down	CDC42	XP_014669503.1 PREDICTED: ras-related C3 botulinum toxin substrate 1-like isoform X1 [Priapulus caudatus]
SMESG000056509.1	-1.30843	8.09602e-85	1.23869e-82	Down	Pde4d	XP_029716999.1 LOW QUALITY PROTEIN: cAMP-specific 3',5'-cyclic phosphodiesterase-like [Aedes albopictus]
SMESG000056882.1	-1.05372	2.79342e-08	2.58699e-07	Down	--	-
SMESG000056953.1	-1.47223	6.21089e-87	1.03665e-84	Down	AGPAT3	XP_005111448.1 PREDICTED: 1-acyl-sn-glycerol-3-phosphate acyltransferase delta-like [Aplysia californica]
SMESG000057252.1	-4.44724	0	0	Down	ABCC1	PAA88602.1 hypothetical protein BOX15_Mlig016190g1 [Macrostomum lignano]
SMESG000057487.1	-1.13128	3.02005e-05	0.000176727	Down	--	KAF1333933.1 biotin-protein ligase [Schistosoma haematobium]
SMESG000057502.1	1.11878	6.72295e-14	1.07745e-12	Up	--	-
SMESG000057600.1	1.39537	0.000149743	0.000768495	Up	TAGLN3	CDS42346.1 calponin [Echinococcus multilocularis]
SMESG000057719.1	1.38869	3.08897e-05	0.000180413	Up	--	XP_031569060.1 uveal autoantigen with coiled-coil domains and ankyrin repeats-like [Actinia tenebrosa]
SMESG000057720.1	0.852575	2.16252e-11	2.77407e-10	Up	--	-
SMESG000057816.1	-1.01172	4.46304e-156	1.87295e-153	Down	--	THD27201.1 DM9 domain-containing protein [Fasciola hepatica]
SMESG000057913.1	0.897047	0.0346255	0.090398	Up	ACT1	XP_014350129.1 PREDICTED: actin, cytoplasmic type 5 isoform X1 [Latimeria chalumnae]
SMESG000057972.1	-1.01313	2.38316e-26	7.95543e-25	Down	RAB9B	AWL25032.1 Rab9A protein [Dugesia japonica]
SMESG000058003.1	1.01374	0.00376803	0.0138328	Up	ACT1	KAA3676143.1 actin beta/gamma 1 [Paragonimus westermani]
SMESG000058074.1	-1.36482	2.01467e-60	1.82663e-58	Down	PDX2	XP_022792117.1 probable pyridoxal 5'-phosphate synthase subunit PDX2 [Stylophora pistillata]
SMESG000058134.1	-1.146	2.90316e-62	2.69884e-60	Down	Atp7a	XP_013080887.1 PREDICTED: copper-transporting ATPase 1-like isoform X2 [Biomphalaria glabrata]
SMESG000058218.1	-1.13886	3.74785e-49	2.57235e-47	Down	amdhd1	XP_006273053.1 PREDICTED: probable imidazolonepropionase [Alligator mississippiensis]
SMESG000058274.1	-1.46428	1.29341e-14	2.18113e-13	Down	--	-
SMESG000058321.1	-1.44255	2.15117e-25	6.85389e-24	Down	--	AHD24729.1 X1.C3.3 [Schmidtea mediterranea]
SMESG000058546.1	1.78583	1.70949e-22	4.59031e-21	Up	--	-
SMESG000058547.1	-1.78715	1.75437e-08	1.66461e-07	Down	--	-
SMESG000058576.1	1.26553	7.63085e-06	4.95281e-05	Up	PR1B1	THD26831.1 Golgi-associated plant pathogenesis protein 1 [Fasciola hepatica]
SMESG000058665.1	1.4294	1.17059e-08	1.13191e-07	Up	Ddc	BAF73418.1 aromatic amino acid decarboxylase [Dugesia japonica]
SMESG000058721.1	-1.06192	0.000719852	0.00318086	Down	--	-
SMESG000058838.1	-1.11323	8.42104e-51	6.06315e-49	Down	TPCN2	CAX82465.1 Two-pore calcium channel protein 2 (Voltage-dependent calcium channel protein TPC2) [Schistosoma japonicum]
SMESG000058947.1	-1.72184	8.77736e-98	1.76605e-95	Down	Grm3	XP_013409714.1 metabotropic glutamate receptor 2-like [Lingula anatina]
SMESG000058949.1	2.32884	2.40916e-33	1.05629e-31	Up	--	-
SMESG000058973.1	1.19581	6.33154e-07	4.84615e-06	Up	--	-
SMESG000059487.1	1.04767	8.28443e-10	9.11223e-09	Up	pkd2	AKN21729.1 PKD2-3 [Schmidtea mediterranea]
SMESG000059813.1	1.18629	1.33881e-06	9.7784e-06	Up	--	-
SMESG000060313.1	1.45365	5.4624e-27	1.87457e-25	Up	--	AWV63262.1 pks-1 [Schmidtea mediterranea]
SMESG000060675.1	-2.14331	7.42655e-107	1.73145e-104	Down	w	PAA52991.1 hypothetical protein BOX15_Mlig012313g4 [Macrostomum lignano]
SMESG000060680.1	-2.17185	3.0366e-103	6.65695e-101	Down	CYP3A24	XP_022343234.1 cytochrome P450 3A24-like [Crassostrea virginica]
SMESG000060689.1	-0.948369	1.02722e-72	1.22666e-70	Down	CYP3A12	XP_011429711.1 PREDICTED: cytochrome P450 3A24 [Crassostrea gigas]
SMESG000060698.1	-1.95152	2.79616e-24	8.28023e-23	Down	--	AKN21500.1 slc16a-5, partial [Schmidtea mediterranea]
SMESG000060777.1	-1.74257	2.32925e-102	4.98351e-100	Down	SPE1	XP_014767555.1 PREDICTED: ornithine decarboxylase-like isoform X1 [Octopus bimaculoides]
SMESG000060981.1	-2.82946	7.07209e-34	3.18635e-32	Down	SLC10A3	AKN21468.1 slc10a-1 [Schmidtea mediterranea]
SMESG000061103.1	1.3321	3.00359e-25	9.50792e-24	Up	DYNLRB2	XP_032827019.1 dynein light chain roadblock-type 1 [Petromyzon marinus]
SMESG000061340.1	-1.23154	6.07585e-61	5.57763e-59	Down	SPBC1861.05	XP_023300757.1 pseudouridine-metabolizing bifunctional protein C1861.05 [Lucilia cuprina]
SMESG000061390.1	-0.906325	4.59232e-31	1.84295e-29	Down	--	AKN21505.1 slc16a-10 [Schmidtea mediterranea]
SMESG000061393.1	-1.113	1.33557e-24	4.01163e-23	Down	--	AKN21505.1 slc16a-10 [Schmidtea mediterranea]
SMESG000061502.1	0.82196	9.50188e-14	1.5088e-12	Up	--	-
SMESG000061762.1	-1.42094	6.70564e-05	0.000369162	Down	--	-
SMESG000061767.1	-1.49386	6.6281e-100	1.37118e-97	Down	--	-
SMESG000061797.1	-1.51113	1.11259e-25	3.59951e-24	Down	--	-
SMESG000061853.1	-0.823336	2.41804e-06	1.70997e-05	Down	--	-
SMESG000061948.1	1.5328	4.66899e-05	0.000264067	Up	--	-
SMESG000061955.1	-1.7241	3.47459e-134	1.10945e-131	Down	Aldh8a1	XP_022088838.1 aldehyde dehydrogenase family 8 member A1-like [Acanthaster planci]
SMESG000062465.1	-1.12073	5.6473e-13	8.4382e-12	Down	--	AKN21500.1 slc16a-5, partial [Schmidtea mediterranea]
SMESG000062468.1	-1.48609	5.94425e-26	1.94886e-24	Down	oxlT	AKN21500.1 slc16a-5, partial [Schmidtea mediterranea]
SMESG000062686.1	-2.01985	1.50896e-08	1.44106e-07	Down	--	-
SMESG000062750.1	-1.52645	1.064e-62	9.9542e-61	Down	--	-
SMESG000062945.1	-2.08243	1.93106e-13	2.98562e-12	Down	--	-
SMESG000062986.1	1.04893	1.14426e-07	9.71498e-07	Up	--	-
SMESG000063332.1	-0.847588	9.25725e-42	5.24983e-40	Down	omt6	CAX69635.1 putative catechol-O-methyltransferase domain containing 1 [Schistosoma japonicum]
SMESG000063471.1	2.62463	5.41476e-86	8.73978e-84	Up	Cp1	PAV61346.1 hypothetical protein WR25_18197 [Diploscapter pachys]
SMESG000063517.1	2.61896	2.14595e-44	1.29711e-42	Up	Cp1	PAA54736.1 hypothetical protein BOX15_Mlig002369g2 [Macrostomum lignano]
SMESG000063593.1	-1.48489	7.90372e-92	1.45112e-89	Down	Dock2	XP_021925129.1 dedicator of cytokinesis protein 3 isoform X2 [Zootermopsis nevadensis]
SMESG000063595.1	-1.37302	4.1762e-70	4.57761e-68	Down	Dock3	XP_029190429.1 uncharacterized protein LOC114957238 [Acropora millepora]
SMESG000063826.1	-1.31433	1.84134e-48	1.23496e-46	Down	--	RXN10576.1 glycine N-acyltransferase 3 [Labeo rohita]
SMESG000064024.1	2.1531	3.83865e-31	1.55752e-29	Up	--	-
SMESG000064120.1	0.800257	4.44188e-05	0.000251707	Up	alkJ	XP_012164921.1 neither inactivation nor afterpotential protein G [Bombus terrestris]
SMESG000064358.1	-0.853499	4.59439e-58	3.92339e-56	Down	Dync1h1	TNN11253.1 Cytoplasmic dynein 1 heavy chain 1 isoform 1 [Schistosoma japonicum]
SMESG000064458.1	-1.78111	2.04601e-67	2.13133e-65	Down	--	-
SMESG000064571.1	1.00542	0.00121582	0.00507617	Up	Slc26a6	AKN21608.1 slc26a-4 [Schmidtea mediterranea]
SMESG000064601.1	1.08437	3.31485e-05	0.000192826	Up	--	AHD24734.1 1.E7.3 [Schmidtea mediterranea]
SMESG000064660.1	-1.49683	3.60671e-08	3.29244e-07	Down	OsI_16936	BAU19443.1 serine racemase [Dugesia japonica]
SMESG000064664.1	-1.67298	3.7879e-08	3.44073e-07	Down	SR	BAU19443.1 serine racemase [Dugesia japonica]
SMESG000064829.1	-1.11944	1.86557e-18	4.01194e-17	Down	SLC10A2	AKN21470.1 slc10a-3 [Schmidtea mediterranea]
SMESG000064881.1	-0.952518	1.38182e-33	6.13176e-32	Down	Lgsn	KAA0195568.1 Glutamine synthetase [Fasciolopsis buski]
SMESG000065078.1	-1.48332	1.04673e-73	1.30292e-71	Down	--	AKN21694.1 slc46a-2 [Schmidtea mediterranea]
SMESG000065348.1	-1.46164	8.86093e-39	4.59892e-37	Down	--	-
SMESG000065349.1	-1.31739	2.19557e-41	1.23086e-39	Down	--	-
SMESG000065350.1	-1.39353	4.57232e-08	4.09502e-07	Down	--	-
SMESG000065355.1	-1.3443	1.41862e-72	1.68037e-70	Down	--	-
SMESG000065550.1	-1.06899	7.85357e-10	8.6797e-09	Down	CIB2	XP_021343724.1 calcium and integrin-binding protein 1-like [Mizuhopecten yessoensis]
SMESG000065551.1	-1.24368	1.11942e-12	1.6344e-11	Down	CIB2	GBM51171.1 Calcium and integrin-binding family member 2 [Araneus ventricosus]
SMESG000065836.1	0.962877	6.85411e-12	9.31297e-11	Up	--	-
SMESG000065921.1	-0.86369	4.10975e-45	2.57966e-43	Down	unc-7	PAA52887.1 hypothetical protein BOX15_Mlig006041g2 [Macrostomum lignano]
SMESG000065938.1	-1.87841	3.90231e-31	1.57898e-29	Down	--	XP_012942420.1 PREDICTED: uncharacterized protein LOC101845869 [Aplysia californica]
SMESG000066332.1	-1.2798	1.99565e-13	3.08224e-12	Down	--	-
SMESG000066365.1	-1.04719	6.29474e-11	7.79571e-10	Down	--	-
SMESG000066384.1	0.841721	1.59863e-24	4.7822e-23	Up	--	AFD29622.1 ZFP-1 [Schmidtea mediterranea]
SMESG000066563.1	-2.97494	2.84829e-279	3.80324e-276	Down	daao-1	BAN78701.1 D-amino acid oxidase [Dugesia ryukyuensis]
SMESG000066596.1	2.15469	2.46943e-51	1.81355e-49	Up	--	-
SMESG000066719.1	-0.932512	2.69048e-06	1.88899e-05	Down	ETHE1	XP_014288724.1 persulfide dioxygenase ETHE1, mitochondrial [Halyomorpha halys]
SMESG000066912.1	-0.874896	0.00369404	0.0136053	Down	NAT7	AKN21561.1 slc23a-2 [Schmidtea mediterranea]
SMESG000066923.1	-0.800401	2.84716e-05	0.000167948	Down	Slc23a2	AKN21561.1 slc23a-2 [Schmidtea mediterranea]
SMESG000066997.1	1.97591	4.29132e-18	9.12169e-17	Up	--	ARM37835.1 synaptotagmin XV-like protein [Schmidtea mediterranea]
SMESG000067109.1	-1.78301	3.46686e-10	3.95966e-09	Down	--	KAE9534571.1 hypothetical protein AGLY_008661, partial [Aphis glycines]
SMESG000067788.1	1.15741	2.23558e-20	5.29617e-19	Up	--	-
SMESG000067850.1	0.812783	0.00637329	0.0218615	Up	--	-
SMESG000067906.1	1.80402	5.3235e-57	4.34398e-55	Up	his-48	AFJ24860.1 histone h2b-2, partial [Schmidtea mediterranea]
SMESG000067932.1	0.833247	5.9648e-15	1.03559e-13	Up	H2AC21	XP_018096298.1 PREDICTED: histone H2A type 1-like [Xenopus laevis]
SMESG000067946.1	0.858972	5.57695e-09	5.61056e-08	Up	--	-
SMESG000067986.1	-1.3464	3.09977e-174	1.62605e-171	Down	Enpep	XP_009563298.1 PREDICTED: glutamyl aminopeptidase [Cuculus canorus]
SMESG000067998.1	0.912213	0.0345833	0.090336	Up	--	-
SMESG000068090.1	-1.46327	3.57515e-57	2.96677e-55	Down	RDX	XP_011453118.1 PREDICTED: radixin isoform X3 [Crassostrea gigas]
SMESG000068121.1	-1.04661	6.2253e-15	1.07827e-13	Down	ASNS	XP_031566811.1 asparagine synthetase [glutamine-hydrolyzing]-like [Actinia tenebrosa]
SMESG000068162.1	-1.12764	1.23587e-49	8.56246e-48	Down	PRKACB	XP_023266811.1 cAMP-dependent protein kinase catalytic subunit beta-like isoform X1 [Seriola lalandi dorsalis]
SMESG000068192.1	-2.0409	0	0	Down	CHD5	ADE34162.1 chromodomain helicase DNA-binding protein 4 [Schmidtea mediterranea]
SMESG000068193.1	-1.35919	4.78813e-08	4.28046e-07	Down	--	XP_031571408.1 TNF receptor-associated factor 5-like [Actinia tenebrosa]
SMESG000068198.1	-0.884164	0.0249266	0.0689756	Down	--	-
SMESG000068402.1	-0.867706	3.90908e-50	2.77375e-48	Down	Gatm	VDP77876.1 unnamed protein product [Echinostoma caproni]
SMESG000068458.1	-0.836893	9.18604e-21	2.23385e-19	Down	ada	THD26775.1 Adenosine deaminase [Fasciola hepatica]
SMESG000068461.1	-0.827198	9.9113e-18	2.06786e-16	Down	ada	XP_022083748.1 adenosine deaminase-like isoform X1 [Acanthaster planci]
SMESG000068583.1	0.950884	0.000211417	0.00105122	Up	--	-
SMESG000068620.1	-1.23097	4.35473e-14	7.09903e-13	Down	Stk33	XP_029812828.1 serine/threonine-protein kinase 33 isoform X1 [Suricata suricatta]
SMESG000068743.1	-1.12675	3.92917e-22	1.02873e-20	Down	--	AIX99543.1 pmp-10, partial [Schmidtea mediterranea]
SMESG000068874.1	-1.43826	1.80768e-14	3.02751e-13	Down	ELOVL	XP_011445953.1 PREDICTED: elongation of very long chain fatty acids protein 7 [Crassostrea gigas]
SMESG000068877.1	-1.96643	8.89257e-43	5.16261e-41	Down	ELOVL	XP_011445953.1 PREDICTED: elongation of very long chain fatty acids protein 7 [Crassostrea gigas]
SMESG000068886.1	0.918496	0.0100887	0.0323544	Up	--	-
SMESG000068909.1	-1.51804	1.94671e-106	4.4677e-104	Down	--	PAA57444.1 hypothetical protein BOX15_Mlig023060g3 [Macrostomum lignano]
SMESG000068925.1	1.10361	9.4753e-21	2.30038e-19	Up	--	-
SMESG000069149.1	-2.62523	7.0512e-23	1.93224e-21	Down	--	-
SMESG000069399.1	-1.53358	5.21457e-26	1.71966e-24	Down	VPS21	CDW71257.1 gtp binding protein [Stylonychia lemnae]
SMESG000069533.1	0.96931	0.000747231	0.00329392	Up	GRIK5	PAA91976.1 hypothetical protein BOX15_Mlig017883g1, partial [Macrostomum lignano]
SMESG000069640.1	-1.31869	7.85233e-32	3.32378e-30	Down	--	AJA72716.1 semaphorin 1, partial [Schmidtea mediterranea]
SMESG000069669.1	-1.59589	1.18165e-29	4.48476e-28	Down	--	AKN21505.1 slc16a-10 [Schmidtea mediterranea]
SMESG000069681.1	-0.970877	1.89614e-24	5.66066e-23	Down	--	AKN21505.1 slc16a-10 [Schmidtea mediterranea]
SMESG000069796.1	-1.87349	5.35954e-45	3.34983e-43	Down	--	-
SMESG000069832.1	-1.805	3.21297e-31	1.30726e-29	Down	--	-
SMESG000069905.1	-2.47843	6.57028e-223	4.82521e-220	Down	SLC39A1	AKN21678.1 slc39a-13 [Schmidtea mediterranea]
SMESG000070267.1	-0.942747	2.56011e-48	1.70562e-46	Down	--	AFJ24792.1 TNF receptor associated factor-2, partial [Schmidtea mediterranea]
SMESG000070308.1	-1.0466	3.49636e-08	3.19568e-07	Down	--	XP_011431277.1 PREDICTED: cell wall protein PRY3 isoform X4 [Crassostrea gigas]
SMESG000070472.1	-1.31682	9.98571e-73	1.21215e-70	Down	Tcaf3	XP_020894935.1 TRPM8 channel-associated factor homolog [Exaiptasia pallida]
SMESG000070485.1	1.16461	0.00277951	0.0105738	Up	--	-
SMESG000070491.1	-2.39261	1.01358e-72	1.22028e-70	Down	--	XP_019630926.1 PREDICTED: Williams-Beuren syndrome chromosomal region 27 protein-like [Branchiostoma belcheri]
SMESG000070508.1	-0.907857	0.0209356	0.0600238	Down	--	-
SMESG000070778.1	1.66157	6.38429e-15	1.10451e-13	Up	htr1aa	ANO38993.1 GCR011 [Schmidtea mediterranea]
SMESG000070985.1	-2.82403	2.27318e-158	9.82013e-156	Down	POSTN	THD27333.1 Gynecophoral canal protein [Fasciola hepatica]
SMESG000071232.1	-0.968435	3.28966e-06	2.27061e-05	Down	--	PAA78931.1 hypothetical protein BOX15_Mlig015448g3 [Macrostomum lignano]
SMESG000071344.1	-0.82257	1.81804e-66	1.81656e-64	Down	--	-
SMESG000071424.1	-0.839425	0.00375866	0.0138087	Down	NIT2	XP_030762381.1 omega-amidase NIT2 [Sitophilus oryzae]
SMESG000071518.1	-1.23282	7.80256e-45	4.79515e-43	Down	--	-
SMESG000071612.1	0.830529	0.0340497	0.0892254	Up	--	-
SMESG000071877.1	1.00041	0.0100481	0.0322382	Up	kctd15l	XP_022902067.1 BTB/POZ domain-containing protein kctd15, partial [Onthophagus taurus]
SMESG000071974.1	-2.25165	6.68383e-10	7.45422e-09	Down	--	-
SMESG000072026.1	-2.0969	5.1776e-13	7.76799e-12	Down	--	-
SMESG000072407.1	-0.879465	4.42008e-13	6.64506e-12	Down	dhdh	XP_006563740.2 trans-1,2-dihydrobenzene-1,2-diol dehydrogenase [Apis mellifera]
SMESG000072428.1	-1.04037	1.77181e-11	2.31533e-10	Down	--	-
SMESG000072549.1	-1.16691	1.11149e-05	6.98571e-05	Down	--	-
SMESG000072722.1	-1.5665	1.47071e-15	2.66688e-14	Down	CYP2F3	QCQ73702.1 P450 2B-like protein [Dugesia japonica]
SMESG000072744.1	-1.30698	5.88184e-44	3.51189e-42	Down	CYP2U1	QCQ73702.1 P450 2B-like protein [Dugesia japonica]
SMESG000072914.1	-1.1951	1.01484e-39	5.42034e-38	Down	ABHD17A	THD21030.1 Protein ABHD17C [Fasciola hepatica]
SMESG000073126.1	-0.804644	0.000101662	0.000539068	Down	--	-
SMESG000073407.1	1.51889	4.24145e-32	1.81628e-30	Up	DNAH10	VDD74852.1 unnamed protein product [Mesocestoides corti]
SMESG000073414.1	1.56365	3.99093e-15	6.99507e-14	Up	DNAH10	VZI19223.1 unnamed protein product [Sparganum proliferum]
SMESG000073421.1	1.18899	1.68819e-07	1.39697e-06	Up	DNAH10	XP_025092039.1 LOW QUALITY PROTEIN: dynein heavy chain 10, axonemal-like [Pomacea canaliculata]
SMESG000073430.1	0.823819	3.77558e-05	0.000217048	Up	DNAH10	THD27356.1 Dynein heavy chain [Fasciola hepatica]
SMESG000073664.1	0.958144	7.13244e-06	4.63956e-05	Up	-	-
SMESG000073666.1	-2.31231	0	0	Down	VWF	XP_022332232.1 apolipophorins-like [Crassostrea virginica]
SMESG000074007.1	1.73596	1.21344e-18	2.62875e-17	Up	Rap1	XP_011662785.1 GTP-binding protein Di-Ras2-like [Strongylocentrotus purpuratus]
SMESG000074058.1	-1.19316	0.00417574	0.0151142	Down	--	-
SMESG000074066.1	-1.03248	8.48378e-16	1.56153e-14	Down	vdr	TGZ65983.1 hypothetical protein CRM22_005579 [Opisthorchis felineus]
SMESG000074073.1	1.22506	2.91998e-05	0.000171349	Up	d215	ANO39054.1 GCR087 [Schmidtea mediterranea]
SMESG000074185.1	0.963591	7.03001e-60	6.22029e-58	Up	LIPF	XP_002163647.2 PREDICTED: gastric triacylglycerol lipase-like [Hydra vulgaris]
SMESG000074226.1	-0.820166	3.67741e-07	2.91494e-06	Down	Abcc1	XP_022323795.1 multidrug resistance-associated protein 1-like isoform X2 [Crassostrea virginica]
SMESG000074479.1	5.36198	1.26462e-121	3.27642e-119	Up	H3-I	XP_018646598.1 histone H3, putative [Schistosoma mansoni]
SMESG000074486.1	-1.08759	3.69689e-13	5.60371e-12	Down	loxl2a	PAA77785.1 hypothetical protein BOX15_Mlig025085g1 [Macrostomum lignano]
SMESG000074503.1	0.840387	1.62831e-06	1.17932e-05	Up	--	PAA53931.1 hypothetical protein BOX15_Mlig023664g1 [Macrostomum lignano]
SMESG000074532.1	-1.02337	1.09722e-13	1.73476e-12	Down	Upp2	VDK38180.1 unnamed protein product [Taenia asiatica]
SMESG000074719.1	-1.11847	5.24401e-71	6.0175e-69	Down	--	-
SMESG000074880.1	0.820914	5.21507e-08	4.63674e-07	Up	HVCN1	GAA50253.1 voltage-gated hydrogen channel 1 [Clonorchis sinensis]
SMESG000075160.1	0.87233	0.0158894	0.0477658	Up	--	XP_028368402.1 calcium-dependent phospholipase A2 [Phyllostomus discolor]
SMESG000075530.1	-0.964061	5.29019e-10	5.94509e-09	Down	--	AFJ24792.1 TNF receptor associated factor-2, partial [Schmidtea mediterranea]
SMESG000075896.1	0.887925	0.0284393	0.0770127	Up	--	-
SMESG000075918.1	-0.899544	3.22823e-24	9.54049e-23	Down	CLN3	TNN12998.1 Protein BTN1 [Schistosoma japonicum]
SMESG000075929.1	0.880752	0.00516398	0.0181543	Up	foxf1	XP_014227366.1 forkhead box protein A2-like [Trichogramma pretiosum]
SMESG000075938.1	-1.56601	1.08004e-24	3.26412e-23	Down	--	AKN21558.1 slc22a-10 [Schmidtea mediterranea]
SMESG000076072.1	1.31869	2.01201e-43	1.19163e-41	Up	--	ANO38983.1 orphan chemoreceptor family protein [Schmidtea mediterranea]
SMESG000076123.1	-0.83607	1.75056e-23	4.94467e-22	Down	rgn	XP_011439356.1 PREDICTED: regucalcin [Crassostrea gigas]
SMESG000076142.1	-1.63057	6.76296e-188	3.97338e-185	Down	--	-
SMESG000076328.1	-1.24029	1.36974e-75	1.79632e-73	Down	--	-
SMESG000076464.1	-0.970037	1.52268e-25	4.89391e-24	Down	--	XP_028399817.1 sodium-dependent glucose transporter 1A-like [Dendronephthya gigantea]
SMESG000076502.1	-0.969067	9.42225e-05	0.000504719	Down	NCEH1	KTG45001.1 hypothetical protein cypCar_00018764 [Cyprinus carpio]
SMESG000076513.1	-0.883965	3.86046e-09	3.94589e-08	Down	Nceh1	XP_019358854.1 PREDICTED: neutral cholesterol ester hydrolase 1 [Gavialis gangeticus]
SMESG000076526.1	-0.912162	5.06905e-20	1.17994e-18	Down	TMPRSS15	RTG85020.1 uncharacterized protein DC041_0008529 [Schistosoma bovis]
SMESG000076527.1	-1.3711	0.000331977	0.00157955	Down	--	KXJ19557.1 Retrovirus-related Pol polyprotein from transposon 412 [Exaiptasia pallida]
SMESG000076607.1	-1.64688	3.0962e-109	7.335e-107	Down	SLC8A1	AKN21456.1 slc8a-2 [Schmidtea mediterranea]
SMESG000076823.1	-1.53467	1.14007e-23	3.25151e-22	Down	TMPRSS15	TNN17107.1 Transmembrane protease serine 11C isoform 2 [Schistosoma japonicum]
SMESG000076927.1	-1.40685	2.87828e-46	1.83014e-44	Down	--	-
SMESG000077167.1	0.981987	3.55224e-07	2.82181e-06	Up	HVCN1	CDS41233.1 conserved hypothetical protein [Echinococcus multilocularis]
SMESG000077202.1	-0.803332	7.82553e-67	8.03786e-65	Down	CTSC	XP_005091689.1 PREDICTED: dipeptidyl peptidase 1-like isoform X2 [Aplysia californica]
SMESG000077265.1	-1.02688	5.28613e-33	2.30394e-31	Down	--	-
SMESG000077266.1	-0.896715	3.92507e-28	1.41999e-26	Down	--	-
SMESG000077405.1	-1.48575	7.79792e-64	7.43739e-62	Down	RCN1	AAP05891.1 SJCHGC09235 protein [Schistosoma japonicum]
SMESG000077416.1	-1.2774	4.72162e-51	3.43323e-49	Down	--	PAA93900.1 hypothetical protein BOX15_Mlig034563g1 [Macrostomum lignano]
SMESG000077491.1	-3.46855	4.8446e-106	1.09473e-103	Down	Acmsd	XP_021377118.1 2-amino-3-carboxymuconate-6-semialdehyde decarboxylase-like isoform X1 [Mizuhopecten yessoensis]
SMESG000077659.1	1.32713	4.17833e-09	4.25009e-08	Up	DUR3	XP_009065706.1 hypothetical protein LOTGIDRAFT_169159 [Lottia gigantea]
SMESG000077660.1	-1.09059	1.59063e-42	9.12622e-41	Down	--	ANO39113.1 GCR158 [Schmidtea mediterranea]
SMESG000077667.1	-0.908342	1.28735e-63	1.21209e-61	Down	--	-
SMESG000077672.1	-1.95996	2.0359e-36	9.8691e-35	Down	--	-
SMESG000077674.1	-0.935889	3.76573e-20	8.7935e-19	Down	--	PAA93900.1 hypothetical protein BOX15_Mlig034563g1 [Macrostomum lignano]
SMESG000077726.1	2.571	1.48499e-23	4.20259e-22	Up	--	XP_011441138.1 PREDICTED: sex peptide receptor isoform X2 [Crassostrea gigas]
SMESG000077761.1	-1.30595	4.84792e-12	6.64858e-11	Down	Os07g0555200	PAA94717.1 hypothetical protein BOX15_Mlig013413g3 [Macrostomum lignano]
SMESG000077907.1	-1.22837	1.74341e-10	2.07011e-09	Down	Rab27b	VDP32161.1 unnamed protein product [Schistosoma mattheei]
SMESG000077918.1	-1.52642	2.11015e-39	1.11489e-37	Down	DHRS11	XP_032362503.1 dehydrogenase/reductase SDR family member 11-like [Etheostoma spectabile]
SMESG000077989.1	0.842083	2.23422e-29	8.37147e-28	Up	hsp70	AJN00640.1 HSP70 [Polycelis sp. ZD-2015]
SMESG000078092.1	-1.07793	3.39889e-24	9.98459e-23	Down	CYP2B11	QCQ73702.1 P450 2B-like protein [Dugesia japonica]
SMESG000078094.1	-1.07023	1.75275e-10	2.07951e-09	Down	CYP2B11	QCQ73702.1 P450 2B-like protein [Dugesia japonica]
SMESG000078126.1	-1.966	4.58018e-43	2.69095e-41	Down	aca1	XP_019630010.1 PREDICTED: L-azetidine-2-carboxylic acid acetyltransferase-like [Branchiostoma belcheri]
SMESG000078255.1	-1.35279	1.5674e-20	3.73732e-19	Down	loxl2a	VDP65370.1 unnamed protein product [Echinostoma caproni]
SMESG000078264.1	0.855791	1.38986e-81	1.96292e-79	Up	impdh2	XP_030314190.1 inosine-5'-monophosphate dehydrogenase 2 isoform X2 [Calypte anna]
SMESG000078281.1	-1.5967	5.28075e-136	1.80381e-133	Down	--	-
SMESG000078287.1	-0.885067	4.5029e-19	9.97565e-18	Down	Uprt	XP_015792927.1 uracil phosphoribosyltransferase homolog isoform X2 [Tetranychus urticae]
SMESG000078293.1	1.94227	4.24068e-10	4.8061e-09	Up	--	-
SMESG000078300.1	1.50149	7.72263e-34	3.44772e-32	Up	GLIS3	ACZ64516.1 GLI-3 [Schmidtea mediterranea]
SMESG000078438.1	1.38912	0.000104969	0.000555396	Up	TUBA1B	RJW64916.1 Tubulin alpha chain [Clonorchis sinensis]
SMESG000078505.1	-0.970668	3.22029e-48	2.13062e-46	Down	CDKL3	XP_020650089.1 cyclin-dependent kinase-like 3 isoform X2 [Pogona vitticeps]
SMESG000078507.1	-1.16285	2.63941e-15	4.68775e-14	Down	CLA4	OMJ89093.1 hypothetical protein SteCoe_8815 [Stentor coeruleus]
SMESG000078509.1	-1.08529	3.00181e-09	3.10497e-08	Down	shk2	XP_022820065.1 serine/threonine-protein kinase fused [Spodoptera litura]
SMESG000078545.1	-1.18972	2.48812e-167	1.21818e-164	Down	Cd82	PAA63419.1 hypothetical protein BOX15_Mlig023279g1 [Macrostomum lignano]
SMESG000078588.1	-1.0899	2.46368e-65	2.41244e-63	Down	--	AET43969.1 microsomal GST3, partial [Reishia clavigera]
SMESG000079004.1	-1.89992	1.45376e-268	1.64252e-265	Down	alphaTub84B	XP_015795966.1 tubulin alpha chain [Tetranychus urticae]
SMESG000079158.1	-0.988744	1.86512e-28	6.78089e-27	Down	Tspo2	XP_009062264.1 hypothetical protein LOTGIDRAFT_210696 [Lottia gigantea]
SMESG000079496.1	-0.999813	3.7219e-05	0.000214297	Down	--	-
SMESG000079498.1	-0.961853	1.20734e-35	5.77636e-34	Down	--	-
SMESG000079507.1	-0.959954	0.0181459	0.0534766	Down	--	-
SMESG000079512.1	-1.00958	8.06529e-69	8.64694e-67	Down	DTH-1	Q00400.2 RecName: Full=Homeobox protein DTH-1 [Girardia tigrina]
SMESG000079513.1	-1.03937	1.29792e-24	3.90653e-23	Down	maoA	XP_013070480.1 PREDICTED: probable flavin-containing monoamine oxidase A [Biomphalaria glabrata]
SMESG000079514.1	1.32896	6.61534e-21	1.6303e-19	Up	Gata3	THD22500.1 GATA-binding factor 3 [Fasciola hepatica]
SMESG000079540.1	-2.04008	1.50913e-95	2.87871e-93	Down	SLC47A1	AKN21704.1 slc47a-7 [Schmidtea mediterranea]
SMESG000079712.1	-2.75988	4.11731e-127	1.18578e-124	Down	--	C0HKB8.1 RecName: Full=Acidic phospholipase A2; Short=MdumPLA2; Short=svPLA2; AltName: Full=Phosphatidylcholine 2-acylhydrolase [Micrurus dumerilii]
SMESG000079713.1	-1.05885	8.42265e-43	4.9092e-41	Down	haao	XP_004209226.1 PREDICTED: general transcription factor II-I repeat domain-containing protein 2A-like [Hydra vulgaris]
SMESG000080129.1	-1.1527	1.03236e-148	3.88803e-146	Down	cof1	CAX70876.1 putative Cofilin-1 [Schistosoma japonicum]
SMESG000080367.1	1.02729	0.000681539	0.00302979	Up	--	PAA76062.1 hypothetical protein BOX15_Mlig017883g2, partial [Macrostomum lignano]
SMESG000080530.1	0.950942	3.11987e-08	2.86583e-07	Up	--	-
SMESG000080562.1	-1.44905	1.87686e-68	1.99764e-66	Down	Oca2	XP_013390139.1 P protein-like isoform X1 [Lingula anatina]
SMESG000081110.1	-1.81531	8.5233e-30	3.25169e-28	Down	HSPA1L	ABJ97377.1 heat shock protein 70 [Pteria penguin]
SMESG000081216.1	0.816871	0.00433389	0.0155982	Up	--	RXG59362.1 hypothetical protein Avbf_09278 [Armadillidium vulgare]
SMESG000081422.1	0.941391	3.17193e-05	0.000184805	Up	NPY2R	AKQ63065.1 orphan G-protein coupled receptor 59 [Platynereis dumerilii]
SMESG000081585.1	1.36518	1.08015e-06	7.98053e-06	Up	SLC2A4	AKN21398.1 slc2a-3, partial [Schmidtea mediterranea]
SMESG000081649.1	2.13644	1.2093e-27	4.28006e-26	Up	--	-
SMESG000081746.1	1.20474	2.93979e-09	3.04511e-08	Up	--	THD19475.1 hypothetical protein D915_009859 [Fasciola hepatica]
SMESG000081840.1	1.24927	4.88884e-06	3.25952e-05	Up	--	-

## Sheet: CHD4_12dpi_diff_gene
Transcriptome profiling at 12 dpi after depletion of CHD4
Gene_name	log2FoldChange	pvalue	padj	change	Symbol	Description
SMESG000000077.1	-1.12142	6.41782e-05	0.000337779	Down	slc22a15	CDS37184.1 synaptic vesicle 2 protein [Echinococcus multilocularis]
SMESG000000110.1	-1.09198	6.06961e-05	0.000320749	Down	svopl	OAF72203.1 putative transporter SVOPL [Intoshia linei]
SMESG000000212.1	-1.05371	2.78928e-16	4.99317e-15	Down	Gs2	XP_013778191.1 glutamine synthetase-like [Limulus polyphemus]
SMESG000000219.1	-0.893697	1.67271e-28	6.00374e-27	Down	--	-
SMESG000000228.1	-1.20728	3.61495e-14	5.58464e-13	Down	GLUL	XP_031764979.1 zinc finger MYM-type protein 1-like [Galleria mellonella]
SMESG000000273.1	-1.07402	4.77966e-31	1.9613e-29	Down	ABCC1	PAA84816.1 hypothetical protein BOX15_Mlig012583g1 [Macrostomum lignano]
SMESG000000283.1	-1.37123	3.73608e-44	2.84598e-42	Down	ABCC1	PAA84816.1 hypothetical protein BOX15_Mlig012583g1 [Macrostomum lignano]
SMESG000000381.1	-2.44459	4.08766e-20	9.41147e-19	Down	--	-
SMESG000000502.1	-1.1641	0.00325211	0.0115624	Down	--	TRY63435.1 hypothetical protein TCAL_11406 [Tigriopus californicus]
SMESG000000601.1	-1.62828	3.64086e-26	1.16386e-24	Down	--	XP_011448530.1 PREDICTED: uncharacterized protein LOC105343036 isoform X1 [Crassostrea gigas]
SMESG000000602.1	-1.13894	0.000146488	0.000716971	Down	CIPK19	XP_030829881.1 uncharacterized protein LOC100892171 [Strongylocentrotus purpuratus]
SMESG000000713.1	-1.09245	8.72315e-07	6.24934e-06	Down	unc-9	XP_013415367.1 uncharacterized protein LOC106177207 [Lingula anatina]
SMESG000000802.1	1.03523	1.79829e-08	1.61869e-07	Up	LACTB	AQT19774.1 hypothetical protein Smed-lactB [Schmidtea mediterranea]
SMESG000000812.1	1.30074	5.989e-22	1.56512e-20	Up	--	VDO81743.1 unnamed protein product, partial [Schistosoma margrebowiei]
SMESG000000960.1	0.937432	6.2057e-14	9.4444e-13	Up	--	AEI69697.1 EGR-like protein 1 [Schmidtea mediterranea]
SMESG000000988.1	-0.944841	5.21601e-07	3.85044e-06	Down	SOAT1	XP_021347209.1 sterol O-acyltransferase 1-like [Mizuhopecten yessoensis]
SMESG000001287.1	-1.03325	2.85378e-31	1.19152e-29	Down	Nfat5	PAA82774.1 hypothetical protein BOX15_Mlig002181g3 [Macrostomum lignano]
SMESG000001362.1	-1.18921	3.32906e-09	3.24544e-08	Down	--	XP_006815414.1 PREDICTED: growth factor receptor-bound protein 14-like [Saccoglossus kowalevskii]
SMESG000001565.1	-1.77939	9.40825e-46	7.52712e-44	Down	TRAF3	XP_014346563.1 PREDICTED: TNF receptor-associated factor 3-like isoform X2 [Latimeria chalumnae]
SMESG000001708.1	-1.0147	1.58242e-36	8.48756e-35	Down	ALDH2	TGZ74088.1 hypothetical protein CRM22_001133 [Opisthorchis felineus]
SMESG000001727.1	-2.97831	1.89815e-70	3.12453e-68	Down	--	-
SMESG000001797.1	-1.27453	3.13997e-60	4.05113e-58	Down	--	-
SMESG000002416.1	-2.24022	2.41683e-50	2.21868e-48	Down	--	XP_011261479.1 transmembrane channel-like protein 1 [Camponotus floridanus]
SMESG000002617.1	-0.845781	5.24907e-10	5.59315e-09	Down	ADAMTS10	VDO61024.1 unnamed protein product [Schistosoma curassoni]
SMESG000002628.1	0.888833	1.63715e-32	7.23633e-31	Up	--	XP_029312114.1 progranulin isoform X4 [Cottoperca gobio]
SMESG000002694.1	-1.44036	5.51091e-97	2.07766e-94	Down	HAL	XP_002594930.1 hypothetical protein BRAFLDRAFT_209115 [Branchiostoma floridae]
SMESG000002831.1	2.59997	3.64262e-70	5.79621e-68	Up	TMPRSS3	XP_013390346.1 bone morphogenetic protein 1 [Lingula anatina]
SMESG000002840.1	-1.66924	3.67135e-18	7.40527e-17	Down	LIPF	KAA3682135.1 lysosomal acid lipase/cholesteryl ester hydrolase [Paragonimus westermani]
SMESG000002858.1	2.55207	9.15067e-57	1.06542e-54	Up	--	XP_018645986.1 acid sensing ion channel 4, pituitary, putative [Schistosoma mansoni]
SMESG000002883.1	-1.9358	1.96666e-12	2.65704e-11	Down	--	-
SMESG000002890.1	-2.14624	1.74468e-16	3.17479e-15	Down	--	XP_009064757.1 hypothetical protein LOTGIDRAFT_168623 [Lottia gigantea]
SMESG000002973.1	-1.56997	5.09652e-41	3.37904e-39	Down	Marf	XP_021004036.1 transmembrane GTPase Marf-like [Parasteatoda tepidariorum]
SMESG000003087.1	-2.8409	3.03605e-17	5.79723e-16	Down	gst-3	AFJ24753.1 glutathione S transferase-1 [Schmidtea mediterranea]
SMESG000003090.1	-1.25986	5.48223e-24	1.57337e-22	Down	ATP11B	XP_013406304.1 probable phospholipid-transporting ATPase IF [Lingula anatina]
SMESG000003328.1	0.827308	9.51772e-34	4.48366e-32	Up	--	AFJ24714.1 fos-1 [Schmidtea mediterranea]
SMESG000003379.1	0.950619	0.00208882	0.00783908	Up	ama-1	AQT19782.1 hypothetical protein Smed-rpb1 [Schmidtea mediterranea]
SMESG000003402.1	2.6603	9.82752e-24	2.79246e-22	Up	Cyp2u1	AWM96409.1 cytochrome P450 2K1-like protein [Dugesia japonica]
SMESG000003566.1	-0.916668	2.56022e-23	7.17514e-22	Down	--	AHD24733.1 1.C5.1 [Schmidtea mediterranea]
SMESG000003701.1	0.969065	1.81057e-19	3.98909e-18	Up	--	XP_025016786.1 uncharacterized protein LOC112538932 [Tetranychus urticae]
SMESG000003824.1	1.42954	5.00444e-19	1.06809e-17	Up	--	CDS34628.2 hypothetical transcript [Hymenolepis microstoma]
SMESG000003961.1	-0.995338	0.000324891	0.00148984	Down	Best1	XP_013416778.1 bestrophin-2 [Lingula anatina]
SMESG000004065.1	-3.39548	2.45567e-24	7.20649e-23	Down	loxl2a	OON21833.1 scavenger receptor cysteine-rich domain protein [Opisthorchis viverrini]
SMESG000004138.1	1.42691	8.50495e-09	7.97639e-08	Up	Trpv5	PAA93433.1 hypothetical protein BOX15_Mlig006500g2 [Macrostomum lignano]
SMESG000004200.1	-1.71975	1.73938e-32	7.6645e-31	Down	let-23	ANP44414.1 epidermal growth factor receptor Smed-egfr-2 [Schmidtea mediterranea]
SMESG000004201.1	-1.73039	1.03191e-26	3.38169e-25	Down	V-ERBB	ANP44414.1 epidermal growth factor receptor Smed-egfr-2 [Schmidtea mediterranea]
SMESG000004207.1	-0.922181	0.00379922	0.0132345	Down	--	XP_013421806.1 uncharacterized protein LOC106181848 [Lingula anatina]
SMESG000004221.1	1.05855	2.77918e-20	6.46115e-19	Up	ALAD	XP_022085092.1 delta-aminolevulinic acid dehydratase-like [Acanthaster planci]
SMESG000004302.1	0.852835	1.92271e-09	1.92418e-08	Up	--	XP_002422856.1 conserved hypothetical protein [Pediculus humanus corporis]
SMESG000004332.1	-0.806879	4.32439e-13	6.19916e-12	Down	--	XP_013773512.1 NTF2-related export protein 1-like [Limulus polyphemus]
SMESG000004344.1	-1.12587	5.3436e-09	5.09832e-08	Down	Mpc2	XP_013777673.1 mitochondrial pyruvate carrier 2-like [Limulus polyphemus]
SMESG000004654.1	1.24137	5.63257e-10	5.98397e-09	Up	--	XP_021359597.1 spermatogenesis-associated protein 1-like isoform X3 [Mizuhopecten yessoensis]
SMESG000004815.1	-0.989097	3.40543e-12	4.49485e-11	Down	--	XP_001621535.1 monoglyceride lipase [Nematostella vectensis]
SMESG000004840.1	2.05571	1.18763e-33	5.57639e-32	Up	EGR4	AFJ24725.1 early growth response-2, partial [Schmidtea mediterranea]
SMESG000004884.1	1.56157	5.72735e-07	4.20712e-06	Up	--	-
SMESG000004900.1	-1.23674	1.21668e-26	3.95102e-25	Down	TRPM2	XP_023931219.1 transient receptor potential cation channel subfamily M member 3 [Lingula anatina]
SMESG000004927.1	-1.29979	1.43375e-32	6.3569e-31	Down	--	-
SMESG000005010.1	-1.18127	9.34288e-53	9.29163e-51	Down	RAC1	ELU15297.1 hypothetical protein CAPTEDRAFT_171205 [Capitella teleta]
SMESG000005012.1	-3.52158	2.0993e-35	1.05859e-33	Down	RAC1	XP_032780679.1 ras-related C3 botulinum toxin substrate 1 [Daphnia magna]
SMESG000005013.1	-1.26732	7.21969e-29	2.61755e-27	Down	RAC1	TMS36896.1 hypothetical protein L596_003957 [Steinernema carpocapsae]
SMESG000005050.1	-2.0555	3.7542e-25	1.13907e-23	Down	Gaa	ELU15628.1 hypothetical protein CAPTEDRAFT_167453 [Capitella teleta]
SMESG000005054.1	-1.0697	3.30485e-53	3.35665e-51	Down	Gaa	XP_033124429.1 lysosomal alpha-glucosidase-like isoform X1 [Anneissia japonica]
SMESG000005067.1	-1.00786	3.33178e-34	1.60116e-32	Down	Grik2	TGZ73230.1 hypothetical protein CRM22_001648 [Opisthorchis felineus]
SMESG000005069.1	0.93963	5.90656e-39	3.56911e-37	Up	GAA	XP_033124429.1 lysosomal alpha-glucosidase-like isoform X1 [Anneissia japonica]
SMESG000005077.1	-1.49203	1.10787e-15	1.89744e-14	Down	--	-
SMESG000005130.1	0.854454	1.46035e-17	2.83383e-16	Up	--	AHD24754.1 X1.C.D3.1 [Schmidtea mediterranea]
SMESG000005380.1	1.35665	6.13691e-17	1.14585e-15	Up	--	-
SMESG000005418.1	-1.19541	2.20815e-46	1.81741e-44	Down	GNAI3	XP_009050193.1 hypothetical protein LOTGIDRAFT_226384 [Lottia gigantea]
SMESG000005441.1	-2.1984	1.17897e-13	1.76058e-12	Down	--	-
SMESG000005477.1	-2.38372	2.80451e-10	3.08238e-09	Down	slc47a1	AKN21701.1 slc47a-4, partial [Schmidtea mediterranea]
SMESG000005583.1	-0.80414	3.89941e-11	4.67309e-10	Down	pnc1	KAF0301170.1 Nicotinamidase [Amphibalanus amphitrite]
SMESG000005599.1	-1.23877	9.0084e-10	9.31475e-09	Down	SPAC17G8.11c	PAA77440.1 hypothetical protein BOX15_Mlig019369g1 [Macrostomum lignano]
SMESG000005601.1	1.22808	1.9976e-06	1.35452e-05	Up	GLIPR2	PAA56597.1 hypothetical protein BOX15_Mlig010086g2 [Macrostomum lignano]
SMESG000005712.1	-1.33441	5.61896e-26	1.78424e-24	Down	Ace	AFJ24765.1 angiotensin converting enzyme-1, partial [Schmidtea mediterranea]
SMESG000005713.1	0.979454	4.48557e-29	1.65561e-27	Up	Ace	AFJ24765.1 angiotensin converting enzyme-1, partial [Schmidtea mediterranea]
SMESG000005726.1	0.858432	0.000434231	0.00193425	Up	PGD	XP_016129417.1 PREDICTED: 6-phosphogluconate dehydrogenase, decarboxylating-like [Sinocyclocheilus grahami]
SMESG000005776.1	0.985829	1.74126e-17	3.3517e-16	Up	--	ANO39115.1 GCR160 [Schmidtea mediterranea]
SMESG000005914.1	0.905923	4.39839e-06	2.81454e-05	Up	CYP2R1	XP_021541454.1 vitamin D 25-hydroxylase [Neomonachus schauinslandi]
SMESG000006008.1	-1.05583	4.22199e-08	3.59471e-07	Down	--	-
SMESG000006014.1	1.37066	5.31789e-06	3.35939e-05	Up	PKM	PAA65922.1 hypothetical protein BOX15_Mlig019710g1, partial [Macrostomum lignano]
SMESG000006020.1	-0.825056	0.000831143	0.00343416	Down	--	-
SMESG000006038.1	-1.55657	1.11952e-17	2.1813e-16	Down	--	AFJ24832.1 hypothetical protein, partial [Schmidtea mediterranea]
SMESG000006040.1	4.84695	1.55094e-124	1.169e-121	Up	H2AJ	XP_025197454.1 histone H2A [Melanaphis sacchari]
SMESG000006139.1	-2.21836	1.56025e-28	5.61415e-27	Down	--	-
SMESG000006149.1	-1.08458	4.79311e-11	5.68701e-10	Down	--	-
SMESG000006521.1	0.916394	0.021592	0.0588301	Up	dmrta2	AGL61630.1 Dmd-4, partial [Schmidtea mediterranea]
SMESG000006721.1	-1.22373	8.03978e-18	1.5903e-16	Down	Slc7a11	AKN21452.1 slc7a-8 [Schmidtea mediterranea]
SMESG000006894.1	0.939178	9.89838e-11	1.14042e-09	Up	ARRB2	XP_025080363.1 beta-arrestin-1-like isoform X1 [Pomacea canaliculata]
SMESG000006950.1	0.857519	8.43375e-11	9.74816e-10	Up	--	PAA73087.1 hypothetical protein BOX15_Mlig034129g1 [Macrostomum lignano]
SMESG000007013.1	1.14777	0.000208249	0.000987203	Up	--	XP_022335585.1 tripartite motif-containing protein 2-like [Crassostrea virginica]
SMESG000007031.1	0.892265	0.0175752	0.0495851	Up	--	AKN21521.1 slc16a-26 [Schmidtea mediterranea]
SMESG000007056.1	-1.54428	6.69765e-09	6.31864e-08	Down	C17orf98	XP_021340325.1 uncharacterized protein C17orf98-like [Mizuhopecten yessoensis]
SMESG000007060.1	1.1556	3.71189e-10	4.03323e-09	Up	--	-
SMESG000007063.1	1.43725	4.38503e-05	0.000238323	Up	--	XP_032238693.1 uncharacterized protein LOC116618741, partial [Nematostella vectensis]
SMESG000007145.1	-1.9317	7.37076e-17	1.36554e-15	Down	--	-
SMESG000007159.1	-3.62693	1.84135e-47	1.55118e-45	Down	--	-
SMESG000007194.1	-1.04477	0.000174673	0.000841971	Down	--	-
SMESG000007315.1	-0.985456	3.53263e-18	7.1355e-17	Down	--	-
SMESG000007684.1	1.32935	9.13472e-40	5.73765e-38	Up	--	KAE9546932.1 hypothetical protein FO519_009856, partial [Halicephalobus sp. NKZ332]
SMESG000007767.1	-0.817594	0.00580209	0.0191204	Down	LRRC69	XP_025076050.1 leucine-rich repeat-containing protein 69-like [Pomacea canaliculata]
SMESG000007783.1	-0.831268	1.03659e-27	3.52613e-26	Down	egl-4	VUZ54328.1 unnamed protein product [Hymenolepis diminuta]
SMESG000007895.1	-1.99807	2.31844e-13	3.38109e-12	Down	DWF5	XP_013403763.1 7-dehydrocholesterol reductase [Lingula anatina]
SMESG000007996.1	1.89078	1.01357e-10	1.16589e-09	Up	--	-
SMESG000008013.1	-1.31314	8.73636e-12	1.11113e-10	Down	--	-
SMESG000008014.1	1.06342	0.0135925	0.0399298	Up	--	-
SMESG000008042.1	-1.94742	5.08906e-124	3.64402e-121	Down	--	PAA59456.1 hypothetical protein BOX15_Mlig034563g2 [Macrostomum lignano]
SMESG000008043.1	-2.42491	2.93582e-26	9.42687e-25	Down	--	PAA47666.1 hypothetical protein BOX15_Mlig027093g2, partial [Macrostomum lignano]
SMESG000008282.1	-1.11792	1.0911e-13	1.63278e-12	Down	--	XP_013417118.1 leucine-rich repeat-containing protein 74B [Lingula anatina]
SMESG000008338.1	-1.49163	1.59227e-18	3.27157e-17	Down	SEC14L2	XP_012940167.1 PREDICTED: SEC14-like protein 2 [Aplysia californica]
SMESG000008455.1	-0.944912	0.0168076	0.0477773	Down	Tkfc	XP_015754698.1 PREDICTED: triokinase/FMN cyclase-like [Acropora digitifera]
SMESG000008535.1	1.01107	0.0109708	0.033227	Up	bre-4	XP_015174394.1 PREDICTED: beta-1,4-N-acetylgalactosaminyltransferase bre-4-like [Polistes dominula]
SMESG000008541.1	-0.820094	2.94475e-16	5.24524e-15	Down	Apeh	XP_009049577.1 hypothetical protein LOTGIDRAFT_201138 [Lottia gigantea]
SMESG000008561.1	1.20123	1.65447e-08	1.49676e-07	Up	--	AKN21622.1 slc30a-2 [Schmidtea mediterranea]
SMESG000008797.1	-4.46612	5.79913e-47	4.85669e-45	Down	w	PAA63095.1 hypothetical protein BOX15_Mlig012313g3 [Macrostomum lignano]
SMESG000008854.1	1.52935	1.55628e-06	1.071e-05	Up	--	ANO39115.1 GCR160 [Schmidtea mediterranea]
SMESG000008937.1	-0.99973	6.83185e-21	1.67246e-19	Down	--	XP_013413002.1 uncharacterized protein LOC106175503 [Lingula anatina]
SMESG000009051.1	-2.42889	3.03347e-20	7.02949e-19	Down	--	-
SMESG000009072.1	-0.922797	0.00156837	0.0060803	Down	Gcnt1	XP_025105616.1 beta-1,3-galactosyl-O-glycosyl-glycoprotein beta-1,6-N-acetylglucosaminyltransferase-like [Pomacea canaliculata]
SMESG000009162.1	1.14044	0.00617337	0.0201939	Up	--	ANO39105.1 GCR149 [Schmidtea mediterranea]
SMESG000009254.1	-0.959855	4.83373e-28	1.67612e-26	Down	PAO3	XP_002611699.1 hypothetical protein BRAFLDRAFT_63612 [Branchiostoma floridae]
SMESG000009276.1	0.839271	1.22714e-15	2.09462e-14	Up	--	XP_018650548.1 hypothetical protein Smp_133680 [Schistosoma mansoni]
SMESG000009351.1	0.860031	0.0201582	0.0555557	Up	--	-
SMESG000009493.1	-3.20103	5.74055e-31	2.34218e-29	Down	Slc49a3	XP_026186447.1 solute carrier family 49 member A3 [Mastacembelus armatus]
SMESG000009561.1	-2.15846	5.27767e-12	6.82143e-11	Down	--	XP_022625709.1 TNF receptor-associated factor 2-like isoform X2 [Seriola dumerili]
SMESG000009665.1	-1.45183	5.37138e-20	1.22295e-18	Down	ELOVL	XP_029644480.1 elongation of very long chain fatty acids protein AAEL008004-like [Octopus vulgaris]
SMESG000009674.1	-1.30371	8.28073e-14	1.24961e-12	Down	RDH13	XP_017107897.1 PREDICTED: retinol dehydrogenase 12-like [Drosophila bipectinata]
SMESG000009872.1	2.25866	5.38715e-11	6.35497e-10	Up	--	KAA0197228.1 Alpha-tocopherol transfer protein [Fasciolopsis buski]
SMESG000009874.1	1.91362	3.39675e-11	4.0878e-10	Up	--	KAA0197228.1 Alpha-tocopherol transfer protein [Fasciolopsis buski]
SMESG000009876.1	-0.842034	8.63448e-32	3.68019e-30	Down	--	KAA0197228.1 Alpha-tocopherol transfer protein [Fasciolopsis buski]
SMESG000009877.1	1.08991	6.07422e-05	0.000320874	Up	--	KAA0197228.1 Alpha-tocopherol transfer protein [Fasciolopsis buski]
SMESG000009878.1	-2.1947	4.50779e-19	9.63522e-18	Down	--	KAA0197228.1 Alpha-tocopherol transfer protein [Fasciolopsis buski]
SMESG000009904.1	-1.43881	7.05849e-19	1.49533e-17	Down	Slc6a6	AKN21422.1 slc6a-2 [Schmidtea mediterranea]
SMESG000009911.1	-1.54149	8.686e-57	1.01961e-54	Down	PGGHG	RJW66951.1 Acid trehalase-like protein 1 [Clonorchis sinensis]
SMESG000009913.1	-1.49624	1.30318e-55	1.48118e-53	Down	NAGA	XP_018562147.1 alpha-N-acetylgalactosaminidase [Anoplophora glabripennis]
SMESG000009951.1	-0.833727	0.00125472	0.00496821	Down	TUBA1A	XP_013402431.1 tubulin alpha-1A chain-like isoform X2 [Lingula anatina]
SMESG000010063.1	1.06772	2.56085e-28	9.10024e-27	Up	SRY	AFD29619.1 SOXP-1 [Schmidtea mediterranea]
SMESG000010171.1	0.944144	4.86487e-20	1.11116e-18	Up	alphaTub84D	TGZ64937.1 hypothetical protein CRM22_006106 [Opisthorchis felineus]
SMESG000010407.1	-2.5347	4.93404e-51	4.71069e-49	Down	Arhgef11	XP_022246497.1 pleckstrin homology domain-containing family G member 5-like isoform X3 [Limulus polyphemus]
SMESG000010434.1	-1.04043	0.00122439	0.00486801	Down	--	XP_011423711.1 PREDICTED: coiled-coil domain-containing protein 92 [Crassostrea gigas]
SMESG000010444.1	-1.18748	1.13398e-14	1.80643e-13	Down	ABCC4	CAD24440.2 novel ABC transporter similar to human multidrug-resistance proteins (MRP) [Danio rerio]
SMESG000010464.1	-1.74069	1.14955e-31	4.84196e-30	Down	--	XP_029652974.1 E3 ubiquitin-protein ligase MIB2-like [Octopus vulgaris]
SMESG000010564.1	-1.21617	6.95944e-31	2.81543e-29	Down	--	-
SMESG000010599.1	-2.78923	3.27219e-37	1.8093e-35	Down	--	-
SMESG000010604.1	-2.42449	1.01341e-28	3.66491e-27	Down	--	-
SMESG000010665.1	1.44912	3.8811e-14	5.98291e-13	Up	--	KAA0188900.1 hypothetical protein FBUS_02218 [Fasciolopsis buski]
SMESG000010795.1	1.6638	2.14891e-20	5.01213e-19	Up	P2RX4	VDN99122.1 unnamed protein product [Rodentolepis nana]
SMESG000010838.1	-0.810592	9.32677e-07	6.6386e-06	Down	--	VEL36651.1 unnamed protein product [Protopolystoma xenopodis]
SMESG000010944.1	-1.16798	4.32126e-14	6.63999e-13	Down	--	-
SMESG000010959.1	1.23503	0.0116853	0.0350387	Up	LMAN2	XP_013381018.1 vesicular integral-membrane protein VIP36 isoform X1 [Lingula anatina]
SMESG000011194.1	1.44329	1.53025e-25	4.76407e-24	Up	--	-
SMESG000011215.1	1.71829	5.49258e-55	6.09762e-53	Up	--	-
SMESG000011275.1	0.898433	5.36848e-24	1.54381e-22	Up	--	-
SMESG000011359.1	1.88388	1.2799e-26	4.14694e-25	Up	--	-
SMESG000011690.1	-1.00883	4.04057e-28	1.40449e-26	Down	Abhd4	NP_001017287.1 (Lyso)-N-acylphosphatidylethanolamine lipase [Xenopus tropicalis]
SMESG000011782.1	-0.950575	1.57154e-17	3.03724e-16	Down	--	-
SMESG000011865.1	-0.827393	9.07252e-40	5.72368e-38	Down	DNPEP	XP_013413903.1 aspartyl aminopeptidase [Lingula anatina]
SMESG000011941.1	-0.920545	1.8057e-21	4.57688e-20	Down	AP3S2	XP_013771980.1 AP-3 complex subunit sigma-2-like [Limulus polyphemus]
SMESG000012127.1	1.56733	1.67892e-78	3.33943e-76	Up	sepA	Q8T2I8.1 RecName: Full=Serine/threonine-protein kinase sepA; AltName: Full=Septase A [Dictyostelium discoideum]
SMESG000012131.1	1.78112	1.27628e-47	1.08151e-45	Up	sepA	Q8T2I8.1 RecName: Full=Serine/threonine-protein kinase sepA; AltName: Full=Septase A [Dictyostelium discoideum]
SMESG000012330.1	-0.95644	5.96008e-11	6.98481e-10	Down	--	-
SMESG000012339.1	-1.45737	4.9921e-21	1.23475e-19	Down	--	AYA22141.1 TNF receptor-associated factor 3 [Mytilus coruscus]
SMESG000012534.1	-1.12081	2.40477e-64	3.51416e-62	Down	CYP1A1	XP_019642124.1 PREDICTED: cytochrome P450 1A1-like [Branchiostoma belcheri]
SMESG000012542.1	0.833015	5.25957e-16	9.27615e-15	Up	--	-
SMESG000012543.1	0.985789	1.09371e-11	1.37515e-10	Up	--	ANC28276.1 epidermal growth factor-8 [Schmidtea mediterranea]
SMESG000012601.1	-1.15329	9.45079e-06	5.72283e-05	Down	--	XP_022331549.1 testis-expressed protein 43-like [Crassostrea virginica]
SMESG000012972.1	-1.09978	2.67195e-42	1.89431e-40	Down	dstyk	XP_027236014.1 dual serine/threonine and tyrosine protein kinase-like [Penaeus vannamei]
SMESG000012973.1	-1.03754	6.64574e-39	3.99889e-37	Down	DSTYK	PAA55491.1 hypothetical protein BOX15_Mlig027899g3 [Macrostomum lignano]
SMESG000013107.1	0.802739	3.1864e-08	2.7757e-07	Up	Ci-DRIL1/2	RNA16560.1 dead ringer -like protein [Brachionus plicatilis]
SMESG000013576.1	-0.837158	2.91816e-18	5.93621e-17	Down	Tmc5	XP_022316578.1 uncharacterized protein LOC111120145 [Crassostrea virginica]
SMESG000013579.1	-0.924138	0.000163023	0.000790601	Down	--	-
SMESG000013622.1	-1.4592	2.17112e-46	1.79726e-44	Down	slc5a9	AKN21417.1 slc5a-2 [Schmidtea mediterranea]
SMESG000013689.1	-2.0003	4.0583e-10	4.38965e-09	Down	slc9a3	AKN21460.1 slc9a-1 [Schmidtea mediterranea]
SMESG000013697.1	-1.56726	1.01168e-57	1.2175e-55	Down	CYP2G1	QCQ73702.1 P450 2B-like protein [Dugesia japonica]
SMESG000013701.1	-0.862472	1.10582e-12	1.52567e-11	Down	CYP2U1	QCQ73702.1 P450 2B-like protein [Dugesia japonica]
SMESG000013713.1	-0.908373	2.56879e-06	1.70708e-05	Down	--	-
SMESG000013769.1	-1.21027	4.98063e-20	1.13579e-18	Down	CYP3A29	XP_021342534.1 cytochrome P450 3A2-like [Mizuhopecten yessoensis]
SMESG000013770.1	-1.10905	8.5475e-16	1.47837e-14	Down	CYP3A8	AFK08979.1 cytochrome P450 CYP6BQ13, partial [Dastarcus helophoroides]
SMESG000013783.1	-1.5108	7.75361e-22	2.01158e-20	Down	Cyp3a9	AAC52582.1 cytochrome P450 3A9 [Rattus norvegicus]
SMESG000013908.1	0.887357	3.11915e-19	6.72732e-18	Up	--	-
SMESG000014122.1	0.84469	1.90338e-20	4.46858e-19	Up	--	XP_031622724.1 signal transducer and transcription activator-like [Contarinia nasturtii]
SMESG000014166.1	-2.04943	1.31445e-18	2.72027e-17	Down	LCP2	AWM96389.1 cathepsin L2 [Dugesia japonica]
SMESG000014167.1	-2.17511	7.69954e-13	1.07786e-11	Down	LCP2	AWM96389.1 cathepsin L2 [Dugesia japonica]
SMESG000014399.1	-2.24822	3.22757e-41	2.17005e-39	Down	--	OMJ70210.1 hypothetical protein SteCoe_31865 [Stentor coeruleus]
SMESG000014523.1	-1.6387	9.05378e-32	3.84745e-30	Down	--	-
SMESG000014542.1	-1.9943	1.15067e-38	6.75358e-37	Down	--	-
SMESG000014544.1	-2.053	4.90166e-21	1.21658e-19	Down	--	-
SMESG000014554.1	-2.2045	9.43204e-12	1.19325e-10	Down	--	-
SMESG000014578.1	-2.47611	3.69132e-12	4.85877e-11	Down	--	-
SMESG000014710.1	-3.69518	1.15586e-282	8.27656e-279	Down	--	-
SMESG000014711.1	-2.6064	1.04681e-154	1.49914e-151	Down	--	-
SMESG000014712.1	-0.912231	0.000478092	0.00210669	Down	--	XP_020913585.1 TNF receptor-associated factor 6 isoform X2 [Exaiptasia pallida]
SMESG000014753.1	0.895547	9.85718e-30	3.71486e-28	Up	Marf	VVC36185.1 Dynamin superfamily,Fzo/mitofusin HR2 domain,P-loop containing nucleoside triphosphate hydrolase,Dynamin- [Cinara cedri]
SMESG000014759.1	2.34901	1.25912e-30	4.9538e-29	Up	Marf	XP_019894310.1 PREDICTED: transmembrane GTPase Marf isoform X3 [Musca domestica]
SMESG000014761.1	2.34782	3.42835e-87	9.62693e-85	Up	--	KFM65406.1 Transmembrane GTPase Marf, partial [Stegodyphus mimosarum]
SMESG000014762.1	2.95657	2.504e-148	2.56142e-145	Up	--	ODM94964.1 Transmembrane GTPase Marf [Orchesella cincta]
SMESG000014768.1	-1.07398	2.02617e-07	1.57358e-06	Down	--	-
SMESG000014769.1	1.03293	2.34037e-09	2.31947e-08	Up	--	-
SMESG000014780.1	-2.15833	5.4806e-10	5.83118e-09	Down	--	XP_011403816.1 PREDICTED: TNF receptor-associated factor 4-like [Amphimedon queenslandica]
SMESG000014792.1	-0.806488	1.28863e-13	1.91834e-12	Down	--	-
SMESG000014940.1	-0.853033	7.60859e-06	4.6725e-05	Down	PAK2	XP_014118479.1 PREDICTED: serine/threonine-protein kinase PAK 3-like, partial [Pseudopodoces humilis]
SMESG000014992.1	-1.06134	0.00186659	0.00709997	Down	--	-
SMESG000014996.1	-1.98289	3.14199e-21	7.82546e-20	Down	--	XP_027041482.1 TNF receptor-associated factor 5-like [Pocillopora damicornis]
SMESG000015004.1	1.00477	0.000836979	0.00345528	Up	--	-
SMESG000015079.1	-0.831633	0.000171169	0.000827585	Down	--	-
SMESG000015083.1	-1.13969	1.2278e-17	2.3858e-16	Down	--	-
SMESG000015136.1	0.886041	0.0186334	0.0520783	Up	xhox3	PAA78443.1 hypothetical protein BOX15_Mlig024179g3 [Macrostomum lignano]
SMESG000015143.1	-0.808863	3.57553e-25	1.08947e-23	Down	FABP4	XP_032877086.1 fatty acid-binding protein, brain [Amblyraja radiata]
SMESG000015162.1	-1.71298	2.18183e-103	9.46848e-101	Down	MCOLN3	BAP40094.1 transient receptor potential ion channel ML a, partial [Dugesia japonica]
SMESG000015175.1	-3.98898	2.05842e-61	2.75502e-59	Down	--	-
SMESG000015187.1	-2.70609	3.24592e-37	1.80174e-35	Down	RAC1	XP_023035974.1 ras-like GTP-binding protein RhoL [Drosophila willistoni]
SMESG000015393.1	-0.819706	2.78506e-06	1.84225e-05	Down	--	RJW65758.1 Ataxin-7-like protein 3 [Clonorchis sinensis]
SMESG000015405.1	1.51594	1.38935e-05	8.18804e-05	Up	PPP4C	XP_015433781.1 PREDICTED: serine/threonine-protein phosphatase 4 catalytic subunit [Dufourea novaeangliae]
SMESG000015477.1	-1.01263	4.3216e-05	0.000235202	Down	--	-
SMESG000015619.1	-0.923885	1.02074e-17	1.997e-16	Down	trc	XP_012800450.1 Serine/threonine-protein kinase 38-like [Schistosoma haematobium]
SMESG000015806.1	-1.74998	1.5674e-13	2.31888e-12	Down	--	-
SMESG000015807.1	-1.80265	6.75307e-07	4.91916e-06	Down	--	-
SMESG000015831.1	-1.34986	1.59052e-55	1.79353e-53	Down	SRC	THD23481.1 Proto-oncogene tyrosine-protein kinase Yrk [Fasciola hepatica]
SMESG000015901.1	-0.982606	0.0241563	0.0644925	Down	--	-
SMESG000016036.1	-1.04521	9.20351e-26	2.90316e-24	Down	rab-11.1	KAF0979410.1 hypothetical protein FDP41_001753 [Naegleria fowleri]
SMESG000016079.1	0.859402	3.57248e-06	2.33508e-05	Up	sta	RWS20872.1 putative ribosomal protein SA-like protein [Leptotrombidium deliense]
SMESG000016088.1	-3.38174	3.19566e-45	2.51456e-43	Down	PRSS12	PAA71212.1 hypothetical protein BOX15_Mlig019787g1 [Macrostomum lignano]
SMESG000016089.1	-3.58412	3.06174e-69	4.766e-67	Down	PRSS12	PAA71212.1 hypothetical protein BOX15_Mlig019787g1 [Macrostomum lignano]
SMESG000016189.1	-1.7051	4.22991e-81	9.7704e-79	Down	tmem41aa	XP_014681253.1 PREDICTED: transmembrane protein 41A-like [Priapulus caudatus]
SMESG000016195.1	-0.879687	8.87816e-52	8.64926e-50	Down	Aldh2	QFQ66890.1 ALDH2-like protein [Schmidtea mediterranea]
SMESG000016213.1	-2.51511	2.19066e-53	2.24089e-51	Down	NAGA	XP_973373.1 PREDICTED: alpha-N-acetylgalactosaminidase isoform X2 [Tribolium castaneum]
SMESG000016261.1	-1.72092	9.35935e-36	4.80413e-34	Down	Gucy1b2	QFQ66871.1 gucy1b2 protein [Schmidtea mediterranea]
SMESG000016284.1	-1.58811	1.80742e-07	1.41366e-06	Down	pkaC	XP_023233184.1 cAMP-dependent protein kinase catalytic subunit beta-like isoform X1 [Centruroides sculpturatus]
SMESG000016290.1	-0.817064	1.91665e-09	1.91947e-08	Down	BEST3	PAA75944.1 hypothetical protein BOX15_Mlig021055g1 [Macrostomum lignano]
SMESG000016297.1	-0.951722	2.70532e-41	1.82749e-39	Down	Best2	PAA75942.1 hypothetical protein BOX15_Mlig030079g1 [Macrostomum lignano]
SMESG000016373.1	-1.33067	1.3385e-06	9.27814e-06	Down	--	-
SMESG000016389.1	-1.62085	1.11223e-66	1.69449e-64	Down	--	XP_022090273.1 ribonuclease Oy-like isoform X1 [Acanthaster planci]
SMESG000016407.1	-1.76268	1.38725e-28	5.00423e-27	Down	--	XP_021351011.1 uncharacterized protein LOC110448862 isoform X2 [Mizuhopecten yessoensis]
SMESG000016412.1	0.989956	1.32868e-18	2.74574e-17	Up	slc25a30	AKN21592.1 slc25a-24 [Schmidtea mediterranea]
SMESG000016449.1	0.895724	0.000497929	0.00218269	Up	--	THD25725.1 Peptide G protein-coupled receptor [Fasciola hepatica]
SMESG000016714.1	1.06538	5.62645e-08	4.70656e-07	Up	--	ANO39112.1 GCR157 [Schmidtea mediterranea]
SMESG000016720.1	-2.20166	1.12403e-54	1.22879e-52	Down	Nucb2	XP_031151094.1 nucleobindin-2 [Sander lucioperca]
SMESG000016757.1	1.33818	1.40778e-15	2.39724e-14	Up	--	-
SMESG000016771.1	1.51856	3.13861e-17	5.97713e-16	Up	--	-
SMESG000016772.1	1.77424	2.47615e-45	1.95917e-43	Up	--	-
SMESG000016777.1	1.87671	2.29798e-59	2.91233e-57	Up	--	-
SMESG000016778.1	1.32775	2.07199e-21	5.23333e-20	Up	--	-
SMESG000016779.1	0.849713	1.67502e-07	1.31441e-06	Up	--	-
SMESG000016780.1	1.35875	3.67075e-42	2.5769e-40	Up	--	-
SMESG000016782.1	1.2816	2.73104e-05	0.000153618	Up	--	-
SMESG000016789.1	1.31976	1.12374e-06	7.90037e-06	Up	--	-
SMESG000016790.1	-0.809979	7.53343e-07	5.43508e-06	Down	--	-
SMESG000016810.1	1.60529	1.71878e-106	8.20487e-104	Up	--	-
SMESG000016811.1	1.35828	4.77687e-22	1.25292e-20	Up	--	-
SMESG000016812.1	0.861381	1.22804e-16	2.24894e-15	Up	--	-
SMESG000016829.1	-0.939466	3.66592e-26	1.16926e-24	Down	HSD17B14	XP_025086573.1 17-beta-hydroxysteroid dehydrogenase 14-like [Pomacea canaliculata]
SMESG000016872.1	-0.898326	4.08078e-06	2.63484e-05	Down	rskn-1	OMJ72106.1 hypothetical protein SteCoe_29537 [Stentor coeruleus]
SMESG000016874.1	1.02313	4.44646e-12	5.79416e-11	Up	--	-
SMESG000016934.1	0.82875	8.54794e-18	1.68848e-16	Up	Slc39a1	AKN21676.1 slc39a-11 [Schmidtea mediterranea]
SMESG000016936.1	1.16136	2.00021e-17	3.83981e-16	Up	CASP3	QDF63032.1 caspase-3C [Dugesia japonica]
SMESG000016940.1	-0.869209	1.12041e-13	1.67488e-12	Down	--	-
SMESG000016956.1	1.06472	0.000158323	0.000769635	Up	--	-
SMESG000016995.1	1.87443	3.22804e-32	1.40941e-30	Up	--	XP_025083284.1 saxiphilin-like [Pomacea canaliculata]
SMESG000017013.1	-2.52566	8.14498e-31	3.27653e-29	Down	--	-
SMESG000017016.1	-0.966742	6.35554e-47	5.29173e-45	Down	--	-
SMESG000017042.1	-0.809251	5.36306e-07	3.94678e-06	Down	--	XP_009066209.1 hypothetical protein LOTGIDRAFT_133974, partial [Lottia gigantea]
SMESG000017098.1	-1.3117	9.55448e-19	1.99751e-17	Down	--	-
SMESG000017126.1	-1.21473	0.000708215	0.00297779	Down	--	-
SMESG000017135.1	-1.45564	4.17861e-35	2.07784e-33	Down	--	-
SMESG000017142.1	-1.44877	7.88428e-36	4.10585e-34	Down	Nucb2	ASK86275.1 nucleobindin nesfatin precursor, partial [Ophionotus victoriae]
SMESG000017149.1	-1.01797	0.00434829	0.0148585	Down	--	-
SMESG000017203.1	-1.57467	7.51839e-43	5.46553e-41	Down	--	VDN98900.1 unnamed protein product [Rodentolepis nana]
SMESG000017211.1	-1.46971	6.20926e-62	8.46883e-60	Down	ANP2	XP_023801697.1 serine/threonine-protein kinase PAK 3-like [Cyanistes caeruleus]
SMESG000017213.1	-3.1555	5.71758e-28	1.97781e-26	Down	--	XP_033110386.1 leucine-rich melanocyte differentiation-associated protein-like [Anneissia japonica]
SMESG000017214.1	-1.41615	4.74204e-43	3.4826e-41	Down	--	KAA3676080.1 uncharacterized protein DEA37_0012169 [Paragonimus westermani]
SMESG000017270.1	-0.94409	2.44243e-07	1.87953e-06	Down	--	-
SMESG000017276.1	-0.90176	5.42212e-25	1.63474e-23	Down	--	-
SMESG000017306.1	-0.973012	1.68013e-12	2.285e-11	Down	FAIM	XP_013392071.1 fas apoptotic inhibitory molecule 1 isoform X1 [Lingula anatina]
SMESG000017490.1	-0.885615	5.75142e-13	8.13091e-12	Down	--	PAA53143.1 hypothetical protein BOX15_Mlig024320g4, partial [Macrostomum lignano]
SMESG000017517.1	-1.30316	4.27565e-16	7.56881e-15	Down	MACF1	XP_019922392.1 PREDICTED: microtubule-actin cross-linking factor 1, isoforms 1/2/3/5 isoform X8 [Crassostrea gigas]
SMESG000017519.1	-1.40257	6.0219e-81	1.36888e-78	Down	--	XP_013080792.1 PREDICTED: microtubule-actin cross-linking factor 1-like isoform X1 [Biomphalaria glabrata]
SMESG000017520.1	-1.55184	2.18923e-32	9.58777e-31	Down	--	-
SMESG000017522.1	-1.81665	6.20828e-06	3.88078e-05	Down	--	XP_013386319.2 LOW QUALITY PROTEIN: microtubule-actin cross-linking factor 1, isoforms 1/2/3/5-like [Lingula anatina]
SMESG000017801.1	-1.50145	0.000471744	0.00208321	Down	--	-
SMESG000017831.1	0.808249	0.00881264	0.027442	Up	--	TRY83570.1 hypothetical protein DNTS_016277 [Danionella translucida]
SMESG000017994.1	-0.981073	0.00783025	0.0247652	Down	tctex1d1-b	XP_013403350.1 tctex1 domain-containing protein 2-like [Lingula anatina]
SMESG000018042.1	-1.80236	4.11085e-41	2.751e-39	Down	oxlT	AKN21500.1 slc16a-5, partial [Schmidtea mediterranea]
SMESG000018052.1	-1.32628	2.55062e-08	2.24923e-07	Down	tctex1d1-b	XP_013403350.1 tctex1 domain-containing protein 2-like [Lingula anatina]
SMESG000018135.1	-1.73968	2.10316e-24	6.18466e-23	Down	--	-
SMESG000018453.1	1.6926	7.15657e-10	7.47551e-09	Up	Plg	AFJ24868.1 plasminogen-1, partial [Schmidtea mediterranea]
SMESG000018472.1	-3.0362	8.02636e-76	1.45501e-73	Down	--	-
SMESG000018611.1	0.805595	7.24358e-05	0.000376808	Up	--	PAA76062.1 hypothetical protein BOX15_Mlig017883g2, partial [Macrostomum lignano]
SMESG000018616.1	-1.01969	0.00831686	0.0261025	Down	--	-
SMESG000018637.1	0.835431	0.000368846	0.00167054	Up	--	VDD83153.1 unnamed protein product [Mesocestoides corti]
SMESG000018666.1	0.928223	5.23033e-17	9.88174e-16	Up	BOLL	ANE21796.1 boule 1 RNA-binding protein [Schmidtea mediterranea]
SMESG000018708.1	-3.40017	5.79023e-85	1.50767e-82	Down	--	PAA47753.1 hypothetical protein BOX15_Mlig014729g1 [Macrostomum lignano]
SMESG000018759.1	-1.2597	2.01406e-16	3.63267e-15	Down	Hsd17b13	XP_013380984.1 epidermal retinol dehydrogenase 2 isoform X1 [Lingula anatina]
SMESG000018760.1	0.838701	3.2738e-28	1.14631e-26	Up	--	XP_022310727.1 uncharacterized protein ZC84.1-like isoform X10 [Crassostrea virginica]
SMESG000018798.1	-3.74744	2.76231e-50	2.51968e-48	Down	--	-
SMESG000018810.1	0.943734	5.97111e-08	4.97164e-07	Up	CHRM5	ANO38997.1 GCR015 [Schmidtea mediterranea]
SMESG000018862.1	-1.20707	1.86686e-23	5.26285e-22	Down	PTPN1	NP_001017121.2 tyrosine-protein phosphatase non-receptor type 1 [Xenopus tropicalis]
SMESG000019281.1	-1.46004	7.27303e-15	1.17294e-13	Down	TRAF3	XP_003387035.1 PREDICTED: TNF receptor-associated factor 3-like [Amphimedon queenslandica]
SMESG000019381.1	-0.896421	2.87912e-55	3.22124e-53	Down	Fkbp15	XP_028312149.1 FK506-binding protein 15 isoform X3 [Gouania willdenowi]
SMESG000019504.1	-0.935564	2.41807e-06	1.61516e-05	Down	SLC11A2	AKN21474.1 slc11a-1 [Schmidtea mediterranea]
SMESG000019783.1	-1.13017	4.70875e-30	1.81274e-28	Down	--	-
SMESG000019836.1	-0.82321	2.30412e-33	1.06787e-31	Down	PSAT1	XP_019617740.1 PREDICTED: phosphoserine aminotransferase-like [Branchiostoma belcheri]
SMESG000019866.1	-0.956498	1.79845e-05	0.00010474	Down	--	-
SMESG000019976.1	-1.00324	9.90045e-27	3.25194e-25	Down	--	VDM18769.1 unnamed protein product [Hydatigera taeniaeformis]
SMESG000019977.1	1.58444	2.56111e-19	5.57411e-18	Up	--	KTG41371.1 hypothetical protein cypCar_00016186 [Cyprinus carpio]
SMESG000019984.1	-1.4289	2.95955e-15	4.90552e-14	Down	--	-
SMESG000020012.1	-1.32838	6.35332e-05	0.000334753	Down	--	AHD24730.1 X1.C4.1 [Schmidtea mediterranea]
SMESG000020135.1	-0.962734	1.22804e-38	7.17828e-37	Down	Traf3	XP_032903252.1 TNF receptor-associated factor 2-like [Amblyraja radiata]
SMESG000020158.1	1.14858	2.26721e-27	7.65773e-26	Up	--	VDL90377.1 unnamed protein product [Schistocephalus solidus]
SMESG000020236.1	-0.944322	9.06771e-06	5.50482e-05	Down	TMT1	XP_022096077.1 putative methyltransferase DDB_G0268948 isoform X3 [Acanthaster planci]
SMESG000020242.1	1.18526	0.00384222	0.0133587	Up	RORA	CDS27504.1 nuclear receptor 2DBD gamma [Hymenolepis microstoma]
SMESG000020470.1	-1.83406	1.60873e-64	2.37512e-62	Down	Cyp2j6	QCQ73702.1 P450 2B-like protein [Dugesia japonica]
SMESG000020475.1	-0.838723	8.89678e-07	6.35782e-06	Down	FAM102B	VDP33269.1 unnamed protein product [Schistosoma curassoni]
SMESG000020517.1	-2.74714	1.03731e-30	4.12647e-29	Down	--	-
SMESG000020554.1	-3.29834	4.43356e-35	2.19699e-33	Down	--	AKN21633.1 slc31a-3 [Schmidtea mediterranea]
SMESG000020707.1	1.14047	0.000864221	0.00355647	Up	TRPC2	PAA75723.1 hypothetical protein BOX15_Mlig014653g1 [Macrostomum lignano]
SMESG000020709.1	2.28873	1.30936e-79	2.71758e-77	Up	Trpc2	PAA54089.1 hypothetical protein BOX15_Mlig025367g1 [Macrostomum lignano]
SMESG000020729.1	1.12215	6.64699e-15	1.07683e-13	Up	--	-
SMESG000020731.1	1.21724	0.00340528	0.0120323	Up	--	-
SMESG000020864.1	-1.38673	1.07915e-07	8.66768e-07	Down	--	XP_005929372.1 PREDICTED: lipopolysaccharide-induced tumor necrosis factor-alpha factor homolog isoform X2 [Haplochromis burtoni]
SMESG000020865.1	-0.899033	8.07421e-13	1.12591e-11	Down	--	RXM32455.1 Protein disulfide-isomerase [Acipenser ruthenus]
SMESG000020883.1	0.853792	5.48055e-06	3.4515e-05	Up	--	-
SMESG000020889.1	-1.86132	8.54394e-20	1.92084e-18	Down	--	-
SMESG000020952.1	-1.80758	9.76359e-65	1.4565e-62	Down	--	VDQ11758.1 unnamed protein product [Trichobilharzia regenti]
SMESG000020954.1	-1.31281	9.5012e-08	7.70479e-07	Down	--	VEL28591.1 unnamed protein product [Protopolystoma xenopodis]
SMESG000020955.1	-3.47976	3.28498e-40	2.10961e-38	Down	--	VDQ11758.1 unnamed protein product [Trichobilharzia regenti]
SMESG000021283.1	-0.9745	4.76604e-22	1.25238e-20	Down	l3hypdh	XP_013406160.1 trans-L-3-hydroxyproline dehydratase-like [Lingula anatina]
SMESG000021388.1	-1.118	4.3243e-25	1.30927e-23	Down	--	-
SMESG000021419.1	-1.44752	1.31924e-39	8.14346e-38	Down	Mogat2	XP_011426483.1 PREDICTED: 2-acylglycerol O-acyltransferase 2-A [Crassostrea gigas]
SMESG000021434.1	1.02813	0.00181538	0.00693281	Up	FOXI1	XP_023241034.1 forkhead box protein C2-like [Centruroides sculpturatus]
SMESG000021439.1	-2.50268	3.55991e-35	1.77636e-33	Down	--	-
SMESG000021782.1	-1.05796	5.47028e-30	2.09465e-28	Down	--	-
SMESG000021878.1	-0.952036	0.0137167	0.0402123	Down	--	-
SMESG000021912.1	-3.34968	7.22309e-53	7.28463e-51	Down	--	XP_015351526.1 PREDICTED: COX assembly mitochondrial protein 2 homolog isoform X1 [Marmota marmota marmota]
SMESG000022030.1	-1.22154	3.42532e-49	2.97297e-47	Down	Ephx4	XP_013388618.1 epoxide hydrolase 4 [Lingula anatina]
SMESG000022049.1	-2.3195	1.42835e-126	1.20326e-123	Down	--	-
SMESG000022051.1	-1.41118	1.3833e-41	9.47855e-40	Down	ada	XP_013390246.2 adenosine deaminase-like isoform X1 [Lingula anatina]
SMESG000022101.1	-1.0179	0.00242276	0.00891133	Down	Cyp2b19	AWM96409.1 cytochrome P450 2K1-like protein [Dugesia japonica]
SMESG000022115.1	-1.26911	1.04448e-07	8.40812e-07	Down	--	-
SMESG000022139.1	-1.93561	8.29406e-116	4.94913e-113	Down	--	-
SMESG000022278.1	-1.57028	6.50658e-31	2.63968e-29	Down	Trhde	AFJ24858.1 hypothetical protein, partial [Schmidtea mediterranea]
SMESG000022279.1	-1.60603	1.25115e-25	3.92073e-24	Down	ANPEP	AFJ24858.1 hypothetical protein, partial [Schmidtea mediterranea]
SMESG000022315.1	1.38491	0.000144157	0.000707251	Up	angel2	EEC02013.1 conserved hypothetical protein [Ixodes scapularis]
SMESG000022356.1	0.978137	2.17453e-10	2.42724e-09	Up	TFAP2A	AFJ24713.1 ap2 [Schmidtea mediterranea]
SMESG000022393.1	0.88974	0.000199538	0.00095031	Up	--	-
SMESG000022410.1	-0.811951	1.98993e-07	1.54711e-06	Down	--	-
SMESG000022577.1	1.19171	2.86702e-26	9.22664e-25	Up	Thsd7a	RTG89782.1 uncharacterized protein DC041_0003935 [Schistosoma bovis]
SMESG000022739.1	-1.79178	7.98531e-19	1.68173e-17	Down	GGACT	RVE42378.1 hypothetical protein evm_012999 [Chilo suppressalis]
SMESG000022742.1	3.65857	3.23896e-70	5.21181e-68	Up	--	-
SMESG000022750.1	-3.86224	6.05344e-35	2.97908e-33	Down	--	ANP44407.1 epidermal growth factor Smed-egf-2 [Schmidtea mediterranea]
SMESG000022751.1	-1.23767	7.70778e-44	5.71933e-42	Down	CYP2U1	QCQ73702.1 P450 2B-like protein [Dugesia japonica]
SMESG000022809.1	-1.78464	4.42989e-62	6.15926e-60	Down	SLC8B1	AKN21565.1 slc24a-5 [Schmidtea mediterranea]
SMESG000022839.1	-3.37118	1.45748e-35	7.4016e-34	Down	--	-
SMESG000022856.1	-2.38906	9.39319e-12	1.19044e-10	Down	lhx1a	XP_022803726.1 LOW QUALITY PROTEIN: LIM/homeobox protein Lhx1-like [Stylophora pistillata]
SMESG000022857.1	-1.31196	1.49174e-67	2.29712e-65	Down	Sgk3	XP_029649968.1 serine/threonine-protein kinase Sgk1-like isoform X4 [Octopus vulgaris]
SMESG000022898.1	-2.67395	9.00574e-12	1.14438e-10	Down	Slc36a2	AKN21654.1 slc36a-1 [Schmidtea mediterranea]
SMESG000022911.1	1.6077	2.0827e-11	2.55144e-10	Up	F_48D10.1	ANO39033.1 GCR060 [Schmidtea mediterranea]
SMESG000023063.1	-1.22304	4.08812e-11	4.88137e-10	Down	Pdlim5	VDP17669.1 unnamed protein product [Schistosoma margrebowiei]
SMESG000023205.1	-1.26789	1.89168e-13	2.77854e-12	Down	Cyt-b5	ABF67509.1 cytochrome b5 [Haliotis discus discus]
SMESG000023221.1	-1.43556	1.81093e-16	3.28245e-15	Down	--	-
SMESG000023234.1	1.08604	2.34446e-13	3.41557e-12	Up	--	-
SMESG000023289.1	0.893866	3.81731e-38	2.16935e-36	Up	NLK	AFD29625.1 NLK-1 [Schmidtea mediterranea]
SMESG000023324.1	-1.25311	7.7044e-11	8.92676e-10	Down	--	AKN21493.1 slc15a-7, partial [Schmidtea mediterranea]
SMESG000023353.1	1.86554	5.22747e-109	2.58147e-106	Up	AGAP008842	BAR87948.1 aquaporin [Dugesia japonica]
SMESG000023359.1	-1.32149	1.85883e-21	4.70324e-20	Down	slc38a7	AKN21660.1 slc38a-1 [Schmidtea mediterranea]
SMESG000023427.1	1.3799	5.23262e-11	6.17777e-10	Up	--	-
SMESG000023429.1	0.803901	1.69689e-13	2.50528e-12	Up	DOK3	KAA0198405.1 hypothetical protein FBUS_06001, partial [Fasciolopsis buski]
SMESG000023528.1	-2.263	4.69348e-39	2.87245e-37	Down	CYP2U1	PAA79583.1 hypothetical protein BOX15_Mlig006662g3 [Macrostomum lignano]
SMESG000023530.1	-1.86153	1.88828e-23	5.31278e-22	Down	CYP2C30	PAA79583.1 hypothetical protein BOX15_Mlig006662g3 [Macrostomum lignano]
SMESG000023628.1	1.15015	1.02255e-06	7.23154e-06	Up	Atm	XP_012558729.1 PREDICTED: LOW QUALITY PROTEIN: serine-protein kinase ATM-like [Hydra vulgaris]
SMESG000023649.1	-1.19305	2.44449e-73	4.21777e-71	Down	--	-
SMESG000023662.1	-1.56708	5.82762e-15	9.50538e-14	Down	--	AWV63261.1 tgs-1 [Schmidtea mediterranea]
SMESG000023842.1	-1.20184	3.10625e-17	5.92338e-16	Down	--	PAA53120.1 hypothetical protein BOX15_Mlig018526g3 [Macrostomum lignano]
SMESG000024118.1	-2.49004	4.73703e-58	5.79821e-56	Down	Fuca2	XP_033100644.1 alpha-L-fucosidase-like [Anneissia japonica]
SMESG000024141.1	-2.6913	2.24973e-49	1.98879e-47	Down	--	-
SMESG000024294.1	1.01546	0.00150061	0.0058455	Up	--	-
SMESG000024379.1	1.37846	3.50201e-08	3.02852e-07	Up	Grm3	ANO39069.1 GCR106 [Schmidtea mediterranea]
SMESG000024476.1	1.05172	3.52654e-07	2.6525e-06	Up	--	-
SMESG000024478.1	1.58909	1.74543e-06	1.192e-05	Up	--	AFJ24736.1 hypothetical protein, partial [Schmidtea mediterranea]
SMESG000024479.1	-1.10186	9.81879e-40	6.14039e-38	Down	--	-
SMESG000024498.1	0.894667	0.0236942	0.0635084	Up	--	DAA33925.1 TPA_inf: neuropeptide precursor-1 [Schmidtea mediterranea]
SMESG000024525.1	-0.944206	9.65624e-19	2.01291e-17	Down	Slc13a5	AKN21480.1 slc13a-1 [Schmidtea mediterranea]
SMESG000024526.1	-0.888872	1.4861e-11	1.84583e-10	Down	Slc13a5	AKN21480.1 slc13a-1 [Schmidtea mediterranea]
SMESG000024592.1	-2.1069	1.26966e-11	1.58387e-10	Down	--	AYA22141.1 TNF receptor-associated factor 3 [Mytilus coruscus]
SMESG000024663.1	2.17164	4.74588e-82	1.11419e-79	Up	--	XP_032782336.1 uncharacterized protein LOC116920275 [Daphnia magna]
SMESG000024669.1	-1.78124	3.52549e-22	9.36707e-21	Down	--	XP_028517423.1 uncharacterized protein LOC114575902 [Exaiptasia pallida]
SMESG000024670.1	-0.944676	1.96318e-49	1.77839e-47	Down	HMBS	CDS37641.1 porphobilinogen deaminase [Echinococcus multilocularis]
SMESG000024727.1	-0.863787	9.09016e-27	2.99265e-25	Down	--	VDK75410.1 unnamed protein product [Onchocerca ochengi]
SMESG000024739.1	-2.25352	2.12095e-151	2.33647e-148	Down	Acsl5	XP_013086264.1 PREDICTED: long-chain-fatty-acid--CoA ligase 1-like isoform X2 [Biomphalaria glabrata]
SMESG000024833.1	-3.40315	2.39067e-41	1.63032e-39	Down	INHBA	AGX01005.1 activin 1 [Schmidtea mediterranea]
SMESG000024922.1	-1.05559	2.55369e-13	3.70906e-12	Down	--	-
SMESG000025075.1	-1.64175	1.3016e-39	8.06938e-38	Down	miox	XP_013420799.1 inositol oxygenase [Lingula anatina]
SMESG000025143.1	-2.54618	1.77671e-17	3.41533e-16	Down	ACR	KAA0187698.1 Mastin [Fasciolopsis buski]
SMESG000025344.1	-1.36304	2.05291e-05	0.000118119	Down	--	-
SMESG000025346.1	1.22462	2.93939e-06	1.93986e-05	Up	--	-
SMESG000025375.1	-2.00666	2.10306e-13	3.07012e-12	Down	FER1	RNA21358.1 ferritin [Brachionus plicatilis]
SMESG000025410.1	-3.5436	2.11639e-61	2.80637e-59	Down	--	-
SMESG000025482.1	1.01953	7.35474e-19	1.5535e-17	Up	--	XP_023231660.1 Krueppel-like factor 11 isoform X2 [Centruroides sculpturatus]
SMESG000025547.1	-1.4076	1.77639e-13	2.61724e-12	Down	Muc2	PAA50248.1 hypothetical protein BOX15_Mlig026350g2, partial [Macrostomum lignano]
SMESG000025574.1	1.00562	1.42756e-14	2.26151e-13	Up	--	THD25679.1 Zinc finger protein [Fasciola hepatica]
SMESG000025706.1	1.36697	0.000767919	0.00319505	Up	--	-
SMESG000025870.1	-1.09482	9.23584e-32	3.91321e-30	Down	SLC2A4RG	CRL08173.1 CLUMA_CG021018, isoform A [Clunio marinus]
SMESG000025889.1	-2.49735	1.72565e-35	8.73253e-34	Down	--	-
SMESG000026036.1	-1.71901	1.14658e-53	1.18987e-51	Down	SNZERR	ELU04699.1 hypothetical protein CAPTEDRAFT_222963 [Capitella teleta]
SMESG000026168.1	-0.852636	2.05725e-05	0.000118321	Down	--	QFQ66893.1 hypothetical protein [Schmidtea mediterranea]
SMESG000026221.1	-1.62873	5.09899e-36	2.67482e-34	Down	kynU	XP_028662344.1 kynureninase [Erpetoichthys calabaricus]
SMESG000026283.1	1.0912	4.74717e-23	1.30991e-21	Up	tcaf	XP_009061190.1 hypothetical protein LOTGIDRAFT_126693 [Lottia gigantea]
SMESG000026385.1	0.830563	0.0377417	0.0929171	Up	TWIST2	ADC32288.1 twist [Schmidtea polychroa]
SMESG000026402.1	1.27744	9.16756e-13	1.27465e-11	Up	gld-2	TGZ72774.1 hypothetical protein CRM22_001906 [Opisthorchis felineus]
SMESG000026514.1	-1.41313	5.77629e-123	3.93916e-120	Down	pps	PAA89199.1 hypothetical protein BOX15_Mlig003482g1 [Macrostomum lignano]
SMESG000026518.1	-0.903074	6.77679e-22	1.76455e-20	Down	--	AKN21496.1 slc16a-1, partial [Schmidtea mediterranea]
SMESG000026561.1	-1.28502	9.12257e-18	1.79951e-16	Down	CLN8	XP_022300210.1 protein CLN8-like [Crassostrea virginica]
SMESG000026848.1	-1.36074	1.66358e-42	1.18528e-40	Down	--	-
SMESG000026849.1	-0.962115	2.26619e-36	1.21097e-34	Down	EHD3	XP_025106103.1 EH domain-containing protein 3-like [Pomacea canaliculata]
SMESG000027124.1	-1.8928	6.09109e-18	1.21153e-16	Down	--	XP_026732213.1 uncharacterized protein LOC113496989 [Trichoplusia ni]
SMESG000027140.1	-2.3068	3.18352e-13	4.59588e-12	Down	--	-
SMESG000027142.1	-2.10447	3.79414e-10	4.11948e-09	Down	--	-
SMESG000027204.1	-0.817412	4.27471e-36	2.25897e-34	Down	acsbg2	XP_017307774.1 PREDICTED: long-chain-fatty-acid--CoA ligase ACSBG2-like [Ictalurus punctatus]
SMESG000027225.1	-1.78335	8.46983e-16	1.4667e-14	Down	TF	AFJ24848.1 transferrin-1 [Schmidtea mediterranea]
SMESG000027230.1	0.916125	0.0234325	0.0629363	Up	CCAP-R	TNN21179.1 Mesotocin receptor isoform 2 [Schistosoma japonicum]
SMESG000027283.1	-0.949088	1.83498e-18	3.74875e-17	Down	--	AFJ24792.1 TNF receptor associated factor-2, partial [Schmidtea mediterranea]
SMESG000027326.1	-0.809535	0.00973098	0.0298922	Down	--	-
SMESG000027389.1	-2.27903	5.15965e-61	6.77903e-59	Down	CLN5	XP_009059770.1 hypothetical protein LOTGIDRAFT_125348 [Lottia gigantea]
SMESG000027404.1	-2.50701	4.25895e-31	1.7679e-29	Down	--	-
SMESG000027530.1	0.924027	7.60444e-07	5.48354e-06	Up	SPEC3	XP_021341520.1 uncharacterized protein LOC110442313 [Mizuhopecten yessoensis]
SMESG000027728.1	-0.873355	6.9677e-07	5.06263e-06	Down	--	-
SMESG000027798.1	0.999252	1.96754e-20	4.6041e-19	Up	pim2	AVM18989.1 PIM-1 [Schmidtea mediterranea]
SMESG000027903.1	-2.66152	3.79076e-38	2.16285e-36	Down	slc39a1	AKN21668.1 slc39a-3 [Schmidtea mediterranea]
SMESG000027907.1	-1.82123	1.57649e-11	1.9564e-10	Down	Plb1	PAA84188.1 hypothetical protein BOX15_Mlig030000g3 [Macrostomum lignano]
SMESG000027979.1	-1.73565	3.0274e-140	2.89036e-137	Down	--	AFJ24740.1 hypothetical protein [Schmidtea mediterranea]
SMESG000028039.1	-1.66587	2.25787e-101	9.23854e-99	Down	--	-
SMESG000028186.1	-1.12253	4.17747e-44	3.14871e-42	Down	--	-
SMESG000028209.1	-0.914426	0.000152247	0.000743886	Down	--	-
SMESG000028261.1	1.48686	4.06477e-19	8.7143e-18	Up	--	ADW66116.1 lectin-like protein, partial [Schmidtea mediterranea]
SMESG000028264.1	2.86478	6.108e-54	6.47946e-52	Up	--	ADW66116.1 lectin-like protein, partial [Schmidtea mediterranea]
SMESG000028419.1	-0.957178	9.14616e-10	9.44356e-09	Down	imt1	PAA52406.1 hypothetical protein BOX15_Mlig010228g2 [Macrostomum lignano]
SMESG000028420.1	-2.30945	1.20292e-151	1.43559e-148	Down	--	-
SMESG000028470.1	-0.961749	3.7109e-10	4.03323e-09	Down	NUDT16	XP_013062792.1 PREDICTED: U8 snoRNA-decapping enzyme-like isoform X3 [Biomphalaria glabrata]
SMESG000028475.1	-1.55166	4.63129e-84	1.16359e-81	Down	SLCO1B3	AKN21547.1 slc21a-2 [Schmidtea mediterranea]
SMESG000028714.1	-1.22333	6.27321e-41	4.14003e-39	Down	acp7	QGW52015.1 acid phosphatase type 7A [Dugesia japonica]
SMESG000028980.1	-0.982941	3.98858e-12	5.21648e-11	Down	SLC47A1	AKN21704.1 slc47a-7 [Schmidtea mediterranea]
SMESG000029023.1	-1.50042	1.30176e-21	3.31718e-20	Down	TDH	XP_002008271.1 L-threonine 3-dehydrogenase, mitochondrial [Drosophila mojavensis]
SMESG000029046.1	-2.13051	1.40148e-80	3.08778e-78	Down	TMEM144	XP_026696612.1 transmembrane protein 144 isoform X1 [Ciona intestinalis]
SMESG000029089.1	-2.85891	1.97447e-49	1.77839e-47	Down	--	-
SMESG000029095.1	-1.28359	1.20028e-05	7.15325e-05	Down	--	-
SMESG000029096.1	-2.04238	2.1452e-136	1.92009e-133	Down	--	AFJ24856.1 retinoblastoma binding protein-1 [Schmidtea mediterranea]
SMESG000029138.1	-1.47072	6.81787e-05	0.000356476	Down	TMT1	XP_022096077.1 putative methyltransferase DDB_G0268948 isoform X3 [Acanthaster planci]
SMESG000029269.1	-1.5632	9.27986e-05	0.000472774	Down	slc20a1b	AKN21545.1 slc20a-2 [Schmidtea mediterranea]
SMESG000029291.1	-1.06014	1.48097e-18	3.04727e-17	Down	--	PAA66905.1 hypothetical protein BOX15_Mlig002220g2 [Macrostomum lignano]
SMESG000029294.1	-0.829102	3.45482e-46	2.79528e-44	Down	pol	PAA92840.1 hypothetical protein BOX15_Mlig002220g3 [Macrostomum lignano]
SMESG000029404.1	-1.31269	1.28491e-39	8.00055e-38	Down	MAOB	XP_013070480.1 PREDICTED: probable flavin-containing monoamine oxidase A [Biomphalaria glabrata]
SMESG000029574.1	2.86418	1.31778e-27	4.46145e-26	Up	--	-
SMESG000029581.1	2.35612	1.58624e-38	9.19697e-37	Up	--	-
SMESG000029589.1	-1.6493	7.07433e-07	5.13229e-06	Down	--	-
SMESG000029594.1	-1.31798	8.67011e-30	3.27611e-28	Down	--	-
SMESG000029602.1	-2.40885	3.37624e-08	2.92506e-07	Down	--	AFJ24802.1 hypothetical protein, partial [Schmidtea mediterranea]
SMESG000029612.1	-2.3055	4.85567e-115	2.75697e-112	Down	--	KAF2348572.1 Integrase catalytic core [Trinorchestia longiramus]
SMESG000029734.1	-1.06818	3.24052e-07	2.45542e-06	Down	--	-
SMESG000029772.1	-0.801032	0.000121669	0.000604167	Down	--	-
SMESG000029906.1	-2.60706	1.92206e-77	3.62182e-75	Down	--	PAA57824.1 hypothetical protein BOX15_Mlig031394g1, partial [Macrostomum lignano]
SMESG000030111.1	-1.13017	0.00234414	0.0086544	Down	slc24a5	AKN21566.1 slc24a-6, partial [Schmidtea mediterranea]
SMESG000030115.1	-3.83763	1.72469e-45	1.37218e-43	Down	SLC24A5	AKN21568.1 slc24a-8 [Schmidtea mediterranea]
SMESG000030274.1	-0.854855	0.00442325	0.0150858	Down	--	-
SMESG000030276.1	-0.952553	0.0163276	0.0467282	Down	--	-
SMESG000030353.1	-0.909015	1.24799e-11	1.55819e-10	Down	--	XP_013419244.1 endoglycoceramidase [Lingula anatina]
SMESG000030357.1	-1.08789	6.13953e-06	3.84284e-05	Down	--	XP_013419244.1 endoglycoceramidase [Lingula anatina]
SMESG000030369.1	-1.3026	4.74723e-10	5.0811e-09	Down	--	XP_013419244.1 endoglycoceramidase [Lingula anatina]
SMESG000030467.1	-0.89907	1.94834e-05	0.000112418	Down	--	-
SMESG000030475.1	1.13455	3.49556e-36	1.85407e-34	Up	--	-
SMESG000030739.1	0.94692	0.000221313	0.00104429	Up	--	-
SMESG000030835.1	-1.3056	2.71098e-06	1.79657e-05	Down	slc15a4	AKN21492.1 slc15a-6 [Schmidtea mediterranea]
SMESG000030911.1	-1.1566	4.01468e-13	5.77252e-12	Down	--	-
SMESG000030918.1	0.80246	9.79637e-13	1.35944e-11	Up	Best3	CDS26236.1 bestrophin 2 [Hymenolepis microstoma]
SMESG000030921.1	0.914984	3.0424e-14	4.73075e-13	Up	--	-
SMESG000030981.1	-3.69273	3.13733e-38	1.79719e-36	Down	--	AEN71564.1 ferritin 3 [Argopecten irradians]
SMESG000031046.1	-2.02301	7.86155e-35	3.8425e-33	Down	--	XP_007906270.1 PREDICTED: stimulated by retinoic acid gene 6 protein homolog [Callorhinchus milii]
SMESG000031097.1	1.27665	6.62063e-11	7.70846e-10	Up	ctbp-1	OZG24668.1 hypothetical protein FL83_00450, partial [Caenorhabditis latens]
SMESG000031101.1	-1.15391	1.08201e-11	1.36164e-10	Down	--	XP_019925026.1 PREDICTED: uncharacterized protein LOC105333658 [Crassostrea gigas]
SMESG000031104.1	-0.986561	8.54607e-40	5.41541e-38	Down	--	XP_022796263.1 dual serine/threonine and tyrosine protein kinase-like [Stylophora pistillata]
SMESG000031125.1	-2.55914	3.7982e-106	1.75465e-103	Down	MJ1319	AKN21444.1 slc6a-24 [Schmidtea mediterranea]
SMESG000031127.1	-1.29541	9.03263e-15	1.44856e-13	Down	HI_0736	AKN21444.1 slc6a-24 [Schmidtea mediterranea]
SMESG000031290.1	0.848177	4.09848e-10	4.42976e-09	Up	--	AHD24720.1 X1.A2.3 [Schmidtea mediterranea]
SMESG000031543.1	-1.50738	7.51892e-08	6.17422e-07	Down	Crispld2	XP_019925963.1 PREDICTED: TPR repeat-containing protein DDB_G0287407-like [Crassostrea gigas]
SMESG000031561.1	-1.61953	2.5664e-14	4.01677e-13	Down	nAChRbeta1	PAA52239.1 hypothetical protein BOX15_Mlig019166g1 [Macrostomum lignano]
SMESG000031677.1	-0.925177	2.33153e-21	5.86817e-20	Down	--	PAA93900.1 hypothetical protein BOX15_Mlig034563g1 [Macrostomum lignano]
SMESG000031786.1	-0.960676	1.09338e-26	3.56682e-25	Down	--	XP_013385262.1 cation-dependent mannose-6-phosphate receptor [Lingula anatina]
SMESG000031795.1	0.849584	7.46938e-08	6.13707e-07	Up	--	-
SMESG000031796.1	0.822573	1.13593e-19	2.52997e-18	Up	--	-
SMESG000031800.1	1.02747	6.3992e-08	5.30648e-07	Up	--	XP_029982425.1 NPC intracellular cholesterol transporter 2 [Sphaeramia orbicularis]
SMESG000031874.1	1.92694	1.81517e-75	3.24937e-73	Up	PTPRB	KPM09442.1 tyrosine-protein phosphatase 10D-like protein [Sarcoptes scabiei]
SMESG000031930.1	2.6084	0	0	Up	mib1	XP_007070246.1 LOW QUALITY PROTEIN: E3 ubiquitin-protein ligase MIB2 [Chelonia mydas]
SMESG000031949.1	-1.24441	7.04538e-09	6.62923e-08	Down	--	-
SMESG000031950.1	-1.93128	5.14338e-10	5.49279e-09	Down	--	-
SMESG000031958.1	-0.936589	2.70816e-27	9.12553e-26	Down	--	AFJ24833.1 IAP domain containing-1, partial [Schmidtea mediterranea]
SMESG000032045.1	0.955459	1.23321e-36	6.66448e-35	Up	Ptpn13	XP_031756171.1 tenascin-X-like isoform X8 [Xenopus tropicalis]
SMESG000032312.1	1.22478	0.00112197	0.00450879	Up	HSL1	AVM18990.1 PIM-1-like protein [Schmidtea mediterranea]
SMESG000032323.1	1.27684	3.24295e-42	2.2878e-40	Up	--	-
SMESG000032396.1	-2.67175	2.76918e-243	1.32191e-239	Down	UROC1	RWS03308.1 urocanate hydratase-like isoform X1 [Dinothrombium tinctorium]
SMESG000032456.1	1.02565	3.10683e-16	5.52707e-15	Up	--	-
SMESG000032457.1	-0.865043	4.94764e-24	1.43142e-22	Down	SERPINB3	XP_017384265.1 PREDICTED: serpin B3 isoform X1 [Cebus capucinus imitator]
SMESG000032489.1	-0.81054	4.57835e-44	3.43281e-42	Down	RBM47	TGZ68491.1 hypothetical protein CRM22_004239 [Opisthorchis felineus]
SMESG000032510.1	0.967352	0.000625412	0.00267279	Up	-	-
SMESG000032522.1	-1.78998	9.05636e-08	7.37329e-07	Down	--	XP_013091464.1 PREDICTED: uncharacterized protein LOC106075092 [Biomphalaria glabrata]
SMESG000032525.1	-1.63528	3.26169e-23	9.08769e-22	Down	--	-
SMESG000032684.1	1.27295	0.000368604	0.0016705	Up	Poln	XP_019631984.1 PREDICTED: uncharacterized protein LOC109475667 isoform X1 [Branchiostoma belcheri]
SMESG000032703.1	-1.23959	1.5506e-23	4.38858e-22	Down	DDB_G0284251	AKN21681.1 slc42a-1 [Schmidtea mediterranea]
SMESG000032769.1	1.11573	1.35965e-05	8.02952e-05	Up	--	-
SMESG000032891.1	-0.830519	9.39641e-26	2.95749e-24	Down	ABCA1	XP_013414368.2 LOW QUALITY PROTEIN: ATP-binding cassette sub-family A member 1-like [Lingula anatina]
SMESG000033033.1	-1.42104	6.78619e-30	2.5916e-28	Down	--	TNN18903.1 Lipopolysaccharide-induced tumor necrosis factor-alpha factor isoform 1 [Schistosoma japonicum]
SMESG000033070.1	0.815926	2.31272e-09	2.29367e-08	Up	--	THD28376.1 Anosmin-1 [Fasciola hepatica]
SMESG000033217.1	-0.849719	3.60464e-08	3.11352e-07	Down	zgc:153146	PAA59339.1 hypothetical protein BOX15_Mlig016035g2 [Macrostomum lignano]
SMESG000033280.1	1.02073	5.72681e-27	1.90287e-25	Up	PLXND1	AJA72714.1 plexin B-4, partial [Schmidtea mediterranea]
SMESG000033300.1	0.985646	3.38127e-12	4.46708e-11	Up	--	AJA72715.1 plexin B-5, partial [Schmidtea mediterranea]
SMESG000033328.1	1.27564	2.55067e-54	2.74648e-52	Up	PLXNB2	AJA72714.1 plexin B-4, partial [Schmidtea mediterranea]
SMESG000033381.1	1.65113	4.76814e-14	7.30316e-13	Up	PKD2	AKN21728.1 PKD2-2 [Schmidtea mediterranea]
SMESG000033386.1	-2.02745	2.16772e-28	7.74162e-27	Down	--	-
SMESG000033459.1	1.26172	0.00045811	0.00202612	Up	--	XP_022783149.1 uncharacterized protein CXorf65 homolog [Stylophora pistillata]
SMESG000033462.1	1.42982	3.06637e-06	2.01715e-05	Up	--	-
SMESG000033473.1	-0.807741	0.000188051	0.000899491	Down	--	-
SMESG000033518.1	-1.98385	1.21099e-20	2.89526e-19	Down	Trhde	AFJ24858.1 hypothetical protein, partial [Schmidtea mediterranea]
SMESG000033571.1	-0.822965	2.72824e-10	3.0101e-09	Down	RICTOR	AFH08797.1 rictor, partial [Schmidtea mediterranea]
SMESG000033605.1	-0.885043	8.77695e-15	1.40913e-13	Down	Slc31a1	AKN21632.1 slc31a-2 [Schmidtea mediterranea]
SMESG000033615.1	-1.18371	4.09025e-11	4.88137e-10	Down	--	RMX35982.1 hypothetical protein pdam_00005184 [Pocillopora damicornis]
SMESG000033621.1	-0.833641	0.016395	0.0468555	Down	--	-
SMESG000033650.1	-1.41475	3.98348e-22	1.05643e-20	Down	CYP46A1	TRZ24407.1 hypothetical protein HGM15179_002614 [Zosterops borbonicus]
SMESG000033682.1	0.885376	0.0336153	0.0845162	Up	--	-
SMESG000033796.1	0.977208	1.79596e-23	5.07297e-22	Up	--	XP_009025398.1 hypothetical protein HELRODRAFT_163206 [Helobdella robusta]
SMESG000033958.1	-5.63599	1.04089e-30	4.12923e-29	Down	--	XP_029185063.1 hercynylcysteine sulfoxide lyase-like [Acropora millepora]
SMESG000034030.1	-1.51595	5.51296e-97	2.07766e-94	Down	DPYD	XP_022315388.1 dihydropyrimidine dehydrogenase [NADP(+)]-like [Crassostrea virginica]
SMESG000034294.1	1.85149	1.02856e-19	2.29798e-18	Up	Cp1	VDL99111.1 unnamed protein product [Schistocephalus solidus]
SMESG000034497.1	0.838952	1.31985e-12	1.80531e-11	Up	RCN1	KAA0194773.1 Calumenin-B [Fasciolopsis buski]
SMESG000034791.1	-1.09885	2.89028e-46	2.36524e-44	Down	FAAH	OCT82705.1 hypothetical protein XELAEV_18025235mg [Xenopus laevis]
SMESG000034829.1	-2.72497	4.51154e-153	5.87362e-150	Down	--	-
SMESG000034972.1	-0.984323	0.00469934	0.0159363	Down	--	-
SMESG000035036.1	-1.43786	9.61374e-18	1.89119e-16	Down	--	QFQ66892.1 hypothetical protein [Schmidtea mediterranea]
SMESG000035037.1	-1.64096	1.49339e-10	1.68799e-09	Down	--	QFQ66892.1 hypothetical protein [Schmidtea mediterranea]
SMESG000035040.1	-1.45493	1.19478e-21	3.0609e-20	Down	--	QFQ66892.1 hypothetical protein [Schmidtea mediterranea]
SMESG000035077.1	0.91199	6.56991e-20	1.49109e-18	Up	--	XP_028408236.1 uncharacterized protein LOC114530821 [Dendronephthya gigantea]
SMESG000035181.1	-1.2531	2.16837e-40	1.39879e-38	Down	IDH1	XP_013407452.1 isocitrate dehydrogenase [NADP] cytoplasmic [Lingula anatina]
SMESG000035238.1	-1.05789	2.77882e-22	7.45234e-21	Down	--	-
SMESG000035344.1	-0.879262	8.05081e-41	5.28879e-39	Down	AAEL006169	XP_011865870.1 PREDICTED: lysosomal aspartic protease [Vollenhovia emeryi]
SMESG000035381.1	1.52389	2.5779e-57	3.07651e-55	Up	DUSP10	BAK52368.1 mitogen-activated protein kinase phosphatase [Dugesia japonica]
SMESG000035386.1	-0.886067	8.26705e-08	6.76141e-07	Down	--	-
SMESG000035413.1	0.985526	0.00326947	0.0116213	Up	--	-
SMESG000035432.1	0.989482	1.28435e-07	1.02241e-06	Up	--	-
SMESG000035442.1	0.871785	0.000357629	0.00162642	Up	--	-
SMESG000035446.1	0.937685	5.92841e-37	3.24049e-35	Up	--	XP_020612171.1 TNF receptor-associated factor 5-like [Orbicella faveolata]
SMESG000035449.1	1.43713	3.02842e-08	2.64936e-07	Up	--	-
SMESG000035450.1	0.803526	6.03902e-08	5.02527e-07	Up	--	-
SMESG000035463.1	-1.0484	0.00581403	0.0191408	Down	ELOVL4	XP_009051096.1 hypothetical protein LOTGIDRAFT_214031 [Lottia gigantea]
SMESG000035551.1	-0.87411	1.5089e-10	1.70417e-09	Down	--	-
SMESG000035782.1	-0.828954	1.74075e-05	0.000101504	Down	--	-
SMESG000035804.1	-0.810112	6.67986e-19	1.41722e-17	Down	tubb4	XP_001192875.1 tubulin beta chain [Strongylocentrotus purpuratus]
SMESG000035904.1	1.71227	3.1643e-31	1.31732e-29	Up	--	AFJ24813.1 GRB2 associated binding protein-1 [Schmidtea mediterranea]
SMESG000035938.1	-1.0132	6.7129e-15	1.08505e-13	Down	--	-
SMESG000035953.1	-1.95396	6.06341e-45	4.71924e-43	Down	Slc26a6	AKN21605.1 slc26a-1 [Schmidtea mediterranea]
SMESG000036036.1	-4.07754	2.46725e-30	9.62765e-29	Down	--	KAA0191751.1 Gynecophoral canal protein [Fasciolopsis buski]
SMESG000036037.1	-3.95204	4.62063e-20	1.05706e-18	Down	--	VDK87667.1 unnamed protein product [Dibothriocephalus latus]
SMESG000036210.1	0.971963	9.97337e-53	9.85025e-51	Up	NAV2	XP_009064461.1 hypothetical protein LOTGIDRAFT_131500, partial [Lottia gigantea]
SMESG000036223.1	1.49255	5.55275e-14	8.46869e-13	Up	--	-
SMESG000036361.1	0.815179	0.000425517	0.00190135	Up	ZNF217	CDS40983.1 zinc finger protein 333 [Echinococcus multilocularis]
SMESG000036408.1	-2.28996	3.78454e-15	6.22971e-14	Down	--	-
SMESG000036533.1	-1.09836	8.52306e-39	5.08578e-37	Down	DBI	XP_021948487.1 acyl-CoA-binding protein-like [Folsomia candida]
SMESG000036870.1	-1.41485	1.91579e-16	3.46415e-15	Down	--	-
SMESG000036895.1	-1.42606	1.22411e-29	4.60118e-28	Down	RIDA	XP_002710629.2 PREDICTED: ribonuclease UK114 [Oryctolagus cuniculus]
SMESG000036926.1	-1.28456	1.54635e-19	3.41748e-18	Down	--	-
SMESG000036932.1	-2.5991	9.48883e-96	3.23546e-93	Down	--	-
SMESG000037098.1	0.814904	3.0243e-30	1.17374e-28	Up	PLPPR5	XP_009047876.1 hypothetical protein LOTGIDRAFT_157415 [Lottia gigantea]
SMESG000037302.1	-0.809889	0.00459073	0.0155865	Down	GALK1	XP_019616678.1 PREDICTED: galactokinase-like [Branchiostoma belcheri]
SMESG000037362.1	-1.99096	2.93937e-44	2.25105e-42	Down	pm20d2	XP_014771841.1 PREDICTED: peptidase M20 domain-containing protein 2-like [Octopus bimaculoides]
SMESG000037369.1	-0.837502	0.00701172	0.0224742	Down	--	VDL19351.1 unnamed protein product [Hymenolepis diminuta]
SMESG000037418.1	-4.24989	1.52069e-24	4.50885e-23	Down	--	-
SMESG000037481.1	1.25387	2.50984e-30	9.76723e-29	Up	ak2	XP_005099746.1 PREDICTED: adenylate kinase-like [Aplysia californica]
SMESG000037532.1	-2.65212	1.14144e-35	5.83807e-34	Down	SAT2	XP_031555174.1 diamine acetyltransferase 2-like [Actinia tenebrosa]
SMESG000037573.1	-1.84972	1.40384e-33	6.57005e-32	Down	--	-
SMESG000037645.1	-0.852012	5.14022e-05	0.000275395	Down	--	KAA3672323.1 uncharacterized protein DEA37_0001980 [Paragonimus westermani]
SMESG000037658.1	-2.11591	5.82905e-29	2.12954e-27	Down	--	-
SMESG000037719.1	-1.00742	8.08647e-28	2.76387e-26	Down	Gnmt	RVE67650.1 hypothetical protein OJAV_G00104970 [Oryzias javanicus]
SMESG000037740.1	-1.32256	4.48565e-22	1.18086e-20	Down	PLA2G15	XP_009173508.1 hypothetical protein T265_09225 [Opisthorchis viverrini]
SMESG000037749.1	-1.11936	4.31009e-31	1.78395e-29	Down	--	-
SMESG000037790.1	1.40387	1.08714e-15	1.86677e-14	Up	--	-
SMESG000037948.1	0.814955	1.13052e-30	4.47241e-29	Up	--	-
SMESG000037965.1	1.41074	1.60021e-06	1.09806e-05	Up	ZNF488	ELT97137.1 hypothetical protein CAPTEDRAFT_221467 [Capitella teleta]
SMESG000037971.1	1.13629	1.37092e-58	1.70722e-56	Up	sn	PAA92187.1 hypothetical protein BOX15_Mlig023083g2 [Macrostomum lignano]
SMESG000037977.1	-2.84245	2.65261e-14	4.14716e-13	Down	apolpp	PAA80758.1 hypothetical protein BOX15_Mlig027085g4 [Macrostomum lignano]
SMESG000037978.1	-2.44867	4.59033e-20	1.05181e-18	Down	apolpp	AYP74774.1 apolipophorin 2A [Sepioteuthis lessoniana]
SMESG000037991.1	2.0629	1.96654e-09	1.96393e-08	Up	EPPIN	XP_004923339.1 trypsin inhibitor-like [Bombyx mori]
SMESG000038209.1	0.946104	0.000637354	0.00271734	Up	-	-
SMESG000038313.1	1.08728	1.63041e-09	1.64084e-08	Up	--	AFJ24776.1 hypothetical protein [Schmidtea mediterranea]
SMESG000038673.1	-2.74786	1.79643e-44	1.38316e-42	Down	--	-
SMESG000038687.1	-2.88012	5.91497e-77	1.10011e-74	Down	--	-
SMESG000038746.1	-1.25932	2.97804e-23	8.31354e-22	Down	Mgll	XP_029974387.1 monoglyceride lipase isoform X1 [Salarias fasciatus]
SMESG000038860.1	0.953052	6.97532e-24	1.99388e-22	Up	DHX8	XP_023237754.1 ATP-dependent RNA helicase DHX8-like isoform X1 [Centruroides sculpturatus]
SMESG000039062.1	-1.65632	3.69886e-73	6.30611e-71	Down	--	XP_020908007.1 TNF receptor-associated factor 6 [Exaiptasia pallida]
SMESG000039145.1	1.01829	0.0155858	0.0448786	Up	--	-
SMESG000039287.1	-0.852947	0.0204922	0.0562415	Down	Etnk2	XP_023719891.1 ethanolamine kinase [Cryptotermes secundus]
SMESG000039339.1	1.48217	1.49198e-09	1.50788e-08	Up	Trpv6	XP_022322068.1 transient receptor potential cation channel subfamily V member 5-like isoform X10 [Crassostrea virginica]
SMESG000039559.1	-0.913264	7.44165e-06	4.58176e-05	Down	gata4	AFF18488.1 GATA456 [Schmidtea mediterranea]
SMESG000039696.1	-1.07667	5.16156e-45	4.03928e-43	Down	Coprox	THD24889.1 Oxygen-dependent coproporphyrinogen-III oxidase [Fasciola hepatica]
SMESG000039746.1	-1.44683	9.92941e-18	1.94793e-16	Down	fax	PAA48108.1 hypothetical protein BOX15_Mlig003243g1 [Macrostomum lignano]
SMESG000039774.1	-1.2885	9.64572e-31	3.85856e-29	Down	mfsd8	RNA24089.1 Major facilitator superfamily domain-containing 8 [Brachionus plicatilis]
SMESG000039812.1	1.18049	1.44518e-62	2.04915e-60	Up	ATP7A	XP_013413564.1 copper-transporting ATPase 1-like isoform X2 [Lingula anatina]
SMESG000039911.1	-2.59264	7.12631e-21	1.73421e-19	Down	ABCC1	PAA88602.1 hypothetical protein BOX15_Mlig016190g1 [Macrostomum lignano]
SMESG000039950.1	-1.01753	6.34037e-29	2.31044e-27	Down	Tep1	RDD37418.1 Telomerase protein component 1 [Trichoplax sp. H2]
SMESG000039981.1	-2.04221	4.63704e-30	1.78995e-28	Down	Usp16	XP_023716130.1 ubiquitin carboxyl-terminal hydrolase 30 homolog isoform X1 [Cryptotermes secundus]
SMESG000040010.1	-2.21022	2.54687e-74	4.50293e-72	Down	--	-
SMESG000040015.1	-1.73811	6.32919e-55	6.97233e-53	Down	--	-
SMESG000040016.1	-1.00554	2.16666e-06	1.46017e-05	Down	--	-
SMESG000040021.1	-1.7205	6.88669e-21	1.68014e-19	Down	--	-
SMESG000040150.1	1.10162	0.000130038	0.000641943	Up	CACNG7	VZI15939.1 unnamed protein product [Sparganum proliferum]
SMESG000040206.1	-3.44955	5.88032e-19	1.25129e-17	Down	--	-
SMESG000040241.1	-0.901595	0.00379963	0.0132345	Down	--	-
SMESG000040291.1	-3.94122	1.97188e-25	6.11239e-24	Down	--	-
SMESG000040350.1	-0.84649	0.0241738	0.0644972	Down	--	-
SMESG000040908.1	-1.16158	5.08309e-18	1.01669e-16	Down	--	-
SMESG000040922.1	-2.33065	6.40682e-22	1.67126e-20	Down	--	-
SMESG000040931.1	-1.40965	1.95991e-18	3.99827e-17	Down	--	-
SMESG000040945.1	-1.07495	5.66859e-13	8.02966e-12	Down	--	-
SMESG000040959.1	-2.61635	9.62998e-19	2.01036e-17	Down	--	-
SMESG000041022.1	-2.31443	2.29e-30	8.96042e-29	Down	--	-
SMESG000041045.1	-1.25941	2.71512e-27	9.12751e-26	Down	Odc1	RUS88763.1 hypothetical protein EGW08_003480 [Elysia chlorotica]
SMESG000041207.1	0.810108	0.00424401	0.0145333	Up	imt1	PAA52406.1 hypothetical protein BOX15_Mlig010228g2 [Macrostomum lignano]
SMESG000041220.1	-1.07373	2.02587e-06	1.37304e-05	Down	--	-
SMESG000041287.1	-0.908452	0.0167258	0.047592	Down	IDNK	XP_003286016.1 hypothetical protein DICPUDRAFT_76935 [Dictyostelium purpureum]
SMESG000041329.1	-2.7973	9.03702e-42	6.25213e-40	Down	--	-
SMESG000041335.1	-1.52946	2.0856e-29	7.79841e-28	Down	Slc13a1	AKN21484.1 slc13a-5 [Schmidtea mediterranea]
SMESG000041422.1	-1.67114	7.81284e-17	1.44371e-15	Down	--	-
SMESG000041433.1	-2.25831	5.1027e-09	4.87822e-08	Down	--	-
SMESG000041448.1	2.16055	3.03724e-24	8.8768e-23	Up	--	AFJ24815.1 low density lipoprotein receptor related-2, partial [Schmidtea mediterranea]
SMESG000041571.1	0.876349	0.00154001	0.0059898	Up	slou	XP_031549621.1 NK1 transcription factor-related protein 1-like isoform X2 [Actinia tenebrosa]
SMESG000041756.1	-1.26101	1.51089e-16	2.75989e-15	Down	--	-
SMESG000042091.1	-0.892403	6.09464e-15	9.91834e-14	Down	Slc6a7	AKN21425.1 slc6a-5 [Schmidtea mediterranea]
SMESG000042095.1	1.372	2.93087e-10	3.21386e-09	Up	seb-2	XP_014781135.1 PREDICTED: calcitonin gene-related peptide type 1 receptor-like [Octopus bimaculoides]
SMESG000042102.1	0.825082	0.000118405	0.000589596	Up	--	PAA77042.1 hypothetical protein BOX15_Mlig001380g4 [Macrostomum lignano]
SMESG000042103.1	-1.44711	6.65389e-29	2.41854e-27	Down	frrs1	CDS37614.1 ferric chelate reductase [Echinococcus multilocularis]
SMESG000042199.1	1.11422	2.72837e-06	1.80726e-05	Up	--	-
SMESG000042203.1	0.999939	1.04736e-38	6.19801e-37	Up	slc15a2	AKN21489.1 slc15a-3 [Schmidtea mediterranea]
SMESG000042369.1	-1.12078	1.33444e-05	7.8969e-05	Down	--	-
SMESG000042400.1	0.844751	0.000105936	0.000532319	Up	--	TPP63302.1 Globin X [Fasciola gigantica]
SMESG000042513.1	-0.965078	1.86903e-20	4.39514e-19	Down	Slc15a4	AKN21491.1 slc15a-5 [Schmidtea mediterranea]
SMESG000042514.1	-0.892691	0.00115918	0.00463673	Down	--	XP_031554620.1 uncharacterized protein LOC116291586 [Actinia tenebrosa]
SMESG000042605.1	-0.838784	2.46308e-11	3.00202e-10	Down	Rab10	TKR96449.1 hypothetical protein L596_010464 [Steinernema carpocapsae]
SMESG000042765.1	-1.7323	2.50838e-60	3.26569e-58	Down	--	-
SMESG000042787.1	-1.18856	4.21228e-46	3.389e-44	Down	--	-
SMESG000042952.1	-2.31274	8.18552e-23	2.24569e-21	Down	--	-
SMESG000043010.1	1.16783	0.00533129	0.0177515	Up	--	PAA84795.1 hypothetical protein BOX15_Mlig012932g3 [Macrostomum lignano]
SMESG000043134.1	1.27712	4.28647e-11	5.10278e-10	Up	unc-9	AFJ24866.1 innexin-1 [Schmidtea mediterranea]
SMESG000043142.1	-1.44595	1.00241e-40	6.52526e-39	Down	gatm	VDL99016.1 unnamed protein product [Schistocephalus solidus]
SMESG000043173.1	-1.37628	1.1876e-41	8.17673e-40	Down	Agmo	PAA70495.1 hypothetical protein BOX15_Mlig009958g1 [Macrostomum lignano]
SMESG000043277.1	-2.07621	6.60652e-94	2.10249e-91	Down	--	-
SMESG000043278.1	-2.03778	1.16571e-22	3.17984e-21	Down	--	-
SMESG000043280.1	-0.949473	8.31475e-30	3.15015e-28	Down	--	-
SMESG000043310.1	-0.973682	3.59406e-05	0.000198269	Down	--	-
SMESG000043321.1	-1.6994	1.68974e-14	2.6739e-13	Down	--	AHD24730.1 X1.C4.1 [Schmidtea mediterranea]
SMESG000043329.1	-0.809165	2.12899e-06	1.43682e-05	Down	--	-
SMESG000043362.1	0.971941	0.0104769	0.031903	Up	--	AHD24730.1 X1.C4.1 [Schmidtea mediterranea]
SMESG000043368.1	-0.984089	3.02443e-07	2.3051e-06	Down	--	-
SMESG000043382.1	-0.855957	0.00109329	0.00440547	Down	dlcB	KYQ92041.1 cytoplasmic dynein light chain [Tieghemostelium lacteum]
SMESG000043394.1	0.98746	0.0056245	0.0186325	Up	--	ANO39010.1 GCR030 [Schmidtea mediterranea]
SMESG000043420.1	1.07603	1.07655e-12	1.48959e-11	Up	--	-
SMESG000043528.1	-1.31022	8.5073e-33	3.83123e-31	Down	SULT1C4	THD23764.1 Aryl sulfotransferase [Fasciola hepatica]
SMESG000043575.1	1.3434	1.92524e-24	5.67313e-23	Up	unc-7	AFD29613.1 INX-13 [Schmidtea mediterranea]
SMESG000043601.1	-0.854118	9.63905e-20	2.15689e-18	Down	rer-1	XP_002160025.1 PREDICTED: protein RER1-like [Hydra vulgaris]
SMESG000043630.1	-0.847786	5.16012e-48	4.42503e-46	Down	ACSS3	PAA53974.1 hypothetical protein BOX15_Mlig003121g5, partial [Macrostomum lignano]
SMESG000043633.1	-1.21618	1.00257e-09	1.02997e-08	Down	--	-
SMESG000043653.1	-1.41276	5.29893e-19	1.12926e-17	Down	acsA	XP_028410533.1 acyl-CoA synthetase short-chain family member 3, mitochondrial-like isoform X2 [Dendronephthya gigantea]
SMESG000043655.1	-1.49237	2.49195e-15	4.16421e-14	Down	Acss3	XP_020659649.1 acyl-CoA synthetase short-chain family member 3, mitochondrial-like isoform X1 [Pogona vitticeps]
SMESG000043866.1	-1.35437	1.35913e-12	1.85726e-11	Down	--	AHD24730.1 X1.C4.1 [Schmidtea mediterranea]
SMESG000044281.1	-1.45948	1.08913e-15	1.86796e-14	Down	--	XP_015260507.1 PREDICTED: glycine N-acyltransferase-like protein 3 [Cyprinodon variegatus]
SMESG000044362.1	0.88841	2.44014e-09	2.41502e-08	Up	Os07g0688000	XP_022312852.1 manganese-dependent ADP-ribose/CDP-alcohol diphosphatase-like isoform X1 [Crassostrea virginica]
SMESG000044431.1	-1.65225	2.34135e-25	7.2264e-24	Down	yrbE	RWS27664.1 inositol 2-dehydrogenase-like protein [Leptotrombidium deliense]
SMESG000044487.1	0.952321	1.98788e-49	1.77928e-47	Up	Xirp2	XP_015771681.1 PREDICTED: xin actin-binding repeat-containing protein 2-like isoform X1 [Acropora digitifera]
SMESG000044540.1	1.21778	2.24679e-94	7.31279e-92	Up	--	-
SMESG000044557.1	-1.14169	1.18248e-20	2.83182e-19	Down	RAB27B	XP_022369506.1 ras-related protein Rab-27B [Enhydra lutris kenyoni]
SMESG000044678.1	1.24152	2.5774e-33	1.19067e-31	Up	MPEG1	XP_015766206.1 PREDICTED: LOW QUALITY PROTEIN: macrophage-expressed gene 1 protein-like [Acropora digitifera]
SMESG000044680.1	1.12819	6.68903e-07	4.88245e-06	Up	MPEG1	RMX43816.1 hypothetical protein pdam_00017055 [Pocillopora damicornis]
SMESG000044907.1	-0.878335	2.49845e-08	2.20593e-07	Down	TUBB4B	XP_030842712.1 tubulin beta-4B chain isoform X3 [Strongylocentrotus purpuratus]
SMESG000045007.1	-3.03205	1.24055e-83	3.06308e-81	Down	--	-
SMESG000045013.1	-0.917058	2.17699e-15	3.64214e-14	Down	LDAH	XP_033099710.1 lipid droplet-associated hydrolase-like isoform X1 [Anneissia japonica]
SMESG000045022.1	-1.01055	2.56927e-11	3.12613e-10	Down	--	-
SMESG000045072.1	-1.06353	4.44293e-22	1.17177e-20	Down	MAN2B1	XP_021363354.1 lysosomal alpha-mannosidase-like [Mizuhopecten yessoensis]
SMESG000045085.1	-1.22718	1.15536e-12	1.59095e-11	Down	MAN2B1	XP_011454672.1 PREDICTED: lysosomal alpha-mannosidase [Crassostrea gigas]
SMESG000045168.1	-1.25224	6.99324e-07	5.07861e-06	Down	--	XP_022086007.1 two pore calcium channel protein 1-like [Acanthaster planci]
SMESG000045248.1	-0.84725	0.0396662	0.0967899	Down	--	-
SMESG000045267.1	-1.30246	0.00092237	0.00377084	Down	CSH1	XP_023932950.1 inositol phosphoceramide mannosyltransferase 2-like [Lingula anatina]
SMESG000045436.1	-1.06132	3.1386e-21	7.82546e-20	Down	C38H2.2	PAA45971.1 hypothetical protein BOX15_Mlig007521g3 [Macrostomum lignano]
SMESG000045480.1	-0.951683	6.53469e-05	0.000343425	Down	CSH1	XP_023932950.1 inositol phosphoceramide mannosyltransferase 2-like [Lingula anatina]
SMESG000045543.1	-1.0025	1.96483e-19	4.30909e-18	Down	--	-
SMESG000045551.1	-2.14829	6.91467e-18	1.37154e-16	Down	SLC47A2	AKN21703.1 slc47a-6 [Schmidtea mediterranea]
SMESG000045571.1	-0.882798	1.93005e-07	1.50546e-06	Down	--	-
SMESG000045597.1	-2.13573	1.97017e-19	4.3142e-18	Down	--	XP_018094971.1 PREDICTED: microsomal triglyceride transfer protein large subunit [Xenopus laevis]
SMESG000045673.1	-2.67007	8.22914e-20	1.85883e-18	Down	--	-
SMESG000045893.1	-1.15626	9.16655e-26	2.89788e-24	Down	--	-
SMESG000046033.1	-0.920259	7.55909e-16	1.31376e-14	Down	abhd12	ROJ78935.1 Monoacylglycerol lipase ABHD12, partial [Anabarilius grahami]
SMESG000046092.1	-1.17415	2.08194e-25	6.43963e-24	Down	SULT1E1	PAA64171.1 hypothetical protein BOX15_Mlig013426g1 [Macrostomum lignano]
SMESG000046181.1	0.929966	8.63467e-05	0.000443374	Up	PLCL2	XP_025085674.1 LOW QUALITY PROTEIN: inactive phospholipase C-like protein 2 [Pomacea canaliculata]
SMESG000046208.1	0.823819	0.00140664	0.00550849	Up	--	ADD84676.1 Smed-NDK-3, partial [Schmidtea mediterranea]
SMESG000046228.1	-1.06072	1.65673e-09	1.66616e-08	Down	--	KAB0795559.1 hypothetical protein PPYR_12398 [Photinus pyralis]
SMESG000046412.1	-1.85485	2.2696e-08	2.01756e-07	Down	--	-
SMESG000046560.1	-0.891784	0.000360524	0.00163699	Down	--	-
SMESG000046694.1	-0.89889	0.000972246	0.00394658	Down	--	-
SMESG000046786.1	-0.896452	5.07676e-08	4.26418e-07	Down	--	AHD24744.1 X1.A.G7.1, partial [Schmidtea mediterranea]
SMESG000046823.1	-0.958048	0.00452904	0.0154026	Down	--	-
SMESG000046850.1	-1.12215	4.55908e-11	5.42281e-10	Down	--	-
SMESG000046966.1	-0.813584	1.90694e-05	0.000110519	Down	--	XP_009049303.1 hypothetical protein LOTGIDRAFT_231021 [Lottia gigantea]
SMESG000047104.1	-0.850295	0.0128766	0.0380918	Down	--	-
SMESG000047160.1	1.20674	1.56906e-33	7.31936e-32	Up	PLXNB2	AJA72715.1 plexin B-5, partial [Schmidtea mediterranea]
SMESG000047163.1	1.45392	1.73141e-06	1.18299e-05	Up	--	-
SMESG000047314.1	-0.838478	1.18158e-07	9.44277e-07	Down	--	-
SMESG000047333.1	-0.94364	2.22973e-48	1.92361e-46	Down	--	VDP74770.1 unnamed protein product [Echinostoma caproni]
SMESG000047487.1	-0.897832	1.23491e-06	8.62273e-06	Down	--	VDN97986.1 unnamed protein product [Rodentolepis nana]
SMESG000047489.1	1.12485	2.13908e-05	0.000122437	Up	--	-
SMESG000047560.1	1.20124	2.38237e-07	1.83627e-06	Up	--	-
SMESG000047739.1	1.23375	4.22036e-70	6.64174e-68	Up	ACTN4	XP_011425356.1 PREDICTED: alpha-actinin, sarcomeric isoform X2 [Crassostrea gigas]
SMESG000048230.1	0.828012	2.97526e-13	4.31262e-12	Up	--	AFJ24823.1 hypothetical protein [Schmidtea mediterranea]
SMESG000048275.1	-0.940317	9.74807e-21	2.34232e-19	Down	Fh	XP_017054623.1 PREDICTED: fumarate hydratase, mitochondrial [Drosophila ficusphila]
SMESG000048287.1	-2.05952	7.21843e-98	2.87153e-95	Down	--	-
SMESG000048413.1	-0.855264	1.93192e-54	2.09598e-52	Down	CTSB	XP_013409929.1 cathepsin B [Lingula anatina]
SMESG000048486.1	-0.927376	1.81301e-16	3.28245e-15	Down	trappc2l	XP_022344322.1 trafficking protein particle complex subunit 2-like protein [Crassostrea virginica]
SMESG000048502.1	-0.969522	5.43784e-17	1.02468e-15	Down	--	GBN03458.1 Phospholipase A2 [Araneus ventricosus]
SMESG000048581.1	-0.839465	1.11368e-38	6.5634e-37	Down	Vac14	ELU08010.1 hypothetical protein CAPTEDRAFT_167776 [Capitella teleta]
SMESG000048843.1	-0.833039	7.51799e-35	3.68716e-33	Down	Dpp7	CAX71061.1 putative Lysosomal Pro-X carboxypeptidase precursor [Schistosoma japonicum]
SMESG000048912.1	0.80743	1.76638e-28	6.32408e-27	Up	--	XP_009023387.1 hypothetical protein HELRODRAFT_185826, partial [Helobdella robusta]
SMESG000049067.1	1.26512	0.00137375	0.00539738	Up	--	-
SMESG000049183.1	-0.841212	6.28507e-11	7.32969e-10	Down	YPT1	PAA51109.1 hypothetical protein BOX15_Mlig011156g1 [Macrostomum lignano]
SMESG000049222.1	1.08683	3.88292e-11	4.65723e-10	Up	--	-
SMESG000049223.1	0.843497	5.9069e-06	3.70209e-05	Up	PTPRJ	XP_023957944.1 receptor-type tyrosine-protein phosphatase eta [Chrysemys picta bellii]
SMESG000049241.1	-0.855283	8.94906e-39	5.31782e-37	Down	ALDH7A1	XP_009028041.1 hypothetical protein HELRODRAFT_157787 [Helobdella robusta]
SMESG000049462.1	-1.22891	1.9792e-14	3.11474e-13	Down	Slc17a5	AKN21532.1 slc17a-9 [Schmidtea mediterranea]
SMESG000049466.1	-3.81593	2.16591e-32	9.51474e-31	Down	--	XP_031553749.1 DENN domain-containing protein 3-like isoform X2 [Actinia tenebrosa]
SMESG000049480.1	1.22201	8.40372e-33	3.79652e-31	Up	--	-
SMESG000049483.1	1.44077	3.13878e-86	8.32416e-84	Up	--	-
SMESG000049531.1	0.834728	6.75049e-06	4.19591e-05	Up	Vav1	XP_022337381.1 pleckstrin homology domain-containing family G member 5-like isoform X11 [Crassostrea virginica]
SMESG000049548.1	-0.943481	2.25031e-06	1.51157e-05	Down	TRAF3	ADF47430.1 TNF receptor-associated factor-2-like protein B [Dugesia japonica]
SMESG000049555.1	0.8817	4.65992e-31	1.91766e-29	Up	CTSL	AWM96389.1 cathepsin L2 [Dugesia japonica]
SMESG000049582.1	1.9632	9.88236e-26	3.10363e-24	Up	--	QFQ66916.1 trig-1 protein [Schmidtea mediterranea]
SMESG000049722.1	1.5235	9.77003e-126	7.77314e-123	Up	CTSV	AWM96389.1 cathepsin L2 [Dugesia japonica]
SMESG000049723.1	-2.20507	1.60108e-37	8.99178e-36	Down	LCP2	AWM96389.1 cathepsin L2 [Dugesia japonica]
SMESG000049783.1	-0.971337	4.45536e-19	9.53741e-18	Down	CTSL	AWM96389.1 cathepsin L2 [Dugesia japonica]
SMESG000049797.1	-1.27181	9.44885e-08	7.67538e-07	Down	--	-
SMESG000049841.1	-0.968442	5.71931e-08	4.77866e-07	Down	--	-
SMESG000049924.1	-4.12725	2.51633e-25	7.73311e-24	Down	--	GAA52233.1 hypothetical protein CLF_107652 [Clonorchis sinensis]
SMESG000050056.1	-1.17538	0.000379033	0.00171285	Down	CBSL	XP_025102106.1 cystathionine beta-synthase-like [Pomacea canaliculata]
SMESG000050121.1	-1.90721	1.36747e-10	1.54933e-09	Down	--	-
SMESG000050216.1	-3.56737	8.12894e-40	5.17398e-38	Down	--	ALJ10579.1 placenta specific protein 8 [Dugesia japonica]
SMESG000050288.1	-1.14052	5.42158e-31	2.21835e-29	Down	Cryl1	XP_014279515.1 lambda-crystallin homolog [Halyomorpha halys]
SMESG000050293.1	1.55958	9.76278e-08	7.89456e-07	Up	--	-
SMESG000050296.1	0.931901	3.63367e-14	5.60753e-13	Up	--	-
SMESG000050299.1	1.15573	1.06048e-26	3.4674e-25	Up	--	-
SMESG000050314.1	-0.981767	1.17584e-07	9.40211e-07	Down	--	-
SMESG000050315.1	0.935514	8.71491e-34	4.13266e-32	Up	--	-
SMESG000050398.1	1.66917	1.94336e-07	1.5148e-06	Up	--	TGZ60116.1 hypothetical protein CRM22_008735 [Opisthorchis felineus]
SMESG000050434.1	-1.54282	1.20394e-66	1.8149e-64	Down	CYP71B22	XP_002737962.1 PREDICTED: cytochrome P450 1A1-like [Saccoglossus kowalevskii]
SMESG000050486.1	-3.27181	1.37136e-86	3.77677e-84	Down	--	-
SMESG000050503.1	0.951459	1.12039e-14	1.78876e-13	Up	--	-
SMESG000050805.1	0.964174	0.000109995	0.000550592	Up	--	XP_012557682.1 PREDICTED: SCO-spondin-like [Hydra vulgaris]
SMESG000050820.1	-0.87532	2.03807e-07	1.58025e-06	Down	--	-
SMESG000050959.1	-1.76084	1.60518e-09	1.61885e-08	Down	Slc13a5	AKN21482.1 slc13a-3 [Schmidtea mediterranea]
SMESG000051012.1	2.33434	1.16294e-87	3.33089e-85	Up	--	-
SMESG000051013.1	1.10763	2.97896e-10	3.2616e-09	Up	--	-
SMESG000051055.1	-0.939897	4.29098e-06	2.75318e-05	Down	--	-
SMESG000051174.1	0.848352	1.82752e-07	1.4286e-06	Up	ASNS	AQT19753.1 hypothetical protein Smed-asns, partial [Schmidtea mediterranea]
SMESG000051354.1	-2.1468	6.56141e-28	2.25338e-26	Down	Pka-R2	XP_017066510.1 PREDICTED: cAMP-dependent protein kinase type II regulatory subunit isoform X1 [Drosophila eugracilis]
SMESG000051516.1	-1.43523	5.86301e-97	2.15293e-94	Down	mboat2	ABW97518.1 porcupine-like protein, partial [Schmidtea mediterranea]
SMESG000051540.1	1.00975	2.24157e-06	1.50669e-05	Up	HSPA8	QGN03550.1 heat shock protein 70-2 [Dugesia japonica]
SMESG000051567.1	1.48312	2.11011e-05	0.000120972	Up	HSPA8	QGN03550.1 heat shock protein 70-2 [Dugesia japonica]
SMESG000051626.1	1.07791	3.0203e-22	8.08482e-21	Up	--	ELU00686.1 hypothetical protein CAPTEDRAFT_125662 [Capitella teleta]
SMESG000051640.1	-1.53507	9.78718e-16	1.68464e-14	Down	CPIJ001621	XP_018024601.1 PREDICTED: adenylyltransferase and sulfurtransferase MOCS3-like [Hyalella azteca]
SMESG000051670.1	-0.95058	7.93674e-60	1.01484e-57	Down	ACT2	AJP08457.1 beta-actin [Polycelis sp. ZD-2015]
SMESG000051672.1	-0.856813	4.60245e-30	1.7814e-28	Down	ACT2	AJP08457.1 beta-actin [Polycelis sp. ZD-2015]
SMESG000051766.1	-0.986674	4.14352e-20	9.52477e-19	Down	myd88	ANN45087.1 myeloid differentiation factor 88 [Rana dybowskii]
SMESG000051913.1	1.56001	5.39466e-35	2.66403e-33	Up	--	AHD24748.1 X1.B.F11.1 [Schmidtea mediterranea]
SMESG000051914.1	2.26031	2.92024e-80	6.15012e-78	Up	--	-
SMESG000051917.1	2.13638	9.64258e-12	1.21881e-10	Up	--	AFJ24817.1 hypothetical protein, partial [Schmidtea mediterranea]
SMESG000051918.1	2.10915	4.73584e-29	1.7435e-27	Up	--	-
SMESG000051921.1	1.80687	3.76908e-44	2.85593e-42	Up	--	AHD24748.1 X1.B.F11.1 [Schmidtea mediterranea]
SMESG000051953.1	-1.85708	2.04551e-209	4.88229e-206	Down	GATM	AQT19752.1 hypothetical protein Smed-agat-1 [Schmidtea mediterranea]
SMESG000051964.1	-1.96382	1.00526e-182	1.79955e-179	Down	GATM	AQT19752.1 hypothetical protein Smed-agat-1 [Schmidtea mediterranea]
SMESG000051986.1	-1.09753	9.14631e-21	2.20142e-19	Down	SLC26A5	AKN21611.1 slc26a-7 [Schmidtea mediterranea]
SMESG000052008.1	-1.79348	5.06046e-32	2.18286e-30	Down	SLC26A5	AKN21611.1 slc26a-7 [Schmidtea mediterranea]
SMESG000052204.1	-0.877806	2.82856e-19	6.11901e-18	Down	CYP-1	TGZ63231.1 hypothetical protein CRM22_007025 [Opisthorchis felineus]
SMESG000052463.1	1.08491	1.57946e-07	1.24419e-06	Up	--	AHD24759.1 X1.D.H1.3 [Schmidtea mediterranea]
SMESG000052481.1	-1.7908	5.22513e-10	5.57178e-09	Down	--	-
SMESG000052539.1	-1.26907	1.66321e-42	1.18528e-40	Down	TMEM104	XP_013095562.1 PREDICTED: transmembrane protein 104-like [Biomphalaria glabrata]
SMESG000052594.1	-1.0191	4.84402e-05	0.00026099	Down	SPAC17G8.11c	PAA66559.1 hypothetical protein BOX15_Mlig012259g1 [Macrostomum lignano]
SMESG000052602.1	-1.72302	1.99941e-80	4.33842e-78	Down	--	XP_025948139.1 adipocyte plasma membrane-associated protein-like [Dromaius novaehollandiae]
SMESG000052648.1	1.30843	0.000116718	0.000582208	Up	EEF1A1	AQT19757.1 hypothetical protein Smed-ef1a-2 [Schmidtea mediterranea]
SMESG000052656.1	-1.07925	8.59479e-31	3.44779e-29	Down	mogat2-a	XP_029187260.1 2-acylglycerol O-acyltransferase 1-like [Acropora millepora]
SMESG000052690.1	-0.839936	5.21074e-08	4.36647e-07	Down	--	PAA65237.1 hypothetical protein BOX15_Mlig018174g1 [Macrostomum lignano]
SMESG000052792.1	1.4589	7.06046e-59	8.86955e-57	Up	--	-
SMESG000053011.1	-2.64895	3.18325e-49	2.77971e-47	Down	--	-
SMESG000053020.1	-2.54571	7.1116e-17	1.32095e-15	Down	--	-
SMESG000053119.1	-1.4629	5.82604e-28	2.01047e-26	Down	PRKAG3	RNA01427.1 5 -AMP-activated kinase subunit gamma-2 [Brachionus plicatilis]
SMESG000053202.1	-1.05146	4.4589e-82	1.06426e-79	Down	MAT2A	PAA84507.1 hypothetical protein BOX15_Mlig008771g3 [Macrostomum lignano]
SMESG000053503.1	-2.22083	6.62804e-32	2.84192e-30	Down	--	XP_021003341.1 microsomal triglyceride transfer protein large subunit-like [Parasteatoda tepidariorum]
SMESG000053627.1	1.24343	1.93934e-38	1.11539e-36	Up	Stk24	XP_001033277.2 cyclin-dependent kinase-like Serine/Threonine kinase family protein [Tetrahymena thermophila SB210]
SMESG000053667.1	-0.816756	5.76804e-05	0.000305601	Down	--	AFJ24785.1 vault protein inter alpha trypsin-1, partial [Schmidtea mediterranea]
SMESG000053861.1	-1.70656	1.12422e-80	2.51563e-78	Down	--	-
SMESG000053995.1	0.924937	0.00765434	0.0242678	Up	--	XP_005097924.1 PREDICTED: uncharacterized protein LOC101863019 [Aplysia californica]
SMESG000054042.1	1.21961	1.91778e-19	4.21882e-18	Up	stg	ANE21817.2 CDC25-2 protein, partial [Schmidtea mediterranea]
SMESG000054075.1	2.03544	2.82437e-28	1.00118e-26	Up	Cp1	VDL99111.1 unnamed protein product [Schistocephalus solidus]
SMESG000054266.1	-1.27789	1.12359e-09	1.14935e-08	Down	Slc5a6	AKN21418.1 slc5a-3 [Schmidtea mediterranea]
SMESG000054276.1	-1.25801	8.44431e-14	1.27296e-12	Down	SLC5A8	AKN21418.1 slc5a-3 [Schmidtea mediterranea]
SMESG000054476.1	-0.923192	7.63913e-33	3.46202e-31	Down	chmp2b	XP_013186830.1 PREDICTED: charged multivesicular body protein 2b [Amyelois transitella]
SMESG000054503.1	1.20867	0.00338785	0.0119766	Up	Gyc76C	XP_014672517.1 PREDICTED: receptor-type guanylate cyclase gcy-1-like [Priapulus caudatus]
SMESG000054597.1	0.805037	6.07931e-17	1.13806e-15	Up	--	-
SMESG000055069.1	1.26486	0.00131662	0.00519	Up	--	XP_029347265.1 zinc finger MYM-type protein 6-like [Acyrthosiphon pisum]
SMESG000055179.1	0.81676	1.84866e-08	1.65986e-07	Up	--	-
SMESG000055257.1	-0.852877	6.88775e-22	1.79019e-20	Down	unc-7	BAE78812.1 innexin3 [Dugesia japonica]
SMESG000055258.1	-0.801506	2.85756e-17	5.4637e-16	Down	inx-11	BAE78812.1 innexin3 [Dugesia japonica]
SMESG000055506.1	-2.02178	6.00016e-112	3.06887e-109	Down	CBSDUF6	PAA57531.1 hypothetical protein BOX15_Mlig009042g1 [Macrostomum lignano]
SMESG000055517.1	-1.09103	1.46801e-08	1.34078e-07	Down	--	-
SMESG000055533.1	1.3124	0.00261228	0.0095192	Up	--	-
SMESG000055659.1	-1.49895	6.01554e-23	1.6567e-21	Down	Chdh	XP_021265032.1 choline dehydrogenase, mitochondrial [Numida meleagris]
SMESG000055733.1	-1.57448	2.17742e-70	3.54351e-68	Down	unc-7	BAE78815.1 innexin7 [Dugesia japonica]
SMESG000055742.1	-1.25929	3.8962e-15	6.40614e-14	Down	--	ANO39078.1 GCR117 [Schmidtea mediterranea]
SMESG000055775.1	-0.965418	1.50888e-08	1.37198e-07	Down	--	XP_012941622.1 PREDICTED: uncharacterized protein LOC101854111 [Aplysia californica]
SMESG000055793.1	-1.04854	2.54705e-19	5.55194e-18	Down	--	XP_025080094.1 uncharacterized protein LOC112555793 isoform X1 [Pomacea canaliculata]
SMESG000055797.1	2.12174	1.43945e-71	2.42522e-69	Up	PI16	AFJ24739.1 GLI pathogenesis related-1, partial [Schmidtea mediterranea]
SMESG000055801.1	-1.29299	1.5134e-21	3.84962e-20	Down	iphP	PVD33085.1 hypothetical protein C0Q70_08534 [Pomacea canaliculata]
SMESG000055840.1	-0.822321	6.65232e-05	0.000348583	Down	--	-
SMESG000056012.1	0.877746	7.40009e-20	1.67685e-18	Up	DLC1	XP_018645543.1 rho-type gtpase activating protein, putative [Schistosoma mansoni]
SMESG000056013.1	-1.08731	7.81428e-56	9.02486e-54	Down	Lama2	XP_018652766.1 LOW QUALITY PROTEIN: putative laminin [Schistosoma mansoni]
SMESG000056016.1	-1.20194	1.29267e-12	1.77151e-11	Down	Lama2	TGZ60445.1 hypothetical protein CRM22_008536 [Opisthorchis felineus]
SMESG000056130.1	-0.974877	2.544e-37	1.42315e-35	Down	Lrrk2	QDP17043.1 leucine-rich repeat serine/threonine-protein kinase 2-like protein, partial [Dugesia japonica]
SMESG000056172.1	0.836065	1.83732e-08	1.65174e-07	Up	--	-
SMESG000056235.1	-1.66865	4.28763e-78	8.41139e-76	Down	--	-
SMESG000056325.1	-1.06949	0.00105256	0.00425211	Down	SLC2A13	AKN21403.1 slc2a-9, partial [Schmidtea mediterranea]
SMESG000056326.1	-1.28282	2.47462e-07	1.90022e-06	Down	SLC2A13	AKN21403.1 slc2a-9, partial [Schmidtea mediterranea]
SMESG000056331.1	-1.26154	1.13519e-19	2.52997e-18	Down	Slc2a13	AKN21403.1 slc2a-9, partial [Schmidtea mediterranea]
SMESG000056375.1	-1.86303	1.71847e-34	8.28625e-33	Down	--	-
SMESG000056430.1	-1.80624	3.64197e-20	8.41237e-19	Down	unc-9	AAF75840.1 putative gap junction protein pannexin [Girardia tigrina]
SMESG000056490.1	-1.37883	1.66172e-11	2.05366e-10	Down	CDC42	XP_014669503.1 PREDICTED: ras-related C3 botulinum toxin substrate 1-like isoform X1 [Priapulus caudatus]
SMESG000056509.1	-2.71368	2.83993e-33	1.30774e-31	Down	Pde4d	XP_029716999.1 LOW QUALITY PROTEIN: cAMP-specific 3',5'-cyclic phosphodiesterase-like [Aedes albopictus]
SMESG000056882.1	-1.3358	1.01683e-08	9.45581e-08	Down	--	-
SMESG000056922.1	-0.827001	4.6677e-07	3.46713e-06	Down	--	-
SMESG000056953.1	-1.97498	1.16553e-91	3.4774e-89	Down	AGPAT3	XP_005111448.1 PREDICTED: 1-acyl-sn-glycerol-3-phosphate acyltransferase delta-like [Aplysia californica]
SMESG000057201.1	1.21476	2.01169e-62	2.82445e-60	Up	--	-
SMESG000057252.1	-6.09565	4.33581e-228	1.55233e-224	Down	ABCC1	PAA88602.1 hypothetical protein BOX15_Mlig016190g1 [Macrostomum lignano]
SMESG000057282.1	-1.08974	5.69007e-27	1.89506e-25	Down	SLC28A3	AKN21616.1 slc28a-1 [Schmidtea mediterranea]
SMESG000057345.1	-1.06178	4.07184e-11	4.86752e-10	Down	svop	XP_012946293.1 PREDICTED: putative transporter SVOPL [Aplysia californica]
SMESG000057463.1	0.970215	0.0223001	0.0603818	Up	EPB41L2	XP_015803477.1 PREDICTED: band 4.1-like protein 2 [Nothobranchius furzeri]
SMESG000057626.1	0.982084	4.45253e-15	7.31246e-14	Up	--	-
SMESG000057652.1	-1.94195	9.8541e-10	1.01307e-08	Down	spns1	XP_022342148.1 LOW QUALITY PROTEIN: protein spinster homolog 1-like [Crassostrea virginica]
SMESG000057720.1	0.962393	2.41779e-12	3.24206e-11	Up	--	-
SMESG000057816.1	-1.99828	8.1319e-21	1.96718e-19	Down	--	THD27201.1 DM9 domain-containing protein [Fasciola hepatica]
SMESG000057910.1	-1.1954	9.21942e-20	2.06622e-18	Down	--	-
SMESG000057913.1	1.29433	1.05801e-06	7.46763e-06	Up	ACT1	XP_014350129.1 PREDICTED: actin, cytoplasmic type 5 isoform X1 [Latimeria chalumnae]
SMESG000057972.1	-1.98838	1.30685e-38	7.6079e-37	Down	RAB9B	AWL25032.1 Rab9A protein [Dugesia japonica]
SMESG000058074.1	-2.66389	5.17962e-39	3.14311e-37	Down	PDX2	XP_022792117.1 probable pyridoxal 5'-phosphate synthase subunit PDX2 [Stylophora pistillata]
SMESG000058130.1	-0.958893	1.45695e-05	8.55822e-05	Down	--	-
SMESG000058134.1	-2.12417	1.32862e-20	3.16592e-19	Down	Atp7a	XP_013080887.1 PREDICTED: copper-transporting ATPase 1-like isoform X2 [Biomphalaria glabrata]
SMESG000058218.1	-1.37564	2.18193e-49	1.94083e-47	Down	amdhd1	XP_006273053.1 PREDICTED: probable imidazolonepropionase [Alligator mississippiensis]
SMESG000058229.1	-2.2618	2.1409e-33	9.9545e-32	Down	tlcd4-a	AAW25956.1 SJCHGC06538 protein [Schistosoma japonicum]
SMESG000058274.1	-1.74992	6.33895e-13	8.93505e-12	Down	--	-
SMESG000058295.1	-1.25272	1.25904e-30	4.9538e-29	Down	--	XP_031553027.1 sushi domain-containing protein 2-like [Actinia tenebrosa]
SMESG000058321.1	-2.05021	2.81327e-25	8.62716e-24	Down	--	AHD24729.1 X1.C3.3 [Schmidtea mediterranea]
SMESG000058546.1	1.08913	2.81432e-06	1.86075e-05	Up	--	-
SMESG000058547.1	-1.59159	2.94717e-05	0.000164869	Down	--	-
SMESG000058576.1	1.10482	0.000313285	0.00144031	Up	PR1B1	THD26831.1 Golgi-associated plant pathogenesis protein 1 [Fasciola hepatica]
SMESG000058665.1	1.52288	3.72477e-09	3.61643e-08	Up	Ddc	BAF73418.1 aromatic amino acid decarboxylase [Dugesia japonica]
SMESG000058685.1	-1.0404	1.39421e-08	1.27745e-07	Down	--	-
SMESG000058838.1	-1.13047	9.06882e-33	4.0713e-31	Down	TPCN2	CAX82465.1 Two-pore calcium channel protein 2 (Voltage-dependent calcium channel protein TPC2) [Schistosoma japonicum]
SMESG000058901.1	-0.87729	3.47261e-19	7.47838e-18	Down	--	TNN05446.1 otopetrin-2-like isoform X1 isoform 1 [Schistosoma japonicum]
SMESG000058940.1	0.879993	4.62788e-36	2.43661e-34	Up	dymA	PAA75447.1 hypothetical protein BOX15_Mlig006466g1 [Macrostomum lignano]
SMESG000058947.1	-2.92753	4.48331e-31	1.8503e-29	Down	Grm3	XP_013409714.1 metabotropic glutamate receptor 2-like [Lingula anatina]
SMESG000058949.1	2.68496	6.54395e-21	1.60472e-19	Up	--	-
SMESG000058973.1	1.1173	1.2394e-05	7.3741e-05	Up	--	-
SMESG000058994.1	0.831049	0.00217628	0.00811629	Up	--	-
SMESG000059029.1	0.902729	4.97399e-07	3.68698e-06	Up	DNM1L	XP_033019328.1 dynamin-1-like protein isoform X2 [Lacerta agilis]
SMESG000059031.1	1.2564	3.62314e-51	3.48235e-49	Up	DNM1L	XP_030069629.1 dynamin-1-like protein isoform X2 [Microcaecilia unicolor]
SMESG000059443.1	0.812022	0.00919264	0.0284152	Up	LEF1	ATI22078.1 TCF-1 [Schmidtea mediterranea]
SMESG000059487.1	1.5197	0.000960811	0.00390792	Up	pkd2	AKN21729.1 PKD2-3 [Schmidtea mediterranea]
SMESG000059853.1	1.01587	3.42492e-10	3.73558e-09	Up	--	CBY89195.1 small HSP protein, partial [Dugesia japonica]
SMESG000060232.1	-1.15484	8.95873e-06	5.44327e-05	Down	--	-
SMESG000060313.1	2.2574	1.36053e-32	6.051e-31	Up	--	AWV63262.1 pks-1 [Schmidtea mediterranea]
SMESG000060484.1	-1.40751	5.46968e-16	9.62301e-15	Down	--	-
SMESG000060667.1	0.885818	0.014885	0.0431775	Up	Cip2a	TGZ76025.1 hypothetical protein CRM22_000053 [Opisthorchis felineus]
SMESG000060675.1	-3.41196	3.24378e-28	1.13858e-26	Down	w	PAA52991.1 hypothetical protein BOX15_Mlig012313g4 [Macrostomum lignano]
SMESG000060680.1	-3.27971	6.25019e-122	4.06859e-119	Down	CYP3A24	XP_022343234.1 cytochrome P450 3A24-like [Crassostrea virginica]
SMESG000060689.1	-1.43095	1.55539e-16	2.83755e-15	Down	CYP3A12	XP_011429711.1 PREDICTED: cytochrome P450 3A24 [Crassostrea gigas]
SMESG000060698.1	-1.78674	1.8808e-12	2.54343e-11	Down	--	AKN21500.1 slc16a-5, partial [Schmidtea mediterranea]
SMESG000060721.1	-0.832602	9.74565e-09	9.07461e-08	Down	RAB32	XP_018912879.1 PREDICTED: ras-related protein Rab-33-like [Bemisia tabaci]
SMESG000060724.1	1.0247	4.68857e-08	3.96838e-07	Up	RASL12	VDP65234.1 unnamed protein product [Echinostoma caproni]
SMESG000060777.1	-2.31494	1.56394e-94	5.20864e-92	Down	SPE1	XP_014767555.1 PREDICTED: ornithine decarboxylase-like isoform X1 [Octopus bimaculoides]
SMESG000061103.1	1.17214	1.75143e-16	3.17899e-15	Up	DYNLRB2	XP_032827019.1 dynein light chain roadblock-type 1 [Petromyzon marinus]
SMESG000061269.1	-0.848305	0.00845054	0.0264699	Down	hddc3	XP_002605561.1 hypothetical protein BRAFLDRAFT_101015 [Branchiostoma floridae]
SMESG000061340.1	-1.93773	7.89879e-79	1.59322e-76	Down	SPBC1861.05	XP_023300757.1 pseudouridine-metabolizing bifunctional protein C1861.05 [Lucilia cuprina]
SMESG000061390.1	-1.27428	8.90292e-36	4.58629e-34	Down	--	AKN21505.1 slc16a-10 [Schmidtea mediterranea]
SMESG000061393.1	-1.41972	9.97532e-25	2.98239e-23	Down	--	AKN21505.1 slc16a-10 [Schmidtea mediterranea]
SMESG000061394.1	-0.907268	2.14846e-11	2.62976e-10	Down	--	XP_028401611.1 uncharacterized protein LOC114524659 [Dendronephthya gigantea]
SMESG000061401.1	-0.824552	7.44335e-08	6.11918e-07	Down	--	XP_023228151.1 uncharacterized protein LOC111628560 [Centruroides sculpturatus]
SMESG000061502.1	1.25858	4.00551e-23	1.10953e-21	Up	--	-
SMESG000061639.1	-1.14614	1.4576e-42	1.04896e-40	Down	aspdh	OQV22161.1 putative L-aspartate dehydrogenase [Hypsibius dujardini]
SMESG000061767.1	-1.75466	1.61855e-96	5.79481e-94	Down	--	-
SMESG000061776.1	-1.01678	1.41064e-20	3.34465e-19	Down	--	ANO39067.1 GCR103 [Schmidtea mediterranea]
SMESG000061797.1	-2.26748	7.83461e-37	4.24998e-35	Down	--	-
SMESG000061816.1	1.41763	4.19806e-13	6.03013e-12	Up	--	-
SMESG000061853.1	-1.7016	2.89112e-15	4.80879e-14	Down	--	-
SMESG000061897.1	-0.819558	1.06877e-32	4.76819e-31	Down	AK3	AAV40857.1 GTP:AMP Phosphotransferase [Clonorchis sinensis]
SMESG000061955.1	-3.39064	5.32552e-17	1.00483e-15	Down	Aldh8a1	XP_022088838.1 aldehyde dehydrogenase family 8 member A1-like [Acanthaster planci]
SMESG000062015.1	1.20887	6.85269e-21	1.6747e-19	Up	--	-
SMESG000062465.1	-1.36694	1.90294e-13	2.79221e-12	Down	--	AKN21500.1 slc16a-5, partial [Schmidtea mediterranea]
SMESG000062468.1	-2.6641	4.30199e-32	1.86129e-30	Down	oxlT	AKN21500.1 slc16a-5, partial [Schmidtea mediterranea]
SMESG000062579.1	-1.15957	0.0023377	0.00863284	Down	--	XP_017092394.1 PREDICTED: phospholipid scramblase 1 [Drosophila bipectinata]
SMESG000062649.1	0.873263	5.29237e-21	1.30676e-19	Up	--	AFJ24819.1 1-Jun [Schmidtea mediterranea]
SMESG000062681.1	-1.09396	0.000780438	0.00324431	Down	--	VDN14620.1 unnamed protein product [Dibothriocephalus latus]
SMESG000062718.1	1.0546	2.13506e-06	1.44023e-05	Up	--	XP_009172576.1 hypothetical protein T265_08498 [Opisthorchis viverrini]
SMESG000062744.1	-1.18266	7.43452e-28	2.54712e-26	Down	mpv17l2	CDS32755.1 mpv17 protein 2 [Hymenolepis microstoma]
SMESG000062750.1	-2.2362	7.70747e-58	9.35412e-56	Down	--	-
SMESG000062760.1	-0.987328	8.74082e-35	4.25773e-33	Down	cpe	XP_013414827.1 carboxypeptidase E [Lingula anatina]
SMESG000062786.1	0.878222	2.51945e-24	7.37854e-23	Up	--	-
SMESG000062806.1	1.48692	3.00213e-14	4.67321e-13	Up	--	AFJ24722.1 inhibin-1 [Schmidtea mediterranea]
SMESG000062836.1	1.50901	3.08234e-35	1.54885e-33	Up	--	AHD24723.1 X1.A5.1, partial [Schmidtea mediterranea]
SMESG000062860.1	-0.854858	0.0400922	0.097663	Down	ovca2	CDS22186.1 ovarian cancer associated gene 2 protein [Echinococcus granulosus]
SMESG000062943.1	0.808967	0.00104616	0.00422864	Up	--	-
SMESG000062945.1	-1.95262	1.84277e-08	1.6556e-07	Down	--	-
SMESG000062986.1	0.96069	2.77159e-06	1.83419e-05	Up	--	-
SMESG000062995.1	0.891609	1.4496e-08	1.32565e-07	Up	--	-
SMESG000063175.1	1.38283	5.71657e-13	8.08963e-12	Up	--	-
SMESG000063448.1	2.04586	1.24603e-09	1.27007e-08	Up	--	AFJ24867.1 peptidoglycan recognition protein-1 [Schmidtea mediterranea]
SMESG000063471.1	1.35341	7.78444e-12	9.93591e-11	Up	Cp1	PAV61346.1 hypothetical protein WR25_18197 [Diploscapter pachys]
SMESG000063517.1	2.38747	3.35206e-24	9.75708e-23	Up	Cp1	PAA54736.1 hypothetical protein BOX15_Mlig002369g2 [Macrostomum lignano]
SMESG000063559.1	-0.924797	5.23334e-29	1.9168e-27	Down	Glipr2	CDS15049.1 venom allergen val protein [Echinococcus granulosus]
SMESG000063593.1	-2.34481	1.36934e-116	8.52624e-114	Down	Dock2	XP_021925129.1 dedicator of cytokinesis protein 3 isoform X2 [Zootermopsis nevadensis]
SMESG000063595.1	-2.31202	1.88408e-96	6.58097e-94	Down	Dock3	XP_029190429.1 uncharacterized protein LOC114957238 [Acropora millepora]
SMESG000063621.1	0.90308	0.0246825	0.0656047	Up	UBQ8	PWV12995.1 putative polyubiquitin [Trypanosoma cruzi]
SMESG000063826.1	-2.00705	3.70984e-58	4.58005e-56	Down	--	RXN10576.1 glycine N-acyltransferase 3 [Labeo rohita]
SMESG000063885.1	1.31705	1.10897e-15	1.89744e-14	Up	Cyp2c23	PAA81231.1 hypothetical protein BOX15_Mlig004420g4 [Macrostomum lignano]
SMESG000064024.1	1.04429	5.30876e-05	0.000283365	Up	--	-
SMESG000064049.1	-0.970883	1.24106e-22	3.37894e-21	Down	Grm1	XP_013385784.1 metabotropic glutamate receptor 1 [Lingula anatina]
SMESG000064122.1	-0.933693	2.14007e-09	2.12685e-08	Down	SLC1A2	AKN21394.1 slc1a-4, partial [Schmidtea mediterranea]
SMESG000064135.1	-1.24922	3.11406e-07	2.36586e-06	Down	Cda	XP_008050974.1 cytidine deaminase [Carlito syrichta]
SMESG000064137.1	-0.881745	0.00443874	0.015135	Down	Cda	XP_004349982.1 cytidine deaminase [Cavenderia fasciculata]
SMESG000064239.1	-0.853368	1.45192e-05	8.53569e-05	Down	C19orf44	XP_032217765.1 uncharacterized protein C19orf44 isoform X2 [Nematostella vectensis]
SMESG000064317.1	0.947037	0.0172484	0.0488749	Up	psmc3ip	XP_019635052.1 PREDICTED: homologous-pairing protein 2 homolog [Branchiostoma belcheri]
SMESG000064358.1	-0.911351	9.72538e-45	7.5285e-43	Down	Dync1h1	TNN11253.1 Cytoplasmic dynein 1 heavy chain 1 isoform 1 [Schistosoma japonicum]
SMESG000064381.1	-1.08427	3.03181e-09	2.96981e-08	Down	--	-
SMESG000064425.1	-1.29244	1.38381e-18	2.85556e-17	Down	--	-
SMESG000064458.1	-2.73959	1.44441e-77	2.75805e-75	Down	--	-
SMESG000064528.1	-0.803226	1.23029e-06	8.59462e-06	Down	SLC22A5	AKN21553.1 slc22a-5 [Schmidtea mediterranea]
SMESG000064571.1	1.74425	1.0985e-08	1.01889e-07	Up	Slc26a6	AKN21608.1 slc26a-4 [Schmidtea mediterranea]
SMESG000064601.1	1.09237	0.000331717	0.00151822	Up	--	AHD24734.1 1.E7.3 [Schmidtea mediterranea]
SMESG000064660.1	-1.97217	6.7568e-09	6.36607e-08	Down	OsI_16936	BAU19443.1 serine racemase [Dugesia japonica]
SMESG000064723.1	0.813741	0.023307	0.0626329	Up	--	CBY11031.1 unnamed protein product [Oikopleura dioica]
SMESG000064809.1	-1.18982	0.00018035	0.000866706	Down	--	-
SMESG000064829.1	-2.42374	4.71313e-34	2.24242e-32	Down	SLC10A2	AKN21470.1 slc10a-3 [Schmidtea mediterranea]
SMESG000064881.1	-1.1121	7.54329e-31	3.04303e-29	Down	Lgsn	KAA0195568.1 Glutamine synthetase [Fasciolopsis buski]
SMESG000064939.1	-1.23334	1.2424e-40	8.05085e-39	Down	Abcc1	PAA88602.1 hypothetical protein BOX15_Mlig016190g1 [Macrostomum lignano]
SMESG000065078.1	-2.5306	1.67094e-22	4.51501e-21	Down	--	AKN21694.1 slc46a-2 [Schmidtea mediterranea]
SMESG000065348.1	-1.71343	2.49088e-80	5.32416e-78	Down	--	-
SMESG000065349.1	-1.71884	1.09916e-55	1.25929e-53	Down	--	-
SMESG000065355.1	-1.68466	1.2721e-82	3.08776e-80	Down	--	-
SMESG000065389.1	-0.999037	8.64625e-05	0.00044381	Down	CG11077	XP_005107414.2 PREDICTED: protein Mpv17-like [Aplysia californica]
SMESG000065390.1	0.804068	0.0035665	0.0125093	Up	htr2b	ANO39015.1 GCR037 [Schmidtea mediterranea]
SMESG000065550.1	-1.62351	2.45467e-12	3.28535e-11	Down	CIB2	XP_021343724.1 calcium and integrin-binding protein 1-like [Mizuhopecten yessoensis]
SMESG000065551.1	-2.20086	9.48583e-19	1.98606e-17	Down	CIB2	GBM51171.1 Calcium and integrin-binding family member 2 [Araneus ventricosus]
SMESG000065604.1	-0.802631	0.0376243	0.0927398	Down	--	AKN21692.1 slc44a-3 [Schmidtea mediterranea]
SMESG000065608.1	-0.967292	3.17927e-11	3.83899e-10	Down	SLC47A1	AKN21699.1 slc47a-2 [Schmidtea mediterranea]
SMESG000065727.1	-1.15088	1.06238e-22	2.90905e-21	Down	--	AEJ08756.1 copper chaperone Atox1 [Crassostrea ariakensis]
SMESG000065836.1	1.37658	8.02024e-16	1.39222e-14	Up	--	-
SMESG000065880.1	-1.1126	0.00241933	0.00890444	Down	SPAC17G8.11c	PAA75775.1 hypothetical protein BOX15_Mlig017105g1 [Macrostomum lignano]
SMESG000065897.1	-0.918319	0.000119629	0.000595071	Down	--	-
SMESG000065921.1	-1.57801	1.89617e-14	2.98736e-13	Down	unc-7	PAA52887.1 hypothetical protein BOX15_Mlig006041g2 [Macrostomum lignano]
SMESG000065938.1	-3.41634	6.23663e-43	4.55688e-41	Down	--	XP_012942420.1 PREDICTED: uncharacterized protein LOC101845869 [Aplysia californica]
SMESG000066020.1	1.57193	6.01907e-89	1.75917e-86	Up	act-2b	KAA3676143.1 actin beta/gamma 1 [Paragonimus westermani]
SMESG000066258.1	0.908734	0.00227088	0.00843174	Up	Pi16	CDS29748.1 hypothetical protein HmN_000895800 [Hymenolepis microstoma]
SMESG000066332.1	-2.33415	4.62158e-24	1.33979e-22	Down	--	-
SMESG000066365.1	-0.885803	3.98038e-06	2.57234e-05	Down	--	-
SMESG000066384.1	0.800894	2.00757e-15	3.36263e-14	Up	--	AFD29622.1 ZFP-1 [Schmidtea mediterranea]
SMESG000066416.1	0.962353	5.48221e-18	1.09194e-16	Up	--	-
SMESG000066417.1	0.932178	3.27446e-06	2.14911e-05	Up	--	-
SMESG000066535.1	-0.953384	1.20239e-10	1.37207e-09	Down	--	-
SMESG000066563.1	-4.38174	1.70218e-225	4.87538e-222	Down	daao-1	BAN78701.1 D-amino acid oxidase [Dugesia ryukyuensis]
SMESG000066568.1	-1.11233	9.63145e-22	2.48975e-20	Down	--	XP_009164078.1 hypothetical protein T265_01724 [Opisthorchis viverrini]
SMESG000066569.1	-0.872215	2.68703e-19	5.83044e-18	Down	DDO	BAN78701.1 D-amino acid oxidase [Dugesia ryukyuensis]
SMESG000066574.1	0.937916	2.41158e-12	3.23676e-11	Up	Pax5	DAA12514.1 TPA_inf: Pax-beta2 paired domain protein, partial [Schmidtea mediterranea]
SMESG000066595.1	0.949095	3.78893e-12	4.9781e-11	Up	ECU02_0740i	XP_023135931.1 polyubiquitin-C [Amphiprion ocellaris]
SMESG000066596.1	2.10102	7.53585e-40	4.8179e-38	Up	--	-
SMESG000066598.1	0.964571	5.22484e-08	4.37572e-07	Up	--	AHY82417.1 hypothetical protein, partial [Schmidtea mediterranea]
SMESG000066667.1	1.80612	4.3852e-09	4.22898e-08	Up	--	-
SMESG000066719.1	-1.29283	1.22233e-06	8.55152e-06	Down	ETHE1	XP_014288724.1 persulfide dioxygenase ETHE1, mitochondrial [Halyomorpha halys]
SMESG000066725.1	0.944795	1.03649e-14	1.65666e-13	Up	egl-13	AFJ24768.1 soxP-5, partial [Schmidtea mediterranea]
SMESG000066847.1	-0.934865	8.72779e-36	4.5123e-34	Down	SLC17A5	AKN21526.1 slc17a-3 [Schmidtea mediterranea]
SMESG000066927.1	1.32276	5.90136e-11	6.92732e-10	Up	--	-
SMESG000066997.1	1.65538	4.17963e-11	4.98389e-10	Up	--	ARM37835.1 synaptotagmin XV-like protein [Schmidtea mediterranea]
SMESG000067191.1	-0.952215	3.09061e-14	4.8005e-13	Down	--	-
SMESG000067681.1	2.41467	0.00186631	0.00709997	Up	--	-
SMESG000067788.1	1.17131	7.61121e-20	1.72196e-18	Up	--	-
SMESG000067794.1	0.858605	1.13022e-05	6.74994e-05	Up	xiap	-
SMESG000067850.1	1.59998	6.91231e-06	4.28719e-05	Up	--	-
SMESG000067906.1	2.43947	3.1405e-46	2.5554e-44	Up	his-48	AFJ24860.1 histone h2b-2, partial [Schmidtea mediterranea]
SMESG000067932.1	0.845484	2.46865e-11	3.00625e-10	Up	H2AC21	XP_018096298.1 PREDICTED: histone H2A type 1-like [Xenopus laevis]
SMESG000067935.1	1.03986	1.65554e-50	1.54418e-48	Up	PTPRJ	XP_015255524.1 PREDICTED: receptor-type tyrosine-protein phosphatase H-like [Cyprinodon variegatus]
SMESG000067946.1	1.34141	6.57296e-16	1.15075e-14	Up	--	-
SMESG000067986.1	-1.84398	9.24882e-114	4.90564e-111	Down	Enpep	XP_009563298.1 PREDICTED: glutamyl aminopeptidase [Cuculus canorus]
SMESG000068004.1	0.977281	0.00466015	0.0158072	Up	--	-
SMESG000068090.1	-2.83184	1.08341e-77	2.09669e-75	Down	RDX	XP_011453118.1 PREDICTED: radixin isoform X3 [Crassostrea gigas]
SMESG000068162.1	-2.43977	1.72924e-24	5.11663e-23	Down	PRKACB	XP_023266811.1 cAMP-dependent protein kinase catalytic subunit beta-like isoform X1 [Seriola lalandi dorsalis]
SMESG000068192.1	-1.84808	8.02263e-188	1.64132e-184	Down	CHD5	ADE34162.1 chromodomain helicase DNA-binding protein 4 [Schmidtea mediterranea]
SMESG000068193.1	-1.40298	2.07194e-06	1.40162e-05	Down	--	XP_031571408.1 TNF receptor-associated factor 5-like [Actinia tenebrosa]
SMESG000068402.1	-1.45353	2.7159e-93	8.2754e-91	Down	Gatm	VDP77876.1 unnamed protein product [Echinostoma caproni]
SMESG000068428.1	-0.907456	2.53106e-15	4.22463e-14	Down	--	AIX99543.1 pmp-10, partial [Schmidtea mediterranea]
SMESG000068458.1	-1.21675	1.3915e-22	3.78134e-21	Down	ada	THD26775.1 Adenosine deaminase [Fasciola hepatica]
SMESG000068461.1	-1.15953	1.72452e-18	3.53318e-17	Down	ada	XP_022083748.1 adenosine deaminase-like isoform X1 [Acanthaster planci]
SMESG000068583.1	1.26958	8.7809e-06	5.33975e-05	Up	--	-
SMESG000068604.1	1.0234	9.06496e-41	5.92782e-39	Up	SLC30A1	AKN21627.1 slc30a-7 [Schmidtea mediterranea]
SMESG000068620.1	-1.55524	3.443e-15	5.68711e-14	Down	Stk33	XP_029812828.1 serine/threonine-protein kinase 33 isoform X1 [Suricata suricatta]
SMESG000068743.1	-1.25495	2.12539e-86	5.74296e-84	Down	--	AIX99543.1 pmp-10, partial [Schmidtea mediterranea]
SMESG000068774.1	1.72159	1.23298e-47	1.05105e-45	Up	--	-
SMESG000068865.1	-1.3571	1.61763e-52	1.58672e-50	Down	--	-
SMESG000068874.1	-1.17177	1.03929e-07	8.37106e-07	Down	ELOVL	XP_011445953.1 PREDICTED: elongation of very long chain fatty acids protein 7 [Crassostrea gigas]
SMESG000068877.1	-2.77226	2.37395e-36	1.26384e-34	Down	ELOVL	XP_011445953.1 PREDICTED: elongation of very long chain fatty acids protein 7 [Crassostrea gigas]
SMESG000068909.1	-2.97671	1.41676e-15	2.40966e-14	Down	--	PAA57444.1 hypothetical protein BOX15_Mlig023060g3 [Macrostomum lignano]
SMESG000068925.1	0.953763	3.96538e-12	5.19088e-11	Up	--	-
SMESG000068931.1	0.890438	3.55884e-09	3.46003e-08	Up	PTPRM	-
SMESG000069184.1	-0.808969	0.00332367	0.0117817	Down	--	-
SMESG000069322.1	1.1706	1.31684e-19	2.92379e-18	Up	PTK7	XP_018324975.1 epithelial discoidin domain-containing receptor 1 [Agrilus planipennis]
SMESG000069398.1	-1.08886	4.64557e-13	6.63964e-12	Down	RAB5B	XP_021338491.1 Rab family, other [Babesia microti strain RI] [Babesia microti]
SMESG000069399.1	-2.30061	6.2006e-28	2.13459e-26	Down	VPS21	CDW71257.1 gtp binding protein [Stylonychia lemnae]
SMESG000069533.1	0.857047	0.0235583	0.0632031	Up	GRIK5	PAA91976.1 hypothetical protein BOX15_Mlig017883g1, partial [Macrostomum lignano]
SMESG000069597.1	1.00719	2.06471e-20	4.82361e-19	Up	--	RNA11436.1 ETS homologous factor isoform X2 [Brachionus plicatilis]
SMESG000069640.1	-1.90381	1.43704e-39	8.83253e-38	Down	--	AJA72716.1 semaphorin 1, partial [Schmidtea mediterranea]
SMESG000069660.1	-1.1344	3.57542e-07	2.68644e-06	Down	GWT1	XP_013407978.1 phosphatidylinositol-glycan biosynthesis class W protein isoform X1 [Lingula anatina]
SMESG000069669.1	-2.23936	3.82402e-28	1.33245e-26	Down	--	AKN21505.1 slc16a-10 [Schmidtea mediterranea]
SMESG000069681.1	-1.65716	1.57437e-13	2.32678e-12	Down	--	AKN21505.1 slc16a-10 [Schmidtea mediterranea]
SMESG000069687.1	-0.976424	0.000418971	0.0018762	Down	--	VZI39021.1 unnamed protein product [Sparganum proliferum]
SMESG000069796.1	-2.58342	1.04172e-53	1.08894e-51	Down	--	-
SMESG000069832.1	-2.57165	1.14775e-31	4.84196e-30	Down	--	-
SMESG000069852.1	0.898145	7.42578e-16	1.29373e-14	Up	--	-
SMESG000069905.1	-3.5751	2.67854e-41	1.81798e-39	Down	SLC39A1	AKN21678.1 slc39a-13 [Schmidtea mediterranea]
SMESG000070014.1	1.17295	7.29632e-53	7.30703e-51	Up	--	-
SMESG000070072.1	-0.997487	3.108e-35	1.55628e-33	Down	--	-
SMESG000070097.1	-0.943734	5.86868e-17	1.10151e-15	Down	KFase	XP_007886847.1 PREDICTED: kynurenine formamidase [Callorhinchus milii]
SMESG000070131.1	-1.18747	0.00118074	0.00471144	Down	--	XP_028411641.1 TNF receptor-associated factor 3-like [Dendronephthya gigantea]
SMESG000070267.1	-1.37964	4.7926e-54	5.122e-52	Down	--	AFJ24792.1 TNF receptor associated factor-2, partial [Schmidtea mediterranea]
SMESG000070271.1	-0.802789	6.19049e-06	3.87304e-05	Down	--	XP_031574150.1 TNF receptor-associated factor 6-like [Actinia tenebrosa]
SMESG000070308.1	-0.809682	9.27901e-05	0.000472774	Down	--	XP_011431277.1 PREDICTED: cell wall protein PRY3 isoform X4 [Crassostrea gigas]
SMESG000070472.1	-1.14113	8.22654e-39	4.92938e-37	Down	Tcaf3	XP_020894935.1 TRPM8 channel-associated factor homolog [Exaiptasia pallida]
SMESG000070485.1	0.946153	0.0190664	0.0530606	Up	--	-
SMESG000070491.1	-2.06774	7.87407e-30	2.9911e-28	Down	--	XP_019630926.1 PREDICTED: Williams-Beuren syndrome chromosomal region 27 protein-like [Branchiostoma belcheri]
SMESG000070747.1	1.27575	0.00127144	0.00502575	Up	--	-
SMESG000070758.1	-1.22621	2.04851e-08	1.8324e-07	Down	--	PAA81608.1 hypothetical protein BOX15_Mlig011978g2 [Macrostomum lignano]
SMESG000070778.1	2.28228	3.76361e-23	1.04455e-21	Up	htr1aa	ANO38993.1 GCR011 [Schmidtea mediterranea]
SMESG000070848.1	-1.46379	5.49023e-11	6.46061e-10	Down	PRY1	TNN11982.1 Golgi-associated plant pathogenesis-related protein [Schistosoma japonicum]
SMESG000070880.1	-0.84682	9.94833e-06	6.00126e-05	Down	--	-
SMESG000070890.1	0.992972	8.14645e-15	1.30937e-13	Up	--	-
SMESG000070985.1	-4.36212	4.79597e-22	1.25563e-20	Down	POSTN	THD27333.1 Gynecophoral canal protein [Fasciola hepatica]
SMESG000071076.1	0.909016	0.000477685	0.0021062	Up	Dync1h1	TRY63473.1 hypothetical protein TCAL_02090 [Tigriopus californicus]
SMESG000071232.1	-1.37179	9.60359e-09	8.95397e-08	Down	--	PAA78931.1 hypothetical protein BOX15_Mlig015448g3 [Macrostomum lignano]
SMESG000071344.1	-1.14689	9.10693e-14	1.36852e-12	Down	--	-
SMESG000071424.1	-0.9463	0.00444402	0.0151494	Down	NIT2	XP_030762381.1 omega-amidase NIT2 [Sitophilus oryzae]
SMESG000071428.1	-0.980964	0.00425243	0.0145587	Down	NIT2	CCM16511.1 nitrilase, putative [Leishmania guyanensis]
SMESG000071466.1	-0.835024	1.82747e-10	2.04943e-09	Down	--	XP_022329715.1 D-beta-hydroxybutyrate dehydrogenase, mitochondrial-like [Crassostrea virginica]
SMESG000071518.1	-1.32973	9.4688e-38	5.35979e-36	Down	--	-
SMESG000072026.1	-1.75566	2.40749e-09	2.38435e-08	Down	--	-
SMESG000072142.1	1.61932	2.93122e-57	3.46926e-55	Up	--	-
SMESG000072407.1	-1.05764	5.59628e-13	7.93508e-12	Down	dhdh	XP_006563740.2 trans-1,2-dihydrobenzene-1,2-diol dehydrogenase [Apis mellifera]
SMESG000072428.1	-1.27278	1.71335e-12	2.32357e-11	Down	--	-
SMESG000072446.1	0.87861	4.27906e-22	1.13272e-20	Up	SLC2A5	AKN21396.1 slc2a-1 [Schmidtea mediterranea]
SMESG000072479.1	0.811191	0.00473898	0.0160518	Up	--	-
SMESG000072520.1	-2.26007	1.79575e-20	4.22977e-19	Down	DHRS11	NP_001002143.2 dehydrogenase/reductase SDR family member 11b [Danio rerio]
SMESG000072523.1	-1.01819	2.60049e-10	2.87358e-09	Down	--	QFQ66895.1 hypothetical protein [Schmidtea mediterranea]
SMESG000072546.1	0.892302	1.33943e-10	1.51997e-09	Up	Hck	P42687.1 RecName: Full=Tyrosine-protein kinase SPK-1 [Girardia tigrina]
SMESG000072548.1	0.993878	8.48289e-54	8.93261e-52	Up	Src64B	P42687.1 RecName: Full=Tyrosine-protein kinase SPK-1 [Girardia tigrina]
SMESG000072549.1	-0.991906	0.000609069	0.00261308	Down	--	-
SMESG000072676.1	1.74264	0.017024	0.0483436	Up	Pi16	XP_027753230.1 peptidase inhibitor 16 [Empidonax traillii]
SMESG000072722.1	-2.51264	8.28663e-21	2.00123e-19	Down	CYP2F3	QCQ73702.1 P450 2B-like protein [Dugesia japonica]
SMESG000072744.1	-1.74898	1.34854e-31	5.66347e-30	Down	CYP2U1	QCQ73702.1 P450 2B-like protein [Dugesia japonica]
SMESG000072893.1	-0.802712	6.24651e-06	3.90298e-05	Down	--	AFJ24792.1 TNF receptor associated factor-2, partial [Schmidtea mediterranea]
SMESG000072902.1	1.08283	4.01269e-14	6.1791e-13	Up	PTEN	BAU21064.1 Hr-PTEN protein [Halocynthia roretzi]
SMESG000072914.1	-1.5328	1.5729e-37	8.86833e-36	Down	ABHD17A	THD21030.1 Protein ABHD17C [Fasciola hepatica]
SMESG000073115.1	-0.864451	5.56581e-13	7.89969e-12	Down	Adamtsl1	TPP63893.1 AdamTS protein 3 [Fasciola gigantica]
SMESG000073127.1	-0.947361	1.63248e-38	9.42694e-37	Down	COTL1	ABZ88707.1 coactosin-like protein [Eisenia fetida]
SMESG000073280.1	-0.860503	7.81317e-18	1.54761e-16	Down	Slc26a11	AKN21606.1 slc26a-2 [Schmidtea mediterranea]
SMESG000073395.1	-1.00582	2.61041e-08	2.30054e-07	Down	--	-
SMESG000073407.1	1.66411	5.21474e-33	2.38595e-31	Up	DNAH10	VDD74852.1 unnamed protein product [Mesocestoides corti]
SMESG000073414.1	1.25526	8.90383e-10	9.21928e-09	Up	DNAH10	VZI19223.1 unnamed protein product [Sparganum proliferum]
SMESG000073666.1	-3.79729	9.9279e-31	3.96037e-29	Down	VWF	XP_022332232.1 apolipophorins-like [Crassostrea virginica]
SMESG000074007.1	2.16765	1.42471e-22	3.85696e-21	Up	Rap1	XP_011662785.1 GTP-binding protein Di-Ras2-like [Strongylocentrotus purpuratus]
SMESG000074066.1	-1.92002	3.41261e-34	1.62907e-32	Down	vdr	TGZ65983.1 hypothetical protein CRM22_005579 [Opisthorchis felineus]
SMESG000074073.1	1.19216	0.00086846	0.00357289	Up	d215	ANO39054.1 GCR087 [Schmidtea mediterranea]
SMESG000074204.1	0.926143	9.21139e-07	6.56627e-06	Up	acp4	QGW52012.1 lysosomal acid phosphatase [Dugesia japonica]
SMESG000074226.1	-0.860282	3.59042e-05	0.000198269	Down	Abcc1	XP_022323795.1 multidrug resistance-associated protein 1-like isoform X2 [Crassostrea virginica]
SMESG000074282.1	-0.820654	2.93367e-16	5.23201e-15	Down	ATP11C	PAA83464.1 hypothetical protein BOX15_Mlig032035g1 [Macrostomum lignano]
SMESG000074416.1	-1.18087	1.35851e-35	6.92356e-34	Down	ATG1A	KRX07431.1 Protein kinase-like domain [Pseudocohnilembus persalinus]
SMESG000074486.1	-0.958665	3.2197e-07	2.44223e-06	Down	loxl2a	PAA77785.1 hypothetical protein BOX15_Mlig025085g1 [Macrostomum lignano]
SMESG000074503.1	1.13135	6.68851e-08	5.53357e-07	Up	--	PAA53931.1 hypothetical protein BOX15_Mlig023664g1 [Macrostomum lignano]
SMESG000074532.1	-1.03208	3.24402e-09	3.16685e-08	Down	Upp2	VDK38180.1 unnamed protein product [Taenia asiatica]
SMESG000074719.1	-0.960458	3.74818e-37	2.06452e-35	Down	--	-
SMESG000074726.1	0.985249	6.56737e-44	4.89851e-42	Up	TPP2	XP_029641546.1 tripeptidyl-peptidase 2-like [Octopus vulgaris]
SMESG000074738.1	-1.01486	1.66947e-11	2.06108e-10	Down	--	-
SMESG000074768.1	1.07252	8.44109e-20	1.9007e-18	Up	Mpped2	KAF1315825.1 hypothetical protein MS3_0015708 [Schistosoma haematobium]
SMESG000075109.1	-0.82399	1.44139e-20	3.41193e-19	Down	v	AMB26750.1 tryptophan-2,3-dioxygenase, partial [Leptochiton asellus]
SMESG000075481.1	-1.1032	1.07841e-61	1.45698e-59	Down	--	XP_011497752.1 PREDICTED: lipid storage droplets surface-binding protein 2-like [Ceratosolen solmsi marchali]
SMESG000075530.1	-1.2025	1.26565e-09	1.28823e-08	Down	--	AFJ24792.1 TNF receptor associated factor-2, partial [Schmidtea mediterranea]
SMESG000075918.1	-1.3636	7.87604e-43	5.69661e-41	Down	CLN3	TNN12998.1 Protein BTN1 [Schistosoma japonicum]
SMESG000075929.1	1.11956	0.001871	0.00711234	Up	foxf1	XP_014227366.1 forkhead box protein A2-like [Trichogramma pretiosum]
SMESG000075938.1	-2.49953	2.20414e-29	8.22016e-28	Down	--	AKN21558.1 slc22a-10 [Schmidtea mediterranea]
SMESG000076047.1	0.803935	0.0346342	0.0866521	Up	--	-
SMESG000076068.1	-0.866216	3.4032e-05	0.000188393	Down	YPT1	RTG84018.1 Ras-related protein Rab-1A [Schistosoma bovis]
SMESG000076072.1	1.44919	4.8458e-37	2.65888e-35	Up	--	ANO38983.1 orphan chemoreceptor family protein [Schmidtea mediterranea]
SMESG000076123.1	-1.46853	2.86582e-49	2.51788e-47	Down	rgn	XP_011439356.1 PREDICTED: regucalcin [Crassostrea gigas]
SMESG000076142.1	-2.16203	1.45345e-166	2.31276e-163	Down	--	-
SMESG000076268.1	0.872356	0.0187411	0.0523383	Up	nr2e1	XP_021340935.1 nuclear receptor subfamily 2 group E member 1-like isoform X1 [Mizuhopecten yessoensis]
SMESG000076328.1	-1.80338	2.35156e-84	6.01369e-82	Down	--	-
SMESG000076464.1	-0.968726	1.33304e-20	3.17117e-19	Down	--	XP_028399817.1 sodium-dependent glucose transporter 1A-like [Dendronephthya gigantea]
SMESG000076502.1	-0.817874	0.00694665	0.0223056	Down	NCEH1	KTG45001.1 hypothetical protein cypCar_00018764 [Cyprinus carpio]
SMESG000076513.1	-0.936344	1.34325e-08	1.23233e-07	Down	Nceh1	XP_019358854.1 PREDICTED: neutral cholesterol ester hydrolase 1 [Gavialis gangeticus]
SMESG000076519.1	-0.945232	0.00188503	0.00714734	Down	--	-
SMESG000076526.1	-2.01096	5.43738e-51	5.15687e-49	Down	TMPRSS15	RTG85020.1 uncharacterized protein DC041_0008529 [Schistosoma bovis]
SMESG000076607.1	-2.32828	4.52508e-102	1.90599e-99	Down	SLC8A1	AKN21456.1 slc8a-2 [Schmidtea mediterranea]
SMESG000076636.1	0.935608	1.9312e-26	6.24306e-25	Up	fth1-b	XP_013080834.1 PREDICTED: soma ferritin [Biomphalaria glabrata]
SMESG000076823.1	-2.92434	7.61407e-37	4.14605e-35	Down	TMPRSS15	TNN17107.1 Transmembrane protease serine 11C isoform 2 [Schistosoma japonicum]
SMESG000076927.1	-1.96236	5.00533e-115	2.75697e-112	Down	--	-
SMESG000077040.1	0.839464	6.22838e-14	9.46886e-13	Up	--	AFJ24814.1 hypothetical protein [Schmidtea mediterranea]
SMESG000077134.1	-1.48986	9.62158e-08	7.79359e-07	Down	SLC47A1	AKN21702.1 slc47a-5 [Schmidtea mediterranea]
SMESG000077167.1	1.07958	1.27685e-06	8.88092e-06	Up	HVCN1	CDS41233.1 conserved hypothetical protein [Echinococcus multilocularis]
SMESG000077197.1	0.817695	1.22798e-50	1.15697e-48	Up	CTSC	KRZ55837.1 Dipeptidyl peptidase 1 [Trichinella nativa]
SMESG000077265.1	-1.38605	1.43201e-30	5.61856e-29	Down	--	-
SMESG000077266.1	-1.20395	2.2611e-28	8.05503e-27	Down	--	-
SMESG000077405.1	-1.83949	2.01576e-53	2.07681e-51	Down	RCN1	AAP05891.1 SJCHGC09235 protein [Schistosoma japonicum]
SMESG000077416.1	-2.72741	7.39454e-77	1.35766e-74	Down	--	PAA93900.1 hypothetical protein BOX15_Mlig034563g1 [Macrostomum lignano]
SMESG000077501.1	0.853084	0.000347559	0.00158364	Up	pax6	CAC85262.2 Pax-6B protein [Dugesia japonica]
SMESG000077659.1	0.905602	0.000851075	0.00350741	Up	DUR3	XP_009065706.1 hypothetical protein LOTGIDRAFT_169159 [Lottia gigantea]
SMESG000077660.1	-1.6164	9.90047e-52	9.58004e-50	Down	--	ANO39113.1 GCR158 [Schmidtea mediterranea]
SMESG000077667.1	-2.16379	1.40165e-22	3.80172e-21	Down	--	-
SMESG000077668.1	-1.1855	2.8486e-28	1.00728e-26	Down	--	-
SMESG000077672.1	-2.616	2.19032e-43	1.61689e-41	Down	--	-
SMESG000077674.1	-1.36181	7.60333e-27	2.52054e-25	Down	--	PAA93900.1 hypothetical protein BOX15_Mlig034563g1 [Macrostomum lignano]
SMESG000077726.1	2.44272	6.03118e-17	1.13053e-15	Up	--	XP_011441138.1 PREDICTED: sex peptide receptor isoform X2 [Crassostrea gigas]
SMESG000077907.1	-1.73114	1.31814e-12	1.8047e-11	Down	Rab27b	VDP32161.1 unnamed protein product [Schistosoma mattheei]
SMESG000077918.1	-3.38988	2.90991e-16	5.19611e-15	Down	DHRS11	XP_032362503.1 dehydrogenase/reductase SDR family member 11-like [Etheostoma spectabile]
SMESG000077989.1	0.877582	7.13254e-21	1.73421e-19	Up	hsp70	AJN00640.1 HSP70 [Polycelis sp. ZD-2015]
SMESG000078091.1	-1.00477	4.4144e-33	2.02624e-31	Down	Cyp2b1	QCQ73702.1 P450 2B-like protein [Dugesia japonica]
SMESG000078092.1	-2.41846	7.73716e-13	1.08207e-11	Down	CYP2B11	QCQ73702.1 P450 2B-like protein [Dugesia japonica]
SMESG000078094.1	-1.98936	2.13801e-19	4.67458e-18	Down	CYP2B11	QCQ73702.1 P450 2B-like protein [Dugesia japonica]
SMESG000078126.1	-2.81192	4.13631e-41	2.75517e-39	Down	aca1	XP_019630010.1 PREDICTED: L-azetidine-2-carboxylic acid acetyltransferase-like [Branchiostoma belcheri]
SMESG000078177.1	-1.156	7.00603e-32	2.99503e-30	Down	--	-
SMESG000078255.1	-2.22637	3.07916e-28	1.08346e-26	Down	loxl2a	VDP65370.1 unnamed protein product [Echinostoma caproni]
SMESG000078264.1	1.09356	4.67165e-62	6.43295e-60	Up	impdh2	XP_030314190.1 inosine-5'-monophosphate dehydrogenase 2 isoform X2 [Calypte anna]
SMESG000078272.1	-0.953827	5.74512e-06	3.61017e-05	Down	CAM1	ACH46222.1 putative calmodulin variant 1 [Taeniopygia guttata]
SMESG000078281.1	-2.37881	4.27981e-32	1.85731e-30	Down	--	-
SMESG000078287.1	-0.881661	2.82947e-12	3.76239e-11	Down	Uprt	XP_015792927.1 uracil phosphoribosyltransferase homolog isoform X2 [Tetranychus urticae]
SMESG000078298.1	1.03103	6.39212e-12	8.21738e-11	Up	Pka-R1	PAA86993.1 hypothetical protein BOX15_Mlig018331g2 [Macrostomum lignano]
SMESG000078300.1	1.36764	1.27995e-19	2.84631e-18	Up	GLIS3	ACZ64516.1 GLI-3 [Schmidtea mediterranea]
SMESG000078401.1	-1.90739	5.30725e-26	1.689e-24	Down	Cyp2j3	QCQ73702.1 P450 2B-like protein [Dugesia japonica]
SMESG000078438.1	0.850985	0.0155947	0.0448818	Up	TUBA1B	RJW64916.1 Tubulin alpha chain [Clonorchis sinensis]
SMESG000078459.1	-0.968835	4.62137e-25	1.39626e-23	Down	INHBA	AGC30581.1 activin, partial [Schmidtea mediterranea]
SMESG000078505.1	-1.45975	3.59903e-63	5.20624e-61	Down	CDKL3	XP_020650089.1 cyclin-dependent kinase-like 3 isoform X2 [Pogona vitticeps]
SMESG000078507.1	-2.24572	1.19083e-93	3.70738e-91	Down	CLA4	OMJ89093.1 hypothetical protein SteCoe_8815 [Stentor coeruleus]
SMESG000078509.1	-1.89253	2.91747e-15	4.847e-14	Down	shk2	XP_022820065.1 serine/threonine-protein kinase fused [Spodoptera litura]
SMESG000078545.1	-1.9521	6.23254e-21	1.53098e-19	Down	Cd82	PAA63419.1 hypothetical protein BOX15_Mlig023279g1 [Macrostomum lignano]
SMESG000078588.1	-1.4517	1.3562e-62	1.94221e-60	Down	--	AET43969.1 microsomal GST3, partial [Reishia clavigera]
SMESG000078773.1	-0.905355	5.91815e-42	4.11426e-40	Down	Pnp	XP_006037767.1 purine nucleoside phosphorylase isoform X2 [Alligator sinensis]
SMESG000078787.1	-0.874018	1.91237e-50	1.76691e-48	Down	washc5	XP_009043763.1 hypothetical protein LOTGIDRAFT_180993 [Lottia gigantea]
SMESG000078995.1	-0.846673	2.4064e-05	0.000136375	Down	--	-
SMESG000079004.1	-2.67823	8.4282e-74	1.47195e-71	Down	alphaTub84B	XP_015795966.1 tubulin alpha chain [Tetranychus urticae]
SMESG000079158.1	-1.34638	4.96768e-30	1.9073e-28	Down	Tspo2	XP_009062264.1 hypothetical protein LOTGIDRAFT_210696 [Lottia gigantea]
SMESG000079220.1	-1.21199	4.12803e-05	0.000225726	Down	--	-
SMESG000079287.1	0.836103	0.00515452	0.0172432	Up	--	-
SMESG000079496.1	-1.27871	1.29504e-06	8.98996e-06	Down	--	-
SMESG000079498.1	-0.829561	1.58248e-15	2.6788e-14	Down	--	-
SMESG000079512.1	-2.18431	1.97954e-16	3.5749e-15	Down	DTH-1	Q00400.2 RecName: Full=Homeobox protein DTH-1 [Girardia tigrina]
SMESG000079513.1	-1.41033	5.31364e-24	1.53112e-22	Down	maoA	XP_013070480.1 PREDICTED: probable flavin-containing monoamine oxidase A [Biomphalaria glabrata]
SMESG000079514.1	1.3516	6.13551e-17	1.14585e-15	Up	Gata3	THD22500.1 GATA-binding factor 3 [Fasciola hepatica]
SMESG000079515.1	-0.981995	2.09703e-05	0.000120319	Down	CYP20A1	XP_021373560.1 cytochrome P450 20A1-like [Mizuhopecten yessoensis]
SMESG000079527.1	-0.825349	3.45714e-16	6.13503e-15	Down	--	-
SMESG000079540.1	-3.34321	3.291e-29	1.22099e-27	Down	SLC47A1	AKN21704.1 slc47a-7 [Schmidtea mediterranea]
SMESG000079557.1	-0.993875	4.07975e-05	0.000223256	Down	--	-
SMESG000079606.1	-1.01556	6.09057e-11	7.11444e-10	Down	--	-
SMESG000079648.1	0.816691	7.46217e-05	0.000387195	Up	ptf1a	AGZ94919.1 ptf-4 protein, partial [Schmidtea mediterranea]
SMESG000079650.1	1.12877	8.27188e-71	1.37746e-68	Up	TUB2	ANN83870.1 alpha-tubulin [Patiria miniata]
SMESG000079712.1	-3.63916	1.78288e-104	7.97895e-102	Down	--	C0HKB8.1 RecName: Full=Acidic phospholipase A2; Short=MdumPLA2; Short=svPLA2; AltName: Full=Phosphatidylcholine 2-acylhydrolase [Micrurus dumerilii]
SMESG000079713.1	-2.25519	4.59338e-10	4.92378e-09	Down	haao	XP_004209226.1 PREDICTED: general transcription factor II-I repeat domain-containing protein 2A-like [Hydra vulgaris]
SMESG000079761.1	0.990353	2.81224e-10	3.08851e-09	Up	--	AKQ63011.1 orphan G-protein coupled receptor 1 [Platynereis dumerilii]
SMESG000079774.1	-0.956858	1.13699e-10	1.30263e-09	Down	--	PIK55761.1 putative thiosulfate sulfurtransferase/rhodanese-like domain-containing protein 3 isoform X1 [Apostichopus japonicus]
SMESG000079800.1	0.851753	0.00232332	0.00858861	Up	--	-
SMESG000079847.1	-1.11911	5.17763e-05	0.000277089	Down	--	-
SMESG000080027.1	0.945099	3.96081e-12	5.18964e-11	Up	FLI1	ARX11405.1 friend leukemia integration 1, partial [Schmidtea mediterranea]
SMESG000080129.1	-1.61203	4.2312e-29	1.56576e-27	Down	cof1	CAX70876.1 putative Cofilin-1 [Schistosoma japonicum]
SMESG000080294.1	0.872318	6.30177e-15	1.02322e-13	Up	--	-
SMESG000080447.1	1.43804	1.3379e-07	1.06131e-06	Up	--	-
SMESG000080562.1	-2.0346	4.33989e-79	8.87879e-77	Down	Oca2	XP_013390139.1 P protein-like isoform X1 [Lingula anatina]
SMESG000080786.1	-1.2408	1.88466e-13	2.77107e-12	Down	--	-
SMESG000080870.1	-1.52876	0.000382062	0.0017244	Down	Abca2	CAK78524.1 unnamed protein product [Paramecium tetraurelia]
SMESG000080981.1	-0.889409	0.00155605	0.00603743	Down	--	AFJ24767.1 ephrin receptor A-1, partial [Schmidtea mediterranea]
SMESG000081052.1	0.986201	1.06461e-09	1.09136e-08	Up	--	AFJ24867.1 peptidoglycan recognition protein-1 [Schmidtea mediterranea]
SMESG000081110.1	-2.37369	3.81763e-27	1.27739e-25	Down	HSPA1L	ABJ97377.1 heat shock protein 70 [Pteria penguin]
SMESG000081113.1	-0.844533	1.66052e-50	1.54418e-48	Down	PLS1	VUZ45464.1 unnamed protein product [Hymenolepis diminuta]
SMESG000081126.1	-0.99059	1.19685e-17	2.32881e-16	Down	Lcp1	PAA74866.1 hypothetical protein BOX15_Mlig000734g5 [Macrostomum lignano]
SMESG000081190.1	-1.03869	1.07461e-34	5.21679e-33	Down	PGS1	XP_022313163.1 CDP-diacylglycerol--glycerol-3-phosphate 3-phosphatidyltransferase, mitochondrial-like isoform X1 [Crassostrea virginica]
SMESG000081260.1	0.976945	7.91742e-13	1.1062e-11	Up	RpL3	AQT19783.1 hypothetical protein Smed-rpl3 [Schmidtea mediterranea]
SMESG000081422.1	0.986329	0.00013921	0.000684389	Up	NPY2R	AKQ63065.1 orphan G-protein coupled receptor 59 [Platynereis dumerilii]
SMESG000081585.1	1.73212	1.18456e-08	1.09587e-07	Up	SLC2A4	AKN21398.1 slc2a-3, partial [Schmidtea mediterranea]
SMESG000081649.1	0.991323	3.63706e-06	2.37187e-05	Up	--	-
SMESG000081746.1	1.85959	4.48415e-15	7.35596e-14	Up	--	THD19475.1 hypothetical protein D915_009859 [Fasciola hepatica]
SMESG000081840.1	0.844808	0.00402395	0.0138927	Up	--	-
SMESG000081885.1	0.840765	3.29365e-07	2.49172e-06	Up	DTH-2	AUN27667.1 NK2.1 [Lineus ruber]

## Sheet: CHD4_15dpi_diff_gene
Transcriptome profiling at 15 dpi after depletion of CHD4
Gene_name	log2FoldChange	pvalue	padj	change	Symbol	Description
SMESG000000077.1	-1.65831	2.90074e-09	1.88967e-08	Down	slc22a15	CDS37184.1 synaptic vesicle 2 protein [Echinococcus multilocularis]
SMESG000000110.1	-1.5222	7.58802e-08	4.22014e-07	Down	svopl	OAF72203.1 putative transporter SVOPL [Intoshia linei]
SMESG000000211.1	1.04943	7.18294e-33	1.73846e-31	Up	GLUL	NP_001295770.1 glutamine synthetase 2 cytoplasmic-like [Crassostrea gigas]
SMESG000000218.1	1.23204	0.00103395	0.00323998	Up	nekl-2	AVM18990.1 PIM-1-like protein [Schmidtea mediterranea]
SMESG000000222.1	-0.801468	3.74161e-16	4.23356e-15	Down	--	-
SMESG000000229.1	0.956293	3.22587e-18	4.15054e-17	Up	Gs2	PAA64740.1 hypothetical protein BOX15_Mlig013524g3 [Macrostomum lignano]
SMESG000000273.1	-0.974869	2.97235e-27	5.9484e-26	Down	ABCC1	PAA84816.1 hypothetical protein BOX15_Mlig012583g1 [Macrostomum lignano]
SMESG000000283.1	-1.62412	6.58958e-69	3.43728e-67	Down	ABCC1	PAA84816.1 hypothetical protein BOX15_Mlig012583g1 [Macrostomum lignano]
SMESG000000371.1	-1.03453	0.0245552	0.0548375	Down	Traf3	ADD24555.1 TNF receptor-associated factor 6 [Lepeophtheirus salmonis]
SMESG000000381.1	-3.28189	2.23561e-160	3.40024e-158	Down	--	-
SMESG000000553.1	-0.811744	2.4847e-12	2.12058e-11	Down	CPK4	VDD83930.1 unnamed protein product [Mesocestoides corti]
SMESG000000601.1	-2.02804	1.89302e-44	6.43581e-43	Down	--	XP_011448530.1 PREDICTED: uncharacterized protein LOC105343036 isoform X1 [Crassostrea gigas]
SMESG000000653.1	-0.815248	1.93489e-24	3.41775e-23	Down	PIGG	XP_026479896.1 GPI ethanolamine phosphate transferase 2-like [Ctenocephalides felis]
SMESG000000724.1	-0.971299	2.68932e-16	3.07908e-15	Down	--	PAA62967.1 hypothetical protein BOX15_Mlig026242g1 [Macrostomum lignano]
SMESG000000802.1	1.20625	5.8442e-11	4.4467e-10	Up	LACTB	AQT19774.1 hypothetical protein Smed-lactB [Schmidtea mediterranea]
SMESG000000812.1	1.18229	1.74141e-28	3.684e-27	Up	--	VDO81743.1 unnamed protein product, partial [Schistosoma margrebowiei]
SMESG000000959.1	1.73195	3.76147e-08	2.17572e-07	Up	--	AFJ24724.1 early growth response-3 [Schmidtea mediterranea]
SMESG000000960.1	1.508	1.14262e-08	7.00456e-08	Up	--	AEI69697.1 EGR-like protein 1 [Schmidtea mediterranea]
SMESG000000988.1	-1.27156	6.20262e-15	6.39698e-14	Down	SOAT1	XP_021347209.1 sterol O-acyltransferase 1-like [Mizuhopecten yessoensis]
SMESG000001038.1	-0.805853	0.0184456	0.0428353	Down	Ctdspl	TPP59010.1 CTD small phosphatase protein [Fasciola gigantica]
SMESG000001228.1	0.987702	1.78398e-26	3.40963e-25	Up	--	VUZ45558.1 unnamed protein product [Hymenolepis diminuta]
SMESG000001287.1	-0.989192	5.51082e-33	1.336e-31	Down	Nfat5	PAA82774.1 hypothetical protein BOX15_Mlig002181g3 [Macrostomum lignano]
SMESG000001362.1	-2.64903	4.3101e-24	7.54869e-23	Down	--	XP_006815414.1 PREDICTED: growth factor receptor-bound protein 14-like [Saccoglossus kowalevskii]
SMESG000001565.1	-2.08553	1.73975e-58	7.75854e-57	Down	TRAF3	XP_014346563.1 PREDICTED: TNF receptor-associated factor 3-like isoform X2 [Latimeria chalumnae]
SMESG000001708.1	-1.62742	5.48944e-137	6.50139e-135	Down	ALDH2	TGZ74088.1 hypothetical protein CRM22_001133 [Opisthorchis felineus]
SMESG000001723.1	-1.26124	3.4432e-32	8.15586e-31	Down	ALDH2	TGZ74088.1 hypothetical protein CRM22_001133 [Opisthorchis felineus]
SMESG000001724.1	-1.14768	3.63689e-13	3.31542e-12	Down	ALDH1A1	XP_011302841.1 PREDICTED: aldehyde dehydrogenase, mitochondrial [Fopius arisanus]
SMESG000001725.1	-1.11852	6.12417e-14	5.86791e-13	Down	--	PFX14258.1 putative uncharacterized transposon-derived protein F54H12.3 [Stylophora pistillata]
SMESG000001727.1	-4.00293	5.44183e-123	5.95674e-121	Down	--	-
SMESG000001793.1	1.00044	3.32899e-12	2.80307e-11	Up	--	-
SMESG000001797.1	-1.8383	1.27228e-178	2.45109e-176	Down	--	-
SMESG000002004.1	1.11728	4.79464e-10	3.36954e-09	Up	mx1	XP_007904885.1 PREDICTED: interferon-induced GTP-binding protein Mx-like isoform X2 [Callorhinchus milii]
SMESG000002219.1	1.1811	5.91354e-09	3.7167e-08	Up	mx2	XP_007904885.1 PREDICTED: interferon-induced GTP-binding protein Mx-like isoform X2 [Callorhinchus milii]
SMESG000002416.1	-3.3818	4.49942e-72	2.51985e-70	Down	--	XP_011261479.1 transmembrane channel-like protein 1 [Camponotus floridanus]
SMESG000002559.1	-1.35291	3.79311e-38	1.09177e-36	Down	HAL	XP_002594930.1 hypothetical protein BRAFLDRAFT_209115 [Branchiostoma floridae]
SMESG000002628.1	1.10077	5.10374e-109	4.75767e-107	Up	--	XP_029312114.1 progranulin isoform X4 [Cottoperca gobio]
SMESG000002694.1	-2.00571	2.69339e-20	3.91124e-19	Down	HAL	XP_002594930.1 hypothetical protein BRAFLDRAFT_209115 [Branchiostoma floridae]
SMESG000002831.1	3.08245	6.31041e-155	9.11791e-153	Up	TMPRSS3	XP_013390346.1 bone morphogenetic protein 1 [Lingula anatina]
SMESG000002840.1	-2.75152	3.02291e-279	1.36494e-276	Down	LIPF	KAA3682135.1 lysosomal acid lipase/cholesteryl ester hydrolase [Paragonimus westermani]
SMESG000002849.1	-0.877295	1.82829e-08	1.09071e-07	Down	SMTN	XP_011454278.1 PREDICTED: muscle M-line assembly protein unc-89 isoform X5 [Crassostrea gigas]
SMESG000002858.1	2.5024	1.74269e-83	1.16575e-81	Up	--	XP_018645986.1 acid sensing ion channel 4, pituitary, putative [Schistosoma mansoni]
SMESG000002883.1	-5.31966	7.20512e-97	5.75176e-95	Down	--	-
SMESG000002890.1	-4.64157	2.17058e-166	3.44645e-164	Down	--	XP_009064757.1 hypothetical protein LOTGIDRAFT_168623 [Lottia gigantea]
SMESG000002907.1	-1.17878	7.71044e-17	9.19209e-16	Down	--	-
SMESG000002943.1	-1.01538	4.1749e-33	1.01554e-31	Down	--	-
SMESG000002973.1	-1.92595	2.36239e-56	1.00989e-54	Down	Marf	XP_021004036.1 transmembrane GTPase Marf-like [Parasteatoda tepidariorum]
SMESG000003087.1	-5.65048	1.78505e-303	9.92006e-301	Down	gst-3	AFJ24753.1 glutathione S transferase-1 [Schmidtea mediterranea]
SMESG000003090.1	-1.18379	9.704e-25	1.72464e-23	Down	ATP11B	XP_013406304.1 probable phospholipid-transporting ATPase IF [Lingula anatina]
SMESG000003235.1	0.836584	7.03634e-40	2.12251e-38	Up	Nep3	XP_024891120.1 endothelin-converting enzyme homolog isoform X2 [Temnothorax curvispinosus]
SMESG000003328.1	1.42455	4.09805e-109	3.87012e-107	Up	--	AFJ24714.1 fos-1 [Schmidtea mediterranea]
SMESG000003379.1	1.02689	0.00021771	0.000773468	Up	ama-1	AQT19782.1 hypothetical protein Smed-rpb1 [Schmidtea mediterranea]
SMESG000003392.1	-1.20613	1.54397e-19	2.1659e-18	Down	--	-
SMESG000003402.1	4.17397	2.18608e-72	1.23869e-70	Up	Cyp2u1	AWM96409.1 cytochrome P450 2K1-like protein [Dugesia japonica]
SMESG000003551.1	-0.800815	7.41862e-05	0.00028516	Down	--	-
SMESG000003566.1	-0.884385	2.36545e-20	3.4454e-19	Down	--	AHD24733.1 1.C5.1 [Schmidtea mediterranea]
SMESG000003727.1	-1.12879	6.98937e-07	3.49565e-06	Down	--	KAB0796844.1 hypothetical protein PPYR_10905 [Photinus pyralis]
SMESG000003786.1	-0.806407	2.1854e-15	2.33039e-14	Down	Aga	VDP69692.1 unnamed protein product [Echinostoma caproni]
SMESG000003824.1	1.53353	1.87611e-28	3.96315e-27	Up	--	CDS34628.2 hypothetical transcript [Hymenolepis microstoma]
SMESG000003961.1	-1.20615	8.29861e-06	3.63243e-05	Down	Best1	XP_013416778.1 bestrophin-2 [Lingula anatina]
SMESG000004138.1	0.841951	9.44336e-05	0.000357004	Up	Trpv5	PAA93433.1 hypothetical protein BOX15_Mlig006500g2 [Macrostomum lignano]
SMESG000004200.1	-2.56477	8.57108e-74	4.93401e-72	Down	let-23	ANP44414.1 epidermal growth factor receptor Smed-egfr-2 [Schmidtea mediterranea]
SMESG000004201.1	-2.49281	1.99109e-56	8.53686e-55	Down	V-ERBB	ANP44414.1 epidermal growth factor receptor Smed-egfr-2 [Schmidtea mediterranea]
SMESG000004221.1	1.50131	1.44747e-39	4.31228e-38	Up	ALAD	XP_022085092.1 delta-aminolevulinic acid dehydratase-like [Acanthaster planci]
SMESG000004302.1	0.971437	2.13131e-13	1.98551e-12	Up	--	XP_002422856.1 conserved hypothetical protein [Pediculus humanus corporis]
SMESG000004332.1	-1.0669	1.11312e-40	3.39313e-39	Down	--	XP_013773512.1 NTF2-related export protein 1-like [Limulus polyphemus]
SMESG000004344.1	-1.20426	7.43364e-11	5.60588e-10	Down	Mpc2	XP_013777673.1 mitochondrial pyruvate carrier 2-like [Limulus polyphemus]
SMESG000004626.1	1.31411	9.8808e-10	6.71848e-09	Up	--	-
SMESG000004643.1	0.894818	2.01893e-07	1.07889e-06	Up	5-HT1B	ANO39050.1 GCR083 [Schmidtea mediterranea]
SMESG000004654.1	1.03396	6.33371e-10	4.40403e-09	Up	--	XP_021359597.1 spermatogenesis-associated protein 1-like isoform X3 [Mizuhopecten yessoensis]
SMESG000004806.1	0.883869	0.00101564	0.00318882	Up	azin2	XP_005095259.1 PREDICTED: ornithine decarboxylase-like [Aplysia californica]
SMESG000004815.1	-1.02223	3.01101e-14	2.96162e-13	Down	--	XP_001621535.1 monoglyceride lipase [Nematostella vectensis]
SMESG000004840.1	2.59588	7.90048e-62	3.7063e-60	Up	EGR4	AFJ24725.1 early growth response-2, partial [Schmidtea mediterranea]
SMESG000004884.1	2.0057	1.8341e-10	1.34591e-09	Up	--	-
SMESG000004900.1	-1.30881	4.82406e-26	9.08772e-25	Down	TRPM2	XP_023931219.1 transient receptor potential cation channel subfamily M member 3 [Lingula anatina]
SMESG000004927.1	-1.97364	8.1649e-96	6.41167e-94	Down	--	-
SMESG000005005.1	0.885868	6.86831e-05	0.000265065	Up	--	-
SMESG000005010.1	-1.46043	4.04701e-83	2.65797e-81	Down	RAC1	ELU15297.1 hypothetical protein CAPTEDRAFT_171205 [Capitella teleta]
SMESG000005013.1	-1.69237	8.05031e-50	3.06102e-48	Down	RAC1	TMS36896.1 hypothetical protein L596_003957 [Steinernema carpocapsae]
SMESG000005050.1	-3.07291	4.55717e-193	1.02885e-190	Down	Gaa	ELU15628.1 hypothetical protein CAPTEDRAFT_167453 [Capitella teleta]
SMESG000005054.1	-1.14828	5.57799e-49	2.10435e-47	Down	Gaa	XP_033124429.1 lysosomal alpha-glucosidase-like isoform X1 [Anneissia japonica]
SMESG000005067.1	-0.945216	9.26509e-26	1.72515e-24	Down	Grik2	TGZ73230.1 hypothetical protein CRM22_001648 [Opisthorchis felineus]
SMESG000005069.1	0.950069	2.09028e-44	7.05664e-43	Up	GAA	XP_033124429.1 lysosomal alpha-glucosidase-like isoform X1 [Anneissia japonica]
SMESG000005077.1	-1.25527	3.51707e-11	2.72046e-10	Down	--	-
SMESG000005130.1	0.909399	9.83377e-24	1.69556e-22	Up	--	AHD24754.1 X1.C.D3.1 [Schmidtea mediterranea]
SMESG000005145.1	-0.899161	0.00234027	0.00677918	Down	--	-
SMESG000005286.1	0.93324	6.17577e-24	1.06867e-22	Up	DYNLL2	PAA56115.1 hypothetical protein BOX15_Mlig022175g1 [Macrostomum lignano]
SMESG000005380.1	1.76773	2.49003e-37	6.93226e-36	Up	--	-
SMESG000005418.1	-1.85764	4.50817e-109	4.22978e-107	Down	GNAI3	XP_009050193.1 hypothetical protein LOTGIDRAFT_226384 [Lottia gigantea]
SMESG000005474.1	-3.21766	2.38524e-23	4.03564e-22	Down	SLC47A1	AKN21701.1 slc47a-4, partial [Schmidtea mediterranea]
SMESG000005477.1	-5.58276	2.72251e-111	2.588e-109	Down	slc47a1	AKN21701.1 slc47a-4, partial [Schmidtea mediterranea]
SMESG000005599.1	-2.00582	1.46736e-26	2.81939e-25	Down	SPAC17G8.11c	PAA77440.1 hypothetical protein BOX15_Mlig019369g1 [Macrostomum lignano]
SMESG000005710.1	-0.801531	1.12106e-30	2.55493e-29	Down	Ace	AFJ24765.1 angiotensin converting enzyme-1, partial [Schmidtea mediterranea]
SMESG000005712.1	-1.37283	2.08747e-27	4.19498e-26	Down	Ace	AFJ24765.1 angiotensin converting enzyme-1, partial [Schmidtea mediterranea]
SMESG000005713.1	1.04446	1.36696e-39	4.08929e-38	Up	Ace	AFJ24765.1 angiotensin converting enzyme-1, partial [Schmidtea mediterranea]
SMESG000006008.1	-1.36054	7.54862e-13	6.69963e-12	Down	--	-
SMESG000006014.1	0.803139	0.00832678	0.0212381	Up	PKM	PAA65922.1 hypothetical protein BOX15_Mlig019710g1, partial [Macrostomum lignano]
SMESG000006020.1	-1.42357	3.11866e-10	2.23409e-09	Down	--	-
SMESG000006038.1	-2.38573	7.53593e-44	2.50314e-42	Down	--	AFJ24832.1 hypothetical protein, partial [Schmidtea mediterranea]
SMESG000006040.1	4.97782	4.38228e-104	3.81443e-102	Up	H2AJ	XP_025197454.1 histone H2A [Melanaphis sacchari]
SMESG000006121.1	-1.17079	2.98228e-09	1.93928e-08	Down	--	-
SMESG000006122.1	-1.02298	1.34774e-05	5.73086e-05	Down	--	-
SMESG000006139.1	-2.90955	2.27523e-45	7.94078e-44	Down	--	-
SMESG000006149.1	-2.0149	1.966e-33	4.84757e-32	Down	--	-
SMESG000006609.1	1.04993	0.00219784	0.00640641	Up	--	XP_013413995.1 tyramine receptor tyra-2 [Lingula anatina]
SMESG000006721.1	-1.07704	4.67979e-15	4.88219e-14	Down	Slc7a11	AKN21452.1 slc7a-8 [Schmidtea mediterranea]
SMESG000006948.1	0.951222	7.59194e-28	1.54938e-26	Up	SLC16A14	AKN21509.1 slc16a-14 [Schmidtea mediterranea]
SMESG000007036.1	-0.892372	7.67988e-26	1.44112e-24	Down	atgl-1	THD20264.1 Patatin phospholipase domain-containing protein 2 [Fasciola hepatica]
SMESG000007054.1	1.4777	1.89822e-11	1.5004e-10	Up	--	-
SMESG000007060.1	1.68831	1.73786e-34	4.40533e-33	Up	--	-
SMESG000007063.1	1.23949	0.00157576	0.00476068	Up	--	XP_032238693.1 uncharacterized protein LOC116618741, partial [Nematostella vectensis]
SMESG000007092.1	0.82502	3.99728e-16	4.5193e-15	Up	Tent2	RUS92208.1 hypothetical protein EGW08_000061 [Elysia chlorotica]
SMESG000007145.1	-3.56825	0	0	Down	--	-
SMESG000007159.1	-3.84127	1.42179e-42	4.52498e-41	Down	--	-
SMESG000007179.1	-1.2723	0.000267311	0.000935428	Down	--	GBN64876.1 Transposon Ty3-I Gag-Pol polyprotein [Araneus ventricosus]
SMESG000007194.1	-0.981349	0.000182498	0.000658407	Down	--	-
SMESG000007226.1	0.834788	5.84126e-15	6.04588e-14	Up	--	-
SMESG000007315.1	-1.59589	8.23898e-36	2.18031e-34	Down	--	-
SMESG000007586.1	-0.80707	0.0112568	0.0276899	Down	pim2	XP_026064634.1 serine/threonine-protein kinase pim-2-like [Carassius auratus]
SMESG000007603.1	0.803406	1.41483e-05	5.9985e-05	Up	--	GBN08986.1 hypothetical protein AVEN_19172_1, partial [Araneus ventricosus]
SMESG000007683.1	1.09525	0.00289063	0.00818956	Up	PPM1B	XP_028294831.1 protein phosphatase 1A isoform X4 [Gouania willdenowi]
SMESG000007684.1	1.3779	1.97903e-44	6.69673e-43	Up	--	KAE9546932.1 hypothetical protein FO519_009856, partial [Halicephalobus sp. NKZ332]
SMESG000007685.1	1.8163	1.64319e-08	9.85574e-08	Up	Qars1	XP_014268286.2 glutamine--tRNA ligase [Maylandia zebra]
SMESG000007767.1	-0.976633	0.000696476	0.00226602	Down	LRRC69	XP_025076050.1 leucine-rich repeat-containing protein 69-like [Pomacea canaliculata]
SMESG000007783.1	-1.02058	1.78231e-50	6.86738e-49	Down	egl-4	VUZ54328.1 unnamed protein product [Hymenolepis diminuta]
SMESG000007887.1	-0.955312	2.54518e-31	5.88404e-30	Down	ESF2	RJW71176.1 Pre-rRNA-processing protein esf2 [Clonorchis sinensis]
SMESG000007895.1	-2.69819	2.23121e-18	2.9044e-17	Down	DWF5	XP_013403763.1 7-dehydrocholesterol reductase [Lingula anatina]
SMESG000007909.1	-0.840601	2.42083e-24	4.26049e-23	Down	--	-
SMESG000007955.1	1.08035	7.38998e-68	3.8135e-66	Up	MYLIP	VDM02989.1 unnamed protein product [Schistocephalus solidus]
SMESG000007996.1	2.59288	3.519e-23	5.87816e-22	Up	--	-
SMESG000008004.1	0.936216	5.04038e-43	1.63292e-41	Up	--	-
SMESG000008013.1	-3.24601	1.05506e-36	2.84413e-35	Down	--	-
SMESG000008042.1	-2.07507	3.3448e-207	8.94982e-205	Down	--	PAA59456.1 hypothetical protein BOX15_Mlig034563g2 [Macrostomum lignano]
SMESG000008043.1	-3.61894	1.09207e-171	1.83481e-169	Down	--	PAA47666.1 hypothetical protein BOX15_Mlig027093g2, partial [Macrostomum lignano]
SMESG000008146.1	0.837603	5.63954e-11	4.30004e-10	Up	Atpalpha	BAA32798.1 Na+/K+-ATPase alpha-subunit [Dugesia japonica]
SMESG000008282.1	-0.964276	1.84745e-11	1.46508e-10	Down	--	XP_013417118.1 leucine-rich repeat-containing protein 74B [Lingula anatina]
SMESG000008338.1	-2.79936	1.88773e-44	6.43296e-43	Down	SEC14L2	XP_012940167.1 PREDICTED: SEC14-like protein 2 [Aplysia californica]
SMESG000008535.1	0.845127	0.0188535	0.0436771	Up	bre-4	XP_015174394.1 PREDICTED: beta-1,4-N-acetylgalactosaminyltransferase bre-4-like [Polistes dominula]
SMESG000008561.1	1.81622	1.3164e-27	2.6677e-26	Up	--	AKN21622.1 slc30a-2 [Schmidtea mediterranea]
SMESG000008592.1	0.963762	1.24684e-17	1.56521e-16	Up	--	PAA77042.1 hypothetical protein BOX15_Mlig001380g4 [Macrostomum lignano]
SMESG000008854.1	0.93244	0.00403204	0.0110653	Up	--	ANO39115.1 GCR160 [Schmidtea mediterranea]
SMESG000008878.1	1.45384	7.12527e-10	4.92363e-09	Up	5-HT1B	ANO39050.1 GCR083 [Schmidtea mediterranea]
SMESG000008937.1	-1.00389	1.66066e-20	2.45096e-19	Down	--	XP_013413002.1 uncharacterized protein LOC106175503 [Lingula anatina]
SMESG000009120.1	0.926141	1.09166e-05	4.70167e-05	Up	--	-
SMESG000009254.1	-0.806064	1.24696e-26	2.41844e-25	Down	PAO3	XP_002611699.1 hypothetical protein BRAFLDRAFT_63612 [Branchiostoma floridae]
SMESG000009346.1	-0.961475	0.00898996	0.0226734	Down	--	XP_033120138.1 RPA-interacting protein B-like [Anneissia japonica]
SMESG000009351.1	0.885155	0.00358777	0.00995768	Up	--	-
SMESG000009654.1	-1.07739	2.21924e-72	1.25257e-70	Down	ELOVL4	XP_009061055.1 hypothetical protein LOTGIDRAFT_165788 [Lottia gigantea]
SMESG000009665.1	-1.29576	1.31432e-15	1.42572e-14	Down	ELOVL	XP_029644480.1 elongation of very long chain fatty acids protein AAEL008004-like [Octopus vulgaris]
SMESG000009674.1	-1.0603	4.80829e-11	3.69155e-10	Down	RDH13	XP_017107897.1 PREDICTED: retinol dehydrogenase 12-like [Drosophila bipectinata]
SMESG000009863.1	1.04562	1.64037e-06	7.89266e-06	Up	--	KAA3682369.1 uncharacterized protein DEA37_0006189 [Paragonimus westermani]
SMESG000009872.1	3.28156	7.67826e-28	1.56478e-26	Up	--	KAA0197228.1 Alpha-tocopherol transfer protein [Fasciolopsis buski]
SMESG000009874.1	3.30606	4.77725e-13	4.31415e-12	Up	--	KAA0197228.1 Alpha-tocopherol transfer protein [Fasciolopsis buski]
SMESG000009876.1	-0.92672	2.63841e-38	7.60925e-37	Down	--	KAA0197228.1 Alpha-tocopherol transfer protein [Fasciolopsis buski]
SMESG000009878.1	-2.51652	2.27288e-22	3.65304e-21	Down	--	KAA0197228.1 Alpha-tocopherol transfer protein [Fasciolopsis buski]
SMESG000009904.1	-1.29195	4.14542e-16	4.66489e-15	Down	Slc6a6	AKN21422.1 slc6a-2 [Schmidtea mediterranea]
SMESG000009911.1	-2.01176	2.0745e-103	1.77363e-101	Down	PGGHG	RJW66951.1 Acid trehalase-like protein 1 [Clonorchis sinensis]
SMESG000009913.1	-1.99205	3.42389e-166	5.37737e-164	Down	NAGA	XP_018562147.1 alpha-N-acetylgalactosaminidase [Anoplophora glabripennis]
SMESG000009946.1	1.50828	2.79416e-159	4.20551e-157	Up	SPON1	ARX11404.1 F-spondin, partial [Schmidtea mediterranea]
SMESG000009951.1	-0.960351	0.000195326	0.000700663	Down	TUBA1A	XP_013402431.1 tubulin alpha-1A chain-like isoform X2 [Lingula anatina]
SMESG000009985.1	-0.888617	4.98077e-27	9.8585e-26	Down	Adhfe1	XP_008335662.1 hydroxyacid-oxoacid transhydrogenase, mitochondrial isoform X3 [Cynoglossus semilaevis]
SMESG000009988.1	-0.84855	7.10103e-20	1.01688e-18	Down	--	KAA0197228.1 Alpha-tocopherol transfer protein [Fasciolopsis buski]
SMESG000010063.1	0.914076	4.57726e-25	8.25679e-24	Up	SRY	AFD29619.1 SOXP-1 [Schmidtea mediterranea]
SMESG000010407.1	-3.71608	1.62972e-95	1.26601e-93	Down	Arhgef11	XP_022246497.1 pleckstrin homology domain-containing family G member 5-like isoform X3 [Limulus polyphemus]
SMESG000010434.1	-1.22062	0.000142752	0.000524307	Down	--	XP_011423711.1 PREDICTED: coiled-coil domain-containing protein 92 [Crassostrea gigas]
SMESG000010444.1	-1.06834	4.59239e-12	3.82012e-11	Down	ABCC4	CAD24440.2 novel ABC transporter similar to human multidrug-resistance proteins (MRP) [Danio rerio]
SMESG000010464.1	-2.50565	2.83294e-66	1.41149e-64	Down	--	XP_029652974.1 E3 ubiquitin-protein ligase MIB2-like [Octopus vulgaris]
SMESG000010544.1	-0.875865	3.85424e-07	1.9932e-06	Down	MTFMT	XP_005990184.1 PREDICTED: methionyl-tRNA formyltransferase, mitochondrial isoform X1 [Latimeria chalumnae]
SMESG000010564.1	-1.539	2.14327e-54	8.77282e-53	Down	--	-
SMESG000010599.1	-3.25577	1.10319e-42	3.53435e-41	Down	--	-
SMESG000010604.1	-2.909	3.09799e-37	8.55886e-36	Down	--	-
SMESG000010665.1	1.41816	3.52288e-15	3.70736e-14	Up	--	KAA0188900.1 hypothetical protein FBUS_02218 [Fasciolopsis buski]
SMESG000010795.1	1.39533	4.9844e-19	6.77731e-18	Up	P2RX4	VDN99122.1 unnamed protein product [Rodentolepis nana]
SMESG000010838.1	-0.850257	2.19428e-08	1.30099e-07	Down	--	VEL36651.1 unnamed protein product [Protopolystoma xenopodis]
SMESG000010944.1	-1.45728	2.40598e-19	3.33627e-18	Down	--	-
SMESG000011194.1	1.95419	5.68226e-44	1.89177e-42	Up	--	-
SMESG000011215.1	2.3574	5.64186e-32	1.32768e-30	Up	--	-
SMESG000011261.1	0.871328	8.90255e-26	1.66192e-24	Up	--	-
SMESG000011269.1	0.852349	4.51502e-20	6.51073e-19	Up	--	-
SMESG000011275.1	0.83587	4.69848e-22	7.42762e-21	Up	--	-
SMESG000011276.1	0.920703	1.27189e-07	6.94539e-07	Up	--	-
SMESG000011277.1	0.972473	1.81822e-23	3.0944e-22	Up	--	-
SMESG000011359.1	1.57196	9.01714e-20	1.2849e-18	Up	--	-
SMESG000011680.1	-0.968245	1.50265e-51	5.85224e-50	Down	ABHD4	XP_014768281.1 PREDICTED: abhydrolase domain-containing protein 4-like isoform X2 [Octopus bimaculoides]
SMESG000011684.1	1.38674	4.82897e-11	3.70349e-10	Up	--	-
SMESG000011690.1	-1.18274	8.47638e-44	2.80264e-42	Down	Abhd4	NP_001017287.1 (Lyso)-N-acylphosphatidylethanolamine lipase [Xenopus tropicalis]
SMESG000011782.1	-0.982634	1.32768e-19	1.87341e-18	Down	--	-
SMESG000011846.1	0.875657	1.25339e-08	7.63627e-08	Up	SPAC17G8.11c	PAA52406.1 hypothetical protein BOX15_Mlig010228g2 [Macrostomum lignano]
SMESG000011865.1	-1.17492	2.38638e-44	8.01879e-43	Down	DNPEP	XP_013413903.1 aspartyl aminopeptidase [Lingula anatina]
SMESG000011941.1	-0.835928	9.10749e-26	1.69799e-24	Down	AP3S2	XP_013771980.1 AP-3 complex subunit sigma-2-like [Limulus polyphemus]
SMESG000012127.1	1.95512	4.43847e-143	5.62557e-141	Up	sepA	Q8T2I8.1 RecName: Full=Serine/threonine-protein kinase sepA; AltName: Full=Septase A [Dictyostelium discoideum]
SMESG000012131.1	2.28537	7.05977e-97	5.66703e-95	Up	sepA	Q8T2I8.1 RecName: Full=Serine/threonine-protein kinase sepA; AltName: Full=Septase A [Dictyostelium discoideum]
SMESG000012162.1	-0.902364	0.0197549	0.045423	Down	--	-
SMESG000012317.1	0.88776	6.75951e-43	2.18009e-41	Up	actb	XP_031571867.1 actin, cytoplasmic-like [Actinia tenebrosa]
SMESG000012330.1	-1.30795	3.3272e-23	5.57065e-22	Down	--	-
SMESG000012332.1	0.806286	6.02449e-42	1.89234e-40	Up	actb	XP_031571867.1 actin, cytoplasmic-like [Actinia tenebrosa]
SMESG000012339.1	-1.70237	1.52281e-29	3.34393e-28	Down	--	AYA22141.1 TNF receptor-associated factor 3 [Mytilus coruscus]
SMESG000012534.1	-1.13273	8.02209e-66	3.90274e-64	Down	CYP1A1	XP_019642124.1 PREDICTED: cytochrome P450 1A1-like [Branchiostoma belcheri]
SMESG000012543.1	0.859506	1.13443e-11	9.15208e-11	Up	--	ANC28276.1 epidermal growth factor-8 [Schmidtea mediterranea]
SMESG000012601.1	-1.13399	1.87278e-05	7.81173e-05	Down	--	XP_022331549.1 testis-expressed protein 43-like [Crassostrea virginica]
SMESG000012837.1	1.01242	0.0207143	0.0473054	Up	pros	XP_022331242.1 LOW QUALITY PROTEIN: prospero homeobox protein 1-like [Crassostrea virginica]
SMESG000012972.1	-0.941246	2.52812e-34	6.38616e-33	Down	dstyk	XP_027236014.1 dual serine/threonine and tyrosine protein kinase-like [Penaeus vannamei]
SMESG000012973.1	-1.04345	2.18532e-44	7.3603e-43	Down	DSTYK	PAA55491.1 hypothetical protein BOX15_Mlig027899g3 [Macrostomum lignano]
SMESG000013144.1	1.14905	0.000402891	0.00136338	Up	--	-
SMESG000013579.1	-1.66989	7.5162e-10	5.18384e-09	Down	--	-
SMESG000013604.1	0.971212	1.57657e-09	1.05073e-08	Up	--	-
SMESG000013620.1	0.878714	5.12638e-43	1.65707e-41	Up	GARNL3	THD25806.1 GTPase-activating Rap/Ran-GAP domain protein 3 [Fasciola hepatica]
SMESG000013622.1	-1.6721	1.21718e-55	5.1575e-54	Down	slc5a9	AKN21417.1 slc5a-2 [Schmidtea mediterranea]
SMESG000013676.1	-0.83532	2.25217e-22	3.62379e-21	Down	--	XP_011413118.1 PREDICTED: endophilin-B1 isoform X7 [Crassostrea gigas]
SMESG000013689.1	-4.19422	7.74183e-219	2.28289e-216	Down	slc9a3	AKN21460.1 slc9a-1 [Schmidtea mediterranea]
SMESG000013697.1	-1.87299	5.83701e-87	4.05476e-85	Down	CYP2G1	QCQ73702.1 P450 2B-like protein [Dugesia japonica]
SMESG000013701.1	-0.85075	3.10781e-13	2.84929e-12	Down	CYP2U1	QCQ73702.1 P450 2B-like protein [Dugesia japonica]
SMESG000013712.1	1.45022	1.11487e-67	5.73263e-66	Up	Os12g0109200	PAA90379.1 hypothetical protein BOX15_Mlig018861g1 [Macrostomum lignano]
SMESG000013744.1	-1.21761	0.000921829	0.00292095	Down	--	-
SMESG000013769.1	-1.24667	2.3595e-19	3.27812e-18	Down	CYP3A29	XP_021342534.1 cytochrome P450 3A2-like [Mizuhopecten yessoensis]
SMESG000013770.1	-1.22059	1.05084e-19	1.49152e-18	Down	CYP3A8	AFK08979.1 cytochrome P450 CYP6BQ13, partial [Dastarcus helophoroides]
SMESG000013783.1	-2.0823	1.03974e-57	4.56633e-56	Down	Cyp3a9	AAC52582.1 cytochrome P450 3A9 [Rattus norvegicus]
SMESG000013806.1	0.927202	1.90885e-15	2.04759e-14	Up	--	PAA57067.1 hypothetical protein BOX15_Mlig011619g2 [Macrostomum lignano]
SMESG000013825.1	0.999306	0.00241491	0.00697303	Up	--	KRX25311.1 Gag-Pro-Pol polyprotein [Trichinella nelsoni]
SMESG000013908.1	0.997346	4.22741e-39	1.24912e-37	Up	--	-
SMESG000014107.1	-0.901317	1.22268e-28	2.60185e-27	Down	Bpnt1	XP_013069396.1 PREDICTED: 3'(2'),5'-bisphosphate nucleotidase 1-like [Biomphalaria glabrata]
SMESG000014111.1	-0.849155	1.0799e-29	2.37495e-28	Down	BPNT1	XP_009061610.1 hypothetical protein LOTGIDRAFT_127279 [Lottia gigantea]
SMESG000014122.1	1.31024	2.04885e-12	1.76214e-11	Up	--	XP_031622724.1 signal transducer and transcription activator-like [Contarinia nasturtii]
SMESG000014166.1	-3.76475	0	0	Down	LCP2	AWM96389.1 cathepsin L2 [Dugesia japonica]
SMESG000014167.1	-3.94281	0	0	Down	LCP2	AWM96389.1 cathepsin L2 [Dugesia japonica]
SMESG000014251.1	-0.951388	3.93353e-09	2.51819e-08	Down	--	-
SMESG000014298.1	0.934612	8.82411e-66	4.27851e-64	Up	--	XP_012794507.1 Microtubule-associated protein 1A [Schistosoma haematobium]
SMESG000014306.1	1.13502	0.00491898	0.0132207	Up	fli1	XP_022341163.1 LOW QUALITY PROTEIN: transcriptional regulator Erg-like [Crassostrea virginica]
SMESG000014399.1	-3.17785	1.02627e-59	4.67778e-58	Down	--	OMJ70210.1 hypothetical protein SteCoe_31865 [Stentor coeruleus]
SMESG000014523.1	-2.60243	2.72823e-15	2.89642e-14	Down	--	-
SMESG000014542.1	-2.82161	1.01579e-56	4.43417e-55	Down	--	-
SMESG000014544.1	-2.53586	2.98765e-25	5.45746e-24	Down	--	-
SMESG000014566.1	-2.34598	2.60432e-12	2.21482e-11	Down	--	-
SMESG000014588.1	-1.08464	6.985e-75	4.11944e-73	Down	HNF4G	AFF18489.1 HNF4 [Schmidtea mediterranea]
SMESG000014613.1	-0.858519	4.18644e-25	7.5707e-24	Down	MEKK1b	XP_026809523.1 serine/threonine-protein kinase PAK 2 isoform X2 [Rhopalosiphum maidis]
SMESG000014680.1	1.04045	0.00189997	0.0056155	Up	--	-
SMESG000014700.1	0.857487	6.43588e-20	9.23456e-19	Up	--	KAA3680855.1 TNF receptor-associated factor 4 [Paragonimus westermani]
SMESG000014702.1	-1.08434	3.60114e-13	3.2849e-12	Down	--	ADF47430.1 TNF receptor-associated factor-2-like protein B [Dugesia japonica]
SMESG000014705.1	-0.910722	4.13507e-21	6.28923e-20	Down	--	-
SMESG000014710.1	-4.0982	0	0	Down	--	-
SMESG000014711.1	-3.44145	3.8174e-77	2.33719e-75	Down	--	-
SMESG000014712.1	-0.886091	0.00119024	0.00369209	Down	--	XP_020913585.1 TNF receptor-associated factor 6 isoform X2 [Exaiptasia pallida]
SMESG000014753.1	0.846991	3.23909e-30	7.27864e-29	Up	Marf	VVC36185.1 Dynamin superfamily,Fzo/mitofusin HR2 domain,P-loop containing nucleoside triphosphate hydrolase,Dynamin- [Cinara cedri]
SMESG000014754.1	0.932112	1.27953e-22	2.07496e-21	Up	Mfn1	KFM65406.1 Transmembrane GTPase Marf, partial [Stegodyphus mimosarum]
SMESG000014759.1	2.25198	5.00834e-30	1.11675e-28	Up	Marf	XP_019894310.1 PREDICTED: transmembrane GTPase Marf isoform X3 [Musca domestica]
SMESG000014761.1	2.3659	3.26482e-92	2.4068e-90	Up	--	KFM65406.1 Transmembrane GTPase Marf, partial [Stegodyphus mimosarum]
SMESG000014762.1	2.7705	1.32835e-139	1.61288e-137	Up	--	ODM94964.1 Transmembrane GTPase Marf [Orchesella cincta]
SMESG000014768.1	-1.45136	3.6343e-11	2.80813e-10	Down	--	-
SMESG000014780.1	-1.78251	2.30617e-07	1.22103e-06	Down	--	XP_011403816.1 PREDICTED: TNF receptor-associated factor 4-like [Amphimedon queenslandica]
SMESG000014794.1	0.820295	3.06049e-09	1.98657e-08	Up	--	CDS28458.1 protein mcm10 [Hymenolepis microstoma]
SMESG000014962.1	-0.808248	0.0408894	0.0849965	Down	pkaC	XP_015798803.1 PREDICTED: serine/threonine-protein kinase N2-like [Nothobranchius furzeri]
SMESG000014992.1	-0.842787	0.0278874	0.0610708	Down	--	-
SMESG000015079.1	-0.845921	0.000151672	0.000554814	Down	--	-
SMESG000015083.1	-1.43575	3.27134e-25	5.9531e-24	Down	--	-
SMESG000015117.1	0.990513	0.00897771	0.0226465	Up	--	KAF2354160.1 hypothetical protein FHG87_015087, partial [Trinorchestia longiramus]
SMESG000015162.1	-1.92557	5.14274e-199	1.25945e-196	Down	MCOLN3	BAP40094.1 transient receptor potential ion channel ML a, partial [Dugesia japonica]
SMESG000015393.1	-0.920253	7.7944e-08	4.33159e-07	Down	--	RJW65758.1 Ataxin-7-like protein 3 [Clonorchis sinensis]
SMESG000015405.1	1.80695	4.41871e-08	2.53659e-07	Up	PPP4C	XP_015433781.1 PREDICTED: serine/threonine-protein phosphatase 4 catalytic subunit [Dufourea novaeangliae]
SMESG000015446.1	-1.16729	7.90354e-08	4.39055e-07	Down	mug185	XP_026991901.1 dnaJ homolog subfamily C member 24 [Tachysurus fulvidraco]
SMESG000015619.1	-0.934858	4.68569e-21	7.10426e-20	Down	trc	XP_012800450.1 Serine/threonine-protein kinase 38-like [Schistosoma haematobium]
SMESG000015806.1	-1.87877	5.83027e-16	6.47514e-15	Down	--	-
SMESG000015831.1	-1.97101	4.16014e-135	4.80879e-133	Down	SRC	THD23481.1 Proto-oncogene tyrosine-protein kinase Yrk [Fasciola hepatica]
SMESG000015886.1	-0.808717	5.06568e-23	8.36503e-22	Down	slc44a4	AKN21692.1 slc44a-3 [Schmidtea mediterranea]
SMESG000016036.1	-1.04778	6.15145e-29	1.31873e-27	Down	rab-11.1	KAF0979410.1 hypothetical protein FDP41_001753 [Naegleria fowleri]
SMESG000016088.1	-4.88541	0	0	Down	PRSS12	PAA71212.1 hypothetical protein BOX15_Mlig019787g1 [Macrostomum lignano]
SMESG000016089.1	-5.14179	0	0	Down	PRSS12	PAA71212.1 hypothetical protein BOX15_Mlig019787g1 [Macrostomum lignano]
SMESG000016189.1	-2.73904	6.0079e-208	1.63789e-205	Down	tmem41aa	XP_014681253.1 PREDICTED: transmembrane protein 41A-like [Priapulus caudatus]
SMESG000016195.1	-0.988258	7.73121e-60	3.53507e-58	Down	Aldh2	QFQ66890.1 ALDH2-like protein [Schmidtea mediterranea]
SMESG000016213.1	-4.03927	4.36573e-71	2.3985e-69	Down	NAGA	XP_973373.1 PREDICTED: alpha-N-acetylgalactosaminidase isoform X2 [Tribolium castaneum]
SMESG000016252.1	-0.91878	7.65589e-34	1.90396e-32	Down	mtap	XP_021359797.1 S-methyl-5'-thioadenosine phosphorylase-like [Mizuhopecten yessoensis]
SMESG000016261.1	-2.05974	3.98545e-39	1.18004e-37	Down	Gucy1b2	QFQ66871.1 gucy1b2 protein [Schmidtea mediterranea]
SMESG000016284.1	-3.61905	2.40158e-71	1.33463e-69	Down	pkaC	XP_023233184.1 cAMP-dependent protein kinase catalytic subunit beta-like isoform X1 [Centruroides sculpturatus]
SMESG000016293.1	-0.983257	5.4517e-27	1.07759e-25	Down	--	-
SMESG000016297.1	-1.12218	7.53778e-66	3.67951e-64	Down	Best2	PAA75942.1 hypothetical protein BOX15_Mlig030079g1 [Macrostomum lignano]
SMESG000016373.1	-1.94652	5.96536e-12	4.90851e-11	Down	--	-
SMESG000016389.1	-2.28653	1.29237e-178	2.45704e-176	Down	--	XP_022090273.1 ribonuclease Oy-like isoform X1 [Acanthaster planci]
SMESG000016407.1	-2.56622	1.4242e-46	5.06855e-45	Down	--	XP_021351011.1 uncharacterized protein LOC110448862 isoform X2 [Mizuhopecten yessoensis]
SMESG000016412.1	1.15378	1.52707e-30	3.46385e-29	Up	slc25a30	AKN21592.1 slc25a-24 [Schmidtea mediterranea]
SMESG000016720.1	-2.8816	4.16972e-66	2.0633e-64	Down	Nucb2	XP_031151094.1 nucleobindin-2 [Sander lucioperca]
SMESG000016757.1	1.05179	9.45382e-10	6.44028e-09	Up	--	-
SMESG000016771.1	2.23943	1.35156e-45	4.75151e-44	Up	--	-
SMESG000016772.1	2.33131	1.15107e-73	6.59993e-72	Up	--	-
SMESG000016777.1	2.42307	1.17705e-42	3.76264e-41	Up	--	-
SMESG000016778.1	1.77451	2.97283e-39	8.8202e-38	Up	--	-
SMESG000016779.1	1.77838	1.00305e-28	2.14078e-27	Up	--	-
SMESG000016780.1	1.87822	3.38471e-82	2.19308e-80	Up	--	-
SMESG000016782.1	2.14521	8.62796e-49	3.2465e-47	Up	--	-
SMESG000016789.1	2.09888	2.07344e-18	2.70633e-17	Up	--	-
SMESG000016792.1	0.874726	2.72283e-16	3.11497e-15	Up	--	-
SMESG000016810.1	2.37441	2.25585e-67	1.15584e-65	Up	--	-
SMESG000016811.1	1.83041	3.24109e-48	1.20387e-46	Up	--	-
SMESG000016812.1	1.16321	2.73505e-33	6.69809e-32	Up	--	-
SMESG000016829.1	-1.08936	6.88347e-29	1.47129e-27	Down	HSD17B14	XP_025086573.1 17-beta-hydroxysteroid dehydrogenase 14-like [Pomacea canaliculata]
SMESG000016853.1	-0.865621	4.34472e-16	4.88156e-15	Down	PRMT3	XP_013403420.1 protein arginine N-methyltransferase 3 isoform X2 [Lingula anatina]
SMESG000016872.1	-0.884807	6.42626e-07	3.22855e-06	Down	rskn-1	OMJ72106.1 hypothetical protein SteCoe_29537 [Stentor coeruleus]
SMESG000016874.1	0.885358	1.19219e-09	8.04576e-09	Up	--	-
SMESG000016936.1	1.2293	5.4014e-21	8.16368e-20	Up	CASP3	QDF63032.1 caspase-3C [Dugesia japonica]
SMESG000016956.1	1.04903	9.86933e-05	0.000371844	Up	--	-
SMESG000016995.1	1.6003	1.06811e-26	2.07994e-25	Up	--	XP_025083284.1 saxiphilin-like [Pomacea canaliculata]
SMESG000017013.1	-3.78852	0	0	Down	--	-
SMESG000017017.1	1.42598	8.87334e-12	7.21908e-11	Up	Gnai1	KAA0195151.1 Guanine nucleotide binding protein (G protein) alpha inhibiting activity polypeptide [Fasciolopsis buski]
SMESG000017018.1	1.08902	1.53843e-21	2.38506e-20	Up	--	-
SMESG000017042.1	-0.921717	2.74807e-08	1.6141e-07	Down	--	XP_009066209.1 hypothetical protein LOTGIDRAFT_133974, partial [Lottia gigantea]
SMESG000017098.1	-1.55074	4.87647e-27	9.67859e-26	Down	--	-
SMESG000017126.1	-1.77037	1.41776e-07	7.70992e-07	Down	--	-
SMESG000017135.1	-1.74495	2.64e-46	9.37232e-45	Down	--	-
SMESG000017139.1	-0.9564	7.33743e-34	1.8279e-32	Down	--	XP_030840271.1 ADP-ribosylation factor-like protein 6-interacting protein 1 isoform X1 [Strongylocentrotus purpuratus]
SMESG000017142.1	-1.586	3.54068e-42	1.11946e-40	Down	Nucb2	ASK86275.1 nucleobindin nesfatin precursor, partial [Ophionotus victoriae]
SMESG000017171.1	0.871474	1.16912e-08	7.16091e-08	Up	CA7	XP_027699781.1 carbonic anhydrase 6 [Vombatus ursinus]
SMESG000017176.1	0.828827	2.79532e-13	2.58246e-12	Up	PTPRG	TRY76000.1 hypothetical protein DNTS_010902 [Danionella translucida]
SMESG000017178.1	-1.05131	4.1971e-19	5.73737e-18	Down	cahz	TPP63755.1 Carbonic anhydrase XII [Fasciola gigantica]
SMESG000017201.1	-0.850112	1.6266e-25	3.00162e-24	Down	PCYT2	PAA82913.1 hypothetical protein BOX15_Mlig034139g1 [Macrostomum lignano]
SMESG000017203.1	-2.26491	1.63279e-88	1.13972e-86	Down	--	VDN98900.1 unnamed protein product [Rodentolepis nana]
SMESG000017211.1	-1.83602	9.40015e-93	7.00117e-91	Down	ANP2	XP_023801697.1 serine/threonine-protein kinase PAK 3-like [Cyanistes caeruleus]
SMESG000017214.1	-1.70827	1.81431e-56	7.80206e-55	Down	--	KAA3676080.1 uncharacterized protein DEA37_0012169 [Paragonimus westermani]
SMESG000017233.1	-0.980715	5.0188e-05	0.000197491	Down	--	-
SMESG000017252.1	-0.806702	6.10848e-30	1.35787e-28	Down	--	CAK67753.1 unnamed protein product [Paramecium tetraurelia]
SMESG000017253.1	-0.810645	4.05485e-21	6.17371e-20	Down	--	PAA87491.1 hypothetical protein BOX15_Mlig004334g2 [Macrostomum lignano]
SMESG000017270.1	-0.848254	1.37968e-07	7.51131e-07	Down	--	-
SMESG000017274.1	-0.805887	2.03897e-12	1.75468e-11	Down	Map3k3	AKN21681.1 slc42a-1 [Schmidtea mediterranea]
SMESG000017276.1	-0.941773	6.31854e-23	1.03982e-21	Down	--	-
SMESG000017306.1	-1.04345	5.825e-17	7.01378e-16	Down	FAIM	XP_013392071.1 fas apoptotic inhibitory molecule 1 isoform X1 [Lingula anatina]
SMESG000017517.1	-1.25656	1.80861e-18	2.36494e-17	Down	MACF1	XP_019922392.1 PREDICTED: microtubule-actin cross-linking factor 1, isoforms 1/2/3/5 isoform X8 [Crassostrea gigas]
SMESG000017519.1	-1.29618	5.21887e-73	2.96879e-71	Down	--	XP_013080792.1 PREDICTED: microtubule-actin cross-linking factor 1-like isoform X1 [Biomphalaria glabrata]
SMESG000017520.1	-1.23178	2.77729e-23	4.6716e-22	Down	--	-
SMESG000017523.1	0.944122	0.0191174	0.0442033	Up	--	-
SMESG000017675.1	0.935986	3.31776e-37	9.14854e-36	Up	PKM	PAA48731.1 hypothetical protein BOX15_Mlig023525g1 [Macrostomum lignano]
SMESG000017678.1	0.828508	2.39785e-06	1.13113e-05	Up	--	AGS83418.1 asic [Schmidtea mediterranea]
SMESG000017801.1	-3.91054	8.46187e-176	1.50945e-173	Down	--	-
SMESG000017804.1	-3.72177	5.81502e-29	1.24846e-27	Down	--	-
SMESG000017971.1	1.48773	0.0207495	0.0473707	Up	--	-
SMESG000017994.1	-1.26656	0.000625959	0.00204951	Down	tctex1d1-b	XP_013403350.1 tctex1 domain-containing protein 2-like [Lingula anatina]
SMESG000018025.1	1.6199	3.70253e-19	5.08534e-18	Up	--	-
SMESG000018026.1	1.10078	2.29294e-05	9.45243e-05	Up	--	-
SMESG000018042.1	-2.30621	1.27424e-47	4.66116e-46	Down	oxlT	AKN21500.1 slc16a-5, partial [Schmidtea mediterranea]
SMESG000018052.1	-2.11044	3.39114e-15	3.57393e-14	Down	tctex1d1-b	XP_013403350.1 tctex1 domain-containing protein 2-like [Lingula anatina]
SMESG000018135.1	-1.5896	1.55547e-19	2.17781e-18	Down	--	-
SMESG000018320.1	0.830106	0.0024158	0.00697422	Up	--	XP_029206966.1 uncharacterized protein LOC114970654 [Acropora millepora]
SMESG000018362.1	0.845723	0.0039399	0.0108392	Up	--	PAA54835.1 hypothetical protein BOX15_Mlig011694g1 [Macrostomum lignano]
SMESG000018404.1	1.60713	2.62905e-17	3.2357e-16	Up	TRAF5	ADF47430.1 TNF receptor-associated factor-2-like protein B [Dugesia japonica]
SMESG000018453.1	2.63962	2.1346e-12	1.8337e-11	Up	Plg	AFJ24868.1 plasminogen-1, partial [Schmidtea mediterranea]
SMESG000018472.1	-3.79575	6.23585e-121	6.62514e-119	Down	--	-
SMESG000018616.1	-1.07577	0.00685215	0.0178358	Down	--	-
SMESG000018619.1	0.919456	0.0142408	0.0340164	Up	--	PAA76351.1 hypothetical protein BOX15_Mlig022661g2 [Macrostomum lignano]
SMESG000018621.1	0.807604	3.20878e-22	5.11741e-21	Up	--	QFQ66891.1 PXDN-like protein [Schmidtea mediterranea]
SMESG000018637.1	0.851067	4.81365e-05	0.00018997	Up	--	VDD83153.1 unnamed protein product [Mesocestoides corti]
SMESG000018671.1	1.02025	4.05108e-19	5.54826e-18	Up	OtopLc	TGZ60057.1 hypothetical protein CRM22_008757 [Opisthorchis felineus]
SMESG000018708.1	-4.49024	1.66026e-92	1.23021e-90	Down	--	PAA47753.1 hypothetical protein BOX15_Mlig014729g1 [Macrostomum lignano]
SMESG000018758.1	-0.969569	8.55589e-20	1.22158e-18	Down	Sdr16c6	XP_013380984.1 epidermal retinol dehydrogenase 2 isoform X1 [Lingula anatina]
SMESG000018759.1	-1.55745	2.77887e-21	4.28059e-20	Down	Hsd17b13	XP_013380984.1 epidermal retinol dehydrogenase 2 isoform X1 [Lingula anatina]
SMESG000018760.1	1.18739	7.36085e-51	2.85139e-49	Up	--	XP_022310727.1 uncharacterized protein ZC84.1-like isoform X10 [Crassostrea virginica]
SMESG000018810.1	1.03666	7.91639e-13	7.0042e-12	Up	CHRM5	ANO38997.1 GCR015 [Schmidtea mediterranea]
SMESG000018862.1	-1.42976	5.19227e-39	1.52486e-37	Down	PTPN1	NP_001017121.2 tyrosine-protein phosphatase non-receptor type 1 [Xenopus tropicalis]
SMESG000018900.1	-1.69453	5.76969e-24	1.00079e-22	Down	--	-
SMESG000019281.1	-1.70519	1.53945e-18	2.0203e-17	Down	TRAF3	XP_003387035.1 PREDICTED: TNF receptor-associated factor 3-like [Amphimedon queenslandica]
SMESG000019381.1	-1.29927	3.51577e-123	3.87781e-121	Down	Fkbp15	XP_028312149.1 FK506-binding protein 15 isoform X3 [Gouania willdenowi]
SMESG000019504.1	-1.43446	1.34834e-12	1.17717e-11	Down	SLC11A2	AKN21474.1 slc11a-1 [Schmidtea mediterranea]
SMESG000019511.1	-1.72213	1.58242e-08	9.51096e-08	Down	Mvl	AKN21474.1 slc11a-1 [Schmidtea mediterranea]
SMESG000019737.1	0.838236	1.64734e-06	7.91832e-06	Up	tdc-1	ELU11164.1 hypothetical protein CAPTEDRAFT_119245 [Capitella teleta]
SMESG000019751.1	-1.11557	6.25858e-15	6.45009e-14	Down	CAC	VZH93019.1 unnamed protein product [Sparganum proliferum]
SMESG000019783.1	-1.22325	2.98011e-37	8.26479e-36	Down	--	-
SMESG000019836.1	-0.806823	4.26357e-27	8.49715e-26	Down	PSAT1	XP_019617740.1 PREDICTED: phosphoserine aminotransferase-like [Branchiostoma belcheri]
SMESG000019862.1	-0.822214	2.54425e-05	0.000104082	Down	tyrS	XP_026813381.1 tyrosine--tRNA ligase, cytoplasmic [Rhopalosiphum maidis]
SMESG000019976.1	-1.50785	3.81696e-21	5.82995e-20	Down	--	VDM18769.1 unnamed protein product [Hydatigera taeniaeformis]
SMESG000019977.1	1.69067	3.1962e-171	5.24795e-169	Up	--	KTG41371.1 hypothetical protein cypCar_00016186 [Cyprinus carpio]
SMESG000019984.1	-1.9894	0	0	Down	--	-
SMESG000019986.1	1.09905	2.65621e-18	3.4483e-17	Up	--	XP_022699010.1 uncharacterized protein LOC111266096 isoform X4 [Varroa jacobsoni]
SMESG000020012.1	-1.10017	0.001167	0.00362778	Down	--	AHD24730.1 X1.C4.1 [Schmidtea mediterranea]
SMESG000020135.1	-1.4924	2.2887e-118	2.3621e-116	Down	Traf3	XP_032903252.1 TNF receptor-associated factor 2-like [Amblyraja radiata]
SMESG000020144.1	1.14741	4.69625e-52	1.86418e-50	Up	--	-
SMESG000020158.1	0.965001	3.60732e-21	5.52727e-20	Up	--	VDL90377.1 unnamed protein product [Schistocephalus solidus]
SMESG000020236.1	-1.21415	6.88483e-08	3.85577e-07	Down	TMT1	XP_022096077.1 putative methyltransferase DDB_G0268948 isoform X3 [Acanthaster planci]
SMESG000020242.1	1.2906	0.000150554	0.00055128	Up	RORA	CDS27504.1 nuclear receptor 2DBD gamma [Hymenolepis microstoma]
SMESG000020289.1	1.02766	6.52079e-35	1.67649e-33	Up	fyn	TNN07763.1 Tyrosine-protein kinase Fyn isoform 1 [Schistosoma japonicum]
SMESG000020470.1	-2.03354	3.90895e-92	2.86703e-90	Down	Cyp2j6	QCQ73702.1 P450 2B-like protein [Dugesia japonica]
SMESG000020475.1	-0.951064	1.10599e-08	6.78287e-08	Down	FAM102B	VDP33269.1 unnamed protein product [Schistosoma curassoni]
SMESG000020517.1	-3.64475	7.33124e-40	2.20686e-38	Down	--	-
SMESG000020709.1	1.9352	4.45752e-76	2.68361e-74	Up	Trpc2	PAA54089.1 hypothetical protein BOX15_Mlig025367g1 [Macrostomum lignano]
SMESG000020729.1	1.19961	3.47913e-18	4.46844e-17	Up	--	-
SMESG000020731.1	1.43248	0.000137355	0.000505387	Up	--	-
SMESG000020864.1	-1.19063	1.73983e-06	8.3379e-06	Down	--	XP_005929372.1 PREDICTED: lipopolysaccharide-induced tumor necrosis factor-alpha factor homolog isoform X2 [Haplochromis burtoni]
SMESG000020869.1	-0.919012	1.27381e-15	1.38386e-14	Down	--	XP_013866844.1 PREDICTED: cell death-inducing p53-target protein 1-like isoform X2 [Austrofundulus limnaeus]
SMESG000020883.1	0.876394	9.30671e-08	5.12863e-07	Up	--	-
SMESG000020889.1	-2.68118	7.47687e-148	9.8212e-146	Down	--	-
SMESG000020910.1	-1.08846	8.47511e-13	7.476e-12	Down	SLC22A6	AKN21554.1 slc22a-6 [Schmidtea mediterranea]
SMESG000020949.1	0.81482	1.32126e-26	2.5591e-25	Up	--	-
SMESG000020952.1	-2.24538	3.05845e-95	2.35061e-93	Down	--	VDQ11758.1 unnamed protein product [Trichobilharzia regenti]
SMESG000020954.1	-1.75334	2.13679e-11	1.6807e-10	Down	--	VEL28591.1 unnamed protein product [Protopolystoma xenopodis]
SMESG000020955.1	-5.41418	3.21765e-252	1.22347e-249	Down	--	VDQ11758.1 unnamed protein product [Trichobilharzia regenti]
SMESG000021034.1	-1.06315	0.00483513	0.0130195	Down	--	-
SMESG000021283.1	-1.07143	3.07199e-28	6.43292e-27	Down	l3hypdh	XP_013406160.1 trans-L-3-hydroxyproline dehydratase-like [Lingula anatina]
SMESG000021388.1	-1.52847	1.25291e-51	4.89279e-50	Down	--	-
SMESG000021419.1	-1.1336	3.78146e-28	7.90713e-27	Down	Mogat2	XP_011426483.1 PREDICTED: 2-acylglycerol O-acyltransferase 2-A [Crassostrea gigas]
SMESG000021439.1	-2.94512	4.78266e-39	1.40743e-37	Down	--	-
SMESG000021746.1	0.990178	4.89884e-71	2.68119e-69	Up	pat-2	APD13823.1 alpha-int-2, partial [Schmidtea mediterranea]
SMESG000021782.1	-1.35463	7.92502e-55	3.28105e-53	Down	--	-
SMESG000021912.1	-4.15267	2.4288e-221	7.62907e-219	Down	--	XP_015351526.1 PREDICTED: COX assembly mitochondrial protein 2 homolog isoform X1 [Marmota marmota marmota]
SMESG000022030.1	-1.60071	2.50987e-79	1.58363e-77	Down	Ephx4	XP_013388618.1 epoxide hydrolase 4 [Lingula anatina]
SMESG000022049.1	-2.11818	1.19866e-89	8.4899e-88	Down	--	-
SMESG000022050.1	1.5319	4.13371e-95	3.16021e-93	Up	--	-
SMESG000022051.1	-2.01304	1.98126e-95	1.53086e-93	Down	ada	XP_013390246.2 adenosine deaminase-like isoform X1 [Lingula anatina]
SMESG000022068.1	-0.808905	2.53725e-05	0.000103855	Down	FGFR1	CRL07509.1 CLUMA_CG020474, isoform B [Clunio marinus]
SMESG000022101.1	-1.26236	0.000140211	0.000515367	Down	Cyp2b19	AWM96409.1 cytochrome P450 2K1-like protein [Dugesia japonica]
SMESG000022115.1	-1.35643	3.99049e-10	2.82363e-09	Down	--	-
SMESG000022121.1	0.81923	5.70222e-10	3.98218e-09	Up	--	PAA58521.1 hypothetical protein BOX15_Mlig024983g1 [Macrostomum lignano]
SMESG000022139.1	-2.4693	6.50479e-155	9.30572e-153	Down	--	-
SMESG000022278.1	-1.72008	2.40688e-30	5.42542e-29	Down	Trhde	AFJ24858.1 hypothetical protein, partial [Schmidtea mediterranea]
SMESG000022279.1	-1.70065	1.45538e-26	2.8001e-25	Down	ANPEP	AFJ24858.1 hypothetical protein, partial [Schmidtea mediterranea]
SMESG000022356.1	0.906196	9.87289e-12	7.99627e-11	Up	TFAP2A	AFJ24713.1 ap2 [Schmidtea mediterranea]
SMESG000022377.1	-0.851955	3.27616e-14	3.21803e-13	Down	--	PAA91517.1 hypothetical protein BOX15_Mlig006934g1 [Macrostomum lignano]
SMESG000022393.1	0.882349	6.29927e-05	0.000245134	Up	--	-
SMESG000022409.1	-1.29115	0.00199131	0.00585758	Down	--	-
SMESG000022410.1	-1.25437	1.55136e-15	1.67281e-14	Down	--	-
SMESG000022577.1	1.92303	6.2075e-92	4.52991e-90	Up	Thsd7a	RTG89782.1 uncharacterized protein DC041_0003935 [Schistosoma bovis]
SMESG000022739.1	-1.49276	1.93576e-11	1.52924e-10	Down	GGACT	RVE42378.1 hypothetical protein evm_012999 [Chilo suppressalis]
SMESG000022742.1	3.46837	1.58494e-76	9.58192e-75	Up	--	-
SMESG000022744.1	0.816568	0.00859663	0.0218147	Up	--	ANO39078.1 GCR117 [Schmidtea mediterranea]
SMESG000022751.1	-1.06683	1.3273e-36	3.57135e-35	Down	CYP2U1	QCQ73702.1 P450 2B-like protein [Dugesia japonica]
SMESG000022809.1	-1.96906	6.88321e-74	3.9942e-72	Down	SLC8B1	AKN21565.1 slc24a-5 [Schmidtea mediterranea]
SMESG000022839.1	-5.53109	1.51197e-237	4.9651e-235	Down	--	-
SMESG000022842.1	1.07948	4.79165e-07	2.44386e-06	Up	--	-
SMESG000022850.1	0.885696	7.68133e-47	2.74722e-45	Up	--	-
SMESG000022856.1	-3.71059	1.04205e-75	6.1961e-74	Down	lhx1a	XP_022803726.1 LOW QUALITY PROTEIN: LIM/homeobox protein Lhx1-like [Stylophora pistillata]
SMESG000022857.1	-1.55228	6.31097e-105	5.56019e-103	Down	Sgk3	XP_029649968.1 serine/threonine-protein kinase Sgk1-like isoform X4 [Octopus vulgaris]
SMESG000022910.1	0.806532	0.0169063	0.0396492	Up	TACR3	ANO39125.1 GCR402 [Schmidtea mediterranea]
SMESG000022911.1	1.60289	4.058e-13	3.68767e-12	Up	F_48D10.1	ANO39033.1 GCR060 [Schmidtea mediterranea]
SMESG000022915.1	0.842447	0.0102517	0.0255171	Up	mGluR	ANO39069.1 GCR106 [Schmidtea mediterranea]
SMESG000023002.1	2.06884	3.59242e-10	2.55825e-09	Up	--	RXG73896.1 Myosin-M heavy chain [Armadillidium vulgare]
SMESG000023063.1	-1.50482	5.47334e-71	2.98431e-69	Down	Pdlim5	VDP17669.1 unnamed protein product [Schistosoma margrebowiei]
SMESG000023088.1	-1.31601	4.46619e-16	5.01414e-15	Down	--	XP_014790348.1 PREDICTED: uncharacterized protein RP688-like [Octopus bimaculoides]
SMESG000023112.1	-0.821713	0.000183994	0.000663304	Down	--	-
SMESG000023131.1	-1.32793	0.000583383	0.00191749	Down	--	PAA51774.1 hypothetical protein BOX15_Mlig028140g3 [Macrostomum lignano]
SMESG000023205.1	-1.57988	7.51325e-107	6.74279e-105	Down	Cyt-b5	ABF67509.1 cytochrome b5 [Haliotis discus discus]
SMESG000023221.1	-2.07662	2.15725e-24	3.80588e-23	Down	--	-
SMESG000023234.1	0.840027	4.60285e-11	3.53759e-10	Up	--	-
SMESG000023289.1	0.924132	2.59757e-50	9.98197e-49	Up	NLK	AFD29625.1 NLK-1 [Schmidtea mediterranea]
SMESG000023323.1	0.987134	4.82069e-45	1.67841e-43	Up	NPC2	AAW25262.1 unknown [Schistosoma japonicum]
SMESG000023324.1	-1.54032	3.80646e-15	3.99416e-14	Down	--	AKN21493.1 slc15a-7, partial [Schmidtea mediterranea]
SMESG000023352.1	-1.02973	1.50427e-08	9.05829e-08	Down	AGAP008842	BAR87948.1 aquaporin [Dugesia japonica]
SMESG000023353.1	1.71477	8.80177e-103	7.394e-101	Up	AGAP008842	BAR87948.1 aquaporin [Dugesia japonica]
SMESG000023359.1	-1.68366	2.80905e-37	7.80539e-36	Down	slc38a7	AKN21660.1 slc38a-1 [Schmidtea mediterranea]
SMESG000023427.1	1.53754	3.92613e-12	3.29053e-11	Up	--	-
SMESG000023528.1	-2.53995	1.53722e-38	4.46011e-37	Down	CYP2U1	PAA79583.1 hypothetical protein BOX15_Mlig006662g3 [Macrostomum lignano]
SMESG000023530.1	-2.09759	7.5717e-28	1.54743e-26	Down	CYP2C30	PAA79583.1 hypothetical protein BOX15_Mlig006662g3 [Macrostomum lignano]
SMESG000023628.1	0.839962	0.000101762	0.000382408	Up	Atm	XP_012558729.1 PREDICTED: LOW QUALITY PROTEIN: serine-protein kinase ATM-like [Hydra vulgaris]
SMESG000023649.1	-1.66014	3.16237e-191	6.81987e-189	Down	--	-
SMESG000023662.1	-1.84328	3.85131e-23	6.4184e-22	Down	--	AWV63261.1 tgs-1 [Schmidtea mediterranea]
SMESG000023842.1	-1.67531	1.22094e-129	1.37823e-127	Down	--	PAA53120.1 hypothetical protein BOX15_Mlig018526g3 [Macrostomum lignano]
SMESG000024118.1	-2.46051	5.87384e-50	2.23934e-48	Down	Fuca2	XP_033100644.1 alpha-L-fucosidase-like [Anneissia japonica]
SMESG000024141.1	-4.54629	4.59106e-90	3.30031e-88	Down	--	-
SMESG000024217.1	1.05093	4.90611e-11	3.75867e-10	Up	--	VZI20987.1 unnamed protein product [Sparganum proliferum]
SMESG000024379.1	1.61575	2.04768e-15	2.18838e-14	Up	Grm3	ANO39069.1 GCR106 [Schmidtea mediterranea]
SMESG000024430.1	0.871291	1.9797e-06	9.43428e-06	Up	twk-7	PAA71997.1 hypothetical protein BOX15_Mlig032347g1 [Macrostomum lignano]
SMESG000024476.1	1.62845	1.98853e-17	2.47265e-16	Up	--	-
SMESG000024479.1	-1.62423	3.24328e-131	3.71922e-129	Down	--	-
SMESG000024504.1	-0.954754	1.09529e-32	2.64647e-31	Down	--	AFJ24792.1 TNF receptor associated factor-2, partial [Schmidtea mediterranea]
SMESG000024525.1	-1.17582	6.38732e-29	1.36727e-27	Down	Slc13a5	AKN21480.1 slc13a-1 [Schmidtea mediterranea]
SMESG000024526.1	-1.16857	2.9915e-23	5.02607e-22	Down	Slc13a5	AKN21480.1 slc13a-1 [Schmidtea mediterranea]
SMESG000024592.1	-4.6377	1.27796e-218	3.69304e-216	Down	--	AYA22141.1 TNF receptor-associated factor 3 [Mytilus coruscus]
SMESG000024635.1	1.16603	0.00148419	0.00451269	Up	SMPDL3A	XP_024345759.1 hypothetical protein EGR_10576 [Echinococcus granulosus]
SMESG000024663.1	2.14669	1.82473e-77	1.13157e-75	Up	--	XP_032782336.1 uncharacterized protein LOC116920275 [Daphnia magna]
SMESG000024669.1	-2.19336	2.44637e-38	7.06953e-37	Down	--	XP_028517423.1 uncharacterized protein LOC114575902 [Exaiptasia pallida]
SMESG000024670.1	-1.27163	1.84206e-82	1.19891e-80	Down	HMBS	CDS37641.1 porphobilinogen deaminase [Echinococcus multilocularis]
SMESG000024727.1	-1.27099	1.83294e-51	7.11938e-50	Down	--	VDK75410.1 unnamed protein product [Onchocerca ochengi]
SMESG000024739.1	-2.61206	2.20201e-255	8.83803e-253	Down	Acsl5	XP_013086264.1 PREDICTED: long-chain-fatty-acid--CoA ligase 1-like isoform X2 [Biomphalaria glabrata]
SMESG000024833.1	-5.1731	7.67891e-169	1.24666e-166	Down	INHBA	AGX01005.1 activin 1 [Schmidtea mediterranea]
SMESG000024844.1	-1.29573	1.20649e-32	2.91029e-31	Down	--	-
SMESG000024875.1	-1.27773	2.48704e-06	1.17015e-05	Down	Gstz1	QBM06407.1 glutathione S-transferase zeta, partial [Daphnia magna]
SMESG000024922.1	-1.52388	3.8632e-23	6.4234e-22	Down	--	-
SMESG000025000.1	-0.954918	2.36501e-28	4.98134e-27	Down	--	-
SMESG000025002.1	-1.26715	2.47318e-79	1.56733e-77	Down	--	-
SMESG000025034.1	-0.874826	2.98023e-19	4.1207e-18	Down	Prss52	XP_019139510.2 transmembrane protease serine 7-like [Corvus cornix cornix]
SMESG000025072.1	1.28016	2.359e-07	1.24717e-06	Up	HMBS	AVW80116.1 porphobilinogen deaminase [Dugesia japonica]
SMESG000025075.1	-2.05456	2.03321e-74	1.19422e-72	Down	miox	XP_013420799.1 inositol oxygenase [Lingula anatina]
SMESG000025109.1	0.910112	1.07383e-23	1.84932e-22	Up	--	XP_009066182.1 hypothetical protein LOTGIDRAFT_236810 [Lottia gigantea]
SMESG000025120.1	-0.95758	1.99417e-15	2.13435e-14	Down	ZBED9	XP_023226393.1 general transcription factor II-I repeat domain-containing protein 2A-like [Centruroides sculpturatus]
SMESG000025346.1	1.11896	4.90315e-05	0.00019325	Up	--	-
SMESG000025375.1	-4.54376	1.14906e-103	9.88261e-102	Down	FER1	RNA21358.1 ferritin [Brachionus plicatilis]
SMESG000025410.1	-3.96425	0	0	Down	--	-
SMESG000025482.1	1.77426	1.65092e-70	8.93414e-69	Up	--	XP_023231660.1 Krueppel-like factor 11 isoform X2 [Centruroides sculpturatus]
SMESG000025574.1	1.03061	1.08888e-20	1.62534e-19	Up	--	THD25679.1 Zinc finger protein [Fasciola hepatica]
SMESG000025870.1	-1.54274	7.86754e-103	6.64784e-101	Down	SLC2A4RG	CRL08173.1 CLUMA_CG021018, isoform A [Clunio marinus]
SMESG000025889.1	-3.16973	0	0	Down	--	-
SMESG000026036.1	-2.94406	3.64076e-196	8.48473e-194	Down	SNZERR	ELU04699.1 hypothetical protein CAPTEDRAFT_222963 [Capitella teleta]
SMESG000026037.1	0.92485	4.14037e-08	2.38248e-07	Up	--	KAA0195950.1 putative N-acetyltransferase [Fasciolopsis buski]
SMESG000026168.1	-1.33039	1.33556e-10	9.90631e-10	Down	--	QFQ66893.1 hypothetical protein [Schmidtea mediterranea]
SMESG000026221.1	-1.86132	5.06876e-52	2.00294e-50	Down	kynU	XP_028662344.1 kynureninase [Erpetoichthys calabaricus]
SMESG000026283.1	1.43439	4.47144e-54	1.82508e-52	Up	tcaf	XP_009061190.1 hypothetical protein LOTGIDRAFT_126693 [Lottia gigantea]
SMESG000026301.1	1.09992	1.04383e-33	2.58702e-32	Up	PLG	TNN42854.1 Plasminogen [Liparis tanakae]
SMESG000026398.1	-1.95045	3.84331e-08	2.22039e-07	Down	--	-
SMESG000026402.1	1.52667	3.27474e-19	4.51927e-18	Up	gld-2	TGZ72774.1 hypothetical protein CRM22_001906 [Opisthorchis felineus]
SMESG000026514.1	-1.05668	6.41075e-69	3.35612e-67	Down	pps	PAA89199.1 hypothetical protein BOX15_Mlig003482g1 [Macrostomum lignano]
SMESG000026518.1	-1.23245	3.75394e-57	1.64365e-55	Down	--	AKN21496.1 slc16a-1, partial [Schmidtea mediterranea]
SMESG000026561.1	-2.63747	6.8502e-67	3.48516e-65	Down	CLN8	XP_022300210.1 protein CLN8-like [Crassostrea virginica]
SMESG000026714.1	1.73454	1.36809e-07	7.45104e-07	Up	--	-
SMESG000026752.1	-0.885812	2.10649e-26	4.0154e-25	Down	--	-
SMESG000026848.1	-1.81762	3.19327e-83	2.10683e-81	Down	--	-
SMESG000026849.1	-1.16946	1.41873e-60	6.54929e-59	Down	EHD3	XP_025106103.1 EH domain-containing protein 3-like [Pomacea canaliculata]
SMESG000026862.1	-0.820142	6.69517e-66	3.27927e-64	Down	EEF1B	PAA59197.1 hypothetical protein BOX15_Mlig010068g2 [Macrostomum lignano]
SMESG000027017.1	1.3219	3.85681e-23	6.42017e-22	Up	--	-
SMESG000027096.1	1.06268	0.000598444	0.00196476	Up	--	-
SMESG000027124.1	-3.46061	8.86088e-195	2.03224e-192	Down	--	XP_026732213.1 uncharacterized protein LOC113496989 [Trichoplusia ni]
SMESG000027140.1	-5.15787	7.98478e-252	2.95826e-249	Down	--	-
SMESG000027142.1	-5.51904	1.66032e-152	2.28476e-150	Down	--	-
SMESG000027188.1	0.979019	2.1087e-05	8.72776e-05	Up	--	-
SMESG000027204.1	-1.05732	1.49726e-69	7.95364e-68	Down	acsbg2	XP_017307774.1 PREDICTED: long-chain-fatty-acid--CoA ligase ACSBG2-like [Ictalurus punctatus]
SMESG000027225.1	-1.66222	3.86328e-17	4.70662e-16	Down	TF	AFJ24848.1 transferrin-1 [Schmidtea mediterranea]
SMESG000027283.1	-1.12076	4.06008e-28	8.41667e-27	Down	--	AFJ24792.1 TNF receptor associated factor-2, partial [Schmidtea mediterranea]
SMESG000027326.1	-1.51717	1.13416e-05	4.87288e-05	Down	--	-
SMESG000027347.1	0.982231	4.59049e-05	0.00018172	Up	--	-
SMESG000027385.1	0.846521	2.74643e-05	0.000112131	Up	PCBP4	THD22716.1 Poly(rC)-binding protein 2 [Fasciola hepatica]
SMESG000027389.1	-4.11639	1.46513e-146	1.90718e-144	Down	CLN5	XP_009059770.1 hypothetical protein LOTGIDRAFT_125348 [Lottia gigantea]
SMESG000027403.1	1.22611	0.00301749	0.00850393	Up	CaMKI	VDM16908.1 unnamed protein product [Hydatigera taeniaeformis]
SMESG000027404.1	-3.29296	7.88758e-41	2.4197e-39	Down	--	-
SMESG000027530.1	1.08992	5.89678e-11	4.48199e-10	Up	SPEC3	XP_021341520.1 uncharacterized protein LOC110442313 [Mizuhopecten yessoensis]
SMESG000027545.1	-0.850455	2.76472e-42	8.77967e-41	Down	FBPA	XP_022343831.1 LOW QUALITY PROTEIN: fructose-bisphosphate aldolase-like [Crassostrea virginica]
SMESG000027548.1	0.861435	6.06449e-28	1.24116e-26	Up	--	PAA60161.1 hypothetical protein BOX15_Mlig015220g2, partial [Macrostomum lignano]
SMESG000027728.1	-0.920712	9.0472e-08	4.99515e-07	Down	--	-
SMESG000027798.1	0.988525	9.23022e-23	1.50868e-21	Up	pim2	AVM18989.1 PIM-1 [Schmidtea mediterranea]
SMESG000027907.1	-3.88304	7.97628e-97	6.33238e-95	Down	Plb1	PAA84188.1 hypothetical protein BOX15_Mlig030000g3 [Macrostomum lignano]
SMESG000027911.1	-0.892379	5.59574e-37	1.5313e-35	Down	FPGS	OQV17340.1 Folylpolyglutamate synthase, mitochondrial [Hypsibius dujardini]
SMESG000027979.1	-1.87682	2.12156e-167	3.40605e-165	Down	--	AFJ24740.1 hypothetical protein [Schmidtea mediterranea]
SMESG000028039.1	-2.09701	4.68562e-25	8.44171e-24	Down	--	-
SMESG000028183.1	-0.921733	8.28642e-16	9.13973e-15	Down	--	RTG83906.1 uncharacterized protein DC041_0012603 [Schistosoma bovis]
SMESG000028186.1	-1.24269	1.27238e-55	5.37561e-54	Down	--	-
SMESG000028193.1	0.870873	3.47349e-55	1.45474e-53	Up	VCL	XP_025087818.1 vinculin-like isoform X9 [Pomacea canaliculata]
SMESG000028209.1	-1.45768	1.86743e-11	1.4793e-10	Down	--	-
SMESG000028261.1	2.52577	4.7645e-58	2.10527e-56	Up	--	ADW66116.1 lectin-like protein, partial [Schmidtea mediterranea]
SMESG000028264.1	5.34183	3.7044e-74	2.15826e-72	Up	--	ADW66116.1 lectin-like protein, partial [Schmidtea mediterranea]
SMESG000028419.1	-1.21134	1.36185e-14	1.377e-13	Down	imt1	PAA52406.1 hypothetical protein BOX15_Mlig010228g2 [Macrostomum lignano]
SMESG000028420.1	-2.85588	1.00739e-238	3.38506e-236	Down	--	-
SMESG000028470.1	-1.16596	1.06039e-16	1.25587e-15	Down	NUDT16	XP_013062792.1 PREDICTED: U8 snoRNA-decapping enzyme-like isoform X3 [Biomphalaria glabrata]
SMESG000028475.1	-2.10275	1.96273e-122	2.11638e-120	Down	SLCO1B3	AKN21547.1 slc21a-2 [Schmidtea mediterranea]
SMESG000028481.1	-0.916086	2.71752e-47	9.89053e-46	Down	SCCPDH	EFX79772.1 hypothetical protein DAPPUDRAFT_188248 [Daphnia pulex]
SMESG000028714.1	-2.03923	1.70881e-154	2.42065e-152	Down	acp7	QGW52015.1 acid phosphatase type 7A [Dugesia japonica]
SMESG000028980.1	-1.23275	5.60036e-18	7.13577e-17	Down	SLC47A1	AKN21704.1 slc47a-7 [Schmidtea mediterranea]
SMESG000029023.1	-2.13882	3.02489e-11	2.34982e-10	Down	TDH	XP_002008271.1 L-threonine 3-dehydrogenase, mitochondrial [Drosophila mojavensis]
SMESG000029046.1	-2.91789	1.55214e-191	3.398e-189	Down	TMEM144	XP_026696612.1 transmembrane protein 144 isoform X1 [Ciona intestinalis]
SMESG000029089.1	-2.26447	5.31213e-32	1.25212e-30	Down	--	-
SMESG000029095.1	-1.2499	8.10391e-06	3.55367e-05	Down	--	-
SMESG000029096.1	-2.15541	1.93936e-141	2.43669e-139	Down	--	AFJ24856.1 retinoblastoma binding protein-1 [Schmidtea mediterranea]
SMESG000029118.1	-0.901907	8.4225e-08	4.66271e-07	Down	--	XP_022095976.1 putative methyltransferase DDB_G0268948 [Acanthaster planci]
SMESG000029138.1	-1.38369	5.04007e-06	2.29367e-05	Down	TMT1	XP_022096077.1 putative methyltransferase DDB_G0268948 isoform X3 [Acanthaster planci]
SMESG000029150.1	-1.37859	2.10136e-05	8.70484e-05	Down	--	XP_002679460.1 predicted protein [Naegleria gruberi strain NEG-M] [Naegleria gruberi]
SMESG000029291.1	-1.00311	7.48171e-19	1.01031e-17	Down	--	PAA66905.1 hypothetical protein BOX15_Mlig002220g2 [Macrostomum lignano]
SMESG000029294.1	-0.93415	1.14668e-66	5.79313e-65	Down	pol	PAA92840.1 hypothetical protein BOX15_Mlig002220g3 [Macrostomum lignano]
SMESG000029319.1	0.81386	7.20287e-17	8.60829e-16	Up	--	ANP44411.1 epidermal growth factor Smed-egf-6 [Schmidtea mediterranea]
SMESG000029404.1	-0.83613	5.97919e-18	7.60504e-17	Down	MAOB	XP_013070480.1 PREDICTED: probable flavin-containing monoamine oxidase A [Biomphalaria glabrata]
SMESG000029581.1	1.85432	3.3485e-18	4.3045e-17	Up	--	-
SMESG000029594.1	-1.44541	1.15391e-46	4.11676e-45	Down	--	-
SMESG000029602.1	-2.21746	0.000206284	0.00073595	Down	--	AFJ24802.1 hypothetical protein, partial [Schmidtea mediterranea]
SMESG000029612.1	-3.11557	1.16168e-244	4.09392e-242	Down	--	KAF2348572.1 Integrase catalytic core [Trinorchestia longiramus]
SMESG000029728.1	-0.813982	0.0389911	0.0817325	Down	--	-
SMESG000029734.1	-0.920644	3.28536e-07	1.71002e-06	Down	--	-
SMESG000029906.1	-2.59424	4.58214e-75	2.71341e-73	Down	--	PAA57824.1 hypothetical protein BOX15_Mlig031394g1, partial [Macrostomum lignano]
SMESG000030111.1	-1.50297	0.000151933	0.000555488	Down	slc24a5	AKN21566.1 slc24a-6, partial [Schmidtea mediterranea]
SMESG000030276.1	-0.85276	0.026515	0.0584843	Down	--	-
SMESG000030353.1	-1.40139	3.51286e-41	1.08921e-39	Down	--	XP_013419244.1 endoglycoceramidase [Lingula anatina]
SMESG000030357.1	-1.93415	6.34632e-06	2.83982e-05	Down	--	XP_013419244.1 endoglycoceramidase [Lingula anatina]
SMESG000030369.1	-1.57374	3.96835e-15	4.14896e-14	Down	--	XP_013419244.1 endoglycoceramidase [Lingula anatina]
SMESG000030467.1	-1.05941	3.7164e-07	1.92674e-06	Down	--	-
SMESG000030475.1	1.36903	1.49445e-62	7.1265e-61	Up	--	-
SMESG000030689.1	-0.951867	5.6988e-08	3.22152e-07	Down	--	-
SMESG000030835.1	-3.53559	6.07462e-178	1.12528e-175	Down	slc15a4	AKN21492.1 slc15a-6 [Schmidtea mediterranea]
SMESG000030911.1	-0.884312	2.94501e-08	1.72486e-07	Down	--	-
SMESG000030918.1	0.951978	1.76945e-20	2.60089e-19	Up	Best3	CDS26236.1 bestrophin 2 [Hymenolepis microstoma]
SMESG000030921.1	0.850358	5.3398e-16	5.94412e-15	Up	--	-
SMESG000030981.1	-5.59592	0	0	Down	--	AEN71564.1 ferritin 3 [Argopecten irradians]
SMESG000031046.1	-3.25257	2.0836e-69	1.10278e-67	Down	--	XP_007906270.1 PREDICTED: stimulated by retinoic acid gene 6 protein homolog [Callorhinchus milii]
SMESG000031097.1	1.3204	4.34872e-14	4.2256e-13	Up	ctbp-1	OZG24668.1 hypothetical protein FL83_00450, partial [Caenorhabditis latens]
SMESG000031101.1	-1.55241	9.12647e-23	1.49341e-21	Down	--	XP_019925026.1 PREDICTED: uncharacterized protein LOC105333658 [Crassostrea gigas]
SMESG000031104.1	-1.44724	5.72205e-81	3.67457e-79	Down	--	XP_022796263.1 dual serine/threonine and tyrosine protein kinase-like [Stylophora pistillata]
SMESG000031125.1	-3.12678	6.59515e-117	6.7108e-115	Down	MJ1319	AKN21444.1 slc6a-24 [Schmidtea mediterranea]
SMESG000031127.1	-1.86965	2.02993e-33	4.99666e-32	Down	HI_0736	AKN21444.1 slc6a-24 [Schmidtea mediterranea]
SMESG000031290.1	1.2762	2.14694e-30	4.84706e-29	Up	--	AHD24720.1 X1.A2.3 [Schmidtea mediterranea]
SMESG000031543.1	-3.70835	2.06535e-77	1.27531e-75	Down	Crispld2	XP_019925963.1 PREDICTED: TPR repeat-containing protein DDB_G0287407-like [Crassostrea gigas]
SMESG000031561.1	-2.68457	3.96736e-30	8.88749e-29	Down	nAChRbeta1	PAA52239.1 hypothetical protein BOX15_Mlig019166g1 [Macrostomum lignano]
SMESG000031677.1	-0.82276	3.18628e-22	5.08713e-21	Down	--	PAA93900.1 hypothetical protein BOX15_Mlig034563g1 [Macrostomum lignano]
SMESG000031786.1	-1.16751	3.96124e-41	1.22561e-39	Down	--	XP_013385262.1 cation-dependent mannose-6-phosphate receptor [Lingula anatina]
SMESG000031874.1	1.55614	2.59009e-74	1.51515e-72	Up	PTPRB	KPM09442.1 tyrosine-protein phosphatase 10D-like protein [Sarcoptes scabiei]
SMESG000031930.1	2.75164	0	0	Up	mib1	XP_007070246.1 LOW QUALITY PROTEIN: E3 ubiquitin-protein ligase MIB2 [Chelonia mydas]
SMESG000031949.1	-2.54511	9.92427e-21	1.48443e-19	Down	--	-
SMESG000031958.1	-0.970063	2.95489e-44	9.90608e-43	Down	--	AFJ24833.1 IAP domain containing-1, partial [Schmidtea mediterranea]
SMESG000032045.1	0.801985	9.31993e-32	2.18256e-30	Up	Ptpn13	XP_031756171.1 tenascin-X-like isoform X8 [Xenopus tropicalis]
SMESG000032177.1	1.25458	0.00287949	0.00815958	Up	GST1	XP_021944983.1 glutathione S-transferase-like [Folsomia candida]
SMESG000032312.1	0.81427	0.0299311	0.0649166	Up	HSL1	AVM18990.1 PIM-1-like protein [Schmidtea mediterranea]
SMESG000032396.1	-3.12587	7.57669e-283	3.77502e-280	Down	UROC1	RWS03308.1 urocanate hydratase-like isoform X1 [Dinothrombium tinctorium]
SMESG000032411.1	-0.826049	3.51893e-33	8.58869e-32	Down	Nudt8	XP_013776472.1 nucleoside diphosphate-linked moiety X motif 8-like isoform X2 [Limulus polyphemus]
SMESG000032457.1	-0.93291	6.39104e-30	1.4185e-28	Down	SERPINB3	XP_017384265.1 PREDICTED: serpin B3 isoform X1 [Cebus capucinus imitator]
SMESG000032489.1	-1.11377	3.69511e-77	2.27194e-75	Down	RBM47	TGZ68491.1 hypothetical protein CRM22_004239 [Opisthorchis felineus]
SMESG000032510.1	0.82701	0.000447652	0.00150247	Up	-	-
SMESG000032522.1	-5.20953	2.23358e-107	2.02974e-105	Down	--	XP_013091464.1 PREDICTED: uncharacterized protein LOC106075092 [Biomphalaria glabrata]
SMESG000032525.1	-1.24487	4.58108e-16	5.13515e-15	Down	--	-
SMESG000032684.1	0.921406	0.0018287	0.00543346	Up	Poln	XP_019631984.1 PREDICTED: uncharacterized protein LOC109475667 isoform X1 [Branchiostoma belcheri]
SMESG000032700.1	-0.837711	3.5964e-05	0.000144346	Down	--	XP_025088463.1 LOW QUALITY PROTEIN: BTB/POZ domain-containing protein 17-like [Pomacea canaliculata]
SMESG000032703.1	-1.14239	1.22377e-22	1.989e-21	Down	DDB_G0284251	AKN21681.1 slc42a-1 [Schmidtea mediterranea]
SMESG000032765.1	0.942537	0.00667131	0.0174153	Up	--	-
SMESG000032891.1	-1.32669	1.02642e-68	5.33478e-67	Down	ABCA1	XP_013414368.2 LOW QUALITY PROTEIN: ATP-binding cassette sub-family A member 1-like [Lingula anatina]
SMESG000033033.1	-1.91686	9.82589e-67	4.98156e-65	Down	--	TNN18903.1 Lipopolysaccharide-induced tumor necrosis factor-alpha factor isoform 1 [Schistosoma japonicum]
SMESG000033280.1	1.1882	1.08684e-38	3.16607e-37	Up	PLXND1	AJA72714.1 plexin B-4, partial [Schmidtea mediterranea]
SMESG000033282.1	-0.866239	5.85464e-10	4.08665e-09	Down	--	AJA72714.1 plexin B-4, partial [Schmidtea mediterranea]
SMESG000033300.1	0.816358	2.05223e-09	1.35773e-08	Up	--	AJA72715.1 plexin B-5, partial [Schmidtea mediterranea]
SMESG000033328.1	1.20456	2.47528e-85	1.67912e-83	Up	PLXNB2	AJA72714.1 plexin B-4, partial [Schmidtea mediterranea]
SMESG000033348.1	-0.980624	7.13291e-08	3.98544e-07	Down	Rm62	VDP24788.1 unnamed protein product [Echinostoma caproni]
SMESG000033386.1	-2.92286	1.74476e-47	6.36618e-46	Down	--	-
SMESG000033458.1	0.843402	1.53372e-23	2.62257e-22	Up	--	AFJ24869.1 slit-2 [Schmidtea mediterranea]
SMESG000033462.1	1.13045	2.10379e-32	5.02442e-31	Up	--	-
SMESG000033502.1	0.851439	9.42705e-05	0.000356481	Up	gar-2	ANO39020.1 GCR043 [Schmidtea mediterranea]
SMESG000033518.1	-1.94292	1.10422e-23	1.89938e-22	Down	Trhde	AFJ24858.1 hypothetical protein, partial [Schmidtea mediterranea]
SMESG000033570.1	-0.812002	1.76173e-17	2.1982e-16	Down	--	AFH08797.1 rictor, partial [Schmidtea mediterranea]
SMESG000033571.1	-0.801278	5.55069e-11	4.23452e-10	Down	RICTOR	AFH08797.1 rictor, partial [Schmidtea mediterranea]
SMESG000033605.1	-0.815804	6.18437e-15	6.38271e-14	Down	Slc31a1	AKN21632.1 slc31a-2 [Schmidtea mediterranea]
SMESG000033615.1	-1.45395	2.27219e-12	1.94611e-11	Down	--	RMX35982.1 hypothetical protein pdam_00005184 [Pocillopora damicornis]
SMESG000033650.1	-2.29358	5.44102e-53	2.19601e-51	Down	CYP46A1	TRZ24407.1 hypothetical protein HGM15179_002614 [Zosterops borbonicus]
SMESG000033682.1	0.950587	0.013618	0.0327306	Up	--	-
SMESG000033796.1	1.141	5.07338e-35	1.31371e-33	Up	--	XP_009025398.1 hypothetical protein HELRODRAFT_163206 [Helobdella robusta]
SMESG000034030.1	-2.02945	8.34227e-166	1.2961e-163	Down	DPYD	XP_022315388.1 dihydropyrimidine dehydrogenase [NADP(+)]-like [Crassostrea virginica]
SMESG000034055.1	0.813171	3.62049e-11	2.79895e-10	Up	PDE4B	XP_031658363.1 cAMP-specific 3',5'-cyclic phosphodiesterase 4D-like isoform X4 [Oncorhynchus kisutch]
SMESG000034071.1	0.857878	8.04435e-19	1.08426e-17	Up	YRK	TNN11703.1 Tyrosine-protein kinase Fyn isoform 1 [Schistosoma japonicum]
SMESG000034294.1	1.81565	6.82265e-24	1.17919e-22	Up	Cp1	VDL99111.1 unnamed protein product [Schistocephalus solidus]
SMESG000034497.1	1.2015	1.2535e-27	2.54379e-26	Up	RCN1	KAA0194773.1 Calumenin-B [Fasciolopsis buski]
SMESG000034791.1	-1.05793	9.00105e-45	3.08922e-43	Down	FAAH	OCT82705.1 hypothetical protein XELAEV_18025235mg [Xenopus laevis]
SMESG000034829.1	-3.03236	6.57657e-148	8.71788e-146	Down	--	-
SMESG000034868.1	0.865002	1.41466e-18	1.86841e-17	Up	ZNFX1	XP_019640137.1 PREDICTED: NFX1-type zinc finger-containing protein 1-like [Branchiostoma belcheri]
SMESG000034921.1	-1.14644	8.77206e-07	4.34811e-06	Down	--	-
SMESG000034947.1	-0.836376	0.0145572	0.0347092	Down	--	RJW73867.1 Testis-expressed sequence 2 protein [Clonorchis sinensis]
SMESG000034972.1	-1.38076	8.75218e-05	0.00033244	Down	--	-
SMESG000035028.1	0.822693	1.69048e-25	3.11552e-24	Up	TMEM30A	PAA47597.1 hypothetical protein BOX15_Mlig007709g3 [Macrostomum lignano]
SMESG000035036.1	-1.59966	1.03686e-22	1.68903e-21	Down	--	QFQ66892.1 hypothetical protein [Schmidtea mediterranea]
SMESG000035037.1	-1.87034	1.98874e-12	1.7135e-11	Down	--	QFQ66892.1 hypothetical protein [Schmidtea mediterranea]
SMESG000035040.1	-1.00048	1.90335e-14	1.89535e-13	Down	--	QFQ66892.1 hypothetical protein [Schmidtea mediterranea]
SMESG000035061.1	-1.08619	2.96017e-07	1.55138e-06	Down	--	QFQ66892.1 hypothetical protein [Schmidtea mediterranea]
SMESG000035068.1	-0.882271	6.39639e-17	7.6762e-16	Down	--	QFQ66892.1 hypothetical protein [Schmidtea mediterranea]
SMESG000035163.1	-0.96191	1.84931e-25	3.39958e-24	Down	--	ANO39108.1 GCR153 [Schmidtea mediterranea]
SMESG000035181.1	-1.20777	1.34658e-37	3.80014e-36	Down	IDH1	XP_013407452.1 isocitrate dehydrogenase [NADP] cytoplasmic [Lingula anatina]
SMESG000035197.1	0.998584	4.5214e-24	7.8996e-23	Up	SLC16A9	AKN21512.1 slc16a-17 [Schmidtea mediterranea]
SMESG000035227.1	-0.841066	2.0721e-17	2.57436e-16	Down	tpm	XP_013388872.1 probable thiopurine S-methyltransferase [Lingula anatina]
SMESG000035238.1	-1.0989	8.85051e-27	1.72812e-25	Down	--	-
SMESG000035252.1	1.01118	3.31283e-12	2.79383e-11	Up	--	-
SMESG000035253.1	0.972176	7.29068e-07	3.64218e-06	Up	--	THD26979.1 Rhodopsin orphan GPCR [Fasciola hepatica]
SMESG000035344.1	-0.971583	1.83036e-70	9.86823e-69	Down	AAEL006169	XP_011865870.1 PREDICTED: lysosomal aspartic protease [Vollenhovia emeryi]
SMESG000035381.1	1.96152	2.57761e-32	6.12564e-31	Up	DUSP10	BAK52368.1 mitogen-activated protein kinase phosphatase [Dugesia japonica]
SMESG000035432.1	1.051	1.58513e-10	1.16796e-09	Up	--	-
SMESG000035442.1	0.836421	0.000430973	0.00145222	Up	--	-
SMESG000035446.1	1.03396	2.24436e-63	1.07737e-61	Up	--	XP_020612171.1 TNF receptor-associated factor 5-like [Orbicella faveolata]
SMESG000035449.1	1.6289	8.39925e-11	6.3143e-10	Up	--	-
SMESG000035450.1	0.966209	1.50375e-16	1.75791e-15	Up	--	-
SMESG000035470.1	-0.835093	0.00215941	0.0063084	Down	--	-
SMESG000035551.1	-1.09186	2.02945e-15	2.17051e-14	Down	--	-
SMESG000035626.1	0.855537	1.96965e-19	2.73912e-18	Up	--	TNN09045.1 Endoglin antigen [Schistosoma japonicum]
SMESG000035878.1	-0.976056	4.70679e-27	9.35466e-26	Down	--	XP_001962336.2 uncharacterized protein LOC6497315 [Drosophila ananassae]
SMESG000035904.1	1.31309	5.38836e-21	8.15251e-20	Up	--	AFJ24813.1 GRB2 associated binding protein-1 [Schmidtea mediterranea]
SMESG000035938.1	-0.9372	1.7539e-14	1.75135e-13	Down	--	-
SMESG000035953.1	-2.74274	6.57646e-77	4.00942e-75	Down	Slc26a6	AKN21605.1 slc26a-1 [Schmidtea mediterranea]
SMESG000035965.1	1.17039	0.00037664	0.00128193	Up	Abca5	TGZ67601.1 hypothetical protein CRM22_004688 [Opisthorchis felineus]
SMESG000036036.1	-7.00011	0	0	Down	--	KAA0191751.1 Gynecophoral canal protein [Fasciolopsis buski]
SMESG000036037.1	-7.11404	8.47044e-207	2.22526e-204	Down	--	VDK87667.1 unnamed protein product [Dibothriocephalus latus]
SMESG000036210.1	1.21256	3.462e-100	2.82613e-98	Up	NAV2	XP_009064461.1 hypothetical protein LOTGIDRAFT_131500, partial [Lottia gigantea]
SMESG000036223.1	1.48465	1.37473e-15	1.48679e-14	Up	--	-
SMESG000036259.1	0.840672	0.000280411	0.000978423	Up	--	VDP70929.1 unnamed protein product [Echinostoma caproni]
SMESG000036361.1	0.809995	0.000121896	0.00045242	Up	ZNF217	CDS40983.1 zinc finger protein 333 [Echinococcus multilocularis]
SMESG000036363.1	0.897219	1.13673e-58	5.13267e-57	Up	GLIPR1L1	BAV60025.1 hypothetical protein, partial [Dugesia japonica]
SMESG000036408.1	-4.77956	4.70139e-183	9.56765e-181	Down	--	-
SMESG000036533.1	-1.23063	6.67416e-67	3.4076e-65	Down	DBI	XP_021948487.1 acyl-CoA-binding protein-like [Folsomia candida]
SMESG000036870.1	-2.21794	1.85947e-38	5.38426e-37	Down	--	-
SMESG000036895.1	-1.7036	9.38553e-49	3.52238e-47	Down	RIDA	XP_002710629.2 PREDICTED: ribonuclease UK114 [Oryctolagus cuniculus]
SMESG000036926.1	-2.11134	1.49223e-58	6.69605e-57	Down	--	-
SMESG000036932.1	-3.34461	6.97336e-140	8.53882e-138	Down	--	-
SMESG000036946.1	-1.18419	2.71201e-66	1.35591e-64	Down	gyg-1	XP_030906950.1 glycogenin-2 isoform X1 [Melopsittacus undulatus]
SMESG000037031.1	-1.02546	0.00367207	0.0101819	Down	gata4	AFF18488.1 GATA456 [Schmidtea mediterranea]
SMESG000037302.1	-1.14486	0.000216722	0.000770145	Down	GALK1	XP_019616678.1 PREDICTED: galactokinase-like [Branchiostoma belcheri]
SMESG000037362.1	-2.36271	5.07353e-52	2.00294e-50	Down	pm20d2	XP_014771841.1 PREDICTED: peptidase M20 domain-containing protein 2-like [Octopus bimaculoides]
SMESG000037449.1	-0.951308	1.14933e-06	5.62749e-06	Down	--	XP_002429601.1 ganglioside induced differentiation associated protein, putative [Pediculus humanus corporis]
SMESG000037481.1	1.32862	3.48705e-35	9.06195e-34	Up	ak2	XP_005099746.1 PREDICTED: adenylate kinase-like [Aplysia californica]
SMESG000037532.1	-3.38594	5.51055e-39	1.61505e-37	Down	SAT2	XP_031555174.1 diamine acetyltransferase 2-like [Actinia tenebrosa]
SMESG000037573.1	-2.46993	7.09126e-55	2.9443e-53	Down	--	-
SMESG000037637.1	0.866872	6.31413e-12	5.18958e-11	Up	--	-
SMESG000037645.1	-1.00964	2.93804e-06	1.37207e-05	Down	--	KAA3672323.1 uncharacterized protein DEA37_0001980 [Paragonimus westermani]
SMESG000037658.1	-2.86424	1.19368e-44	4.08707e-43	Down	--	-
SMESG000037709.1	-0.966977	0.000329649	0.00113515	Down	--	PAA50201.1 hypothetical protein BOX15_Mlig021248g5 [Macrostomum lignano]
SMESG000037719.1	-1.97501	4.05223e-28	8.41246e-27	Down	Gnmt	RVE67650.1 hypothetical protein OJAV_G00104970 [Oryzias javanicus]
SMESG000037733.1	-0.98131	1.16607e-05	4.99662e-05	Down	--	-
SMESG000037740.1	-2.84518	8.72112e-91	6.30057e-89	Down	PLA2G15	XP_009173508.1 hypothetical protein T265_09225 [Opisthorchis viverrini]
SMESG000037749.1	-1.15397	8.34558e-51	3.2242e-49	Down	--	-
SMESG000037790.1	1.87109	6.02394e-23	9.92473e-22	Up	--	-
SMESG000037948.1	1.13282	1.68771e-66	8.46725e-65	Up	--	-
SMESG000037965.1	1.1512	4.7975e-06	2.19087e-05	Up	ZNF488	ELT97137.1 hypothetical protein CAPTEDRAFT_221467 [Capitella teleta]
SMESG000037971.1	1.44447	7.83808e-200	1.98689e-197	Up	sn	PAA92187.1 hypothetical protein BOX15_Mlig023083g2 [Macrostomum lignano]
SMESG000037977.1	-6.16643	1.41594e-58	6.37351e-57	Down	apolpp	PAA80758.1 hypothetical protein BOX15_Mlig027085g4 [Macrostomum lignano]
SMESG000037978.1	-6.15199	5.06741e-174	8.92915e-172	Down	apolpp	AYP74774.1 apolipophorin 2A [Sepioteuthis lessoniana]
SMESG000037996.1	1.80604	8.78437e-19	1.1796e-17	Up	G2	AFJ24821.1 tissue factor pathway inhibitor-1 [Schmidtea mediterranea]
SMESG000038000.1	1.61837	1.11163e-21	1.73643e-20	Up	Ppn	XP_023226201.1 papilin-like [Centruroides sculpturatus]
SMESG000038052.1	-0.942421	8.86673e-28	1.8019e-26	Down	--	XP_003396032.1 kunitz-type serine protease inhibitor Bt-KTI [Bombus terrestris]
SMESG000038209.1	1.02207	0.000140539	0.00051644	Up	-	-
SMESG000038305.1	-0.903084	7.68247e-16	8.49304e-15	Down	--	AFJ24776.1 hypothetical protein [Schmidtea mediterranea]
SMESG000038313.1	1.00564	7.64429e-10	5.26214e-09	Up	--	AFJ24776.1 hypothetical protein [Schmidtea mediterranea]
SMESG000038673.1	-2.676	1.52799e-45	5.35872e-44	Down	--	-
SMESG000038687.1	-3.03255	4.34269e-71	2.39494e-69	Down	--	-
SMESG000038737.1	-1.01337	0.0129257	0.0312732	Down	--	-
[truncated: 685 more rows]
